# Supplementary material for: New glucuronic acid donors for the modular synthesis of heparan sulfate oligosaccharides
Source: Royal Society of Chemistry journal article supplement (doi:10.1039/c3ob42312c), 2014-01-01

## Supporting Information

### **New Glucuronic Acid Donors for the Modular Synthesis of Heparan Sulfate Oligosaccharides**

Omkar P. Dhamale, Chengli Zong, Kanar Al-Mafraji and Geert-Jan Boons\*

Complex Carbohydrate Research Center, The University of Georgia, 315 Riverbend Road,  
Athens, GA 30602. E-mail: [gjboons@ccrc.uga.edu](mailto:gjboons@ccrc.uga.edu); Fax: +1 706-542-4412

#### **Table of contents:**

Preparations and characterizations of compounds **37**, **38**, **S1-S6**

Copies of <sup>1</sup>H and HSQC NMR spectra

**Methyl (Phenyl 2-O-levulinoyl-3-O-benzyl-4-O-(9-fluorenylmethoxycarbonyl)-1-thio- $\alpha$ -L-idopyranoside)uronate (37).** Compound **37** was prepared according to a literature procedure (S. U. Hansen, G. J. Miller, G. C. Jayson and J. M. Gardiner, *Org. Lett.*, 2013, **15**, 88-91).  $^1\text{H}$  NMR (300 MHz,  $\text{CDCl}_3$ )  $\delta$  7.82 – 7.22 (m, 18H, CH Aromatic), 5.64 (s, 1H, H-1), 5.42 (d,  $J = 2.1$  Hz, 1H, H-5), 5.22 – 5.09 (m, 2H, H-2, H-5), 4.85 (d,  $J = 11.7$  Hz, 1H, CHHBn), 4.79 – 4.68 (d,  $J = 11.7$  Hz, 1H, CHHBn), 4.51 (dd,  $J = 10.3, 7.3$  Hz, 1H, CHHNap), 4.36 (dd,  $J = 10.5, 7.3$  Hz, 1H, CHHNap), 4.22 (t,  $J = 7.2$  Hz, 1H, CHNap), 3.95 (t,  $J = 2.9$  Hz, 1H, H-3), 3.79 (s, 3H,  $\text{COOCH}_3$ ), 2.77 – 2.37 (m, 4H,  $\text{CH}_2\text{Lev}$ ), 2.03 (s, 3H,  $\text{CH}_3\text{Lev}$ ).  $^{13}\text{C}$  NMR (75 MHz,  $\text{CDCl}_3$ )  $\delta$  130.7, 127.7, 127.5, 124.7, 119.8, 85.8, 73.7, 71.6, 69.3, 69.6, 67.7, 67.5, 49.0, 46.7, 29.9, 28.2. HRMS:  $m/z$ : calcd for  $\text{C}_{40}\text{H}_{38}\text{O}_{10}\text{SNa}$ : 733.2083; found: 733.2090  $[\text{M}+\text{Na}]^+$ .

***N*-(Benzyl)-benzyloxycarbonyl-5-aminopentyl-*O*-(methyl-2-*O*-levulinoyl-3-*O*-benzyl- $\alpha$ -L-idopyranosyluronate)-(1 $\rightarrow$ 4)-*O*-2-azido-3-*O*-benzyl-6-*O*-levulinoyl- $\alpha$ -D-glycopyranoside (38).** A suspension of compounds **37** (1.51 g, 2.13 mmol), **30** (1.01 g, 1.42 mmol) and activated molecular sieves (4Å crushed, 150 mg) in dichloromethane (20 mL) was stirred at ambient temperature under an atmosphere of Ar for 1 h. The mixture was cooled to 0 °C followed by addition of NIS (0.35 mg, 2.56 mmol) and AgOTf (0.18 g, 0.71 mmol). TLC analysis (hexane/EtOAc, 1/1, v/v) showed complete consumption of the donor.  $\text{Et}_3\text{N}$  (4 mL) was added and stirred for another 1 h followed by filtration through a pad of Celite and the filtrate was concentrated under reduced pressure. The residue was purified by silica gel column chromatography using a gradient of hexane /EtOAc (2/1  $\rightarrow$  1/1, v/v) to give compound **38** as oil (1.07 g, 70%). (NMR data reported in: S. Arungundram, K. Al-Mafraji, J. Asong, F. E. Leach, III, I. J. Amster, A. Venot, J. E. Turnbull and G. J. Boons, *J. Am. Chem. Soc.*, 2009, **131**, 17394-17405).

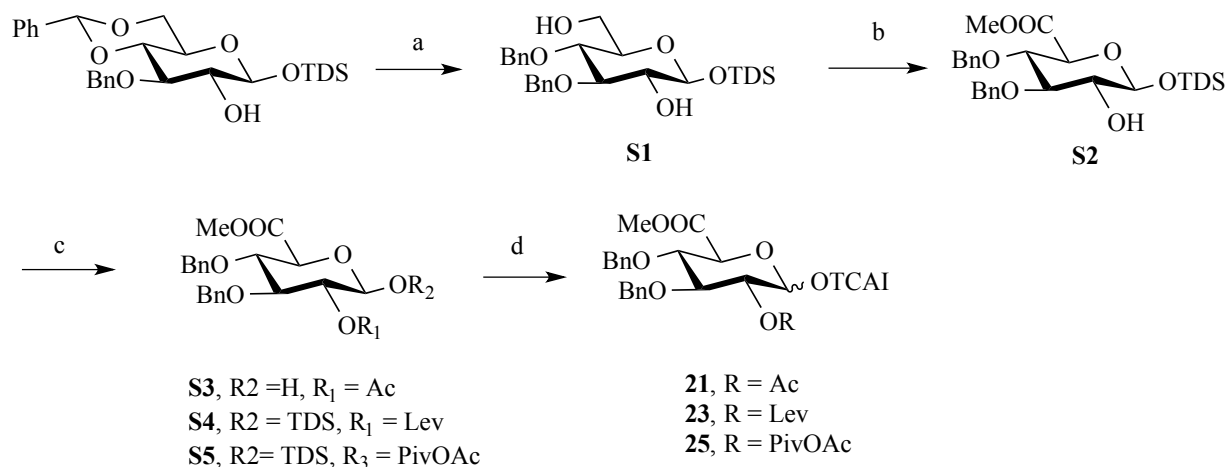

**Scheme S1.** Synthesis of glucuronic acid donors with C-4 benzyl ether. Reagents and conditions: a) Et<sub>3</sub>SiH<sub>3</sub>, PhBCl<sub>3</sub>, 3Å Molecular sieves, DCM, -78 °C (91%); b) (i) TEMPO, BAIB, rt, DCM, H<sub>2</sub>O; (ii) CH<sub>2</sub>N<sub>2</sub>, Et<sub>2</sub>O, (84%); c) (i) Ac<sub>2</sub>O, pyridine and then HF:Pyr. THF (79%, **S3**); (ii) levulinic acid, DCC, DMAP, rt, DCM, (89%, **S4**); (iii) PivOAc-Cl, DMAP, Pyr., (88%, **S5**); d) (i) HF:Pyr. THF; (ii) Cl<sub>3</sub>CCN, NaH, DCM.

**Dimethylthexylsilyl 3,4-O-benzyl-β-D-glucopyranoside (S1).** A solution of compound **1** (1.00 g, 2.00 mmol) and activated molecular sieves (3Å, 1.00 g) in dichloromethane (20 mL) was stirred at ambient temperature under an atmosphere of Ar for 1 h. The mixture was cooled to -78 °C followed by addition of Et<sub>3</sub>SiH (576 μL, 6.00 mmol) and PhBCl<sub>2</sub> (1.50 mL, 7.00 mmol). After being stirred for 1 h at -78 °C, Et<sub>3</sub>N (3 mL) and MeOH (3 mL) were added successively, and the mixture was diluted with CHCl<sub>3</sub> (20 mL) and washed with NaHCO<sub>3</sub> (sat.), dried (MgSO<sub>4</sub>), filtered and the filtrate was concentrated under reduced pressure. The residue was purified by silica gel column chromatography using a gradient of CHCl<sub>3</sub>/MeOH (95/5 → 80/20, v/v) to give compound **S1** as oil (0.91 g, 91%). <sup>1</sup>H NMR (500 MHz, CDCl<sub>3</sub>) δ 7.52 – 7.20 (m, 10H, CH Aromatic), 4.98 (d, *J* = 11.2 Hz, 1H, CHHBn), 4.89 (dd, *J* = 18.4, 11.1 Hz, 2H, CHHBn, CHHBn), 4.67 (d, *J* = 11.0 Hz, 1H, CHHBn), 4.58 (d, *J* = 7.5 Hz, 1H, H-1), 3.86 (dd, *J* = 11.9, 2.9 Hz, 1H, H-6a), 3.76 – 3.53 (m, 3H, H6b, H-4, H-3), 3.52 – 3.37 (m, 2H, H-2, H-5), 1.70 – 1.66 (m, 1H, CH(CH<sub>3</sub>)<sub>2</sub>), 0.95–0.86 (m, 12H, C(CH<sub>3</sub>)<sub>2</sub> and CH(CH<sub>3</sub>)<sub>2</sub>), 0.21 (s, 6H, Si(CH<sub>3</sub>)<sub>2</sub>). <sup>13</sup>C NMR (126 MHz, CDCl<sub>3</sub>) δ 128.0, 97.7, 84.2, 76.8, 76.7, 75.5, 75.2, 75.1, 75.0, 62.3, 34.3, 18.5, -1.9. HRMS: *m/z*: calcd for C<sub>28</sub>H<sub>42</sub>O<sub>6</sub>SiNa: 525.2648; found: 525.2656 [M+Na]<sup>+</sup>.

**Dimethylhexylsilyl *O*-methyl-3,4-*O*-benzyl- $\beta$ -D-glucopyranosyluronate (S2).** Compound **S2** (355 mg, 84%) was prepared according to the general procedure from compound **S1** (400 mg, 0.80 mmol) using TEMPO (30 mg, 0.20 mmol), BAIB (640 mg, 1.99 mmol) and freshly prepared solution of diazomethane in Et<sub>2</sub>O (2 mL). <sup>1</sup>H NMR (600 MHz, CDCl<sub>3</sub>)  $\delta$  7.39 – 7.33 (m, 6H, *CH* Aromatic), 7.37 – 7.27 (m, 5H, *CH* Aromatic), 4.92 (d, *J* = 11.3 Hz, 1H, *CHHBn*), 4.86 – 4.80 (m, 2H, *CHHBn*, *CHHBn*), 4.62 (d, *J* = 11.3 Hz, 1H, *CHHBn*), 4.53 (d, *J* = 7.4 Hz, 1H, H-1), 3.92 – 3.87 (m, 1H, H-5), 3.84 (d, *J* = 8.9 Hz, 1H, H-4), 3.74 – 3.70 (m, 3H, COOCH<sub>3</sub>), 3.59 (t, *J* = 9.0 Hz, 1H, H-3), 3.54 – 3.48 (m, 1H, H-2), 1.55 (d, *J* = 2.8 Hz, 1H, *CH*(CH<sub>3</sub>)<sub>2</sub>), 0.91 – 0.82 (m, 12H, C(CH<sub>3</sub>)<sub>2</sub> and *CH*(CH<sub>3</sub>)<sub>2</sub>), 0.15 (s, 3H, SiCH<sub>3</sub>), 0.17 (s, 3H, SiCH<sub>3</sub>), <sup>13</sup>C NMR (151 MHz, CDCl<sub>3</sub>)  $\delta$  126.7, 126.1, 125.6, 98.0, 82.7, 78.1, 76.93, 74.3, 74.2, 73.4, 56.4, 51.8, 33.1, 29.1, 20.8, 19.6, -0.3. HRMS: *m/z*: calcd for C<sub>29</sub>H<sub>42</sub>O<sub>7</sub>SiNa: 553.2597; found: 553.2609 [M+Na]<sup>+</sup>.

**Methyl-2-*O*-acetyl-3,4-*O*-benzyl- $\alpha/\beta$ -D-glucopyranosyluronate (S3).** A solution of compound **S2** (90 mg, 0.17 mmol) in a mixture of pyridine and acetic anhydride (4/1, v/v, 0.20 M) was stirred for 2 hr at ambient temperature. The mixture was co-evaporated with toluene *in vacuo* and dried on the membrane pump for 3 hours. To a stirred solution of the resulting crude material in THF (2 mL), 30% HF in pyridine (340  $\mu$ L) was added. After stirring at ambient temperature for 18 h, TLC analysis (hexanes/EtOAc, 60/40, v/v) indicated complete consumption of the starting material. The reaction mixture was subsequently diluted with DCM (10 mL), washed with water, NaHCO<sub>3</sub> (sat.), and brine. The organic phase was dried (MgSO<sub>4</sub>), filtered, and the filtrate was concentrated under reduced pressure and the residue was purified by silica gel column chromatography using a gradient of hexanes/EtOAc (2/1  $\rightarrow$  1/1, v/v) to give compound **S3** as oil (57 mg, 79%). <sup>1</sup>H NMR (500 MHz, CDCl<sub>3</sub>)  $\delta$  7.39 – 7.25 (m, 10H, *CH* Aromatic), 5.50 (d, *J* = 3.6 Hz, 1H, H-1), 4.97 – 4.71 (m, 5H, H-2, 3  $\times$  *CHHBn*), 4.66 (d, *J* = 10.9 Hz, 1H, *CHHBn*), 4.53 (d, *J* = 9.3 Hz, 1H, H-5), 4.09 (t, *J* = 8.5 Hz, 1H, H-3), 3.88 (t, *J* = 8.0 Hz, 1H, H-4), 3.76 (s, 3H, COOCH<sub>3</sub>), 2.05 (d, *J* = 9.4 Hz, 3H, COCH<sub>3</sub>). <sup>13</sup>C NMR (126 MHz, CDCl<sub>3</sub>)  $\delta$  129.8, 128.4, 128.3, 127.7, 90.8, 79.2, 78.7, 75.4, 75.0, 74.5, 72.9, 70.6, 51.9, 21.5. HRMS: *m/z*: calcd for C<sub>23</sub>H<sub>26</sub>O<sub>8</sub>Na: 453.1525; found: 453.1533 [M+Na]<sup>+</sup>.

**Dimethylhexylsilyl O-methyl-2-O-levulinoyl-3,4-O-benzyl-β-D-glucopyranosyluronate (S4).** A suspension of DCC (117 mg, 0.57 mmol) and DMAP (1 mg, 0.01 mmol) was added to a solution of compound **S2** (100 mg, 0.19 mmol) and levulinic acid (39 μL, 0.38 mmol) in DCM (1 mL) at 0 °C. After stirring for 6 h at ambient temperature, TLC analysis (hexanes/EtOAc, 70/30, v/v) indicated the consumption of the starting material. The mixture was filtered over pad of Celite and the filtrate was concentrated under reduced pressure. The residue was purified by silica gel column chromatography using a gradient of hexanes/EtOAc (3/1 → 1/1, v/v) to give compound **S4** as oil (105 mg, 89%). <sup>1</sup>H NMR (500 MHz, CDCl<sub>3</sub>) δ 7.35 – 7.24 (m, 11H, CH Aromatic), 4.99 (t, *J* = 9.3, 7.2 Hz, 1H, H-2), 4.79 (dd, *J* = 11.5, 5.2 Hz, 2H, CHHBn, CHHBn), 4.75 – 4.61 (m, 3H, H-1, CH<sub>2</sub>Bn), 3.98 – 3.90 (m, 2H, H-4, H-5), 3.75 (s, 3H, COOCH<sub>3</sub>), 3.68 (t, *J* = 8.4 Hz, 1H, H-3), 2.68 (dt, *J* = 17.5, 6.8 Hz, 2H, CH<sub>2</sub> Lev), 2.49 (t, *J* = 6.8 Hz, 2H, CH<sub>2</sub> Lev), 2.17 (s, 3H, CH<sub>3</sub> Lev), 1.31 (s, 1H, CH(CH<sub>3</sub>)<sub>2</sub>), 0.88 – 0.81 (m, 12H, C(CH<sub>3</sub>)<sub>2</sub> and CH(CH<sub>3</sub>)<sub>2</sub>), 0.17 (s, 3H, SiCH<sub>3</sub>), 0.13 (s, 3H, SiCH<sub>3</sub>). <sup>13</sup>C NMR (151 MHz, CDCl<sub>3</sub>) δ 128.2, 127.9, 127.8, 127.7, 96.1, 82.0, 79.0, 74.9, 74.8, 74.5, 37.7, 30.0, 29.4, 27.8, 19.0, 1.3. HRMS: *m/z*: calcd for C<sub>34</sub>H<sub>48</sub>O<sub>9</sub>SiNa: 651.2965; found: 651.2972 [M+Na]<sup>+</sup>.

**Dimethylhexylsilyl O-methyl-2-O-(4-acetoxy-2,2-dimethylbutanoate)-3,4-O-benzyl-β-D-glucopyranosyluronate (S5).** To a stirring solution of compound **S2** (100 mg, 0.19 mmol) in pyridine (1 mL), DMAP (30 mg, 0.19 mmol) and 4-acetoxy-2,2-dimethyl butanoyl chloride (45 μL, 0.38 mmol) was added at 0 °C. After stirring for 4hr at ambient temperature, TLC analysis (hexanes/EtOAc, 70/30, v/v) indicated the total consumption of the starting material, after which the reaction mixture was diluted with EtOAc (10 mL) and washed with aqueous NaHCO<sub>3</sub> (10%), H<sub>2</sub>O, brine, dried (MgSO<sub>4</sub>), filtered and the filtrate was concentrated under reduced pressure. The mixture was concentrated under reduced pressure and was purified by silica gel column chromatography using a gradient of hexanes/EtOAc (4/1 → 1/1, v/v) to compound **S5** as oil (114 mg, 88%). <sup>1</sup>H NMR (600 MHz, CDCl<sub>3</sub>) δ 7.36 – 7.14 (m, 10H, CH Aromatic), 5.06 – 4.92 (m, 1H, H-2), 4.85 – 4.59 (m, 5H, 4 × CHHBn, H-1), 4.12 – 4.04 (t, 2H, CH<sub>2</sub> PivOAc), 3.75 – 3.66 (m, 4H, COOCH<sub>3</sub>, H-4), 3.46 – 3.40 (t, *J* = 8.5 Hz, 1H, H-3), 1.98 – 1.93 (m, 3H, CH<sub>3</sub> PivOAc), 1.85 (t, *J* = 7.7, 2H, CH<sub>2</sub> PivOAc), 1.61 (m, 1H, CH(CH<sub>3</sub>)<sub>2</sub>), 1.18 (d, *J* = 4.7 Hz, 6H, 2xCH<sub>3</sub> PivOAc), 0.88 – 0.81 (m, 12H, C(CH<sub>3</sub>)<sub>2</sub> and CH(CH<sub>3</sub>)<sub>2</sub>), 0.18 – 0.11 (m, 6H, Si(CH<sub>3</sub>)<sub>2</sub>). <sup>13</sup>C NMR (151 MHz, CDCl<sub>3</sub>) δ 128.4, 128.2, 127.7, 127.5, 127.4, 95.9, 82.6, 77.6, 75.3, 75.2, 74.7,

74.4, 61.2, 52.3, 38.0, 33.7, 25.2, 20.9, 19.7. HRMS: m/z: calcd for C<sub>37</sub>H<sub>54</sub>O<sub>10</sub>SiNa: 709.3384; found: 709.3390 [M+Na]<sup>+</sup>.

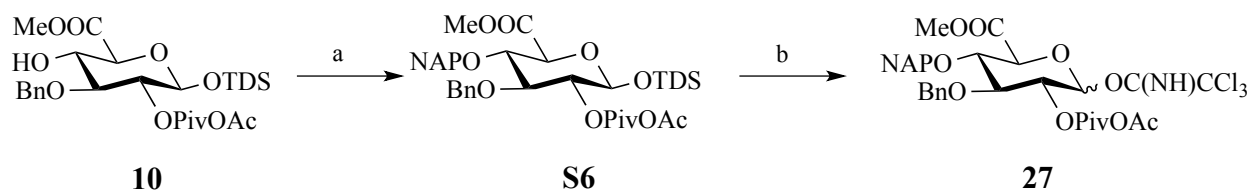

**Scheme S2.** Synthesis of glucuronic donor with C-4 2-naphthylmethyl ether. Reagents and conditions: a) 2-naphthylmethyl bromide, NaH, TBAI, DMF, -20 °C (70%); b) (i) HF:Pyr. THF; (ii) Cl<sub>3</sub>CCN, NaH, DCM.

**Dimethylhexylsilyl O-methyl-2-O-(4-acetoxy-2,2-dimethylbunoate)-3-O-benzyl-4-O-(2-methyl-naphthyl)-β-L-glucopyranosyluronate (S6).** To stirring solution of compound **10** (300 mg, 0.50 mmol) in DMF (5 mL), 2-naphthylmethyl bromide (277 mg, 1.26 mmol) TBAI (2 mg, 0.01 mmol) and NaH (12 mg, 0.50 mmol) were added at -20 °C. After stirring for 30 min at -20 °C, TLC analysis (hexanes/EtOAc, 80/20, v/v) indicated total consumption of starting material. The reaction mixture was quenched with MeOH and was concentrated under reduced pressure. The residue was purified by silica gel column chromatography using a gradient of hexanes/EtOAc (5/1 → 1/1, v/v) to give compound **S6** as oil (259 mg, 70%). <sup>1</sup>H NMR (300 MHz, CDCl<sub>3</sub>) δ 7.77 – 7.05 (m, 12H, CH Aromatic), 4.91 (t, *J* = 8.5, 1H, H-2), 4.64 (m, *J* = 11.1 Hz, 6H, CH<sub>2</sub>NAP, 3 × CHHBn, H-1), 4.02 – 3.80 (m, 4H, H-4, H-5, CH<sub>2</sub> PivOAc), 3.65 – 3.51 (m, 4H, H-3, COOCH<sub>3</sub>), 1.83 (d, *J* = 1.5 Hz, 3H, CH<sub>3</sub> PivOAc), 1.73 (dd, *J* = 8.0, 6.3 Hz, 2H, CH<sub>2</sub> PivOAc), 1.57 – 1.38 (m, 1H, CH(CH<sub>3</sub>)<sub>2</sub>), 1.06 (s, 4H, 2 × CH<sub>2</sub> PivOAc), 0.79 – 0.61 (m, 12H, C(CH<sub>3</sub>)<sub>2</sub> and CH(CH<sub>3</sub>)<sub>2</sub>), 0.09 – 0.06 (m, 6H, Si(CH<sub>3</sub>)<sub>2</sub>). <sup>13</sup>C NMR (126 MHz, CDCl<sub>3</sub>) δ 128.3, 127.9, 127.1, 127.0, 126.7, 125.9, 125.8, 96.1, 82.3, 78.9, 74.9, 74.8, 74.4, 74.3, 61.3, 52.4, 38.0, 33.8, 26.0, 25.3, 25.2, 24.7, 24.1, 20.9, 19.9, 18.6. HRMS: m/z: calcd for C<sub>41</sub>H<sub>56</sub>O<sub>10</sub>SiNa: 759.3540; found: 759.3546 [M+Na]<sup>+</sup>.

CDCl<sub>3</sub>

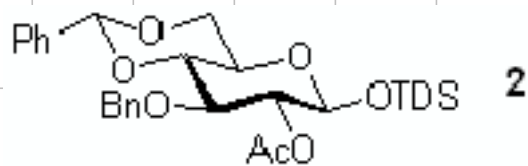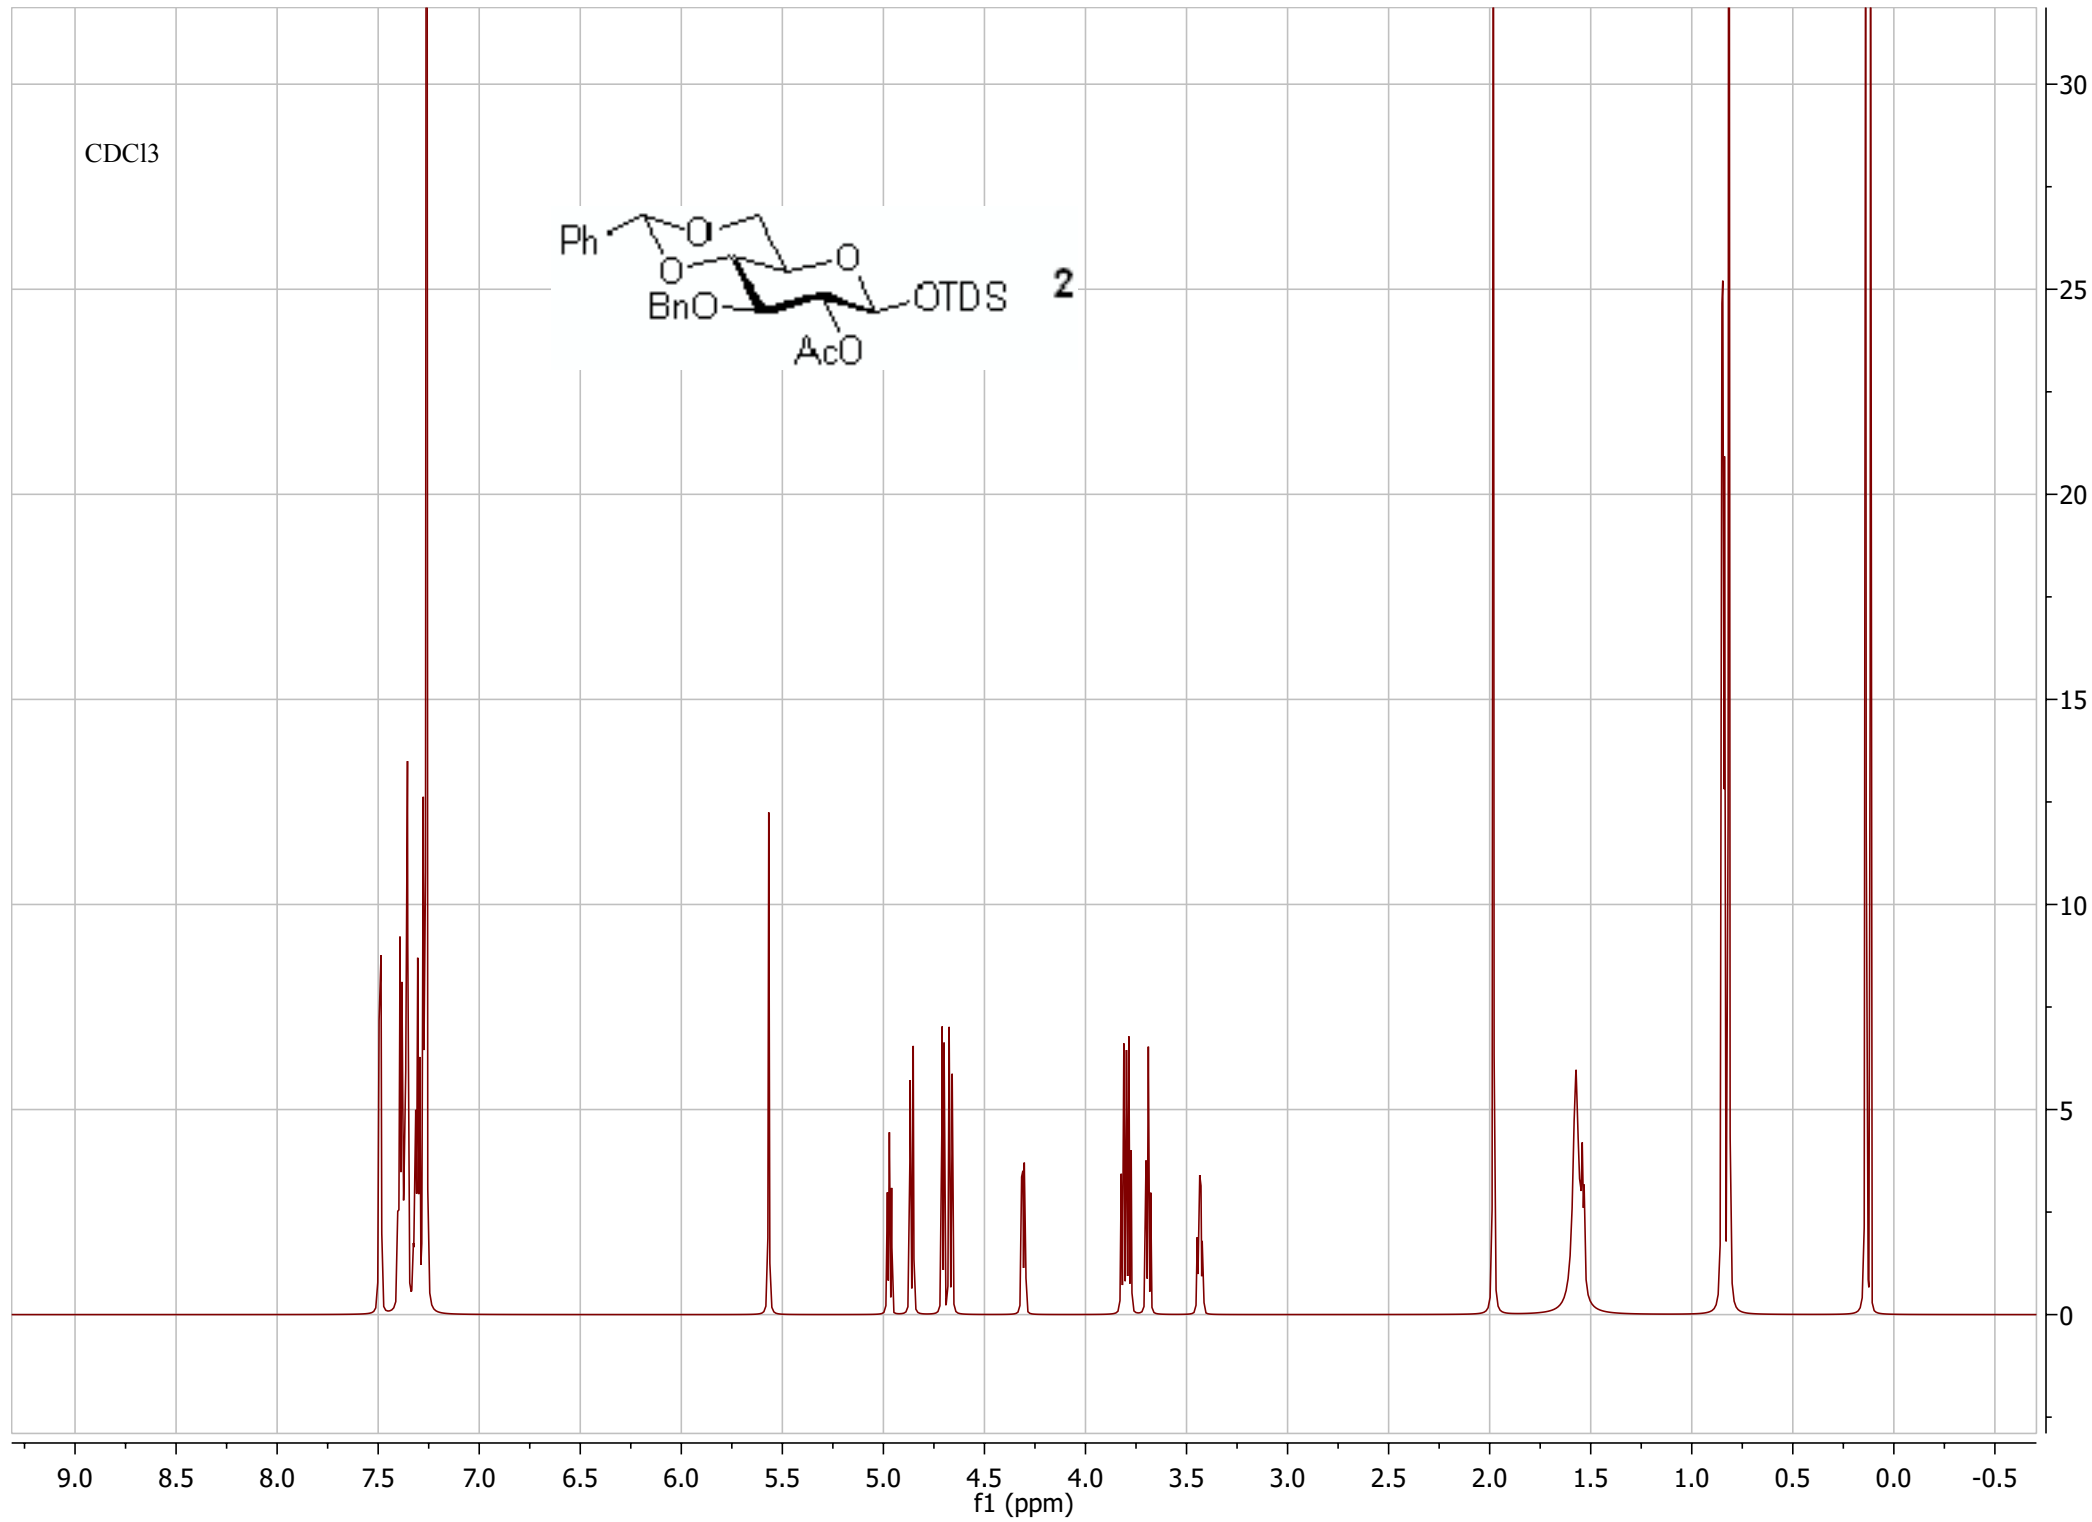

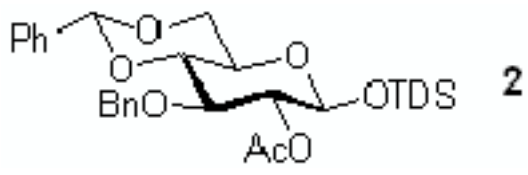

CDCl<sub>3</sub>

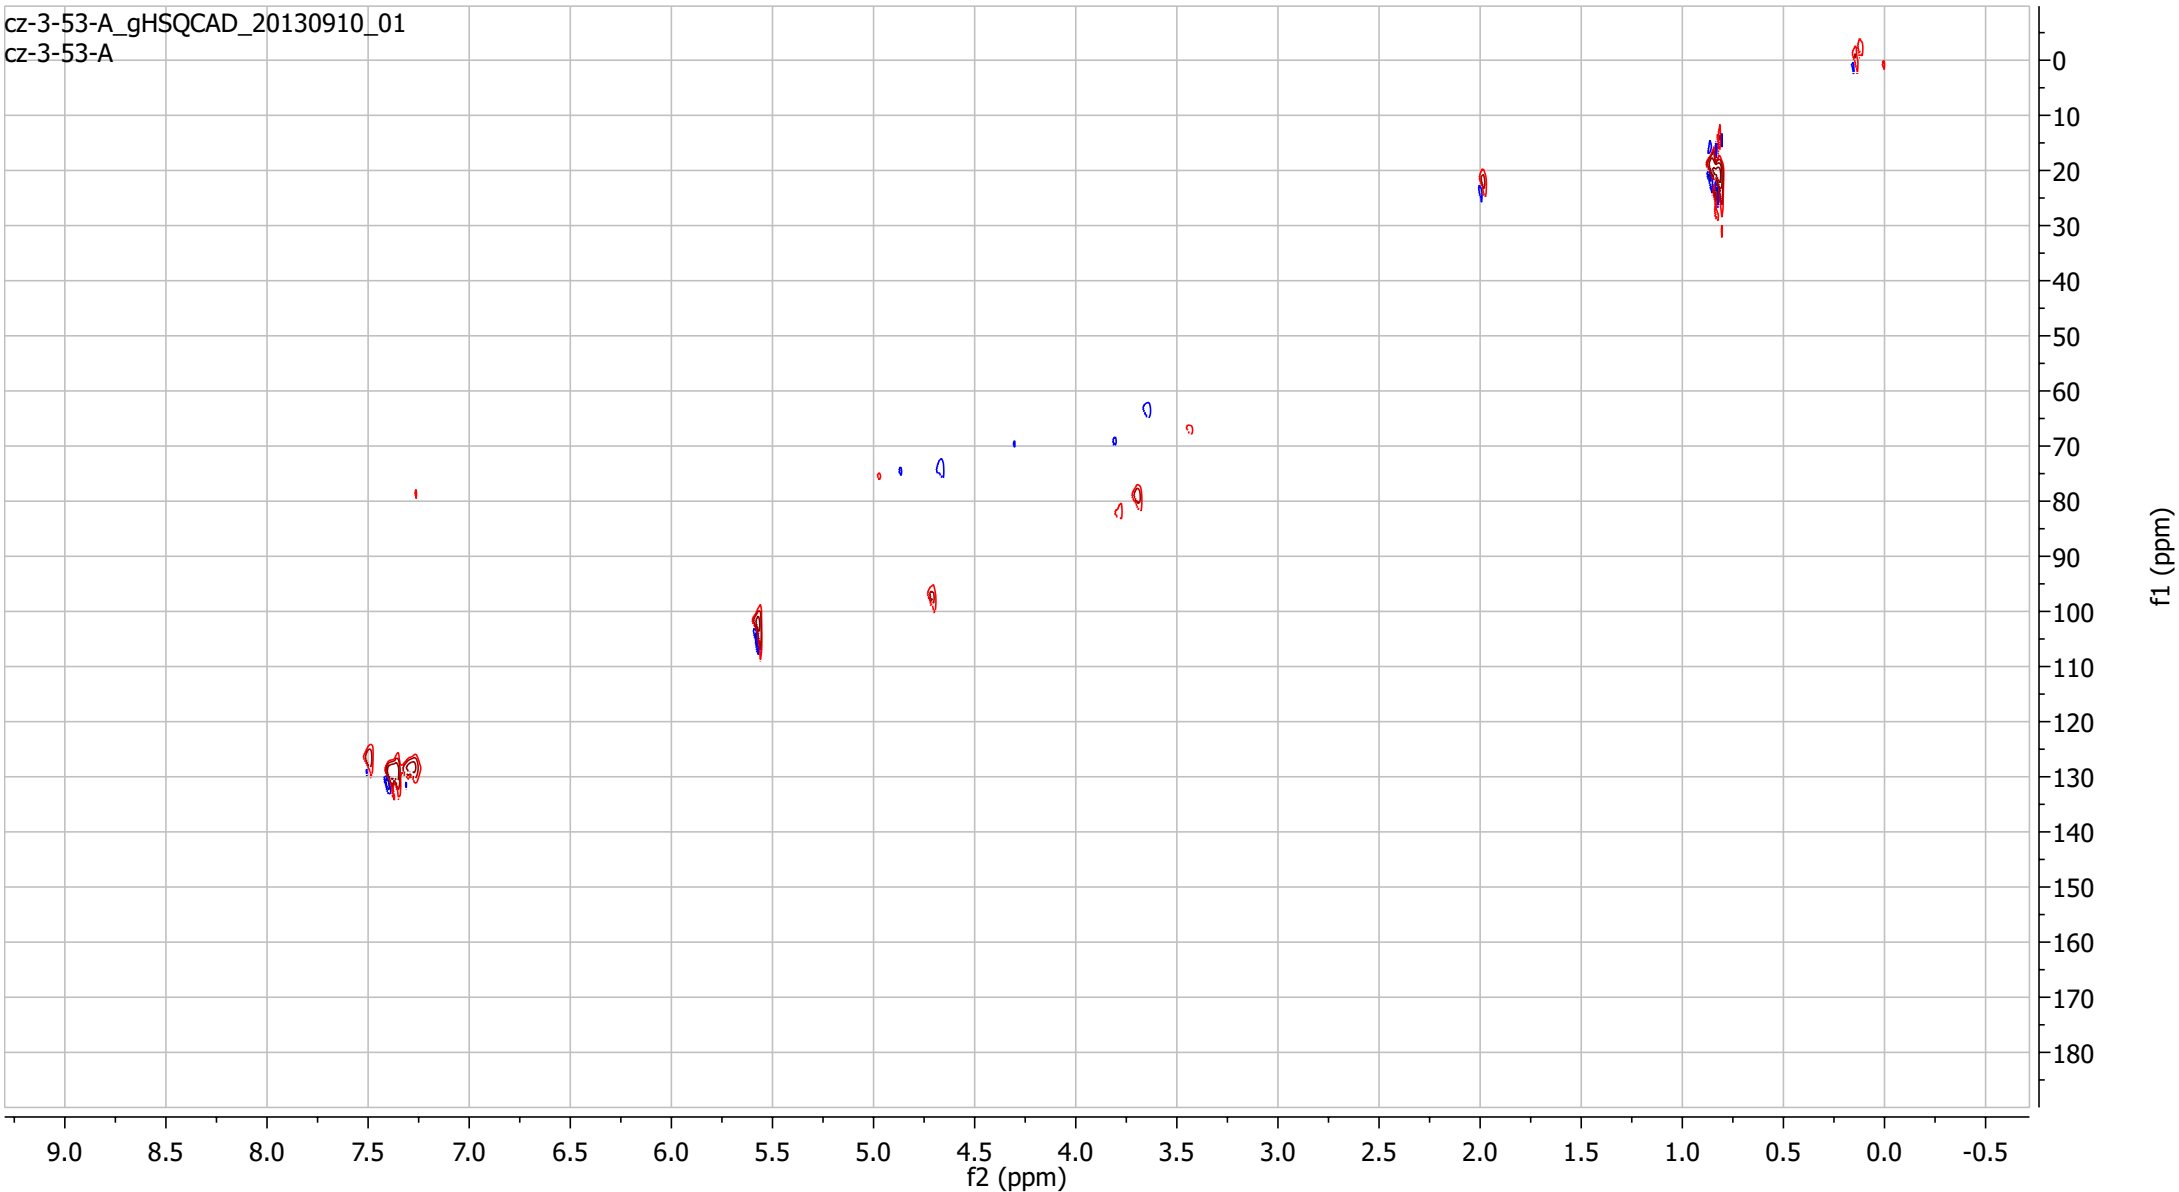



CDCl<sub>3</sub>

3

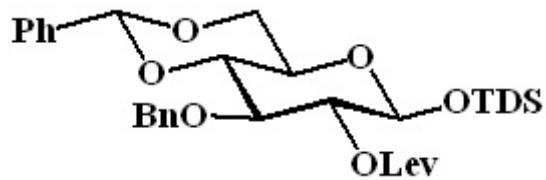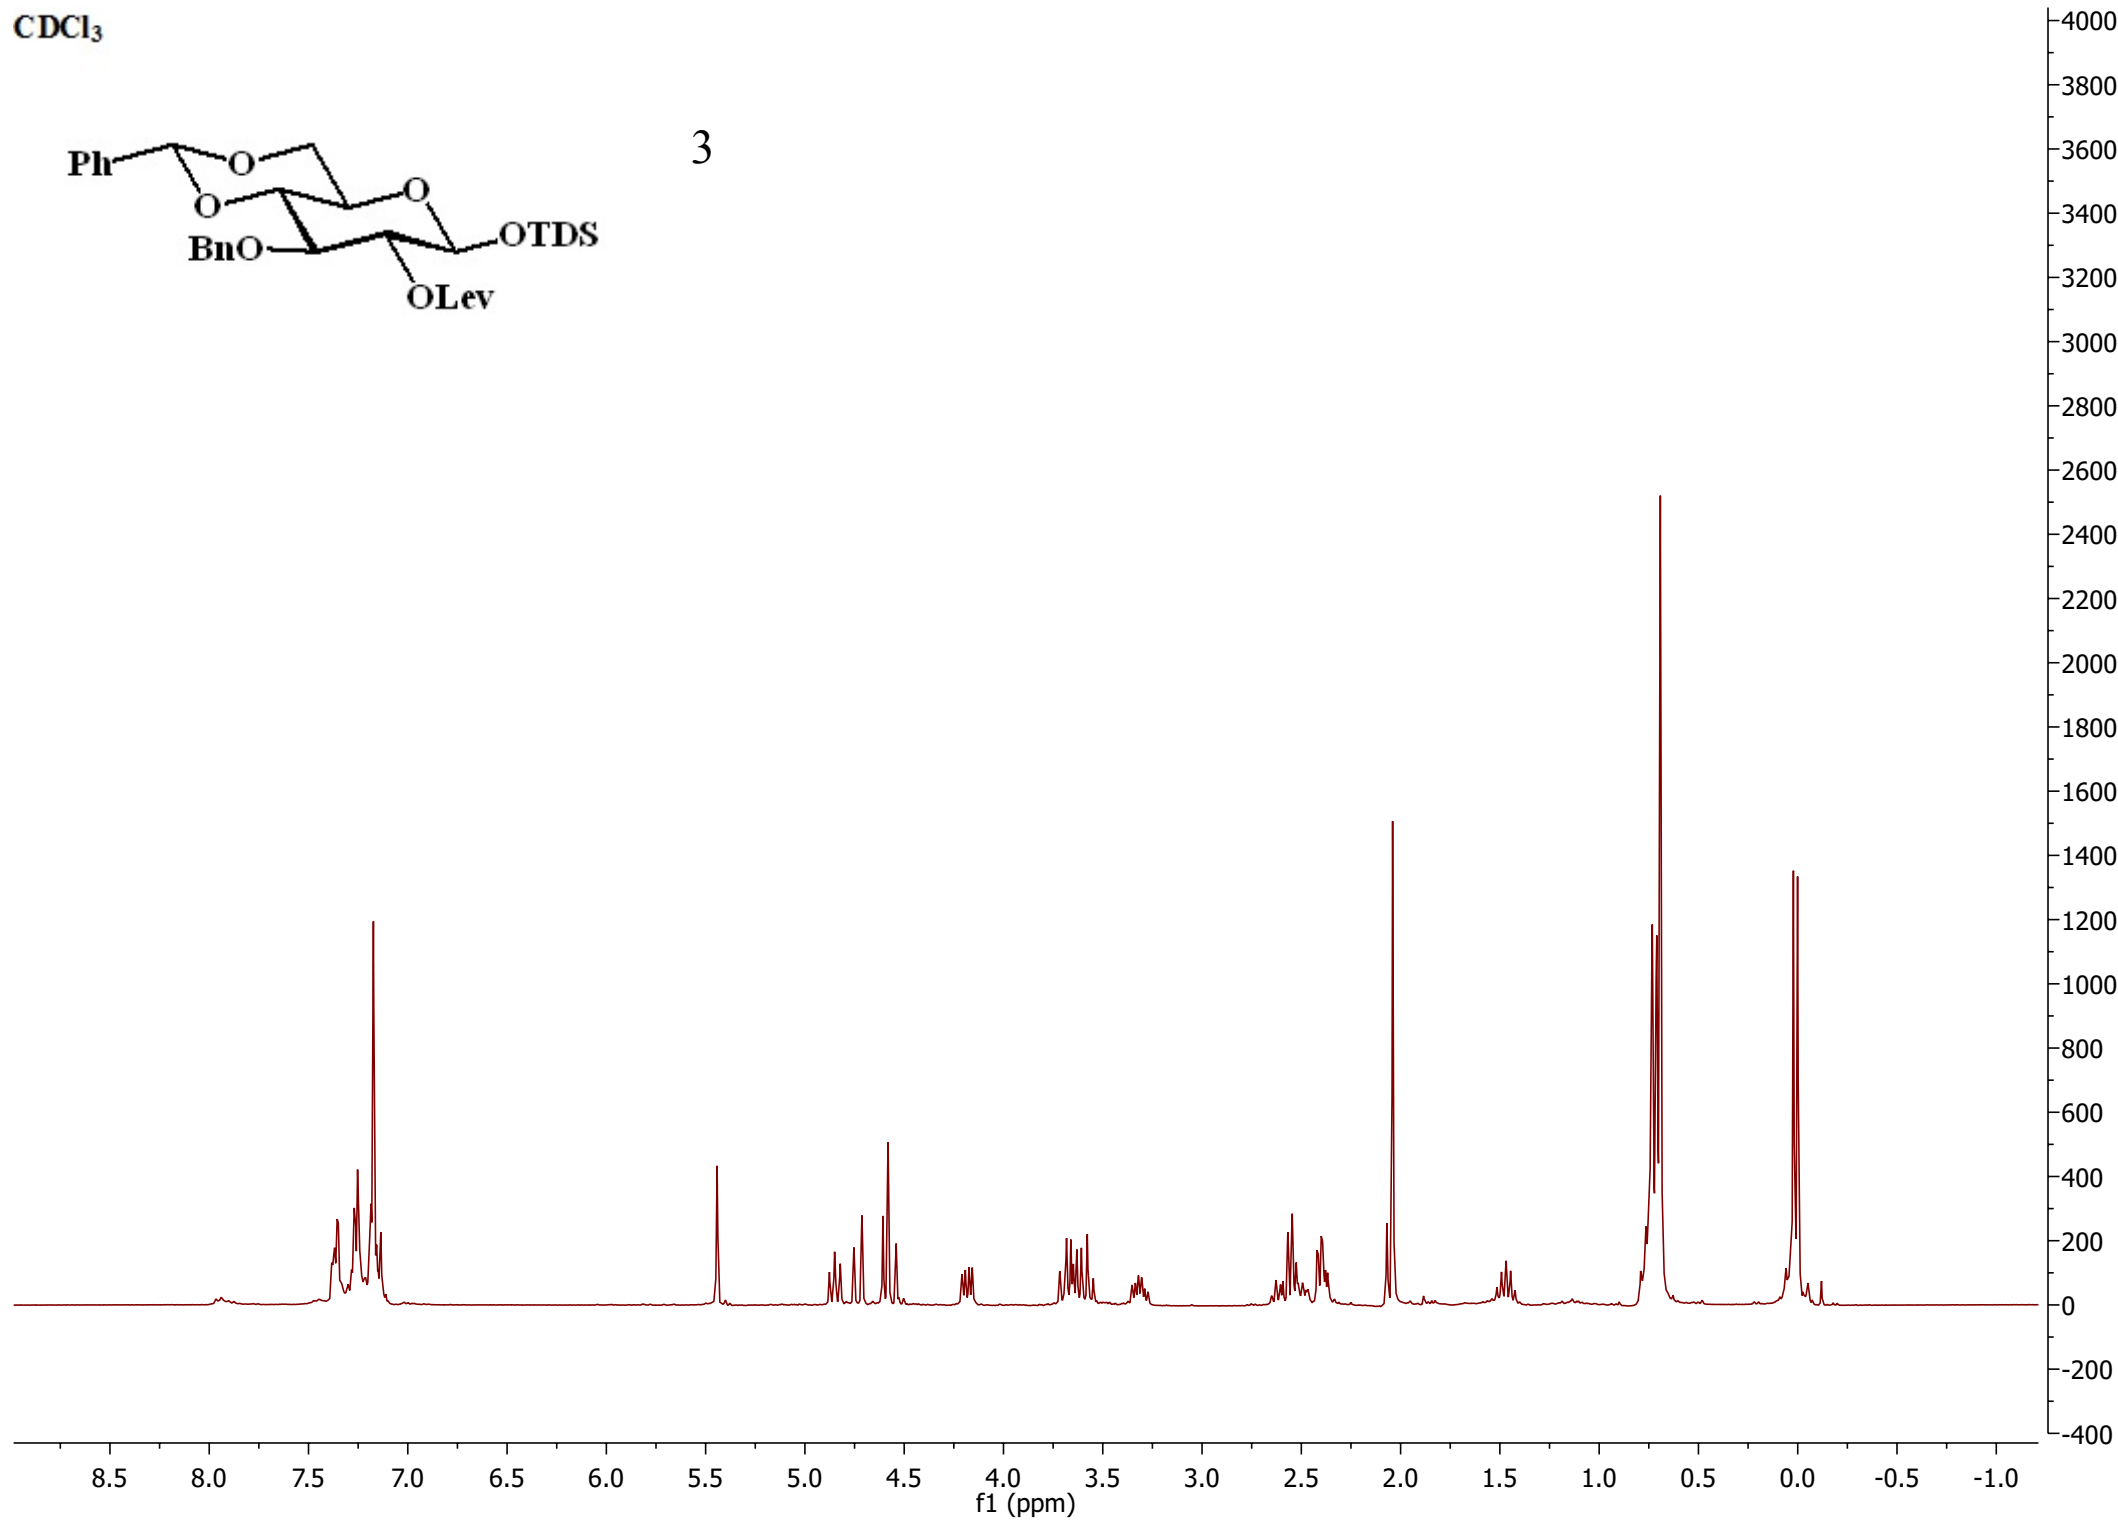

$\text{CDCl}_3$

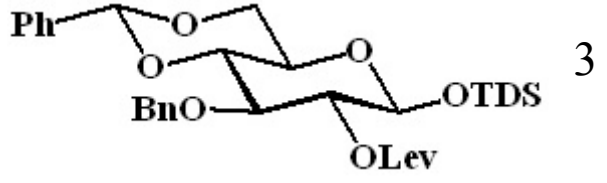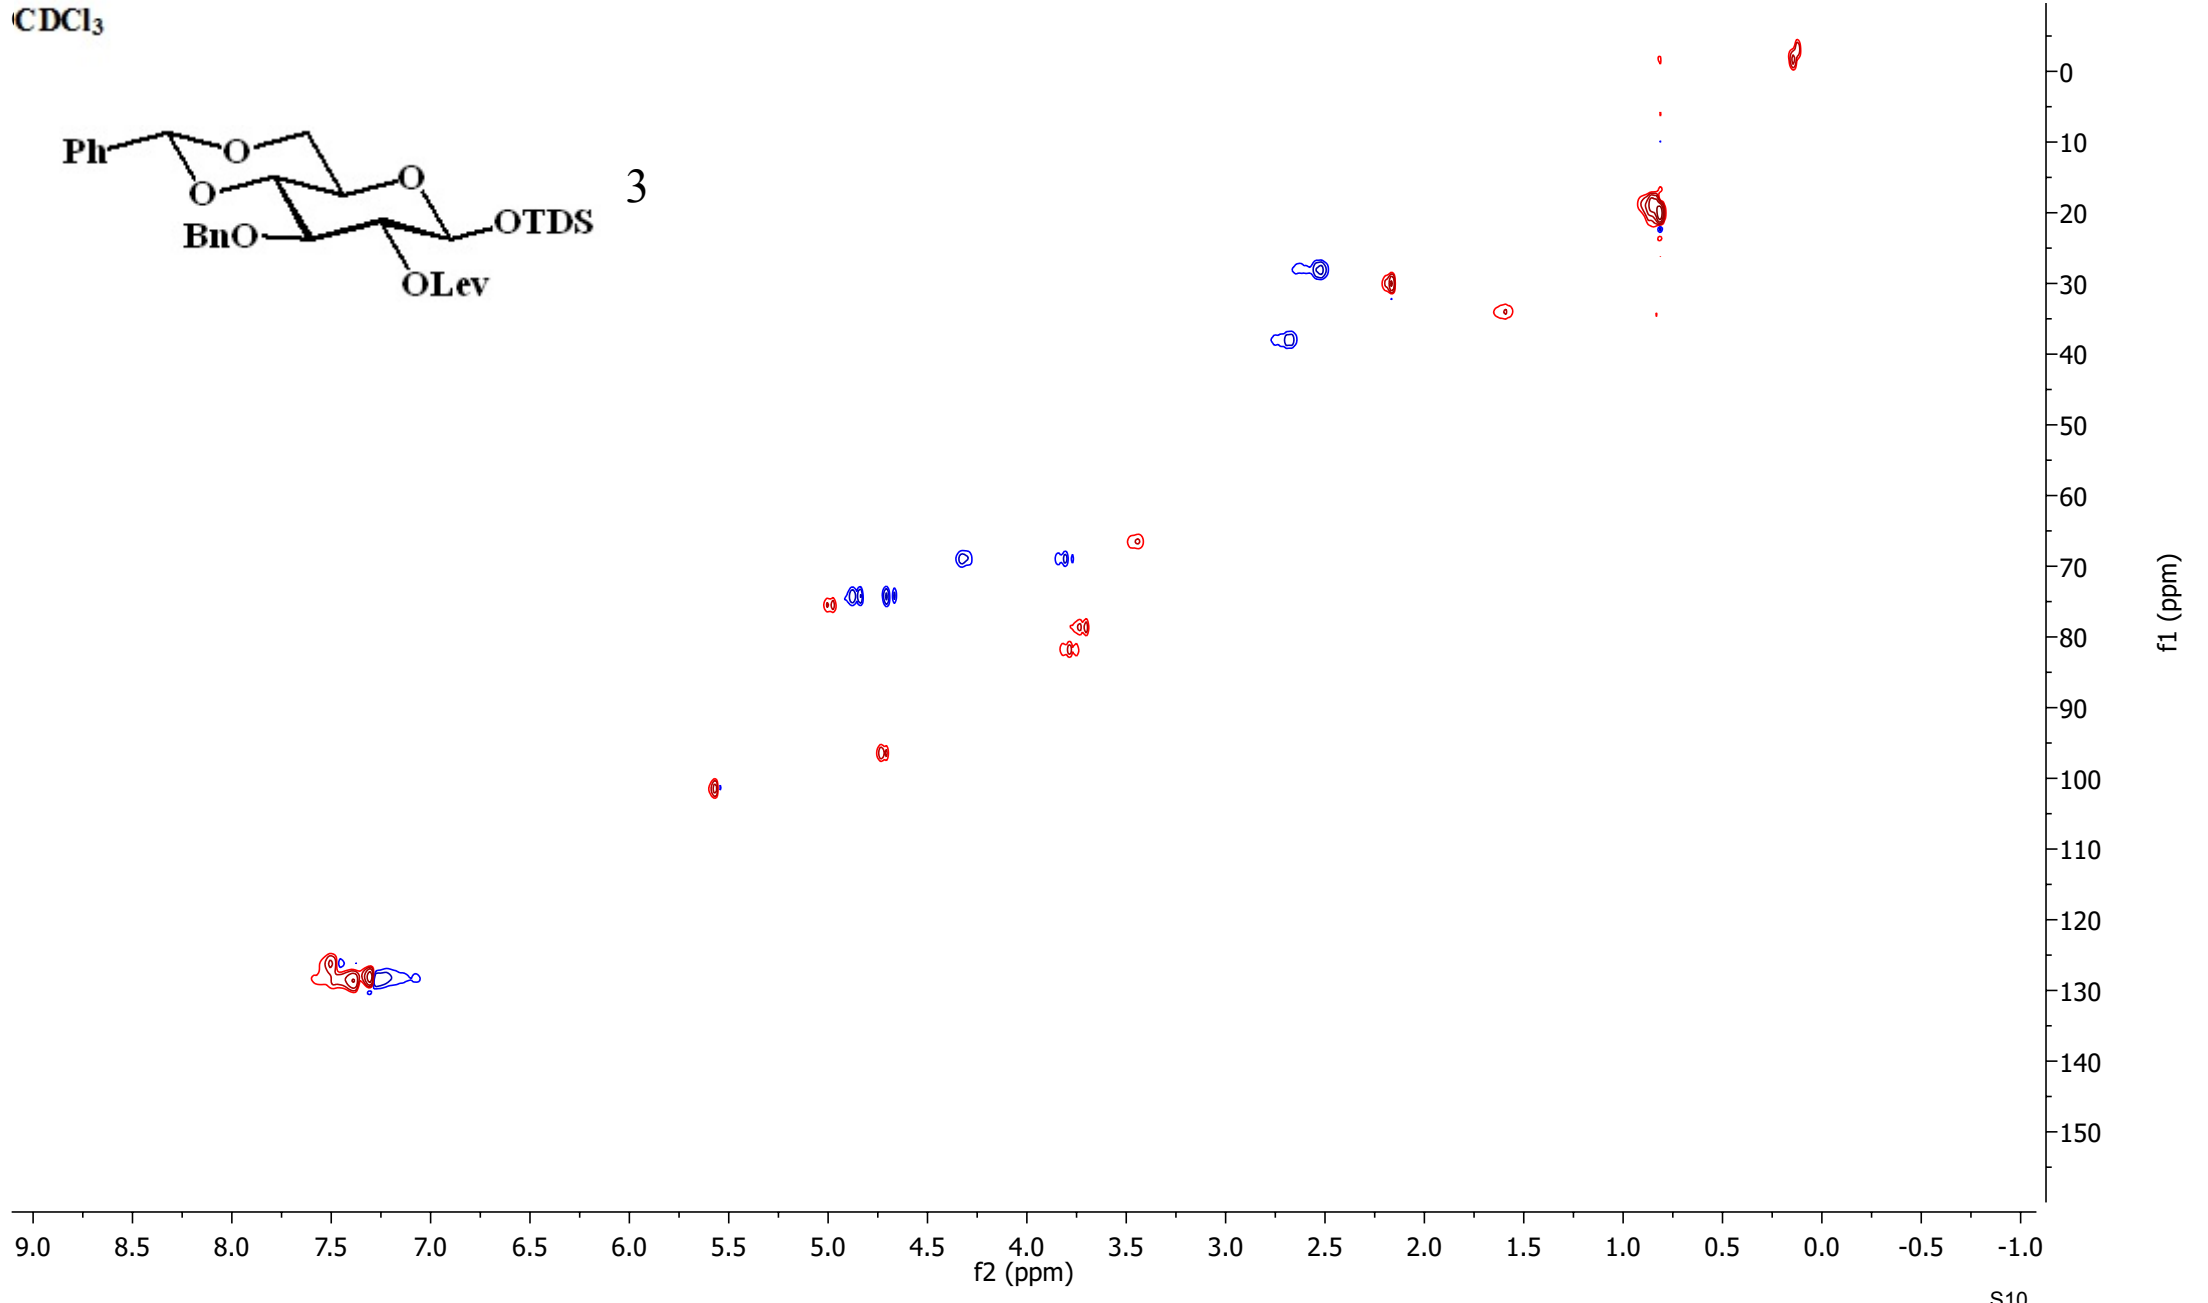

CDCl<sub>3</sub>

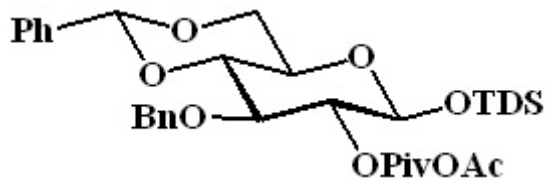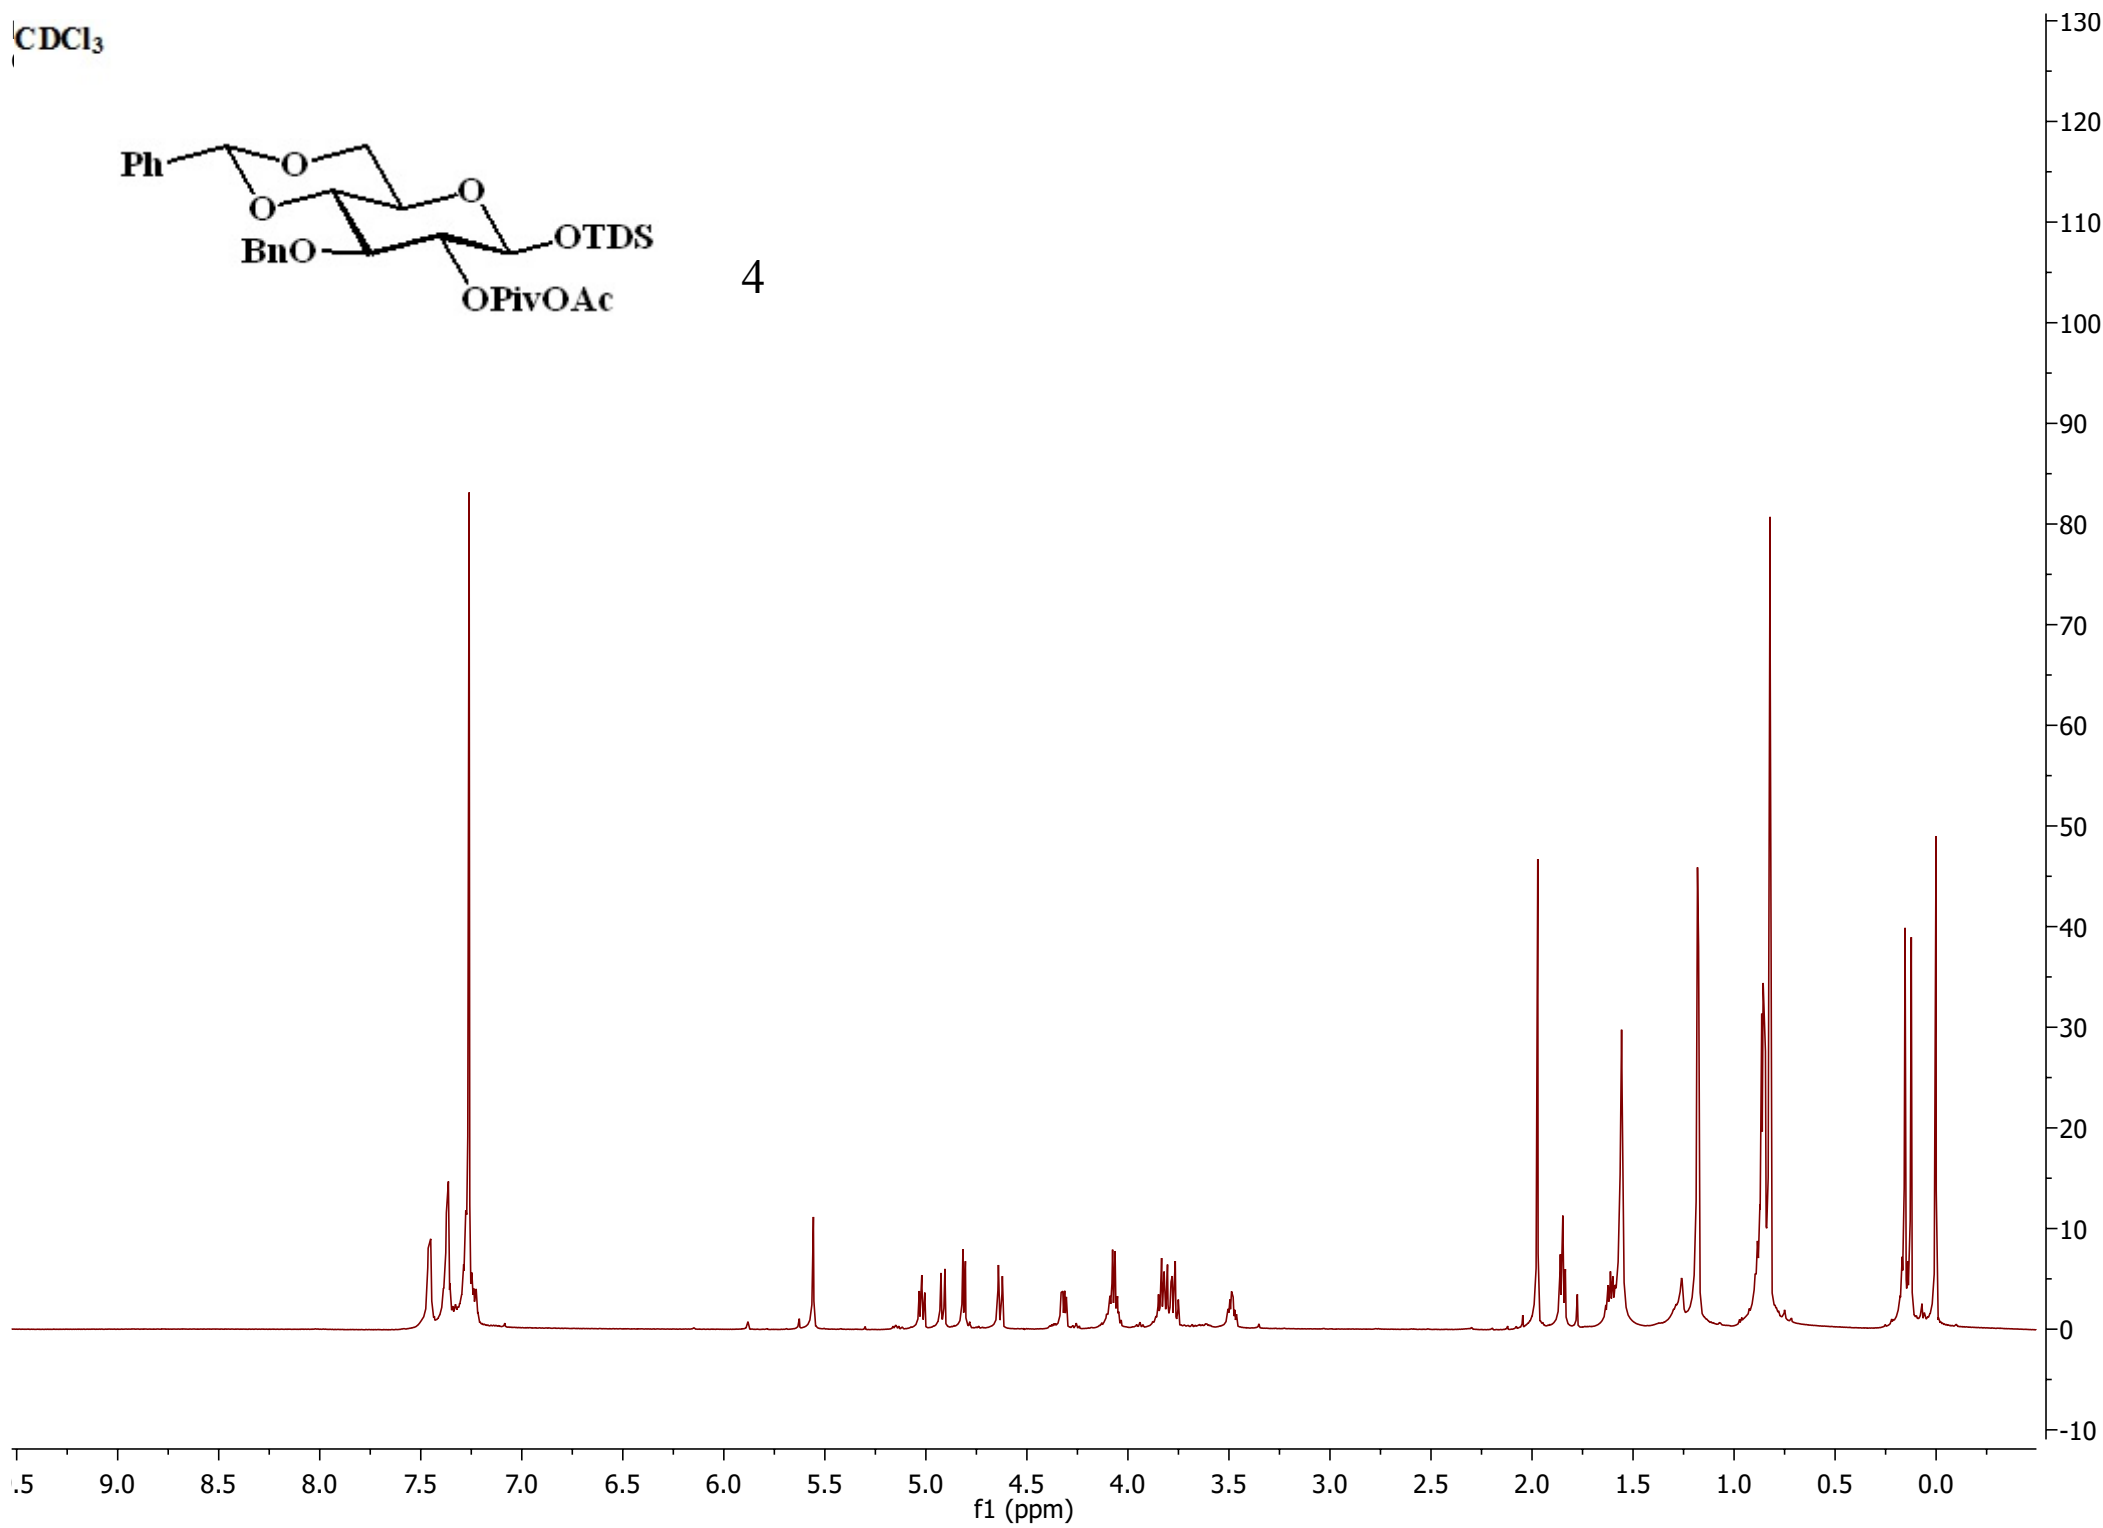

CDCl<sub>3</sub>

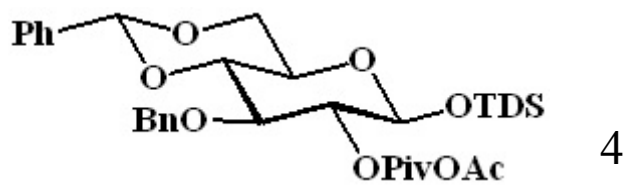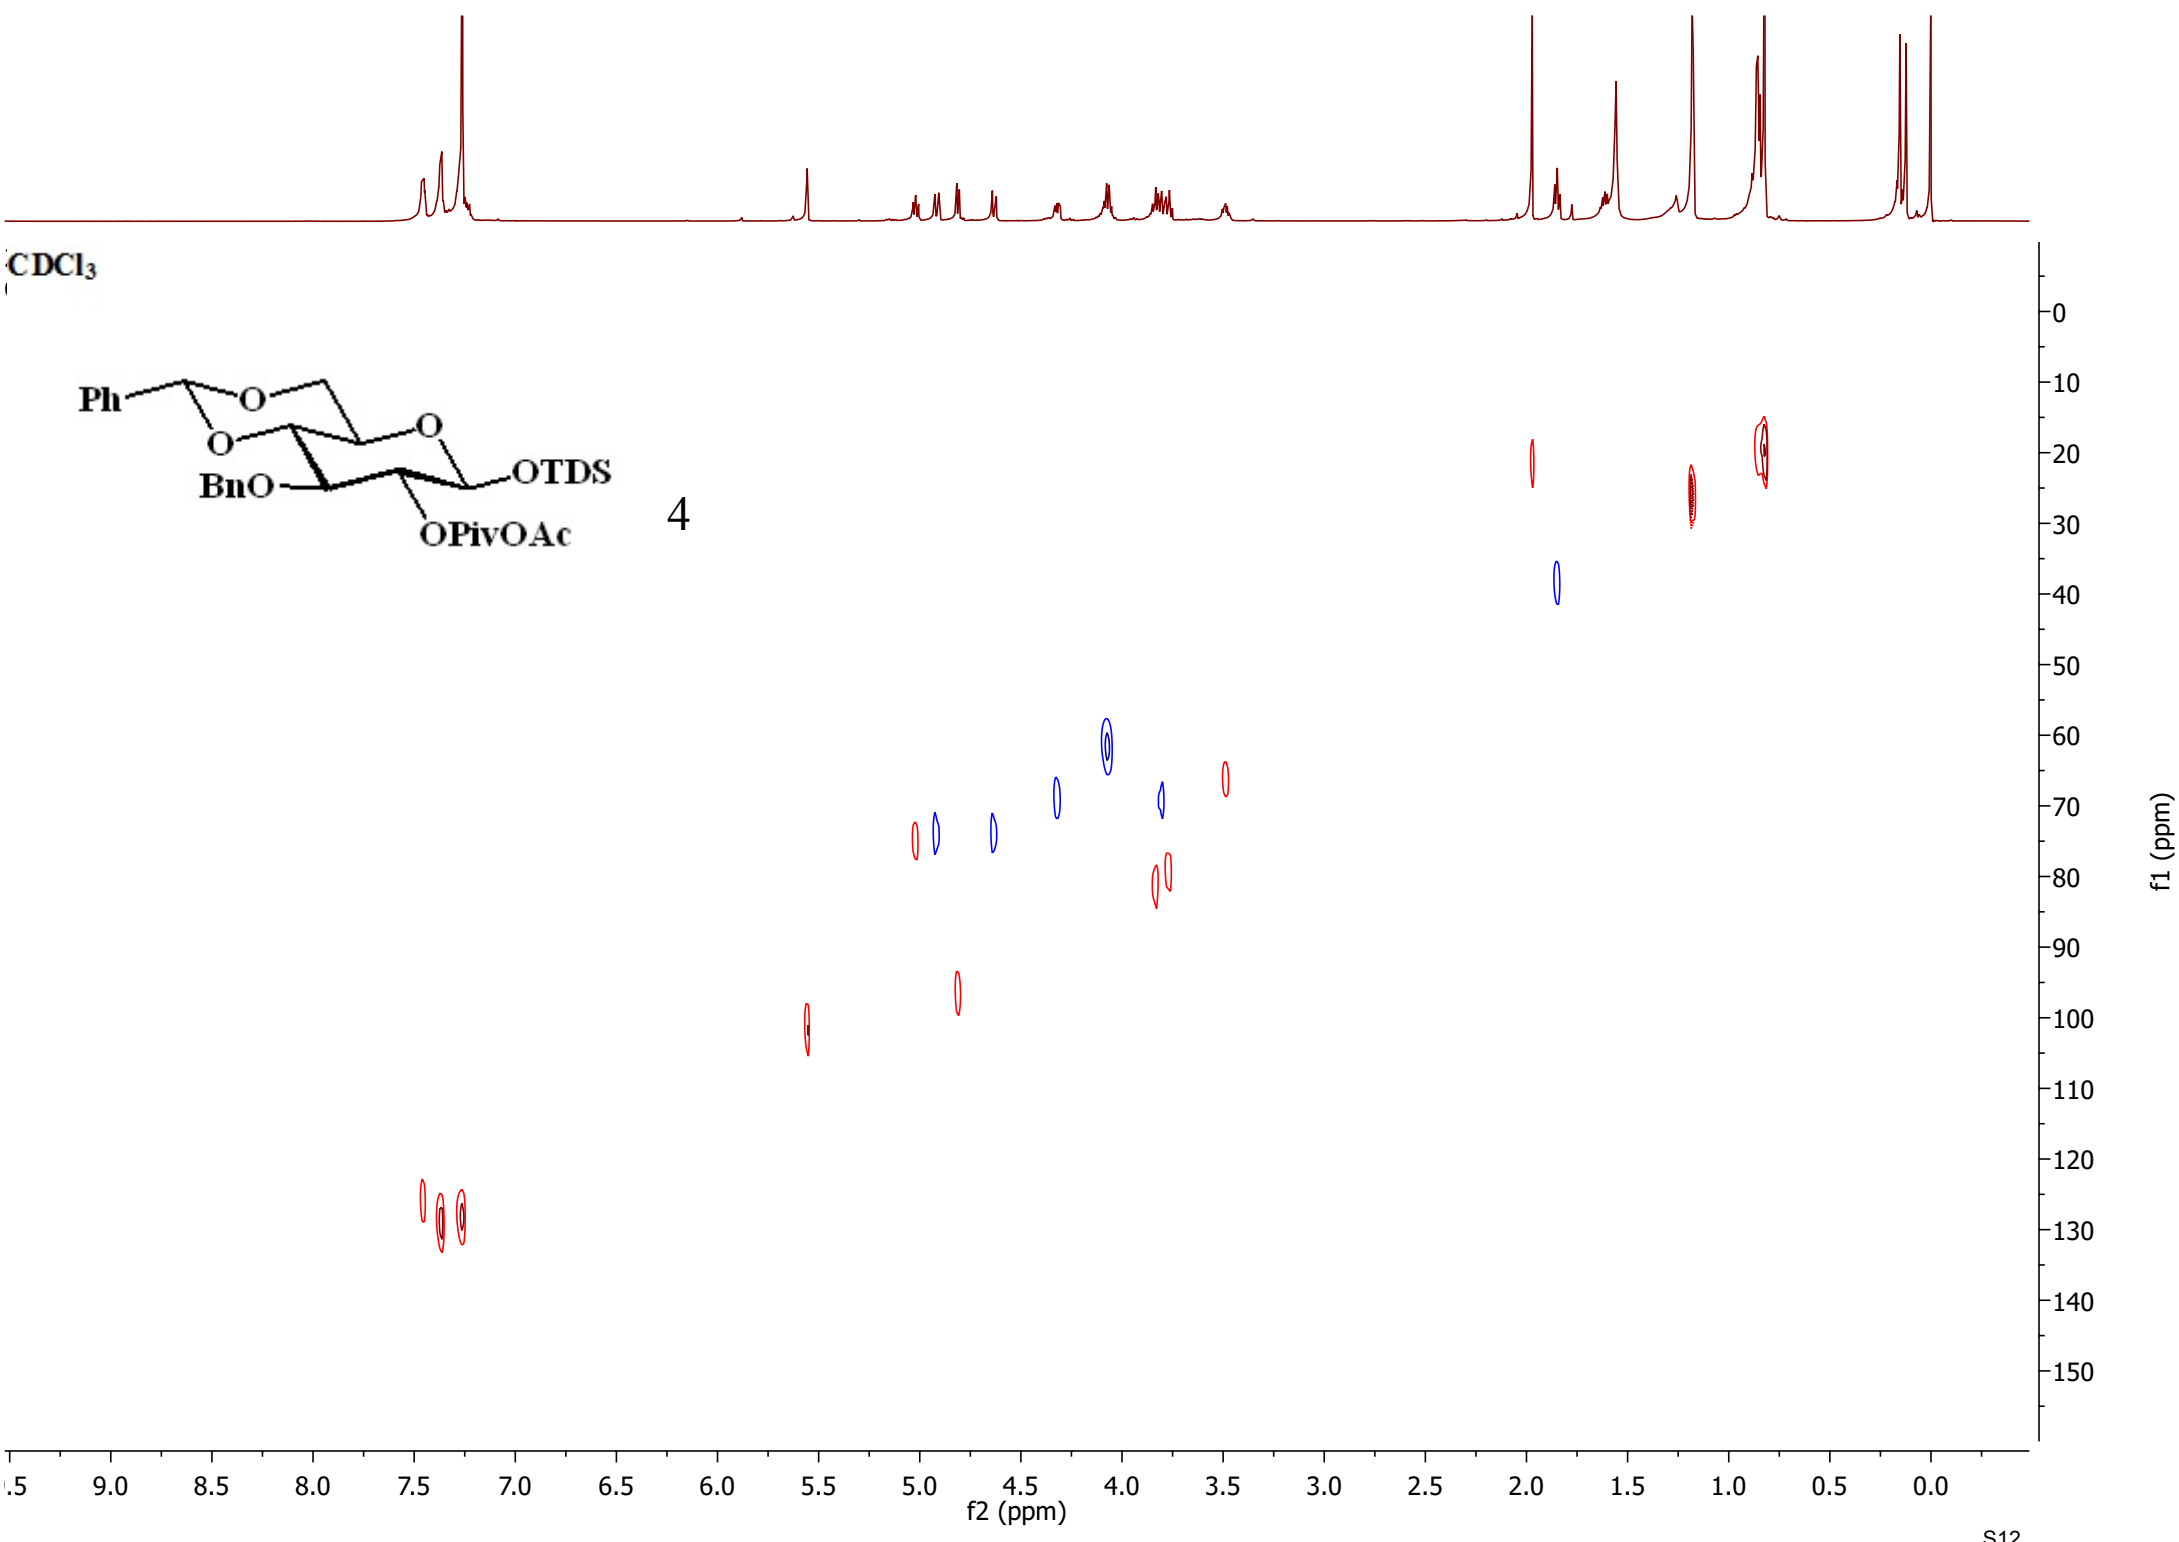

CDCl<sub>3</sub>

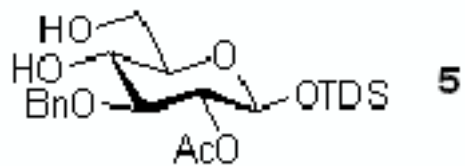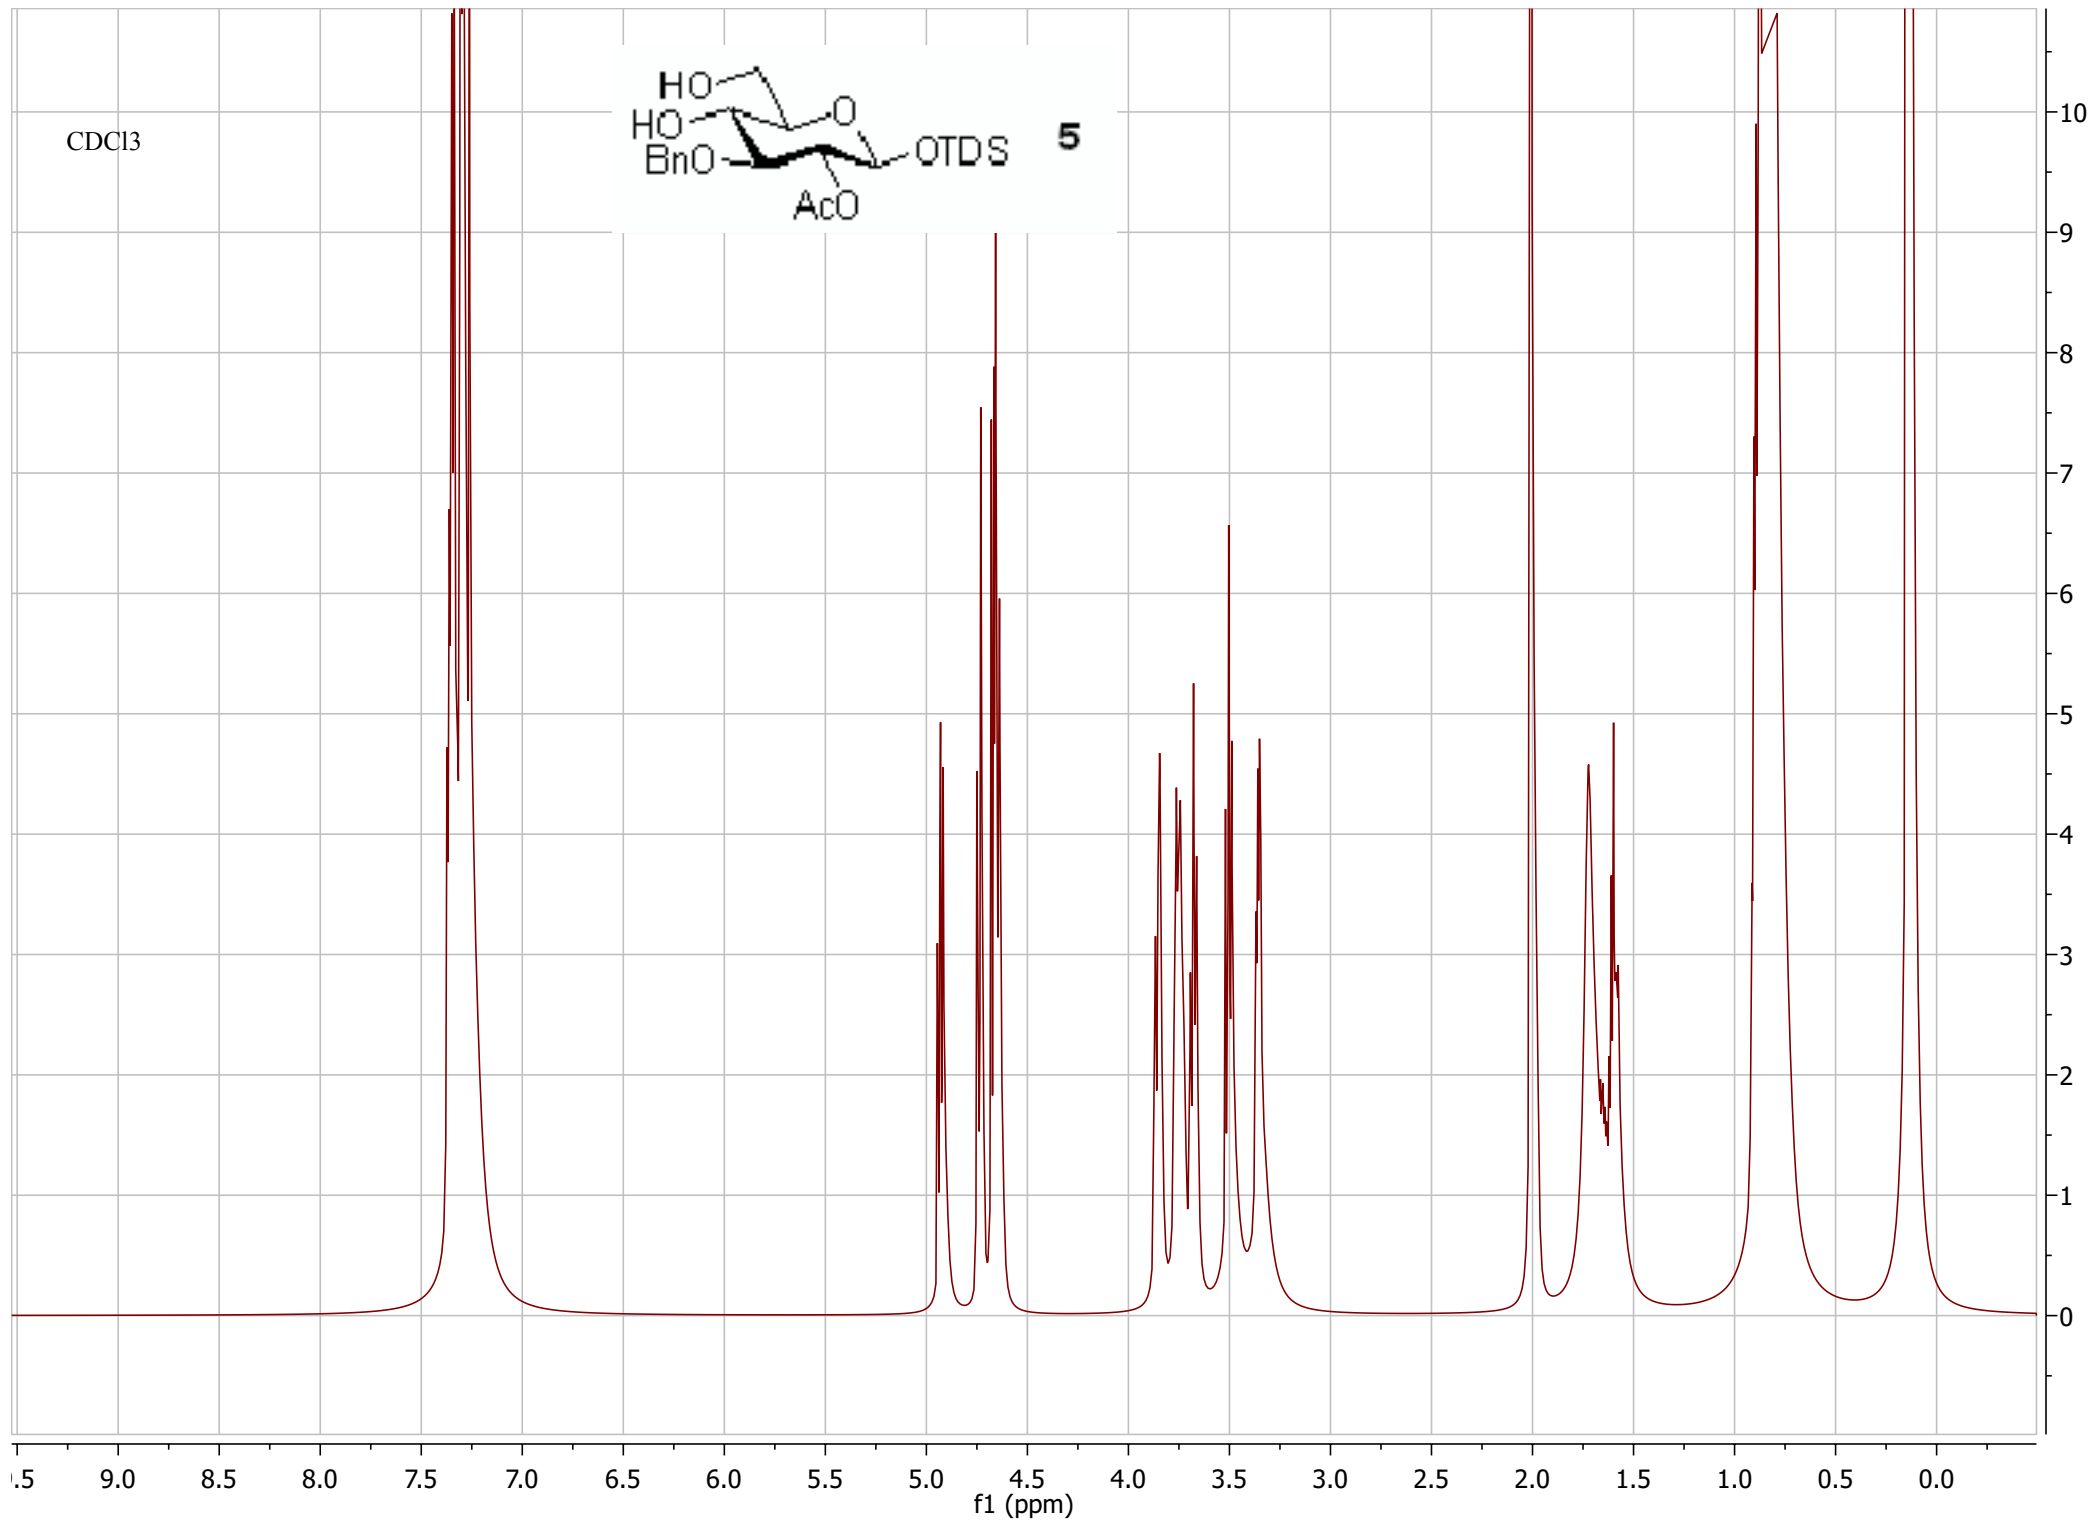

CDCl3

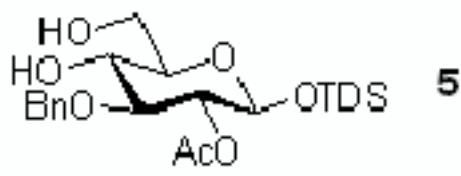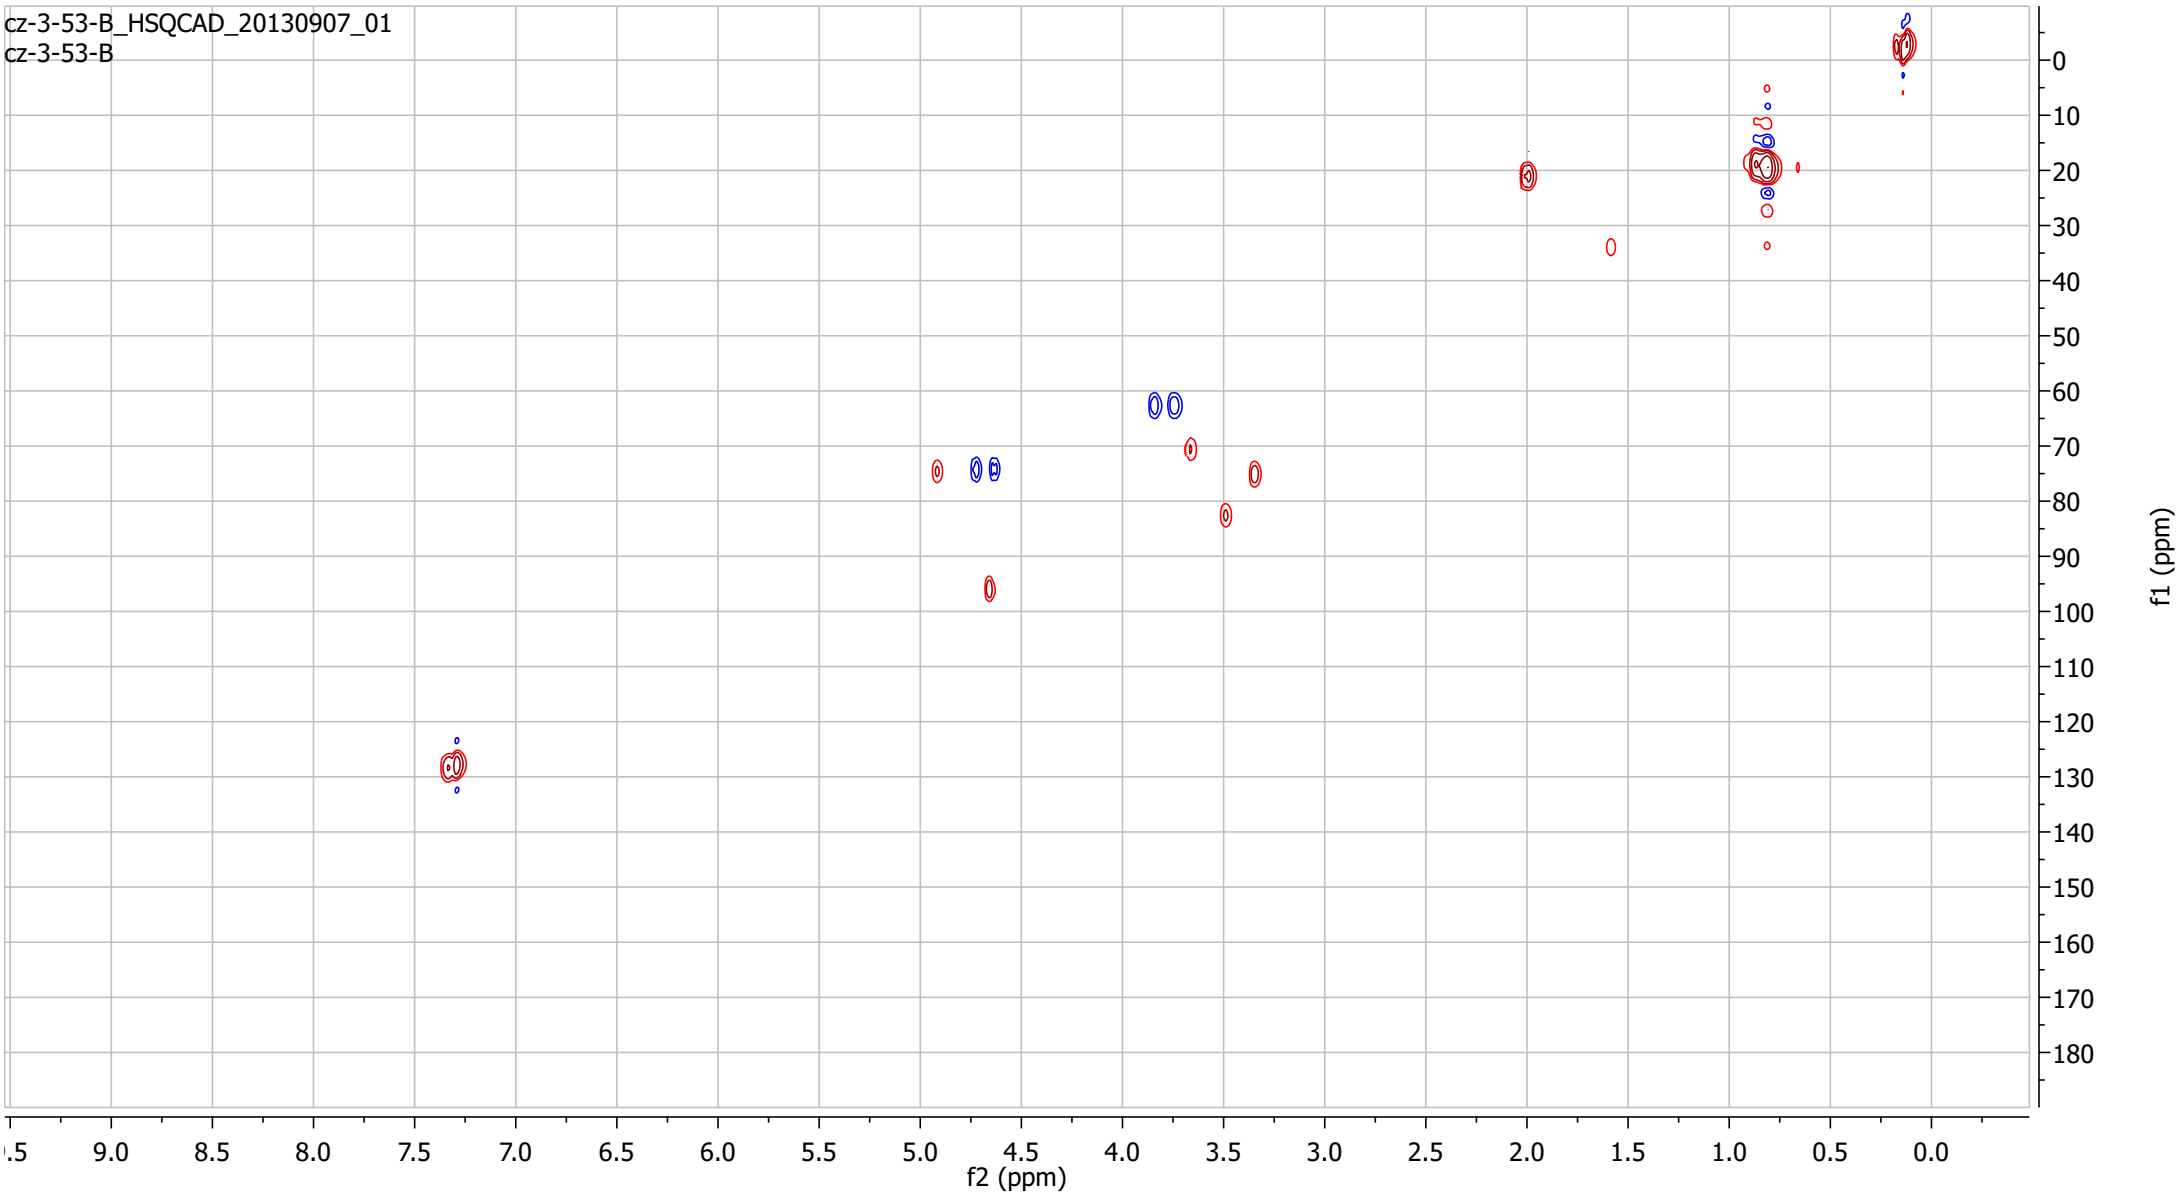

CDCl<sub>3</sub>

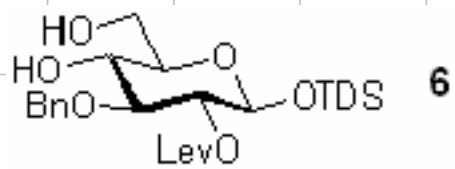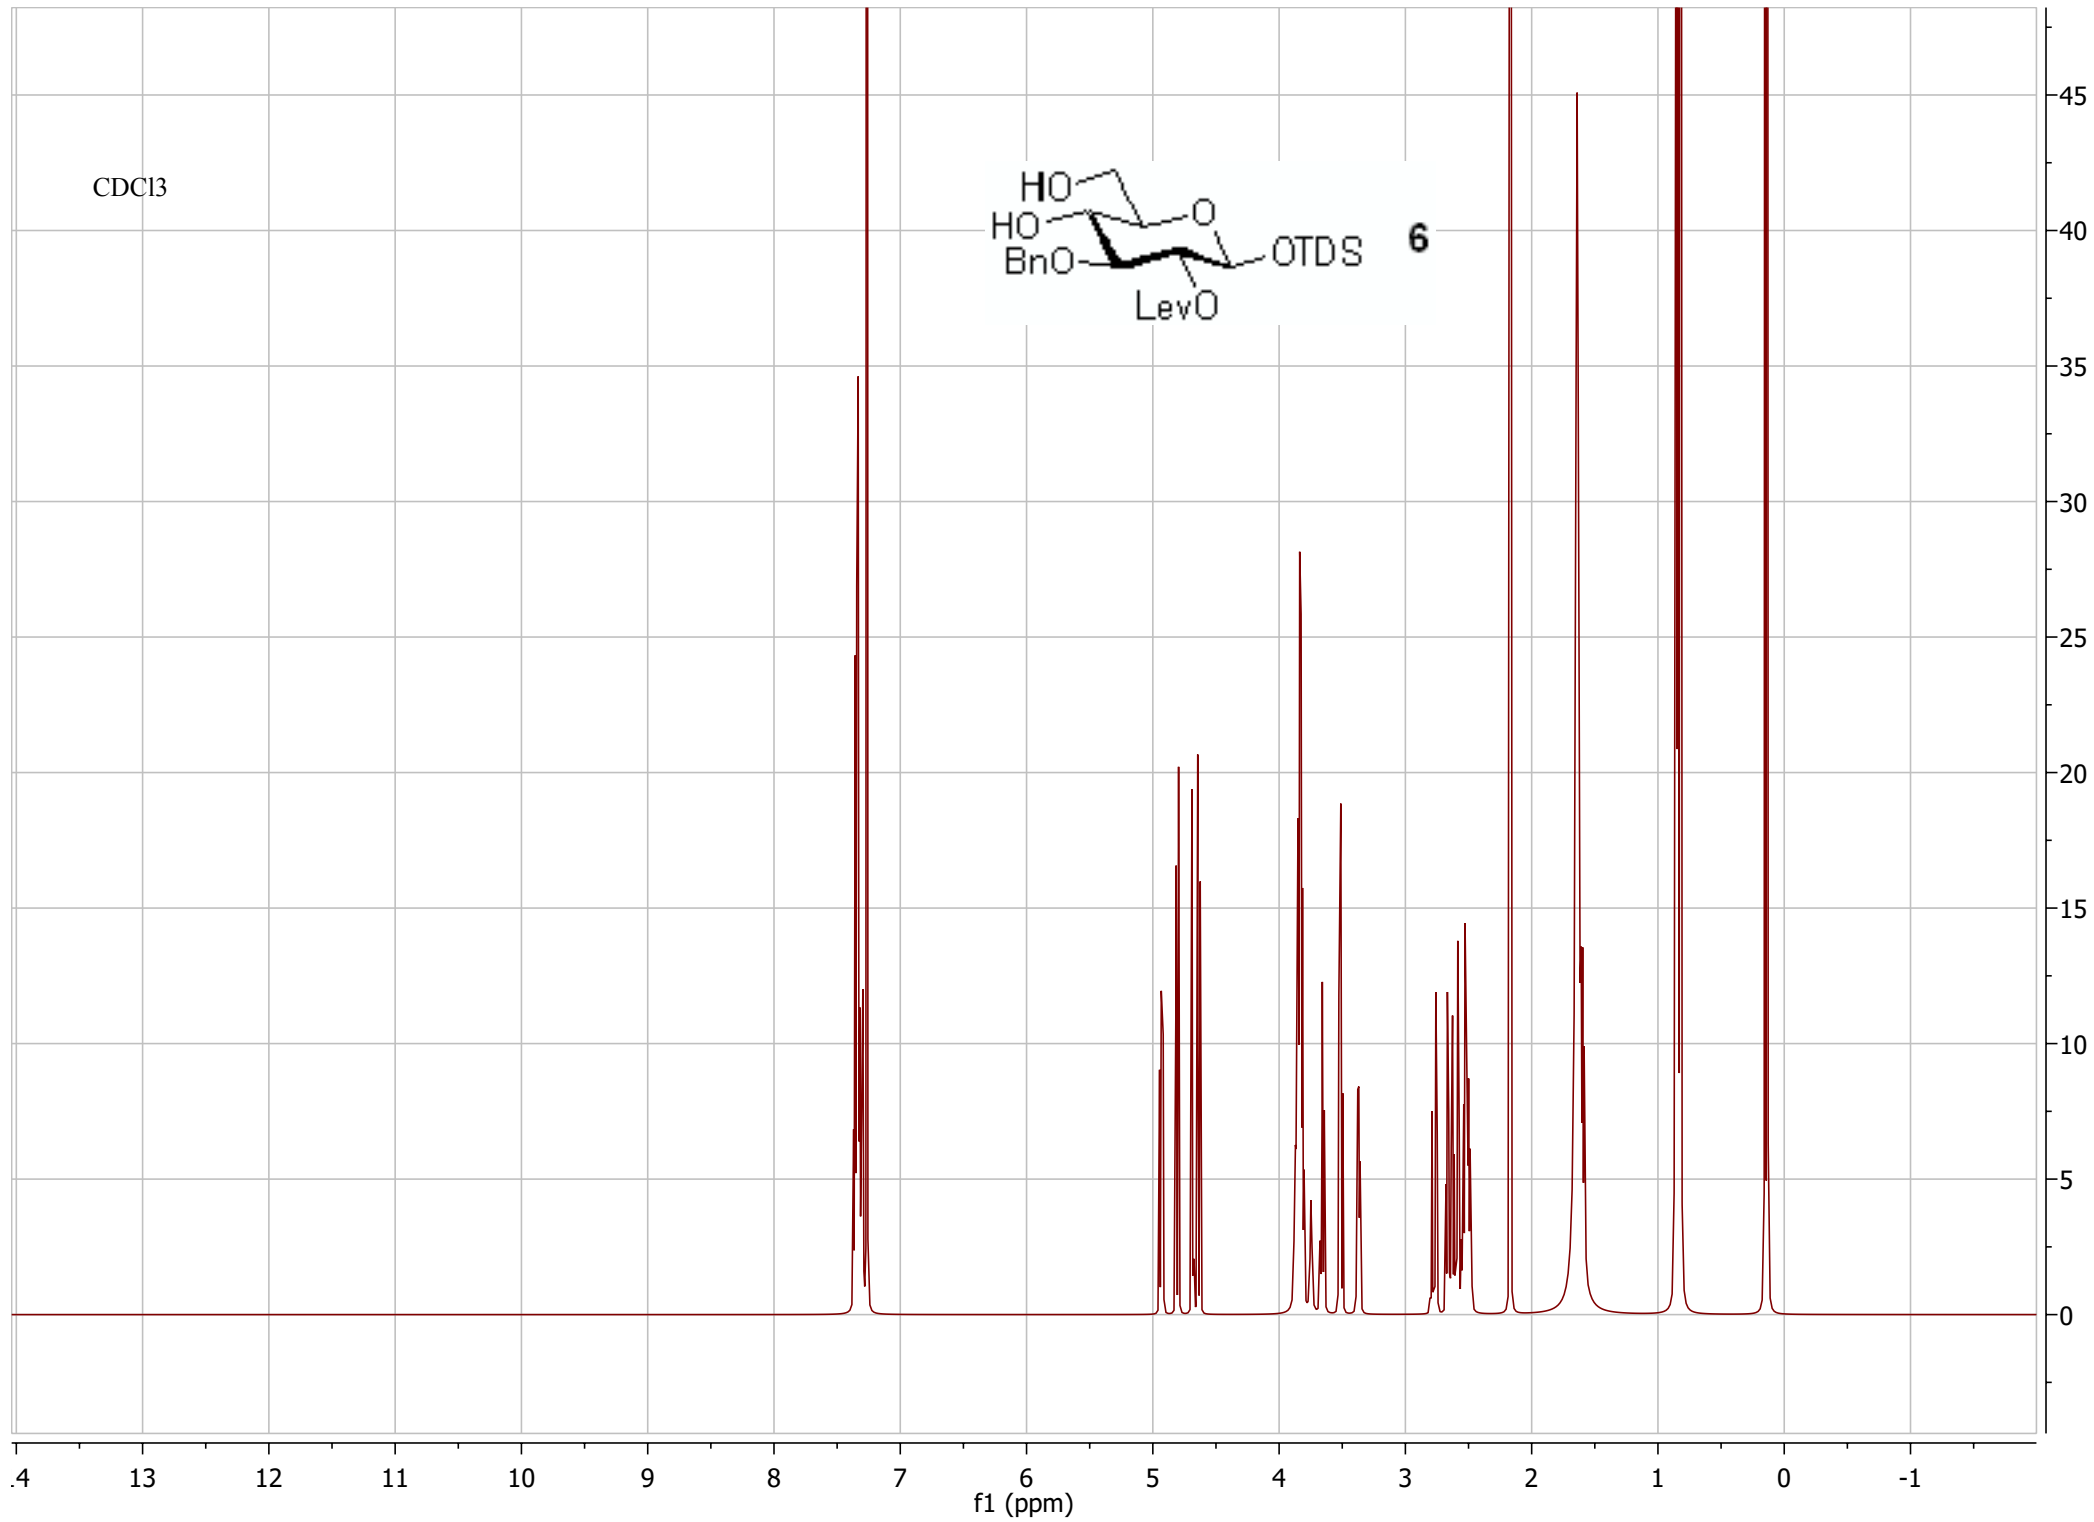

CDCl3

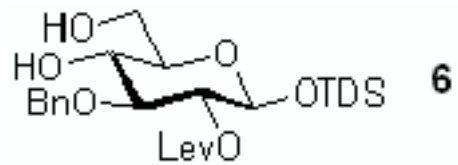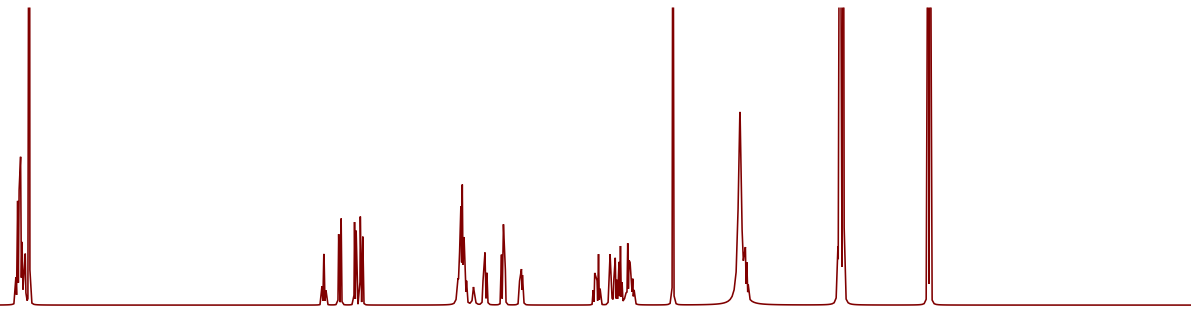

cz-3-61-omkar\_HSQCAD\_20130925\_01  
STANDARD 1H OBSERVE - profile

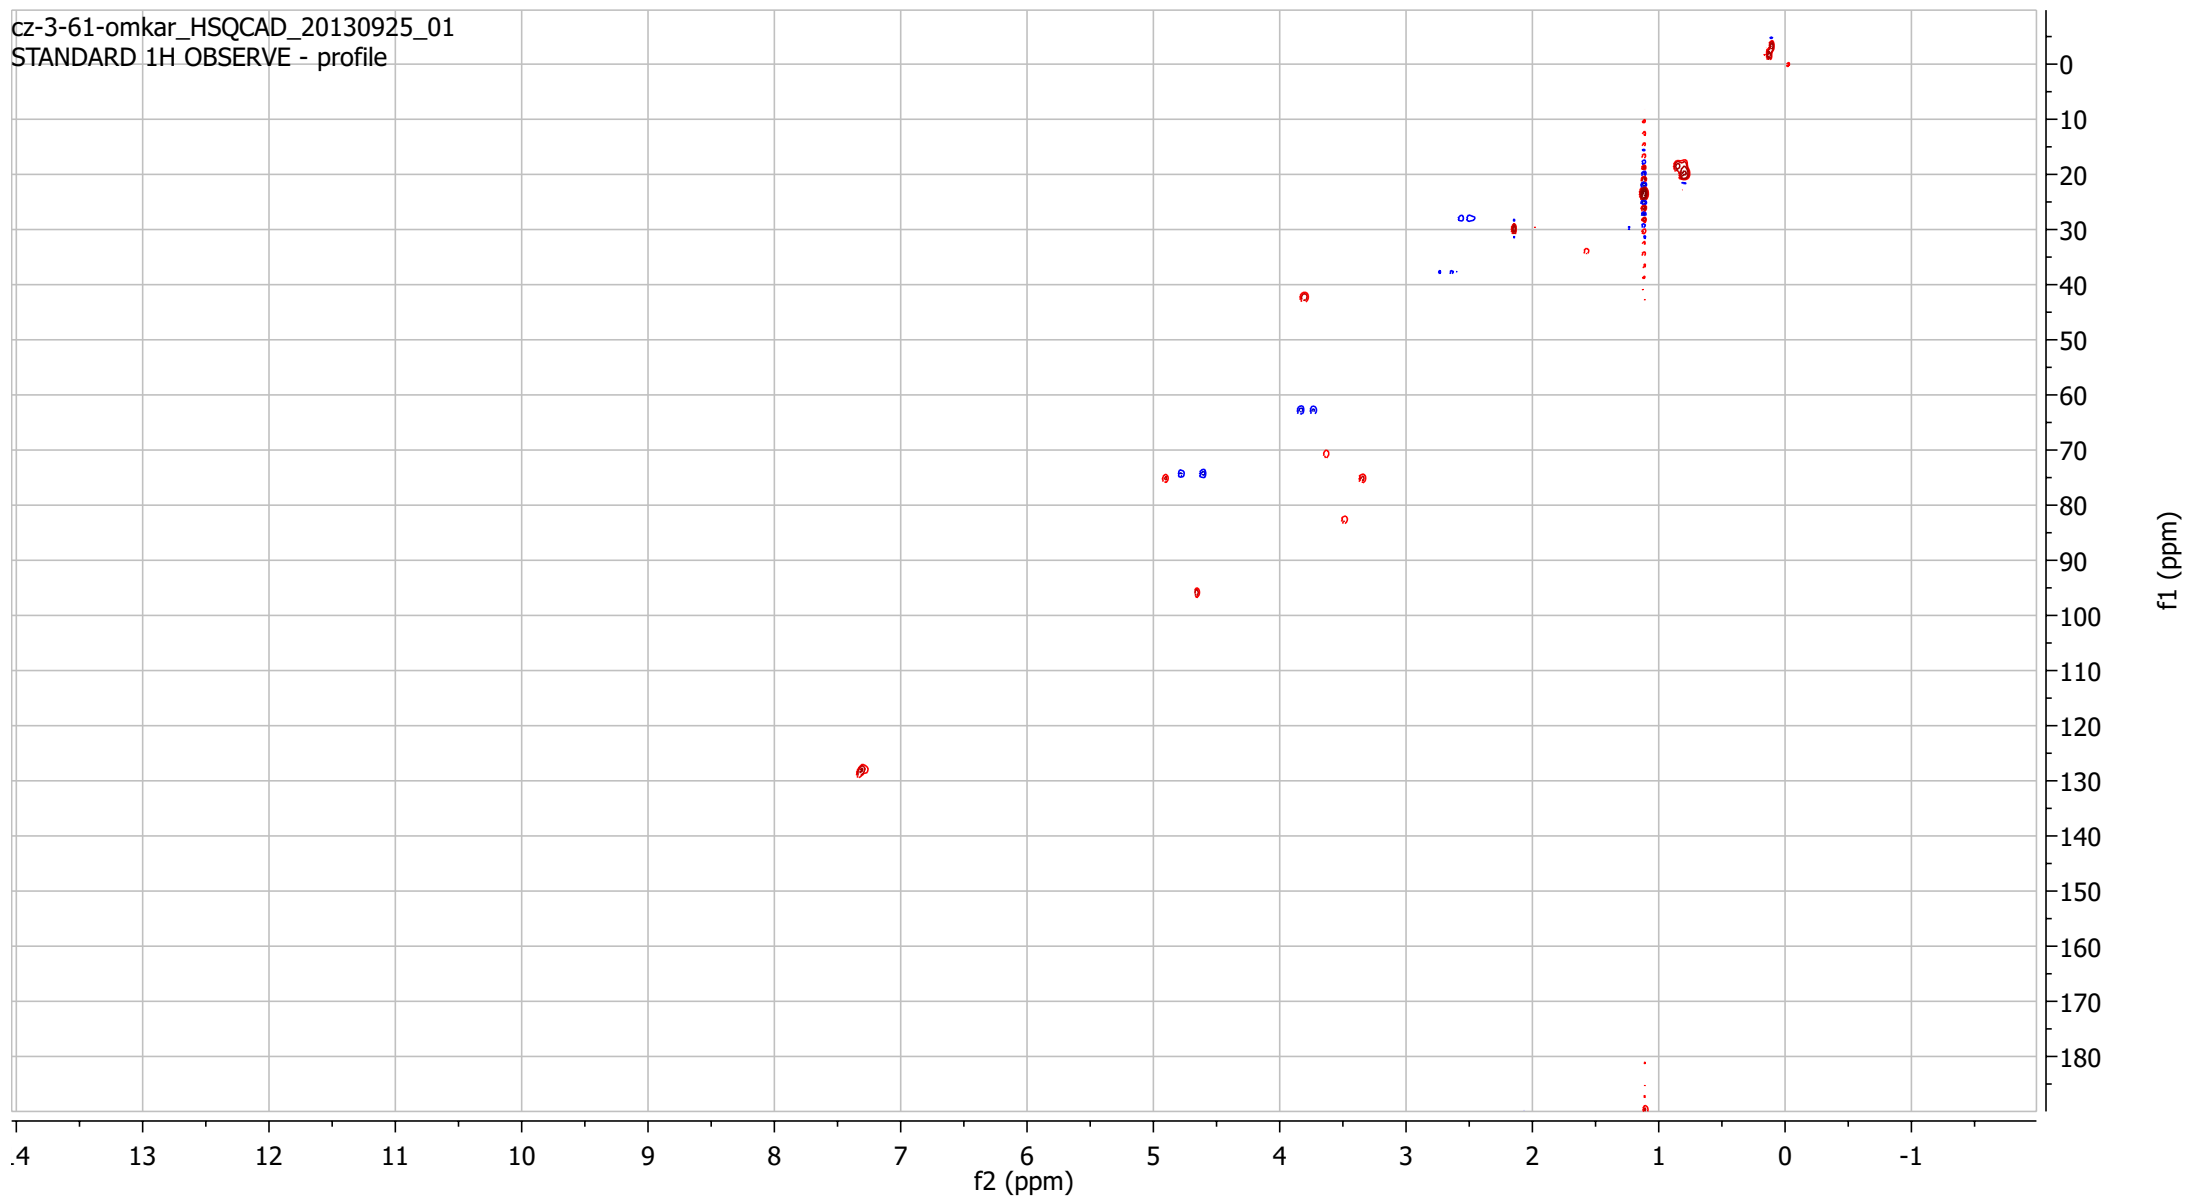



CDCl<sub>3</sub>

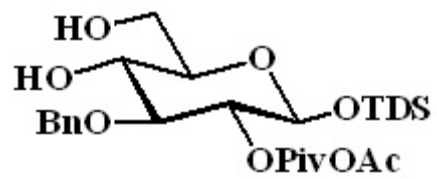

7

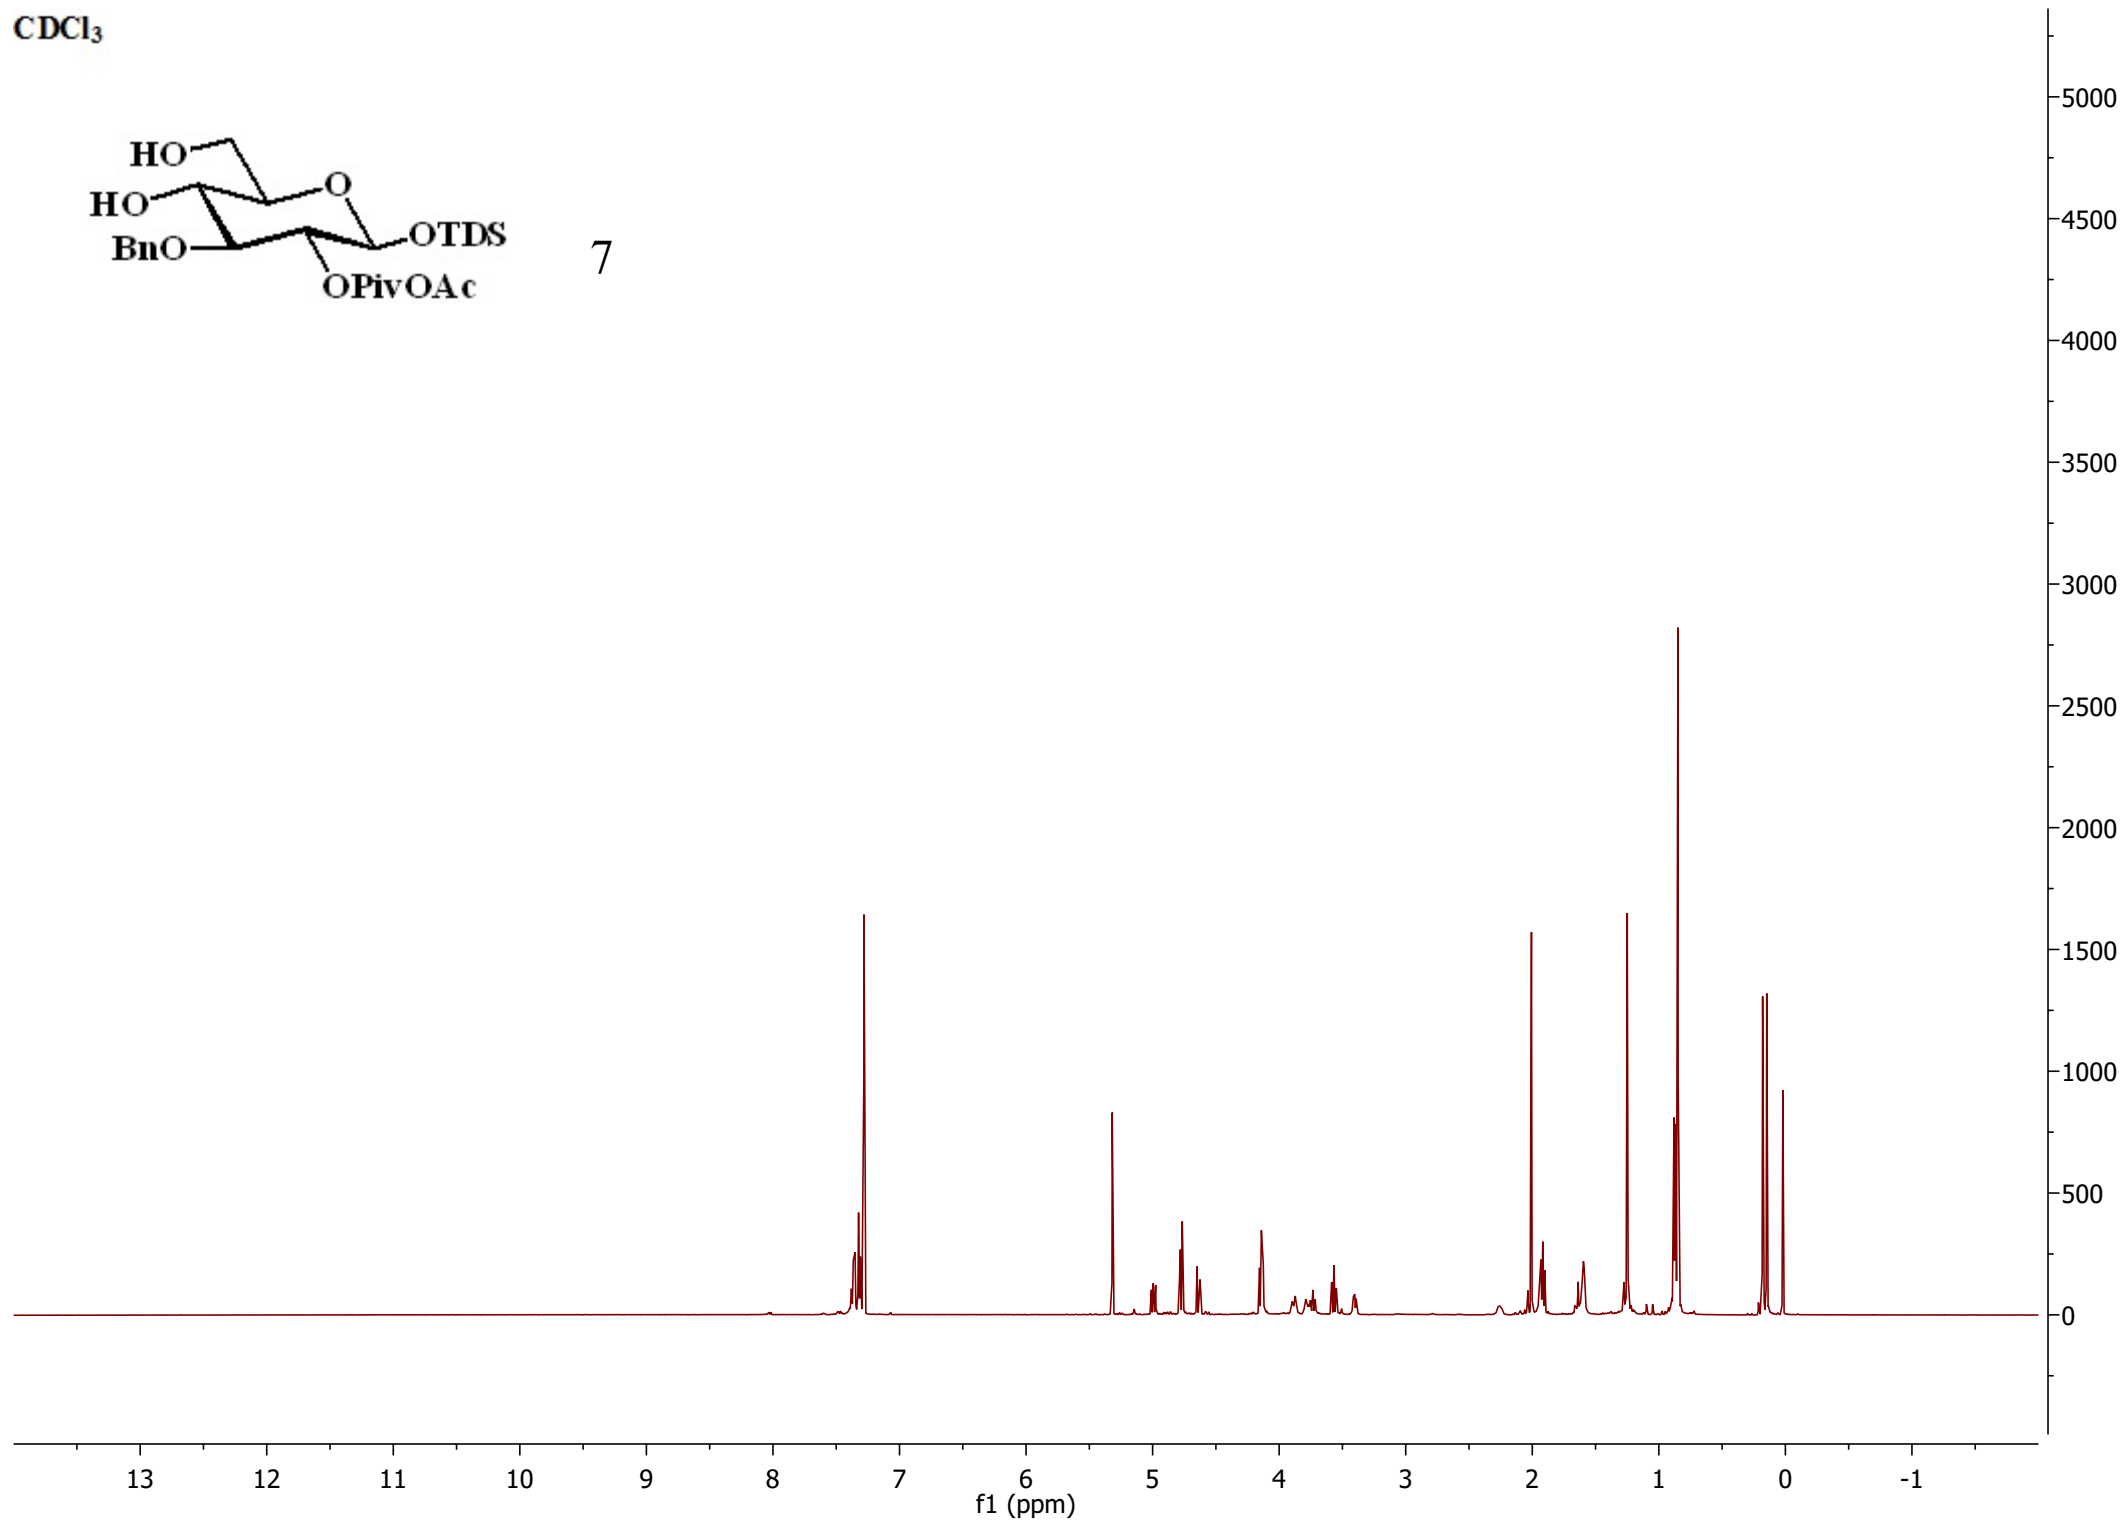

CDCl<sub>3</sub>

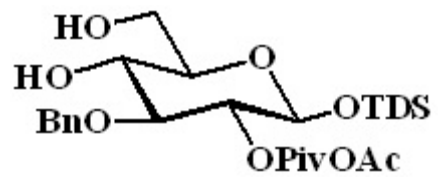

7

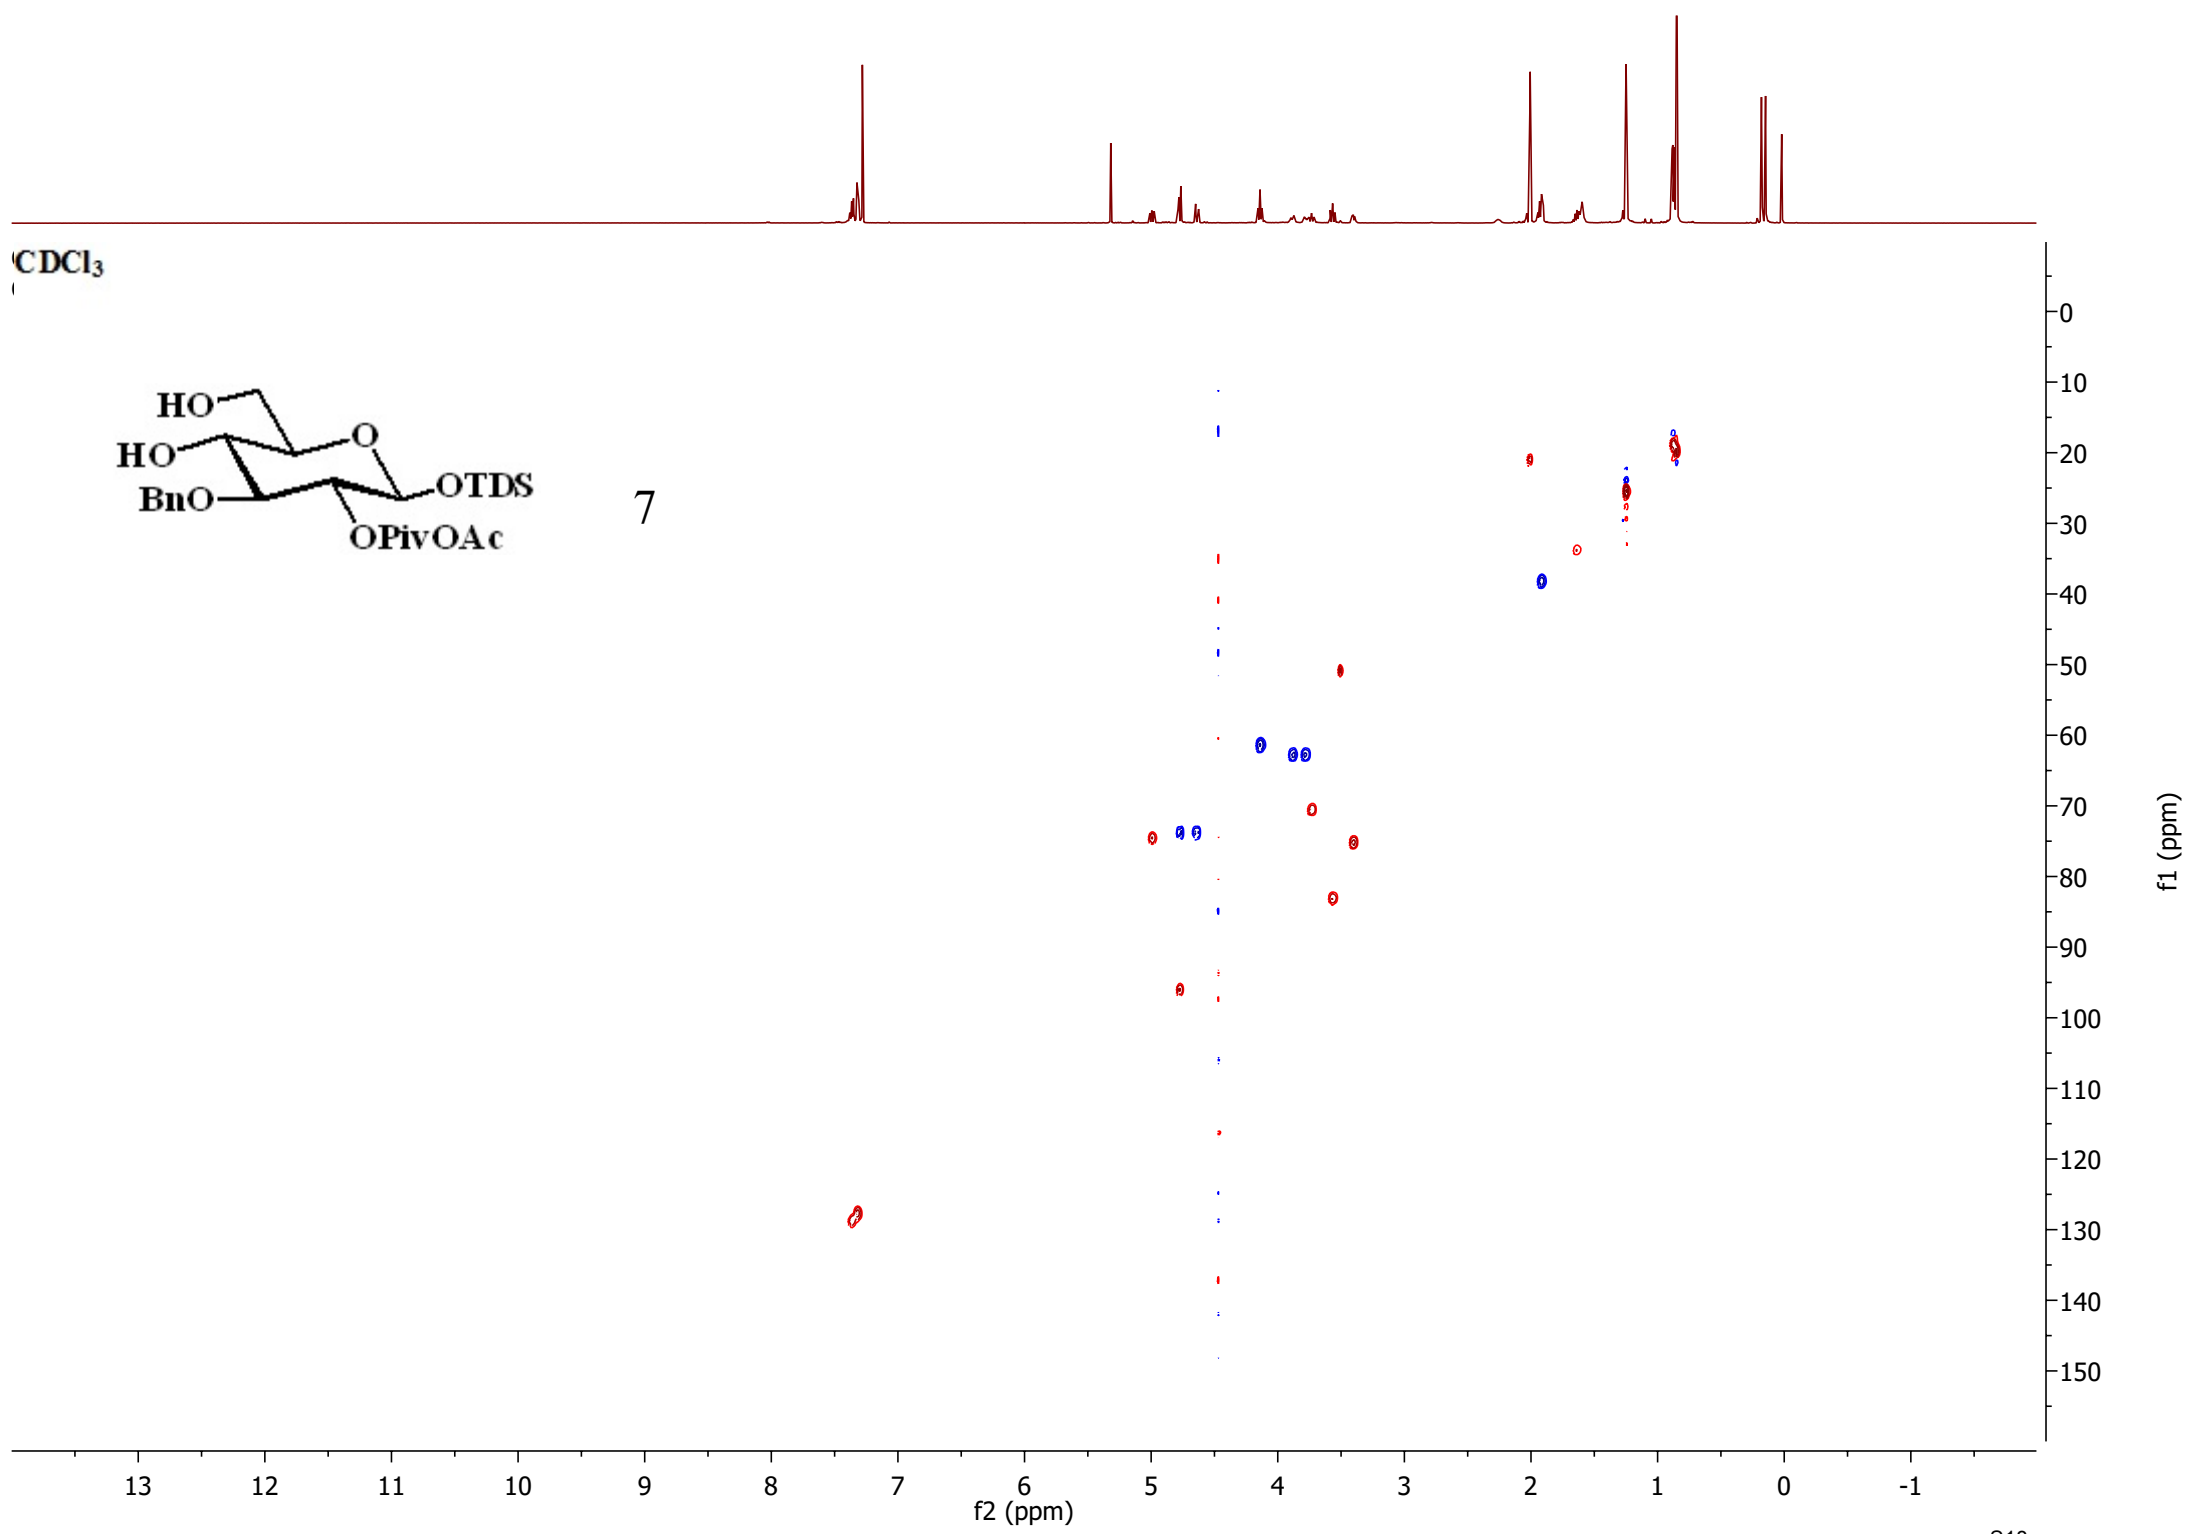

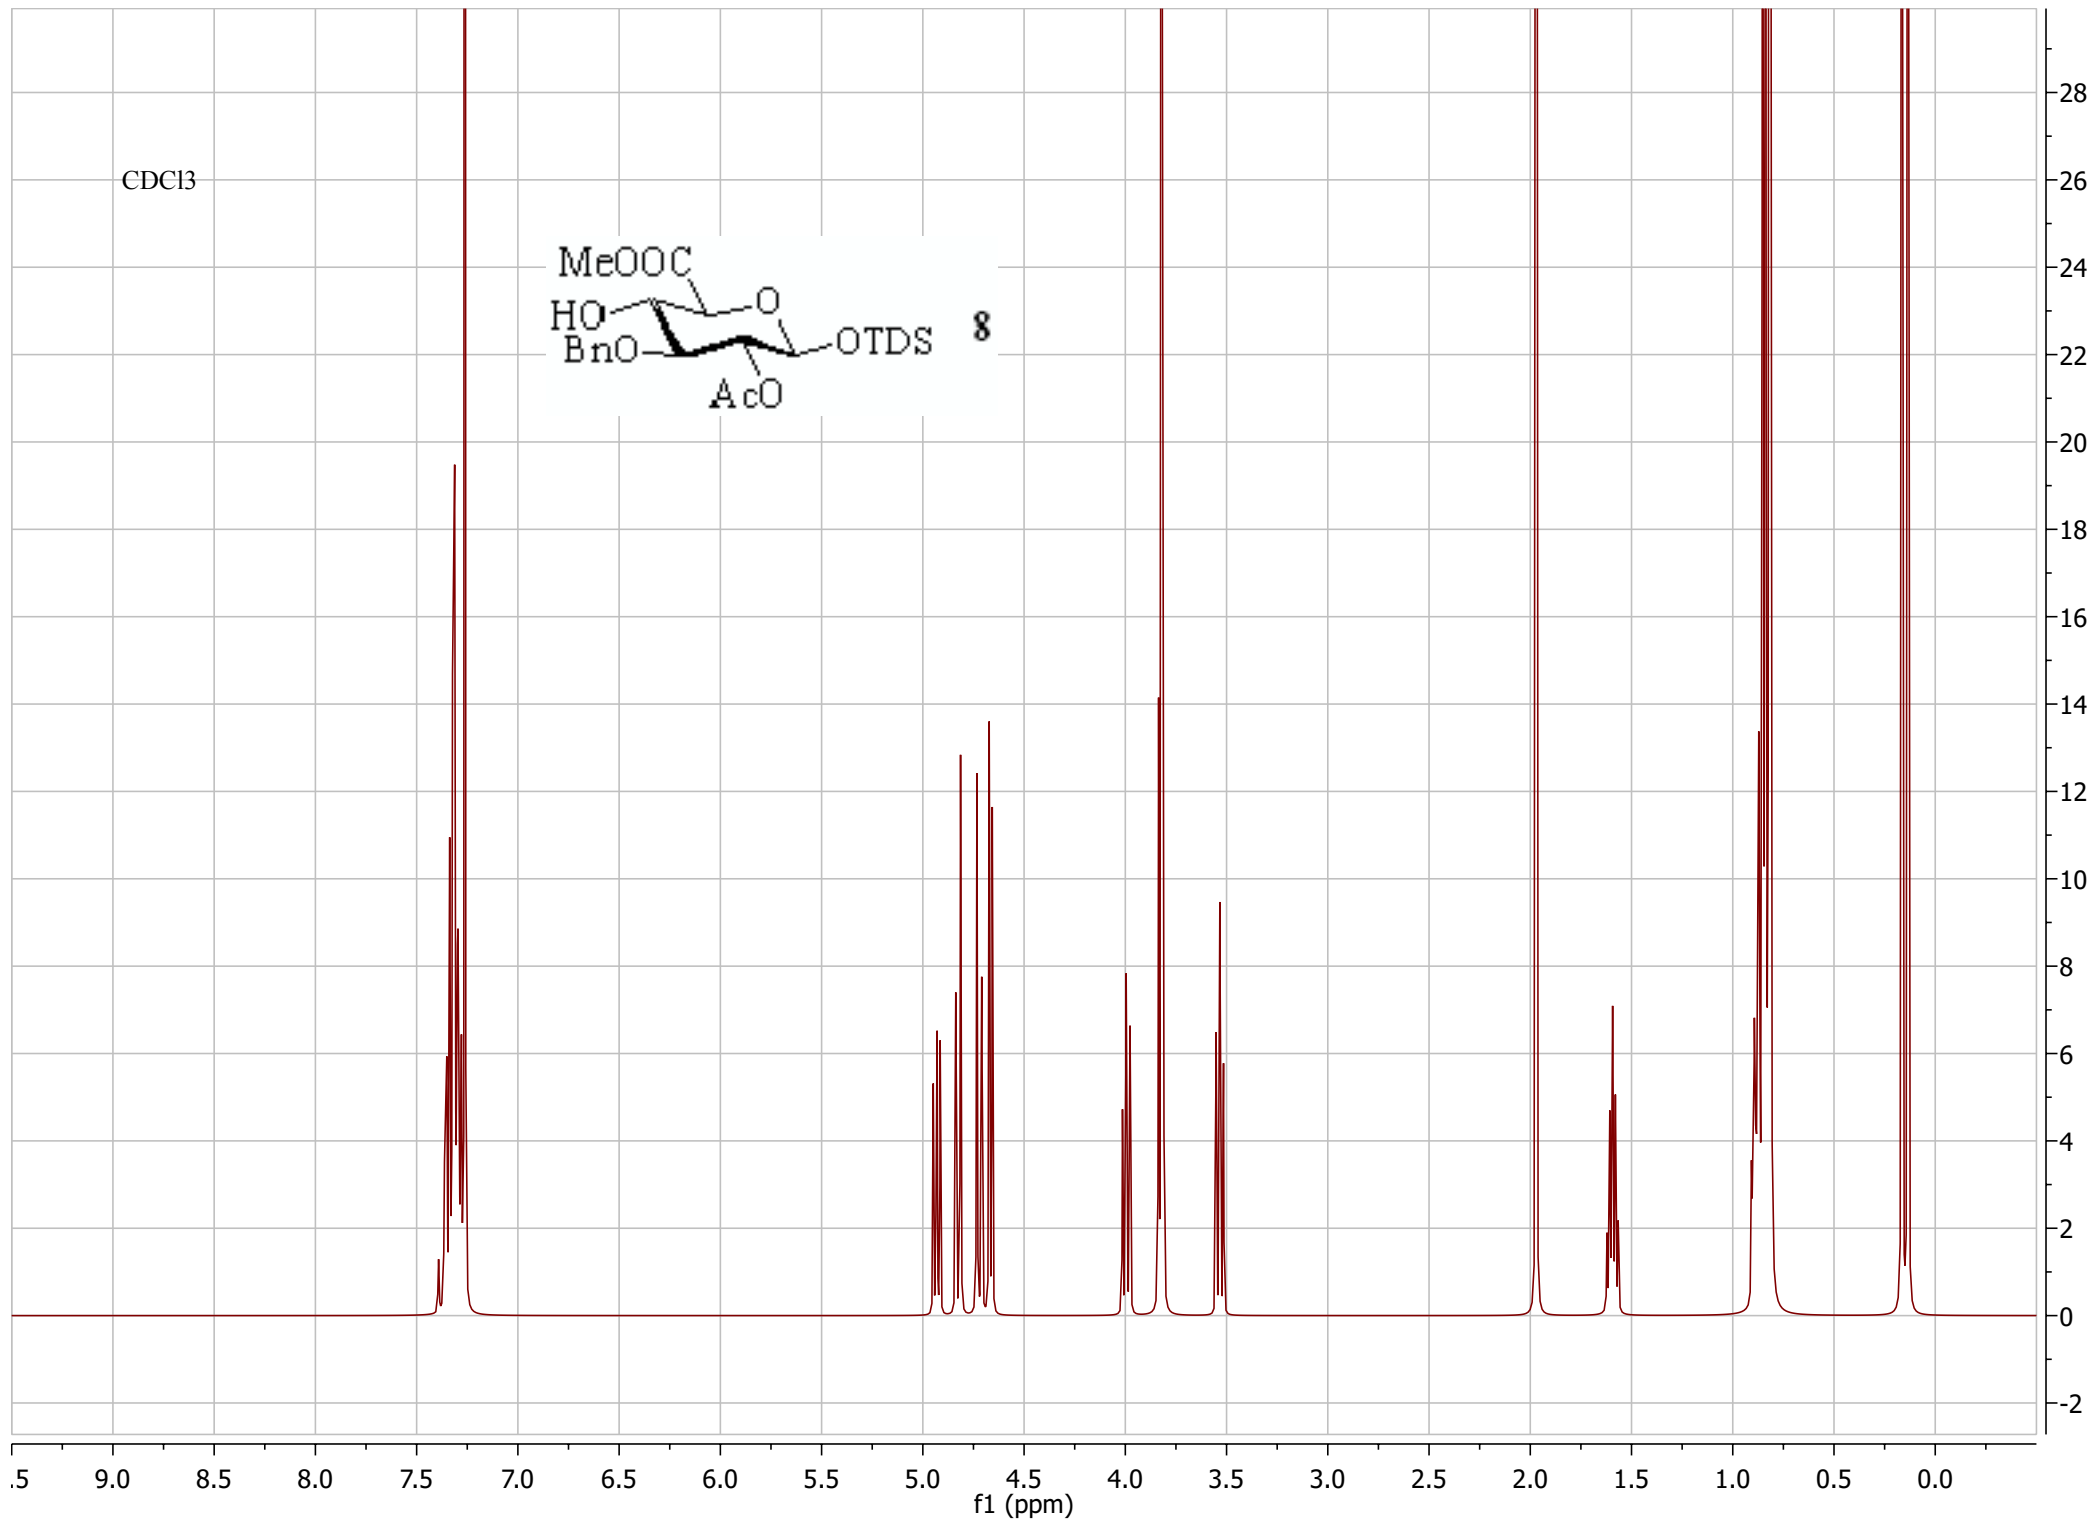

CDCl3

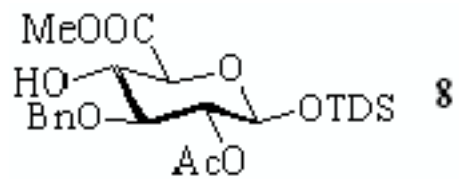

cz-3-53C\_HSQCAD\_20130922\_01  
cz-3-53C

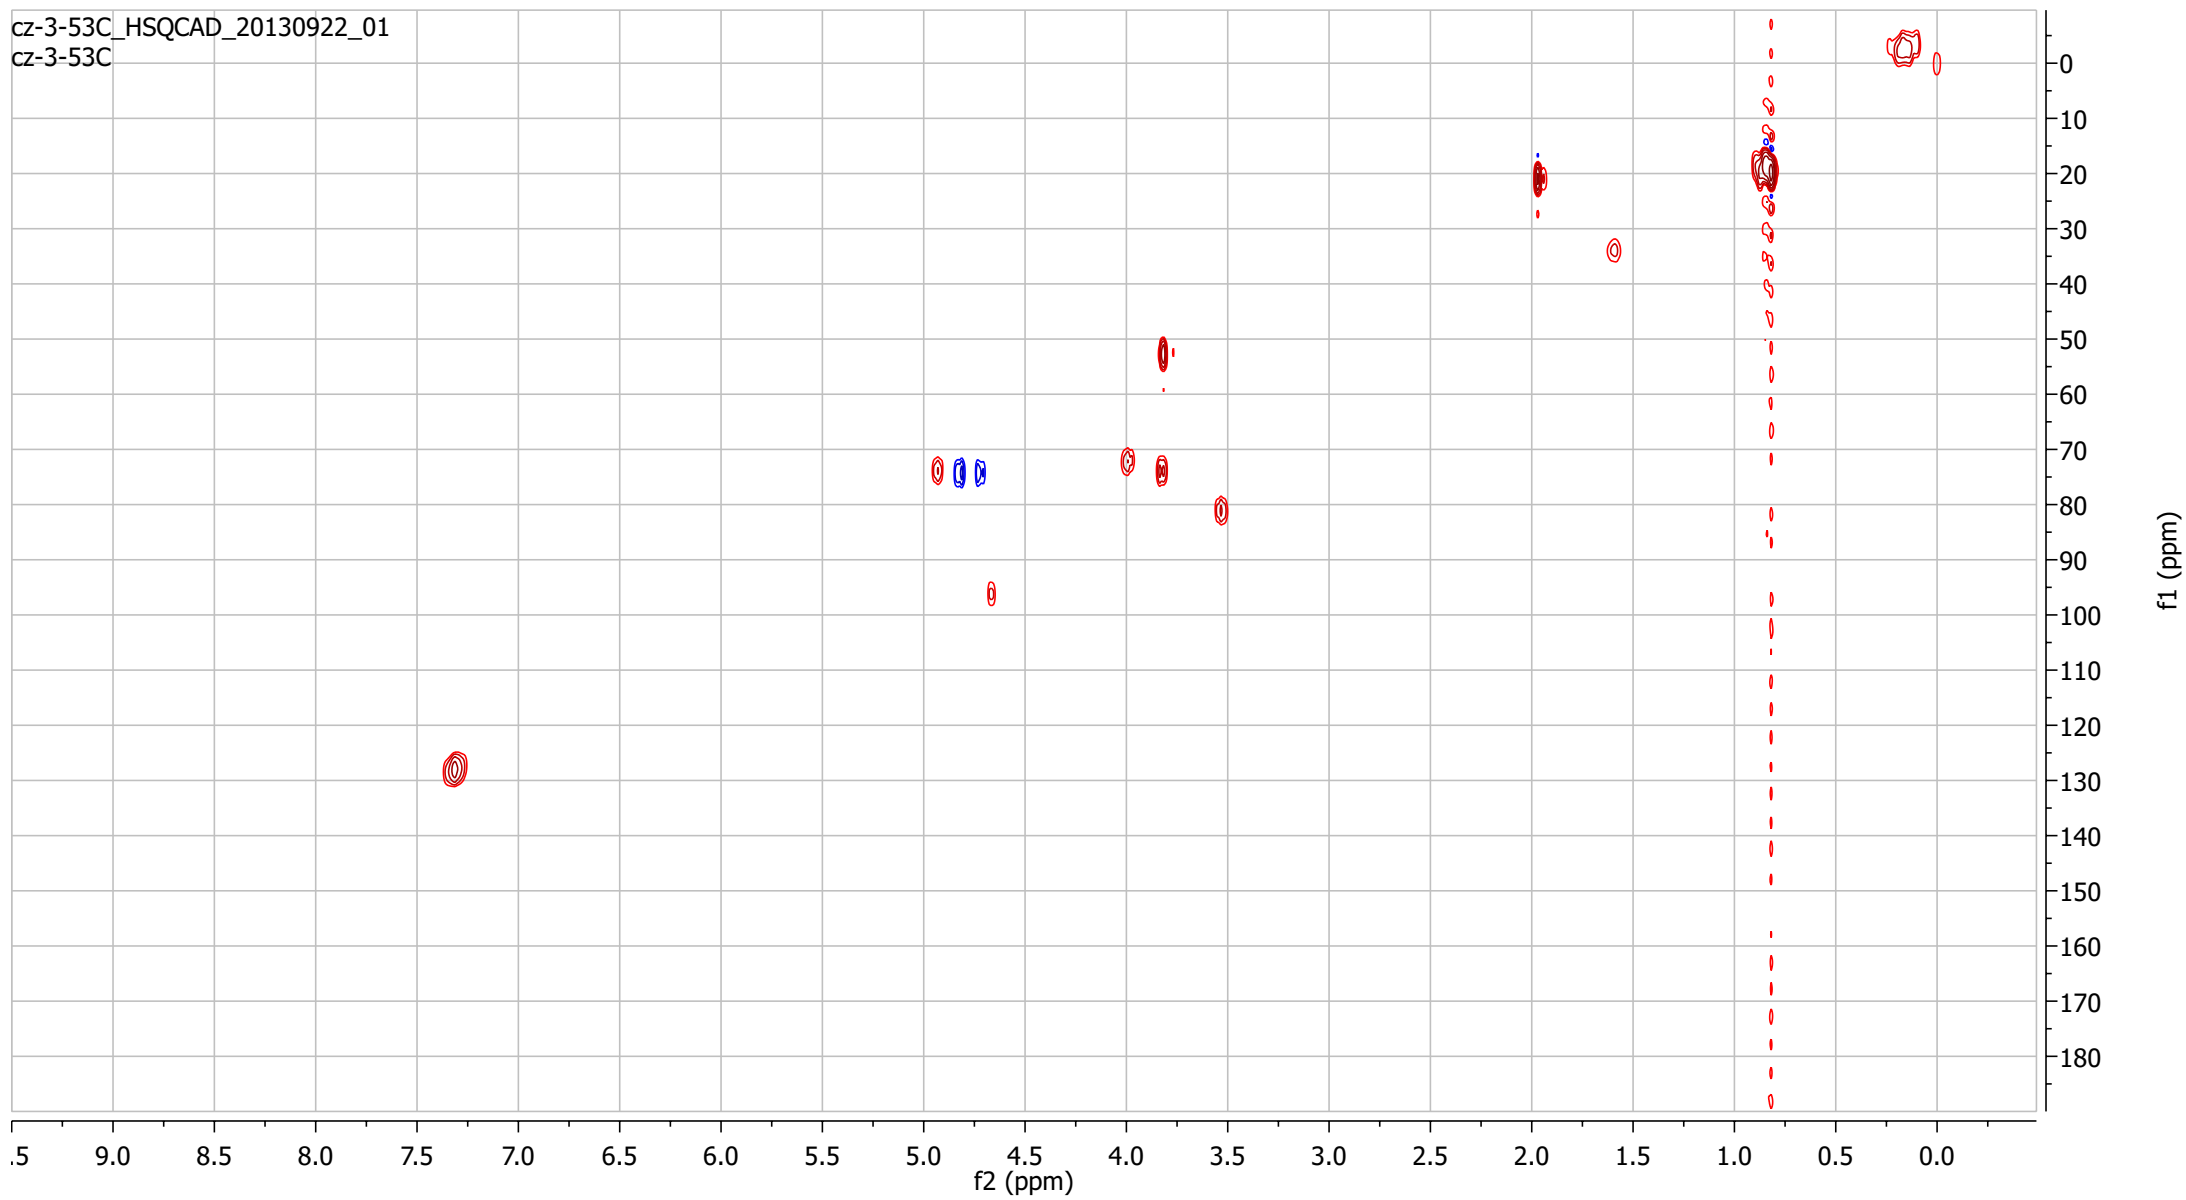

CDCl<sub>3</sub>

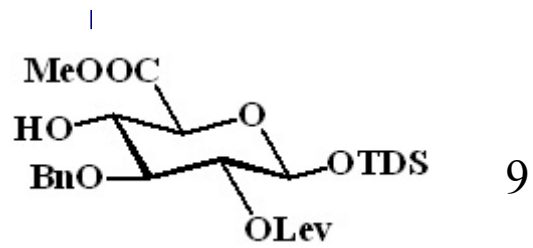

9

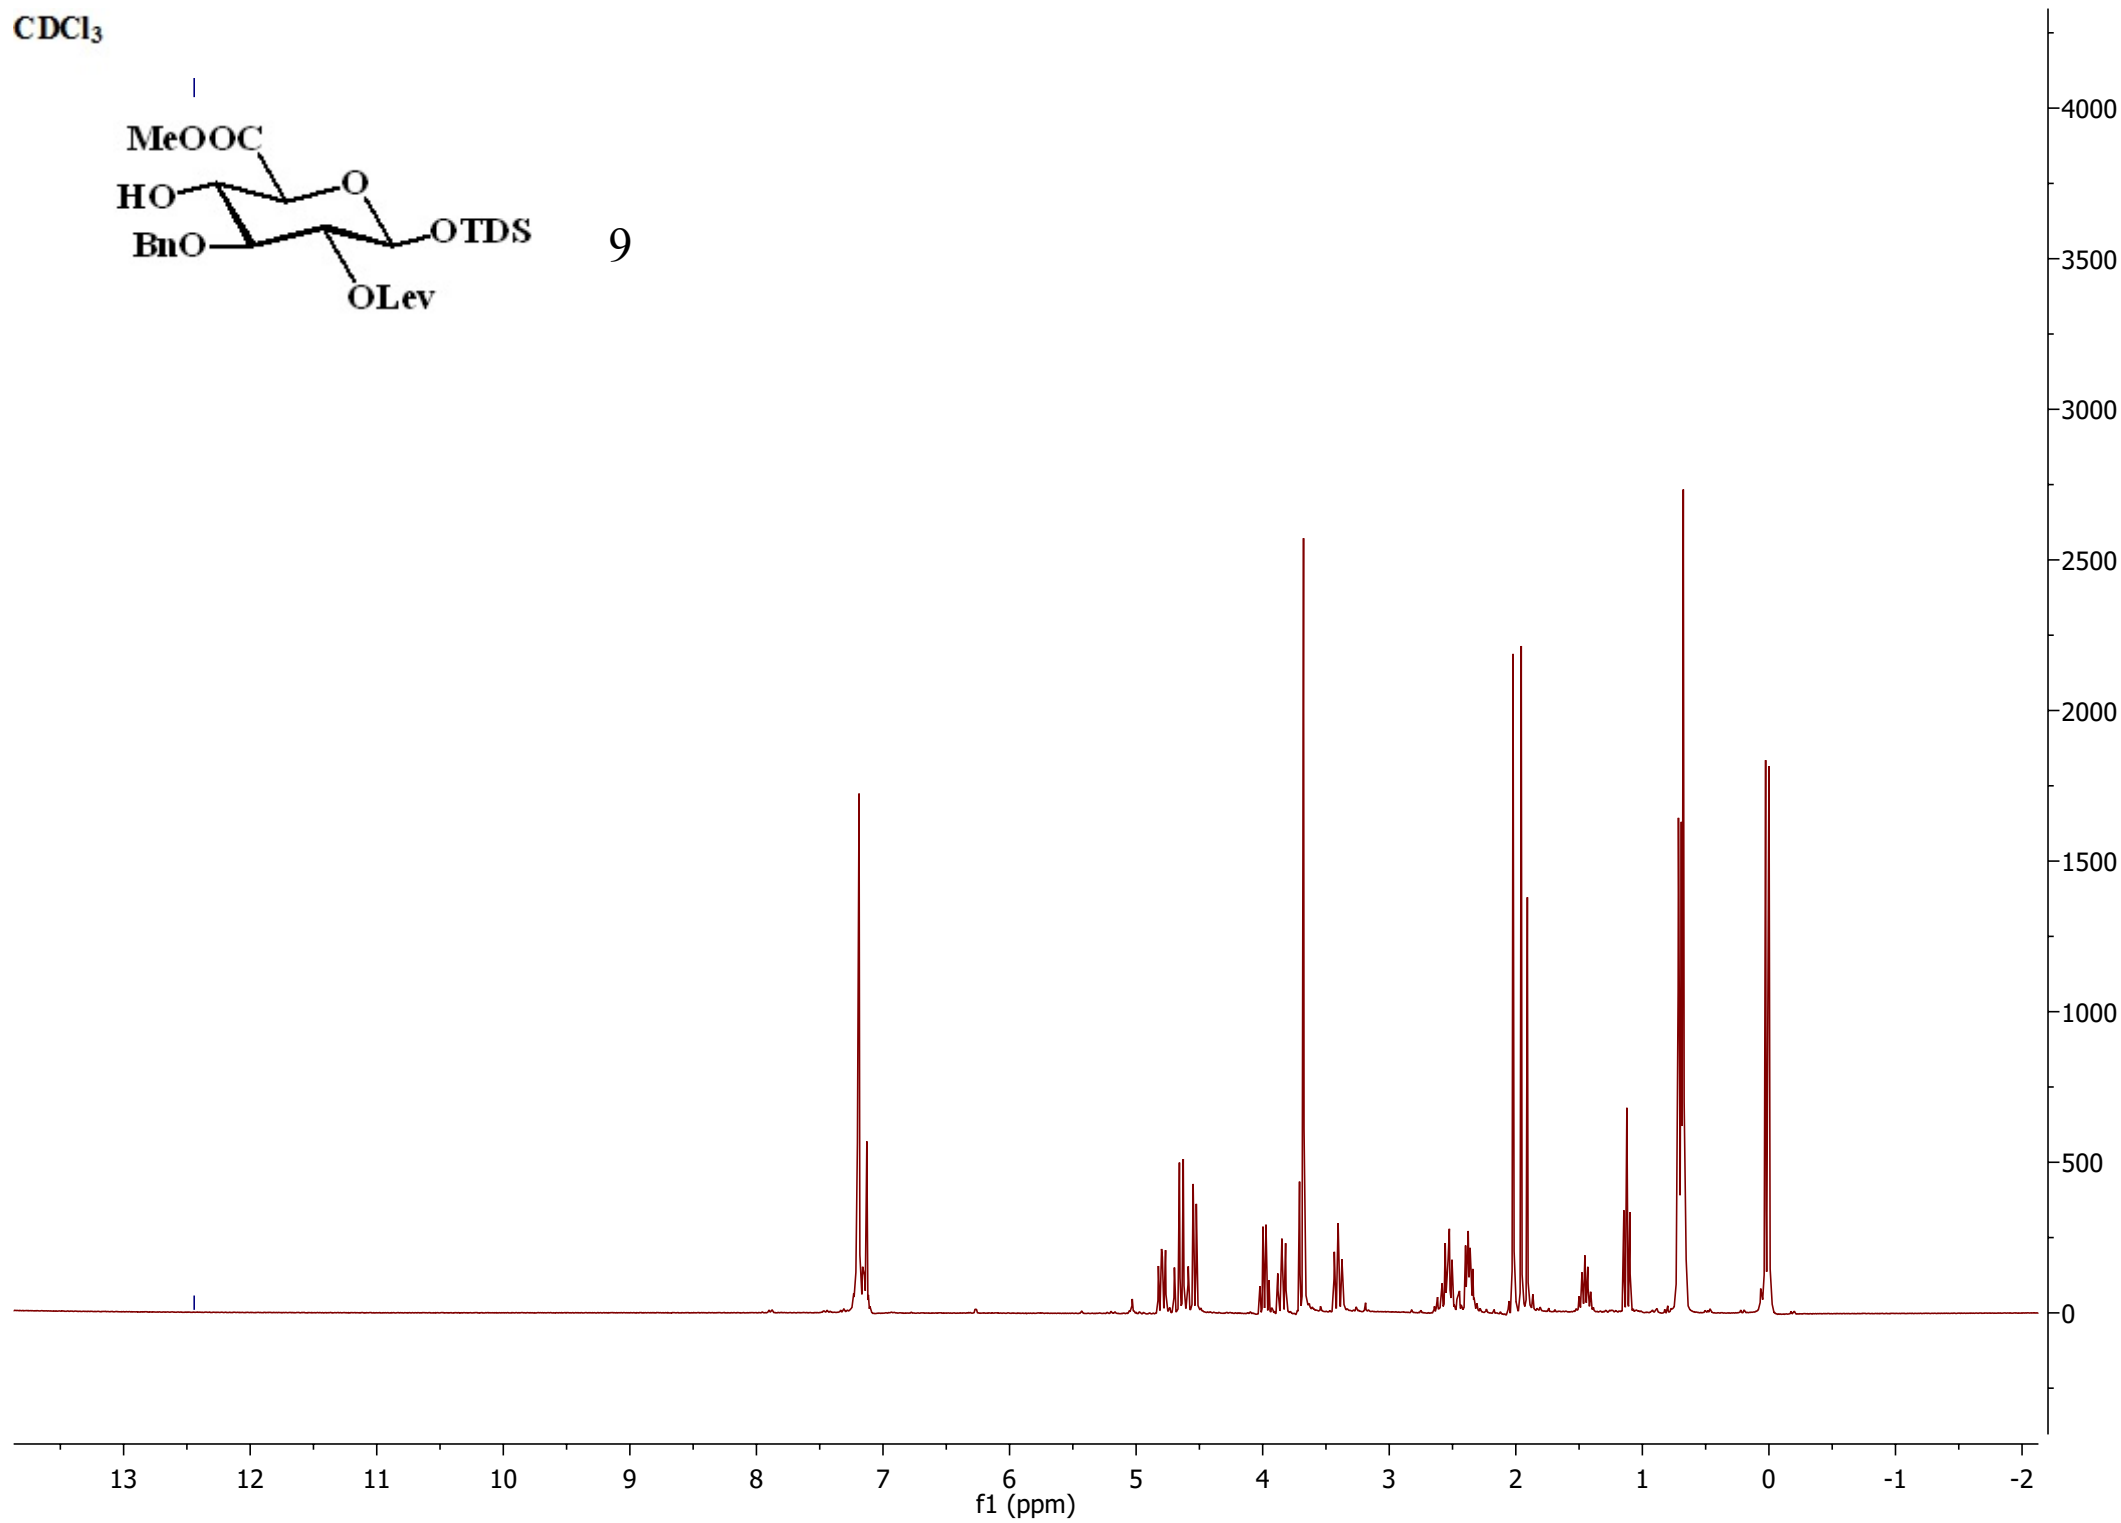

S21

CDCl<sub>3</sub>

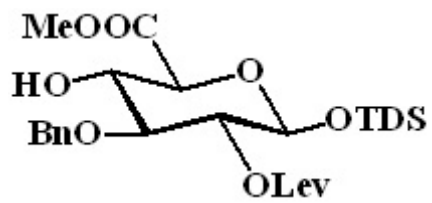

9

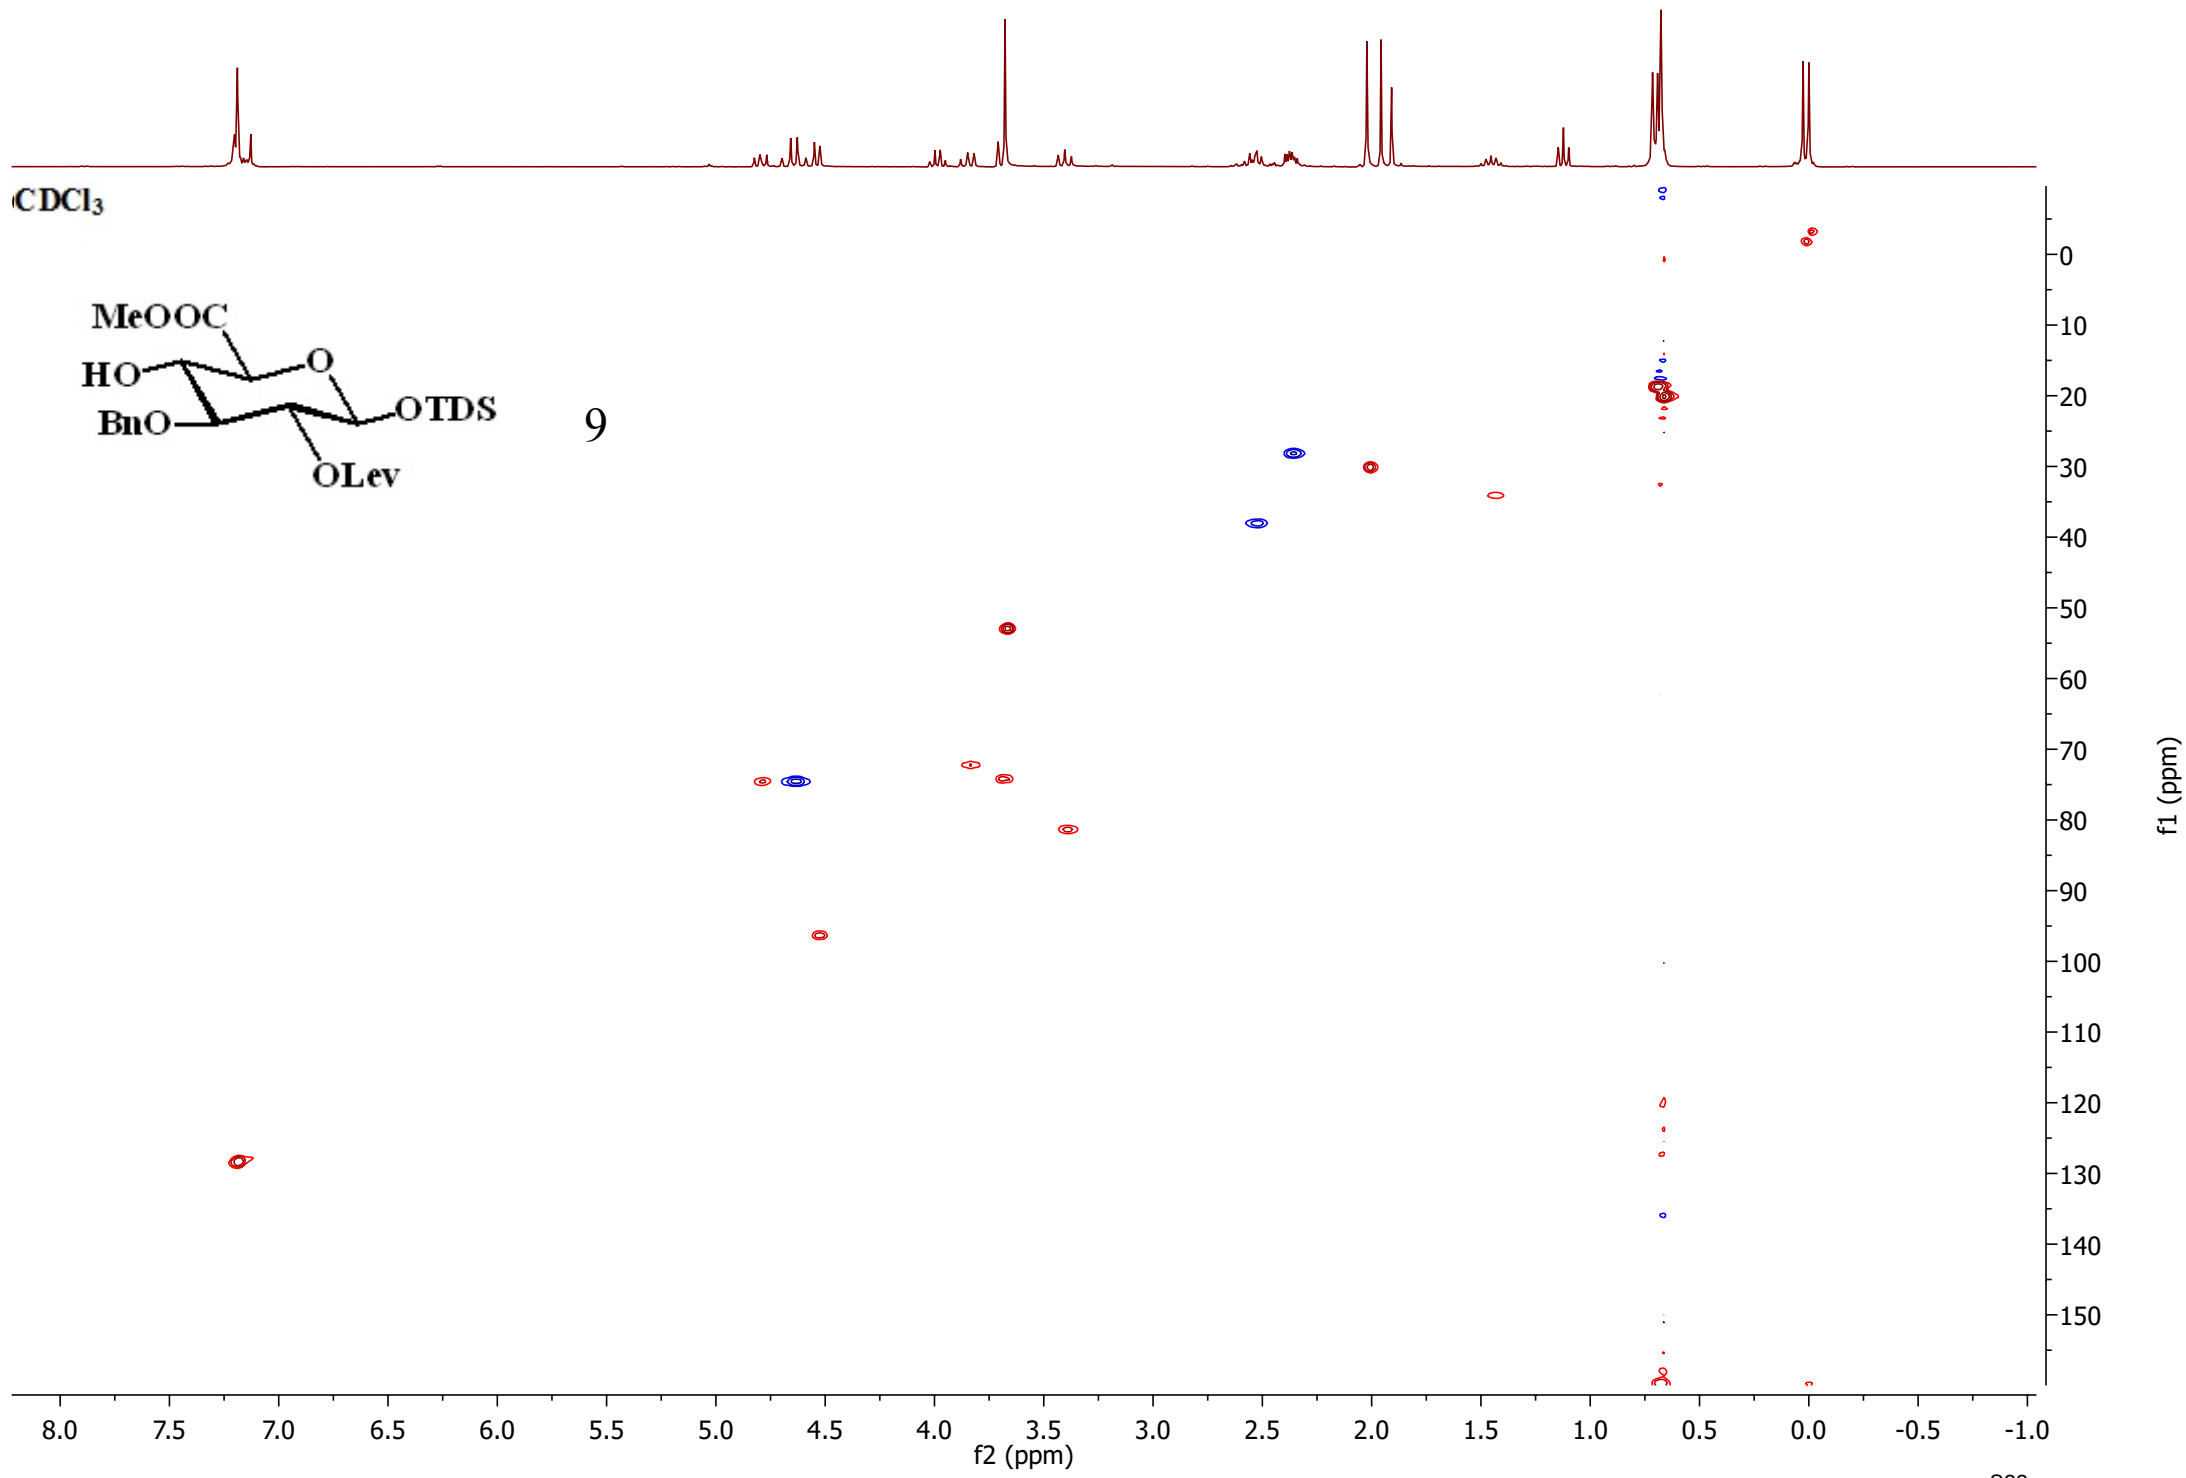

CDCl<sub>3</sub>

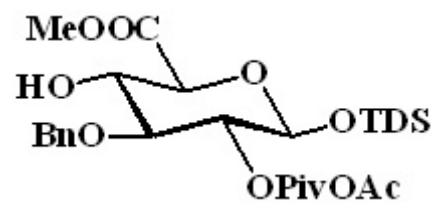

10

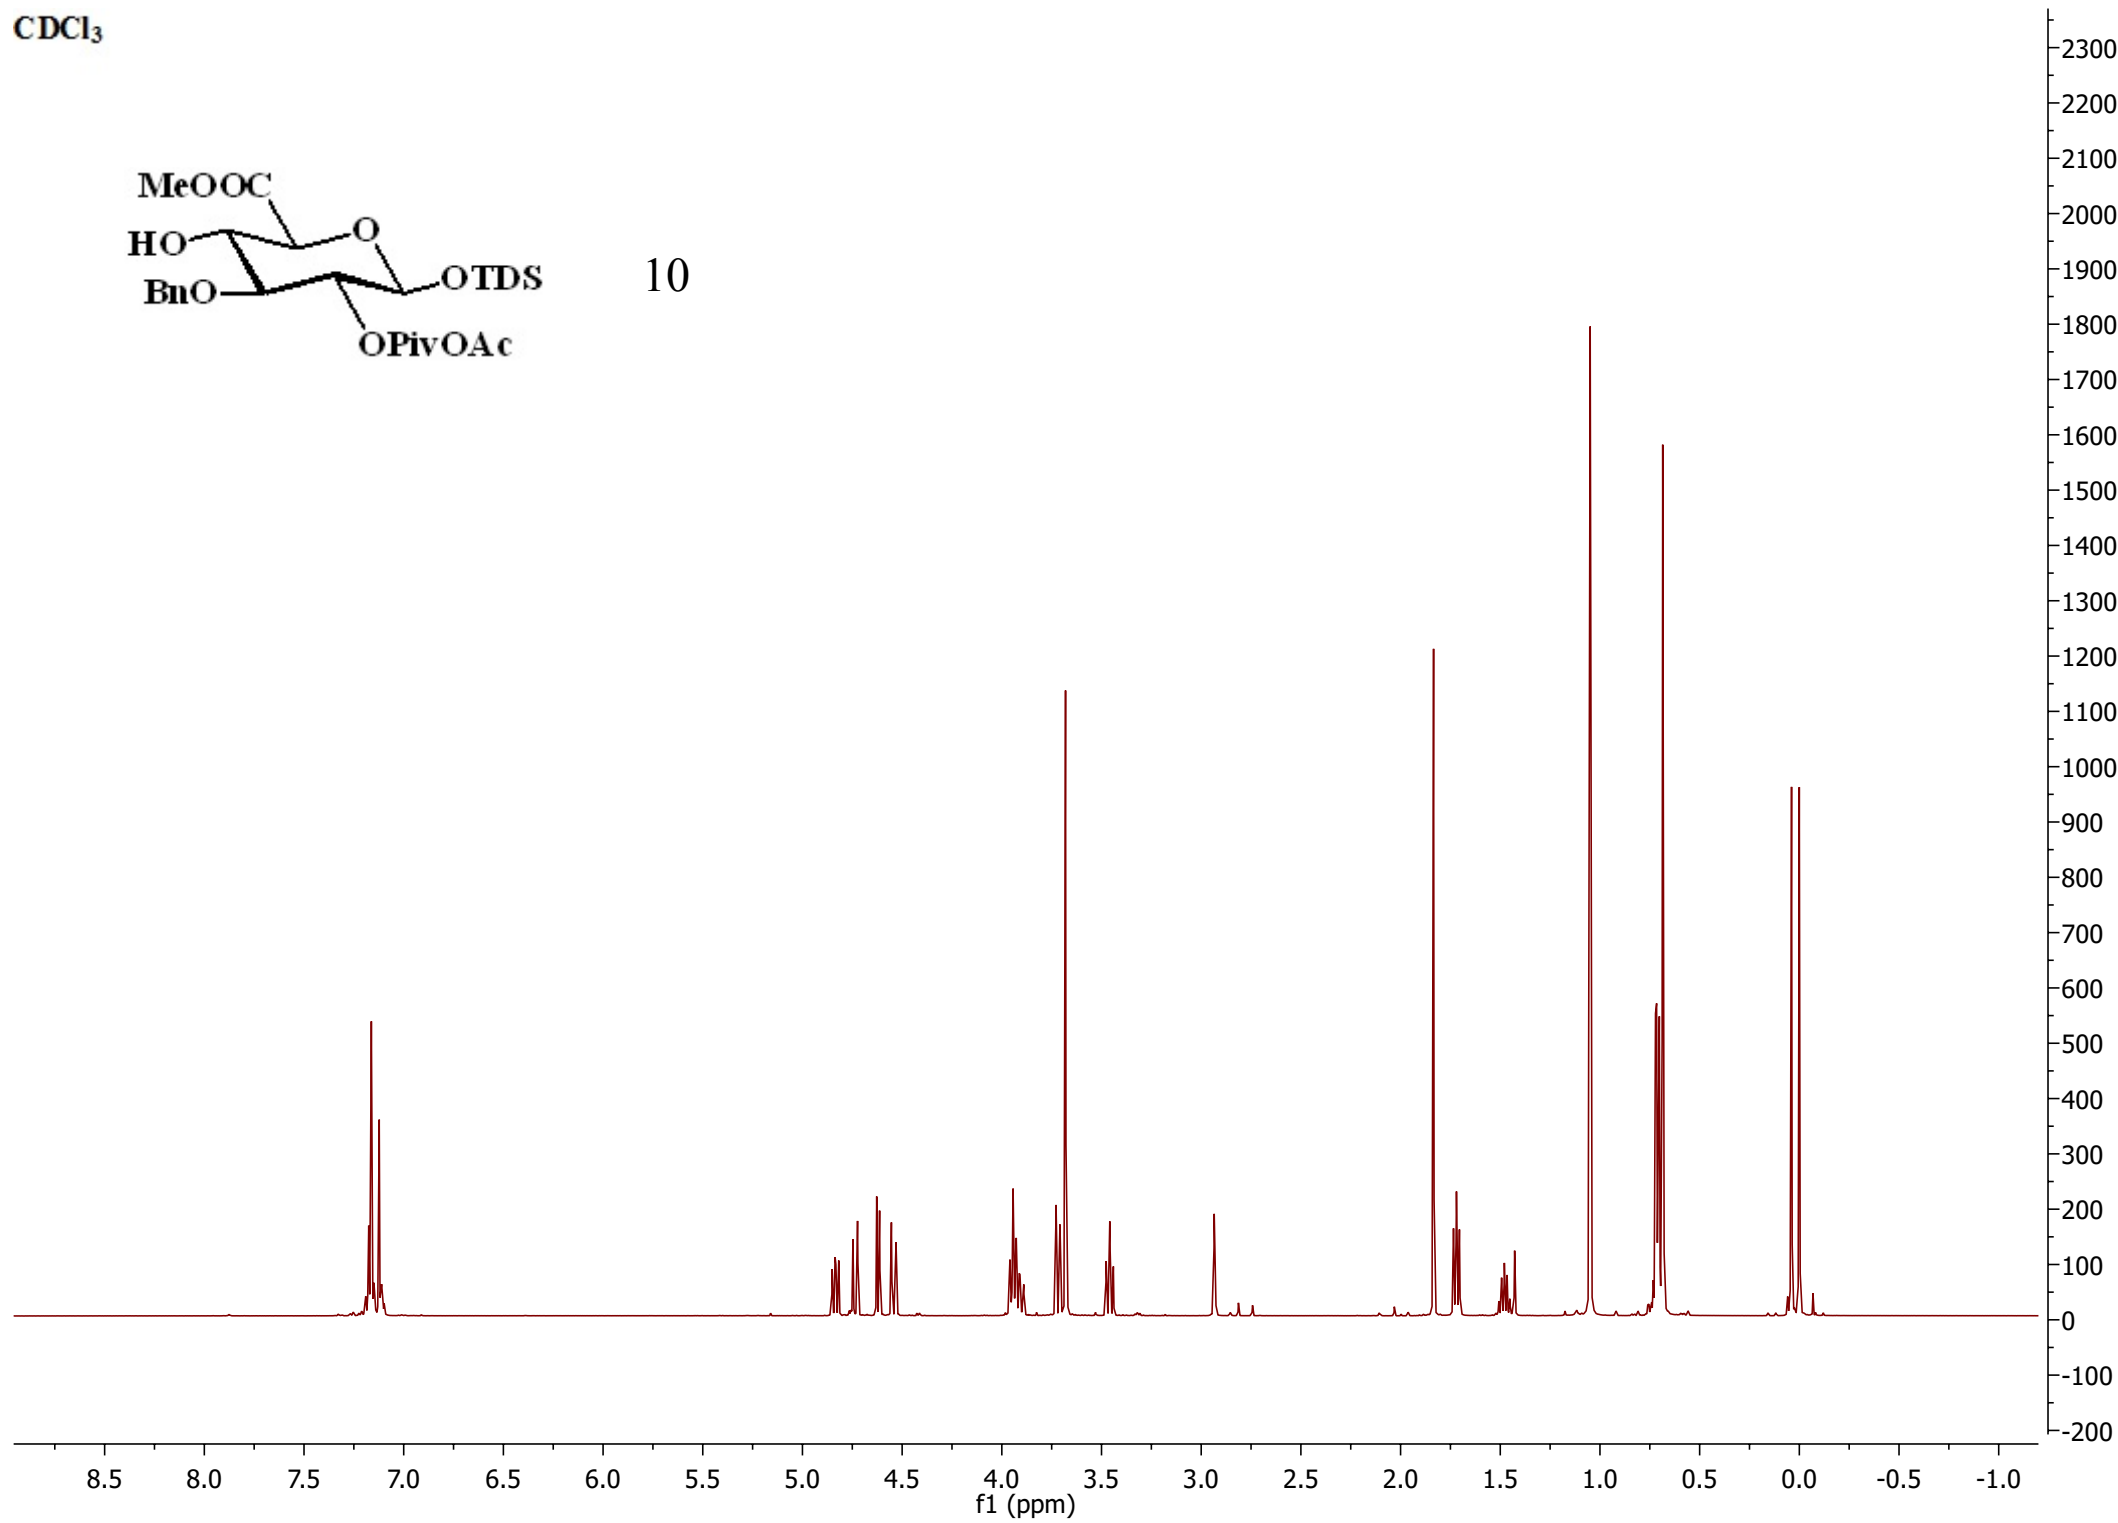

CDCl<sub>3</sub>

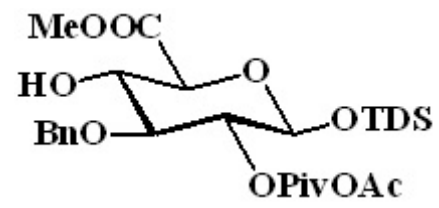

10

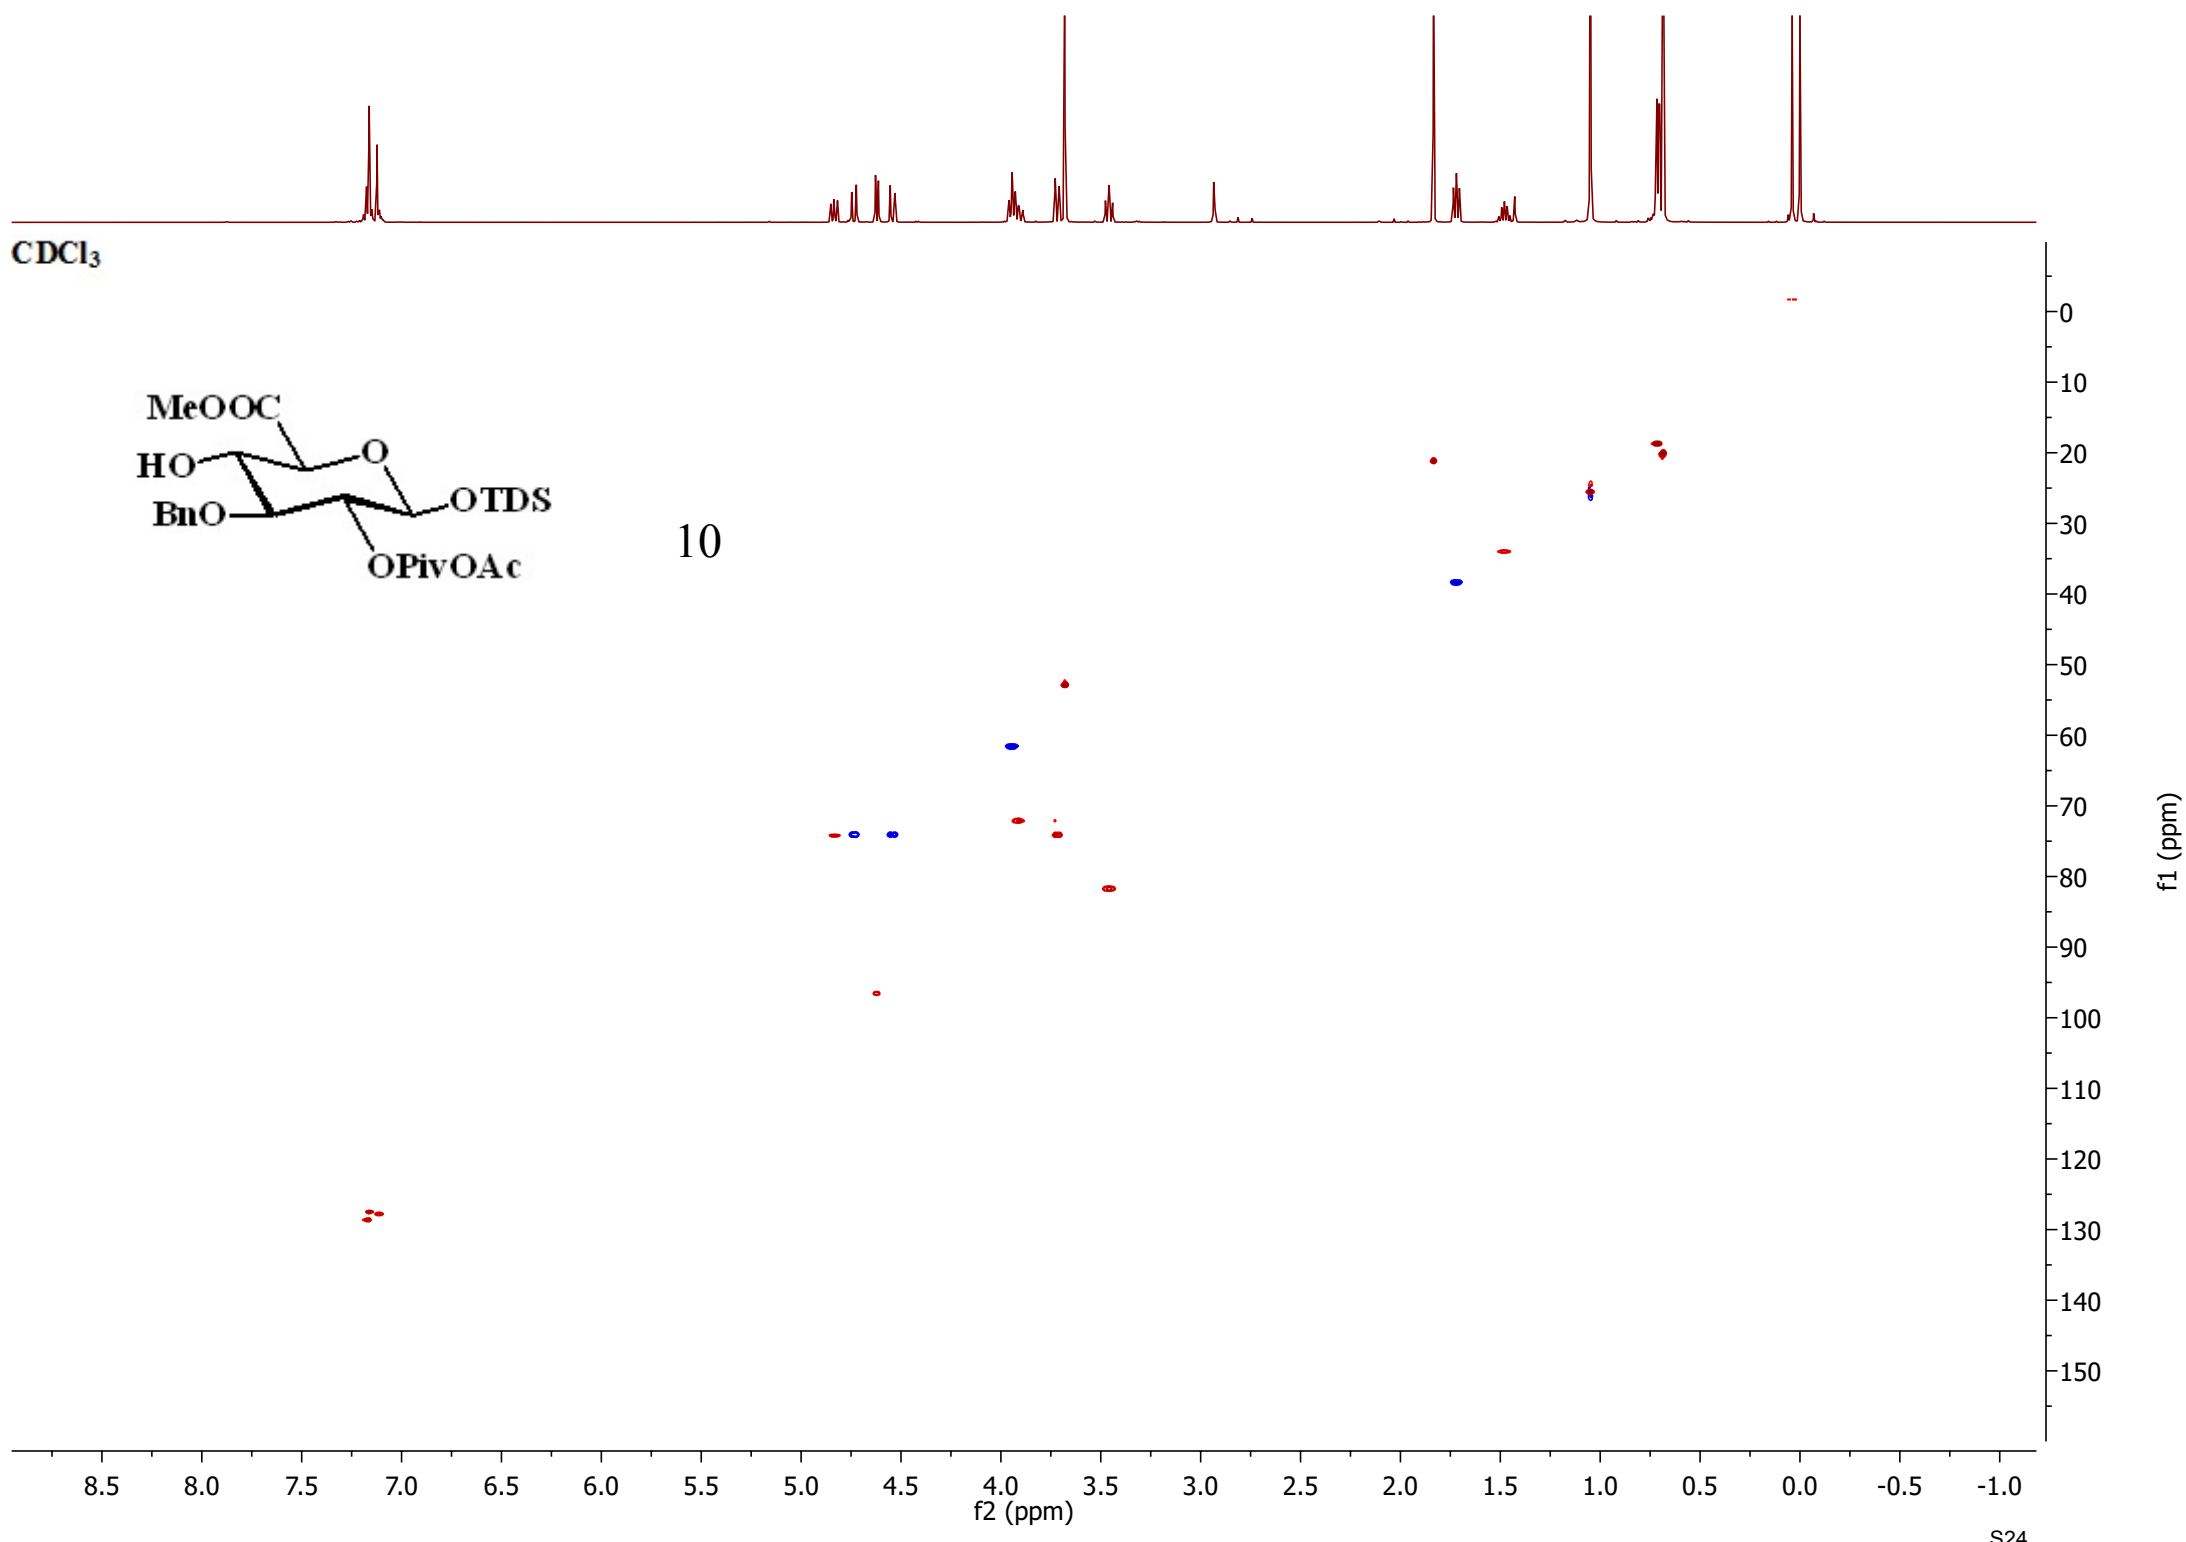



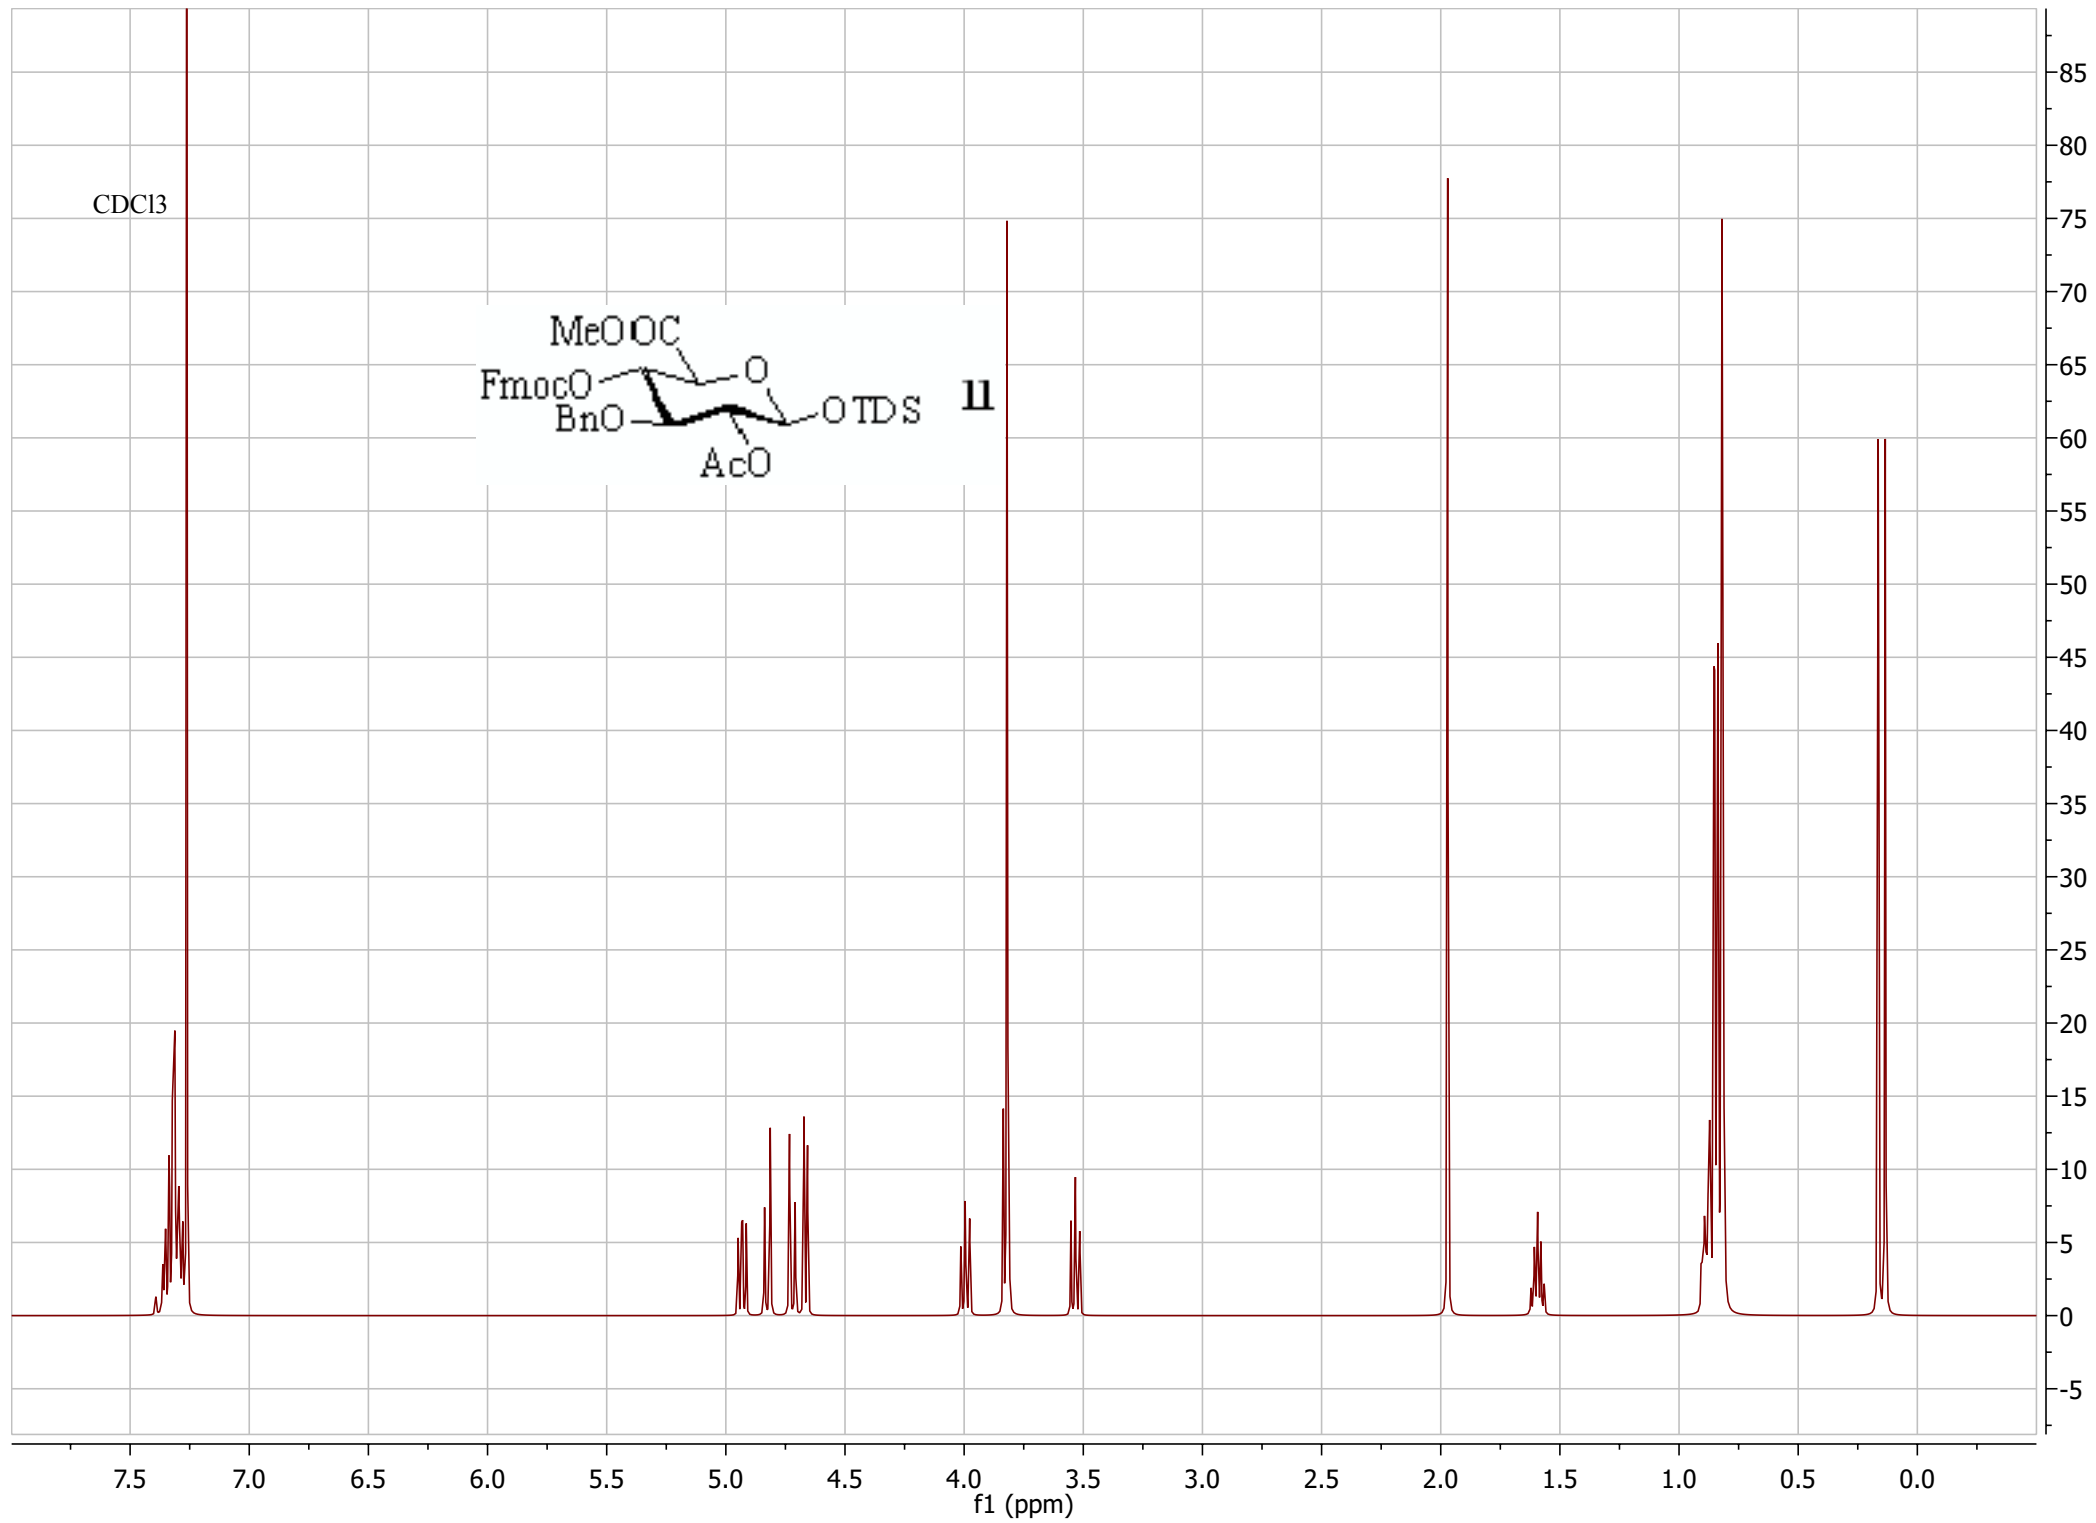

CDCl<sub>3</sub>

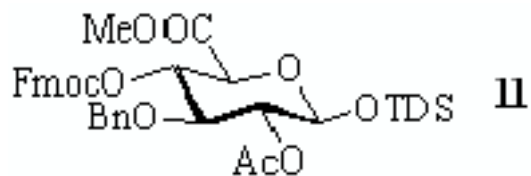

cz-3-53C\_HSQCAD\_20130922\_01  
cz-3-53C



CDCl<sub>3</sub>

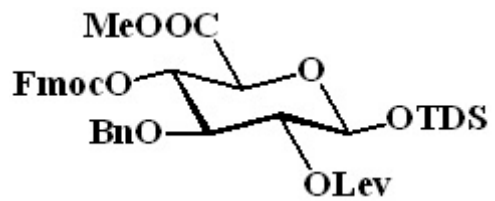

12

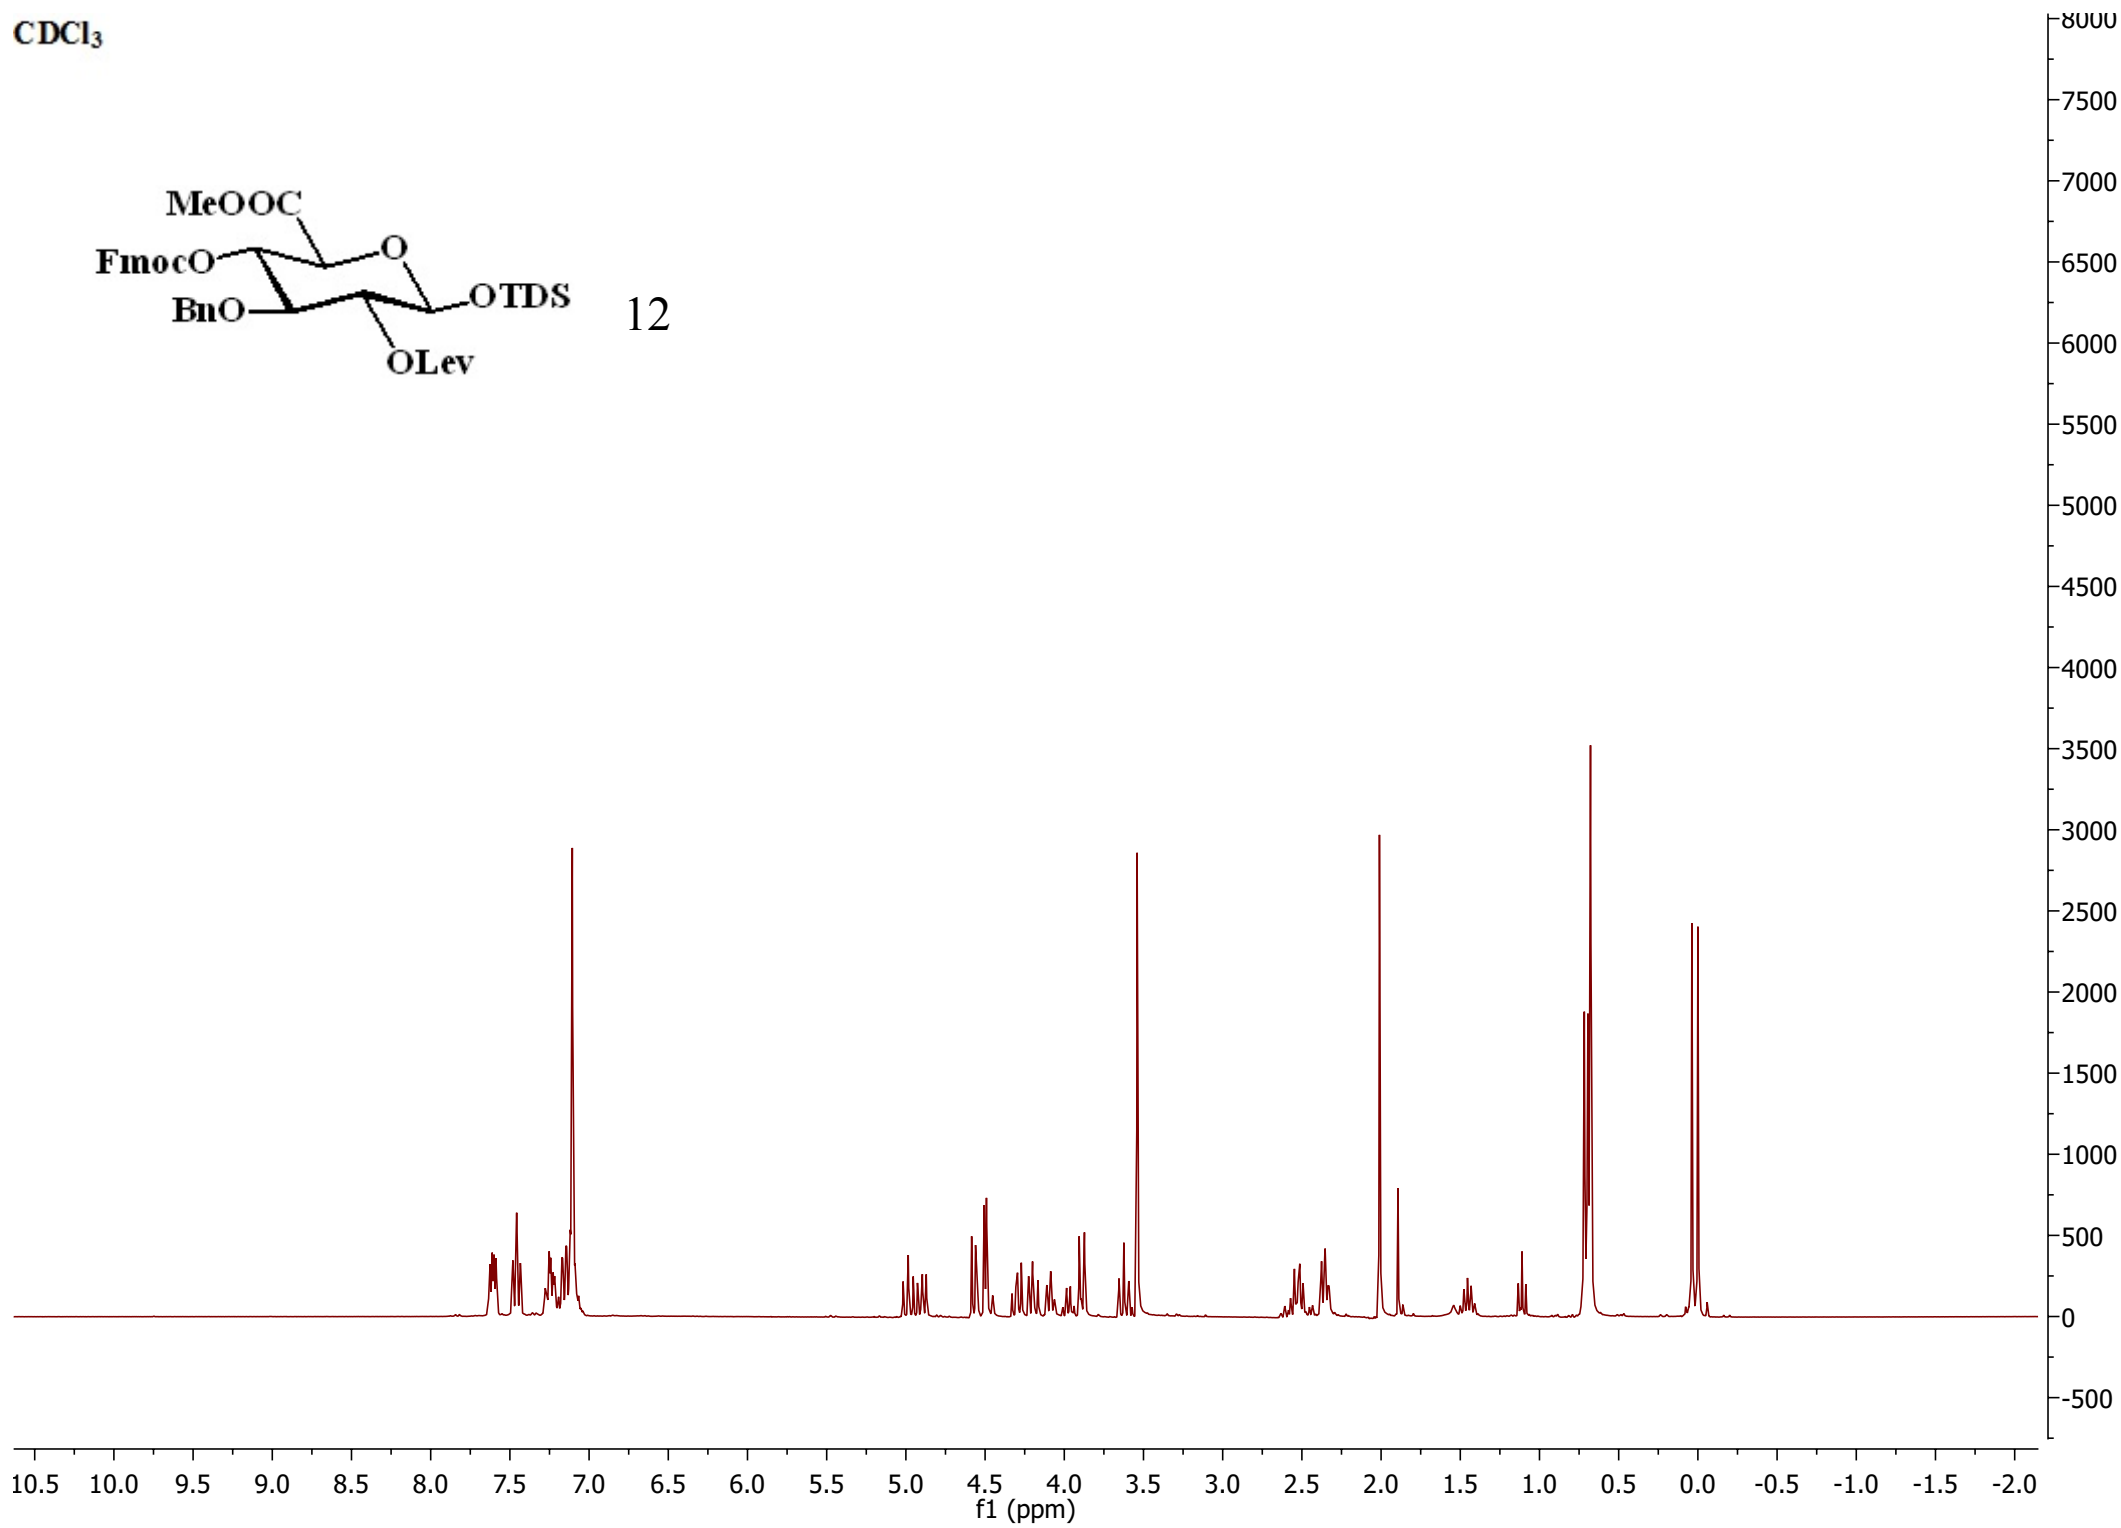

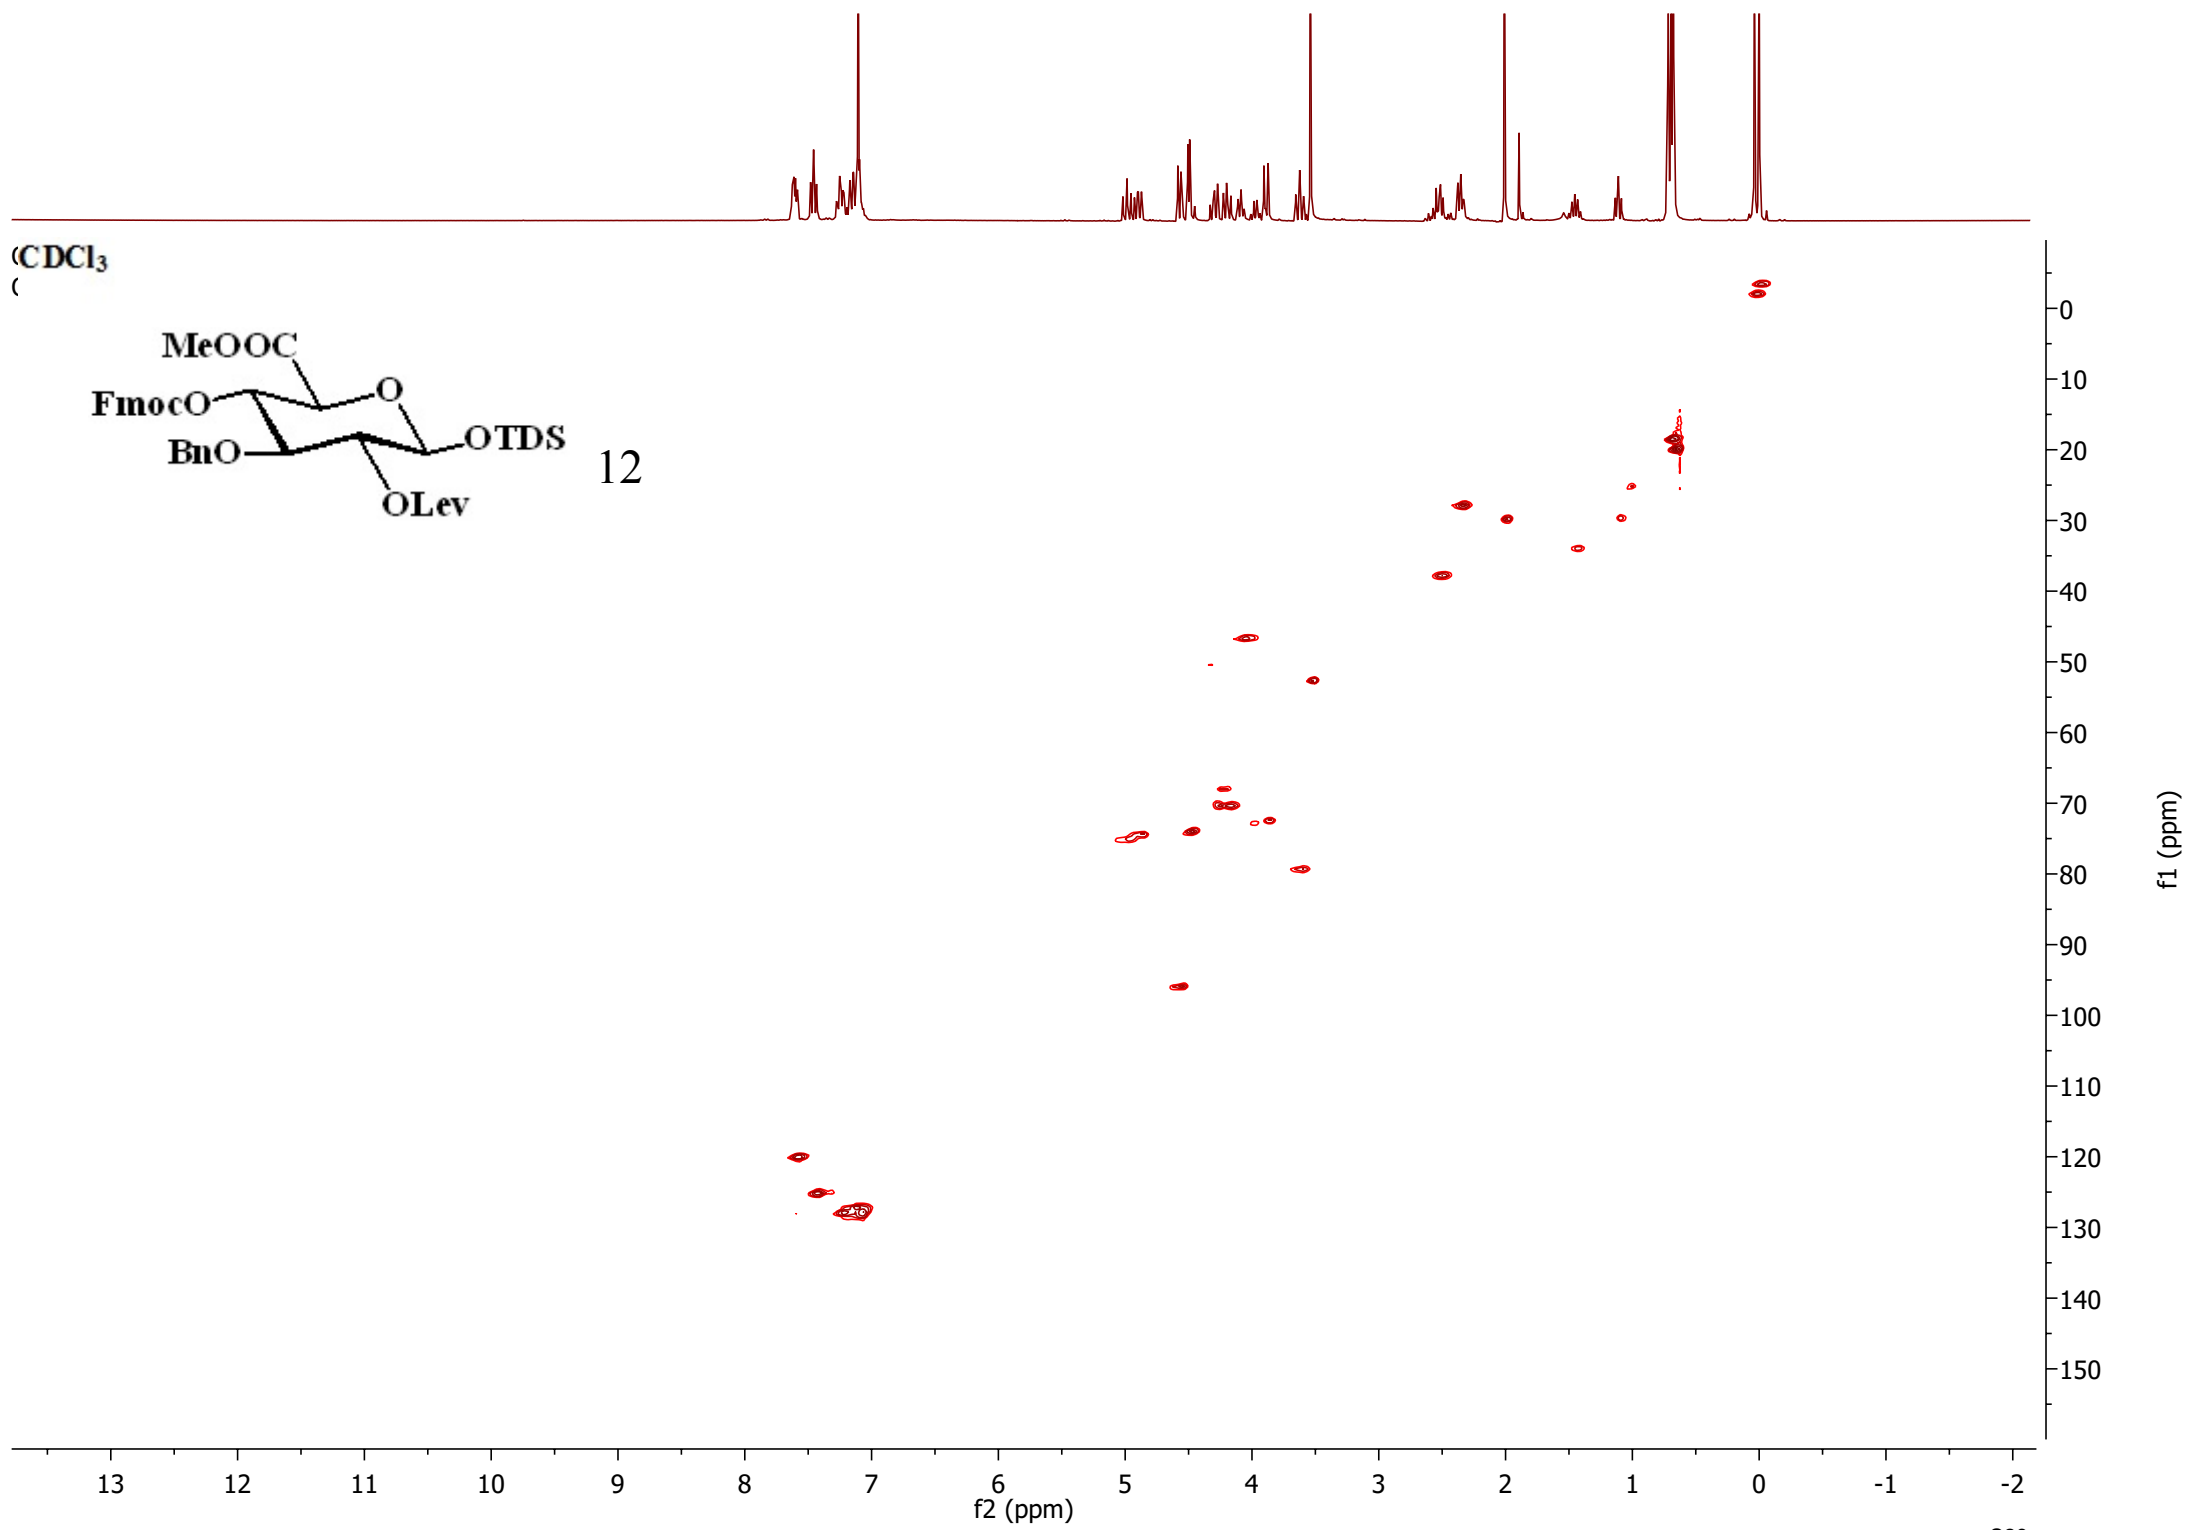

CDCl<sub>3</sub>

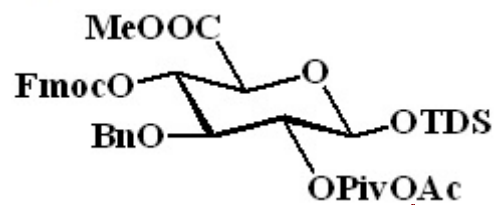

13

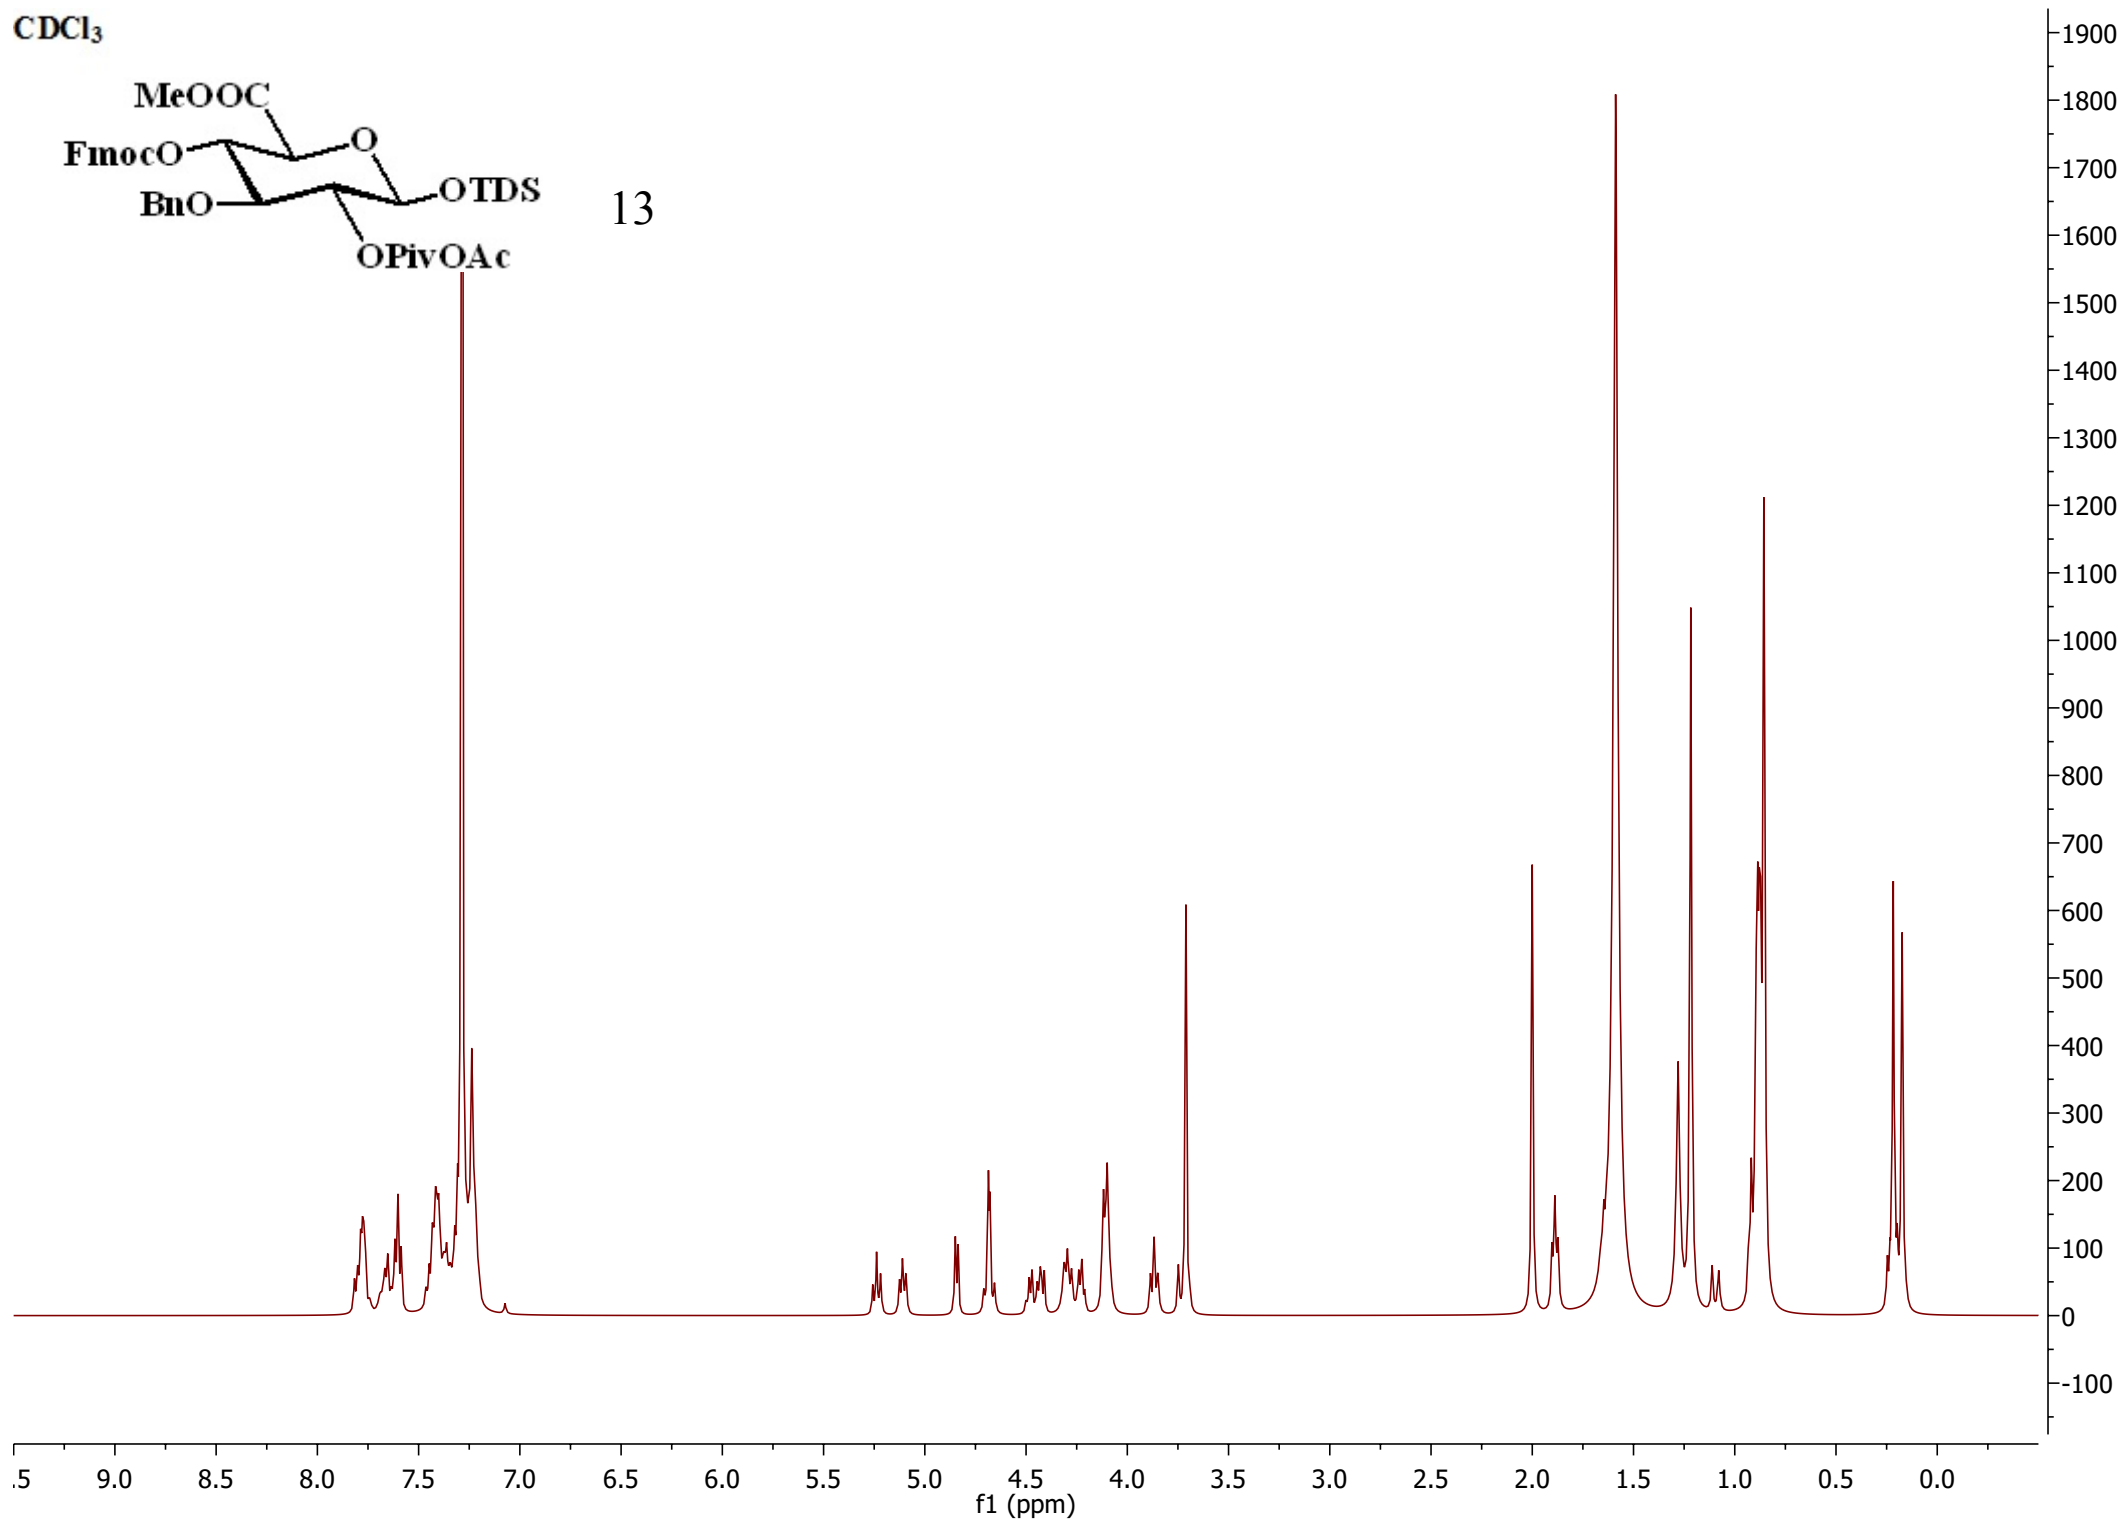

CDCl<sub>3</sub>

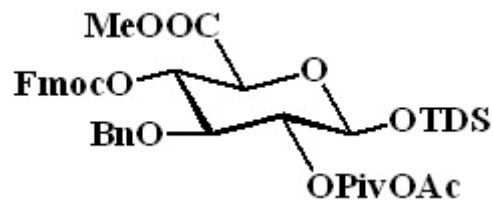

13

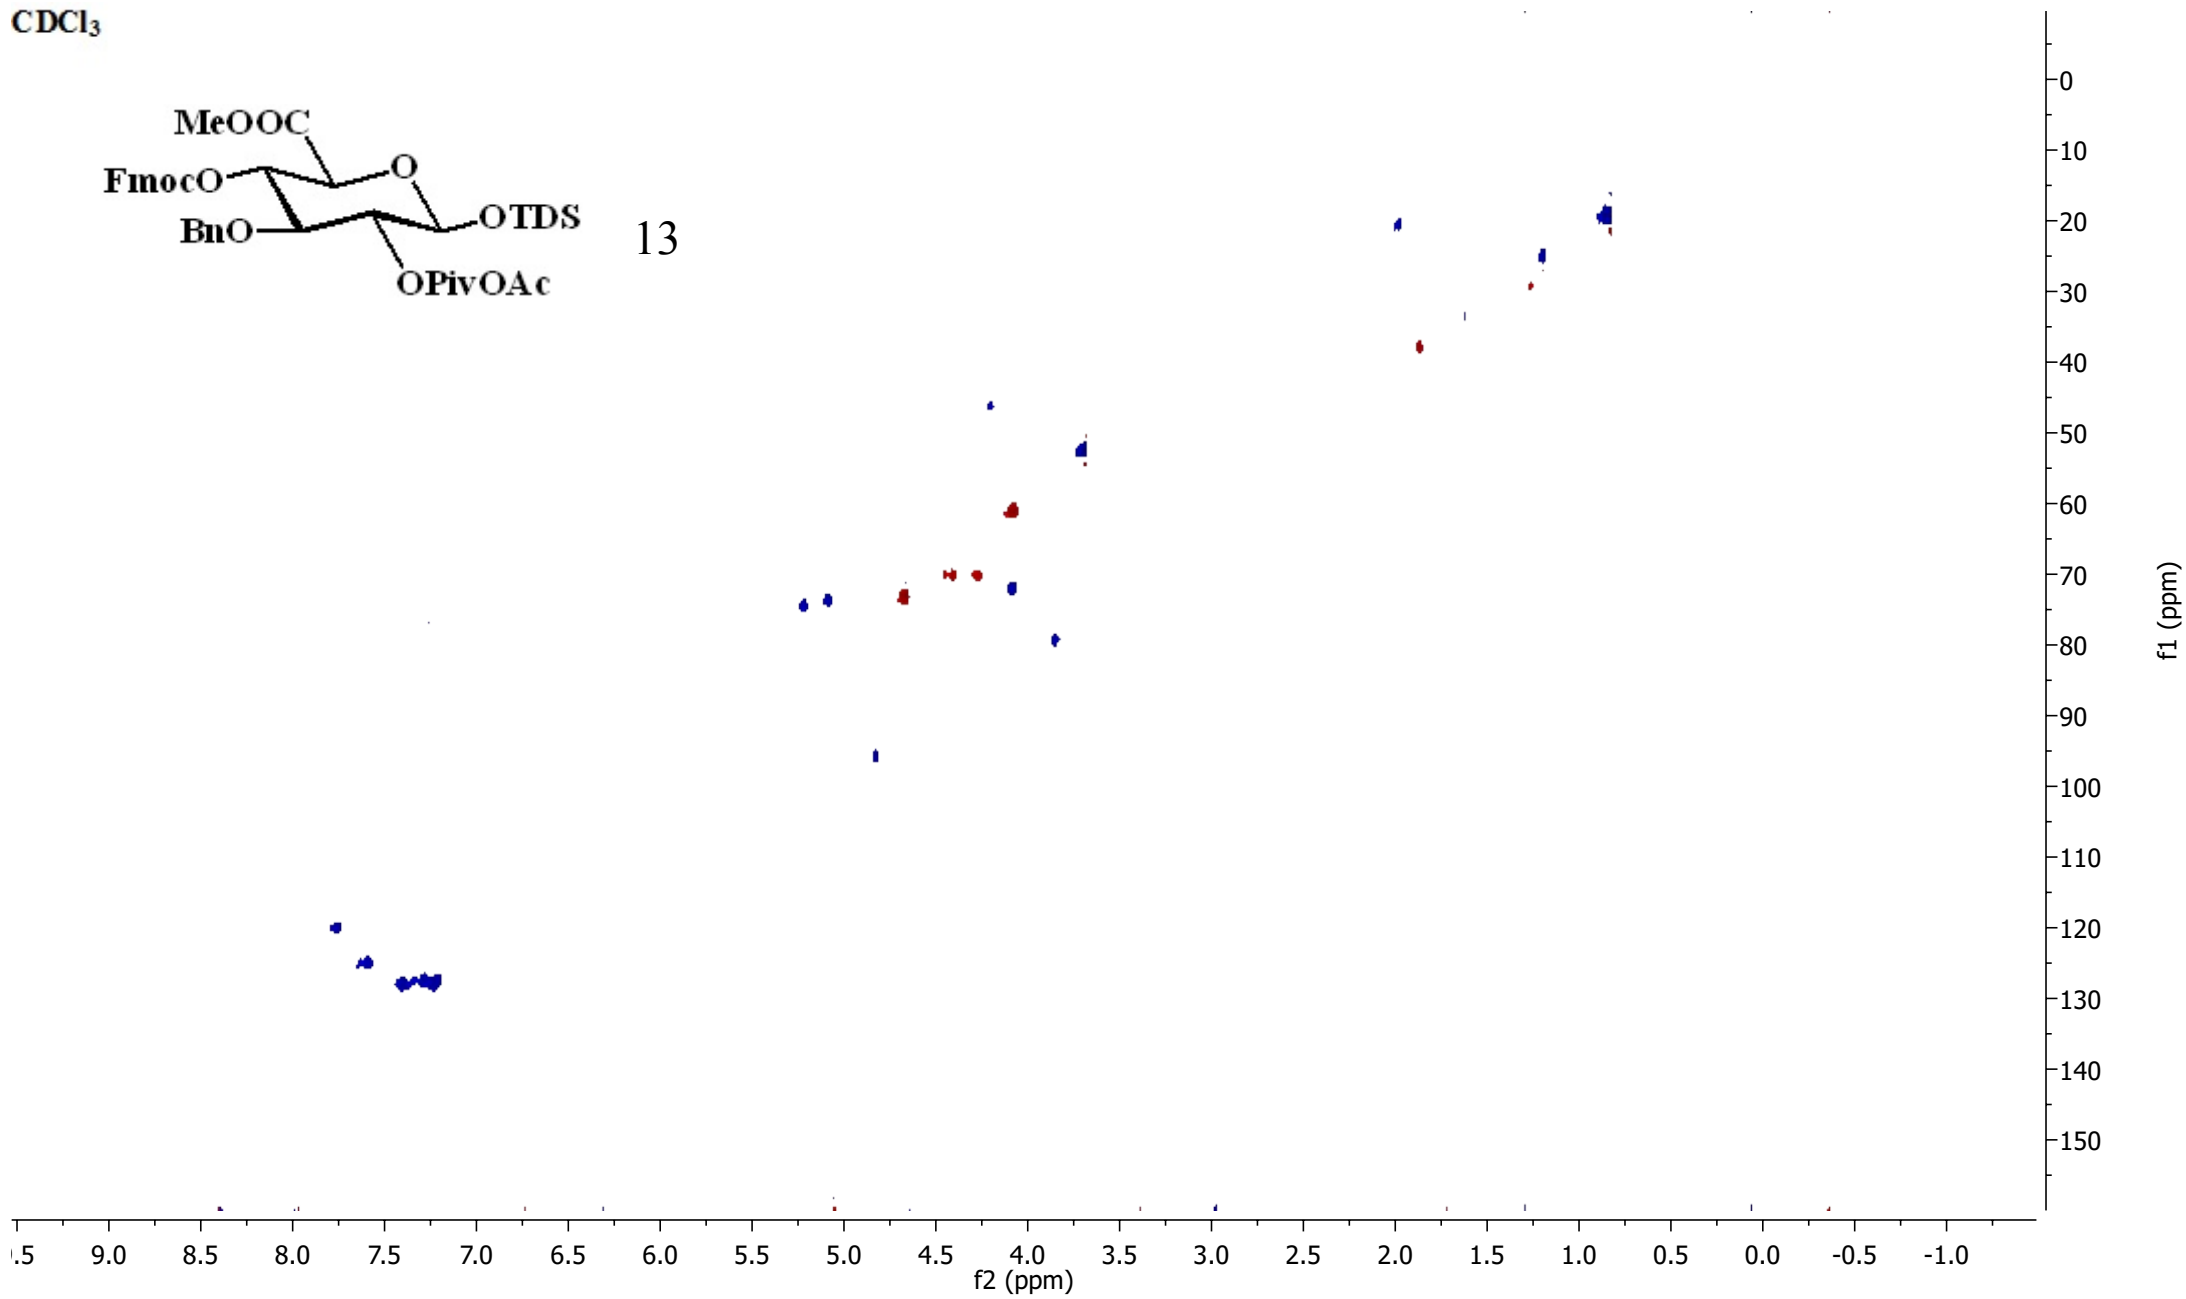

CDCl<sub>3</sub>

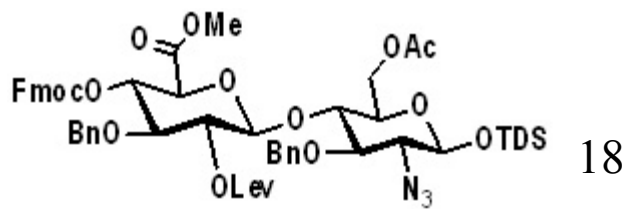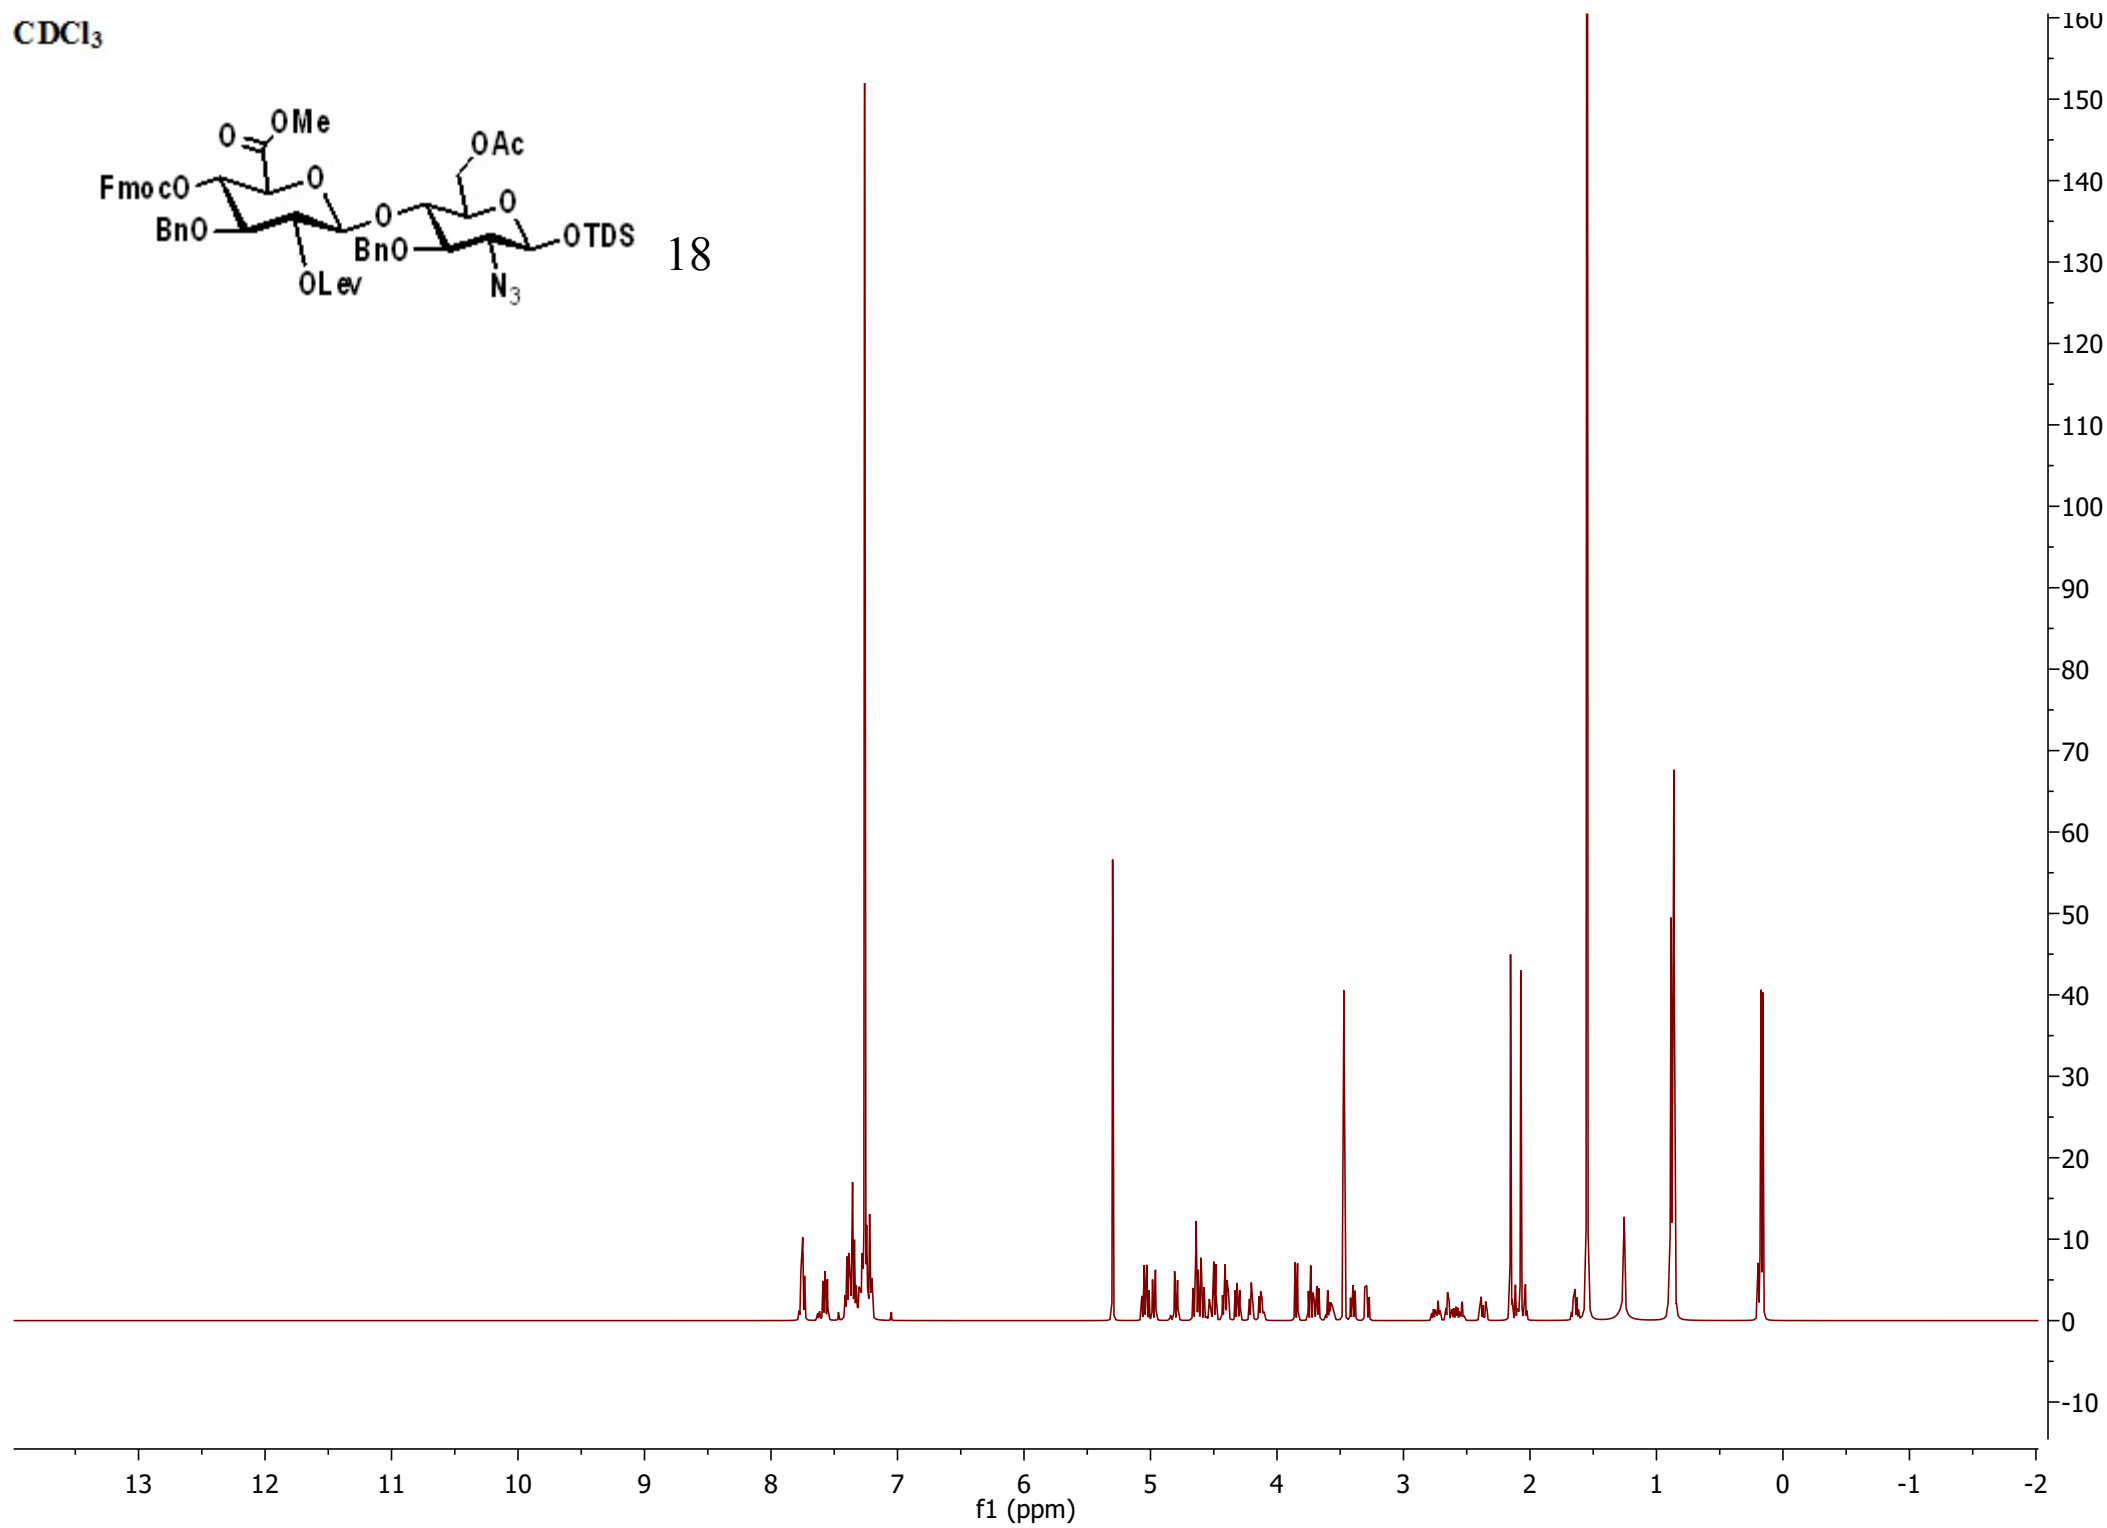

CDCl<sub>3</sub>

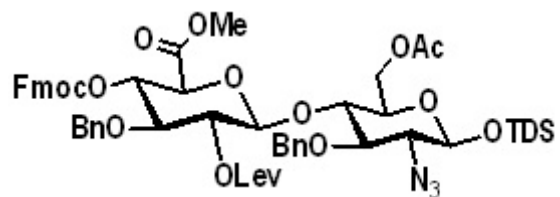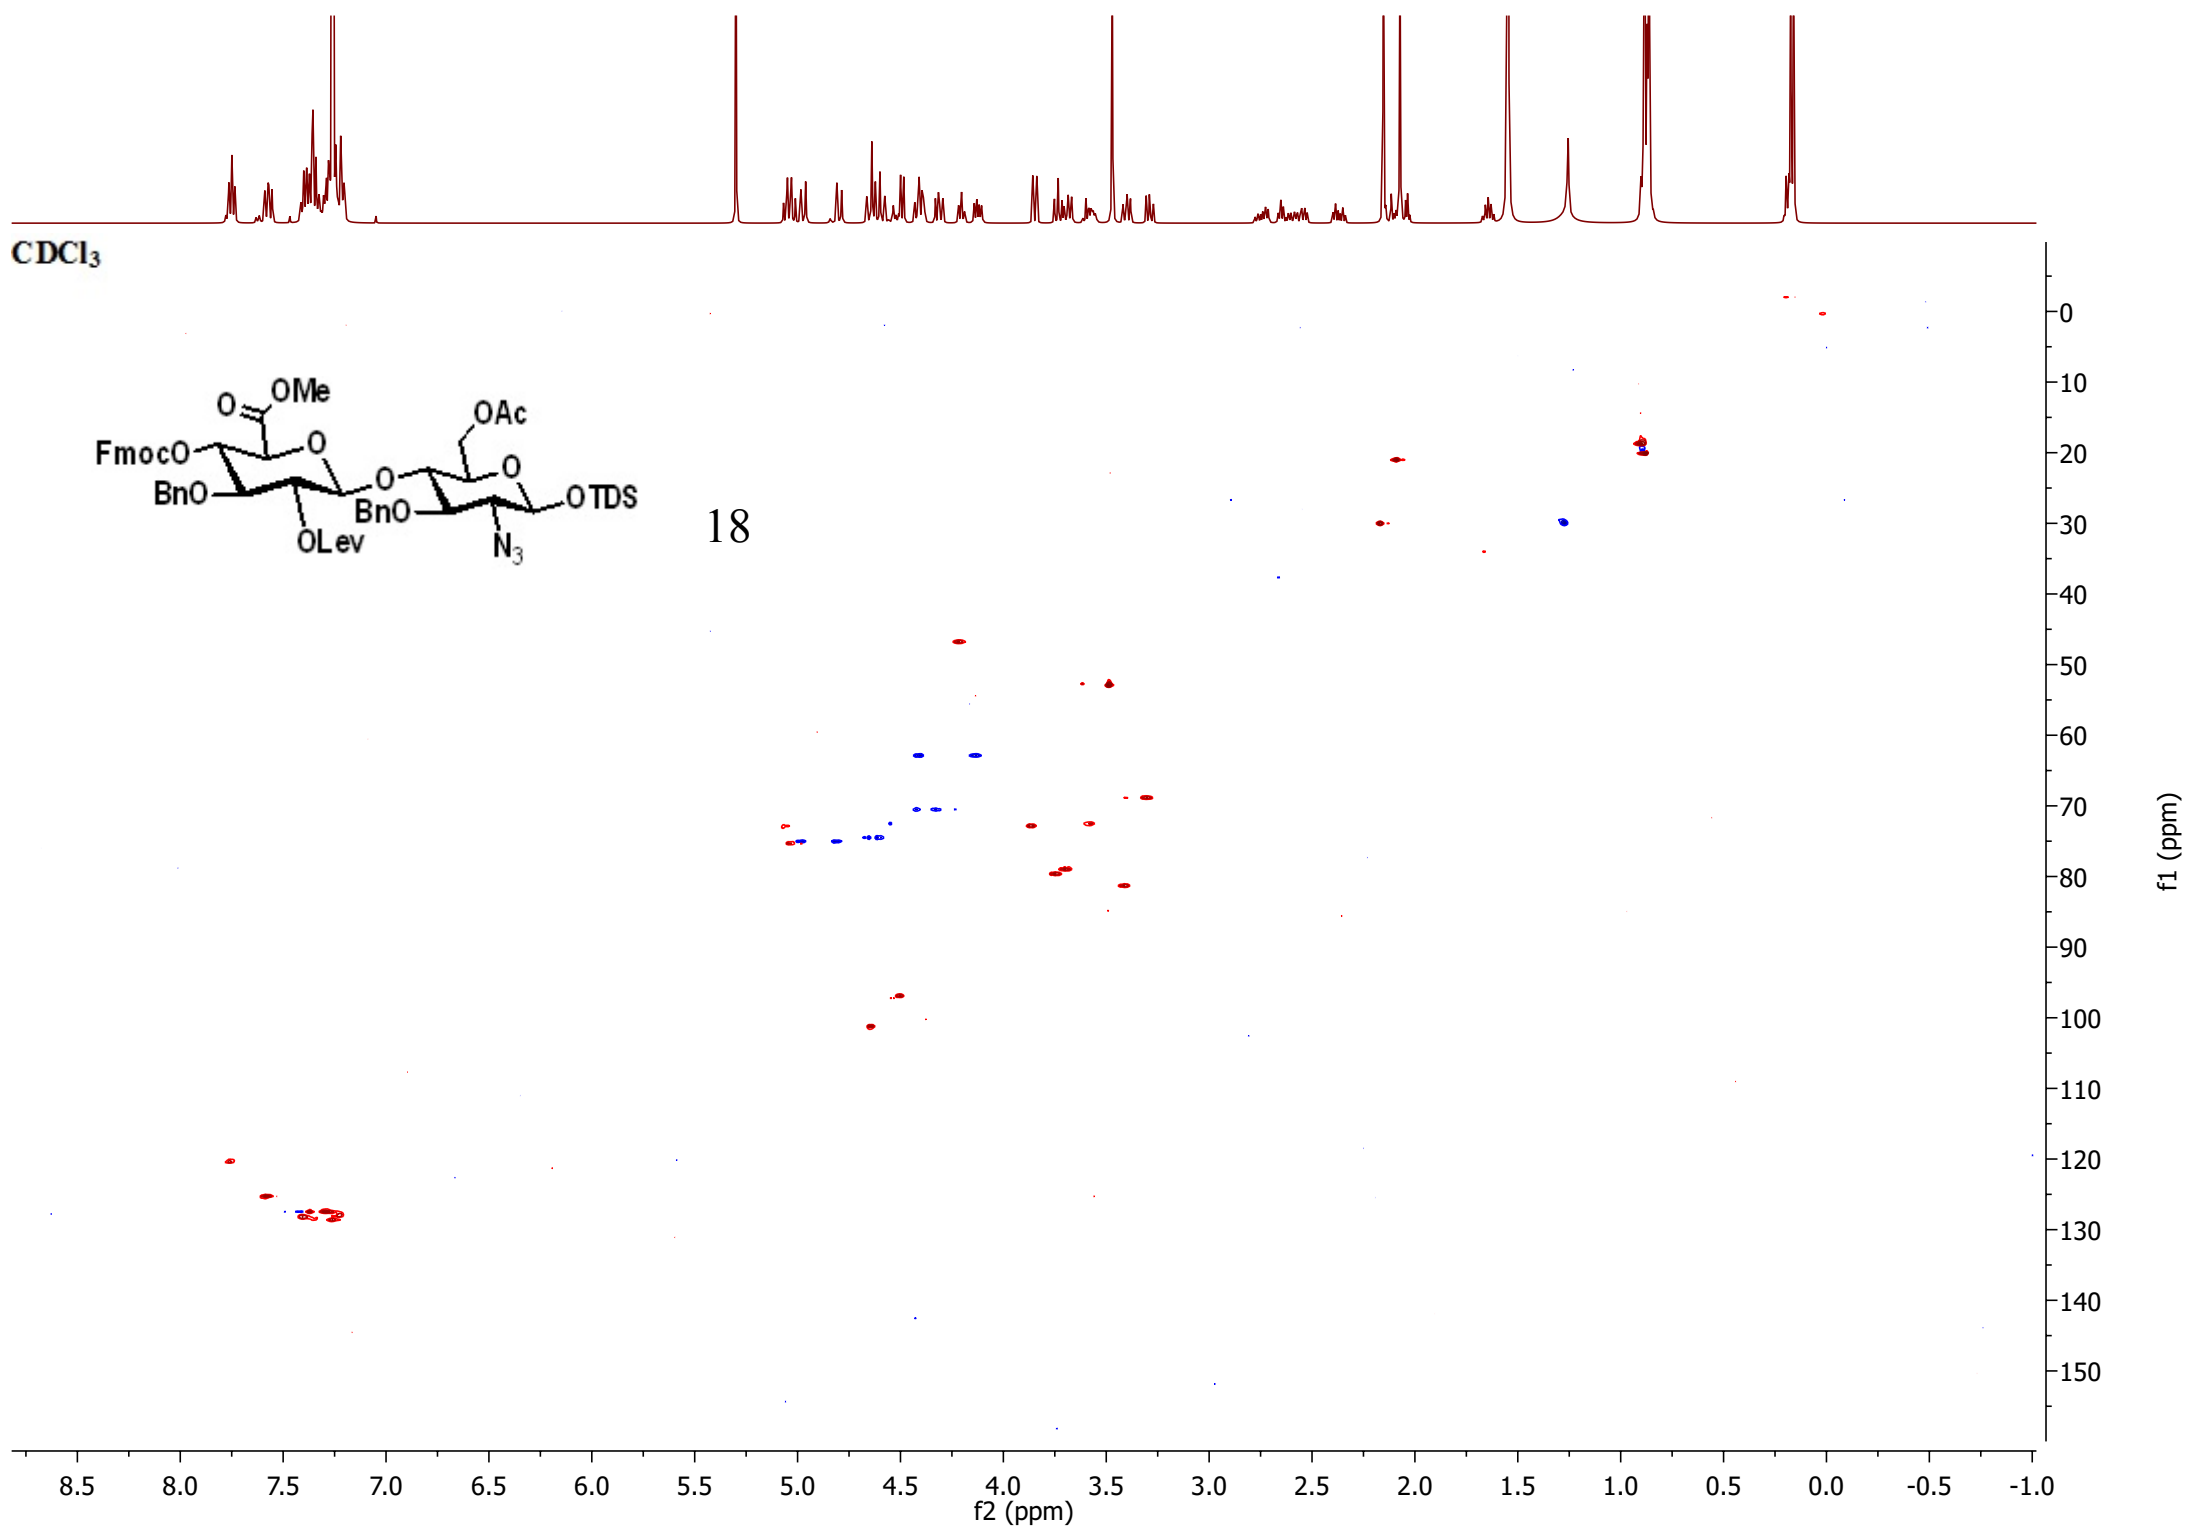



CDCl<sub>3</sub>

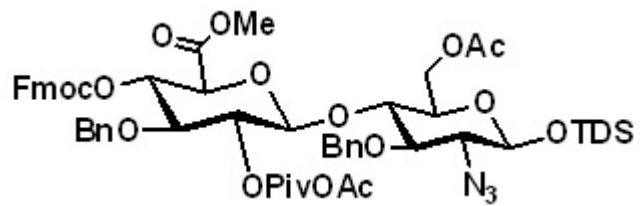

20

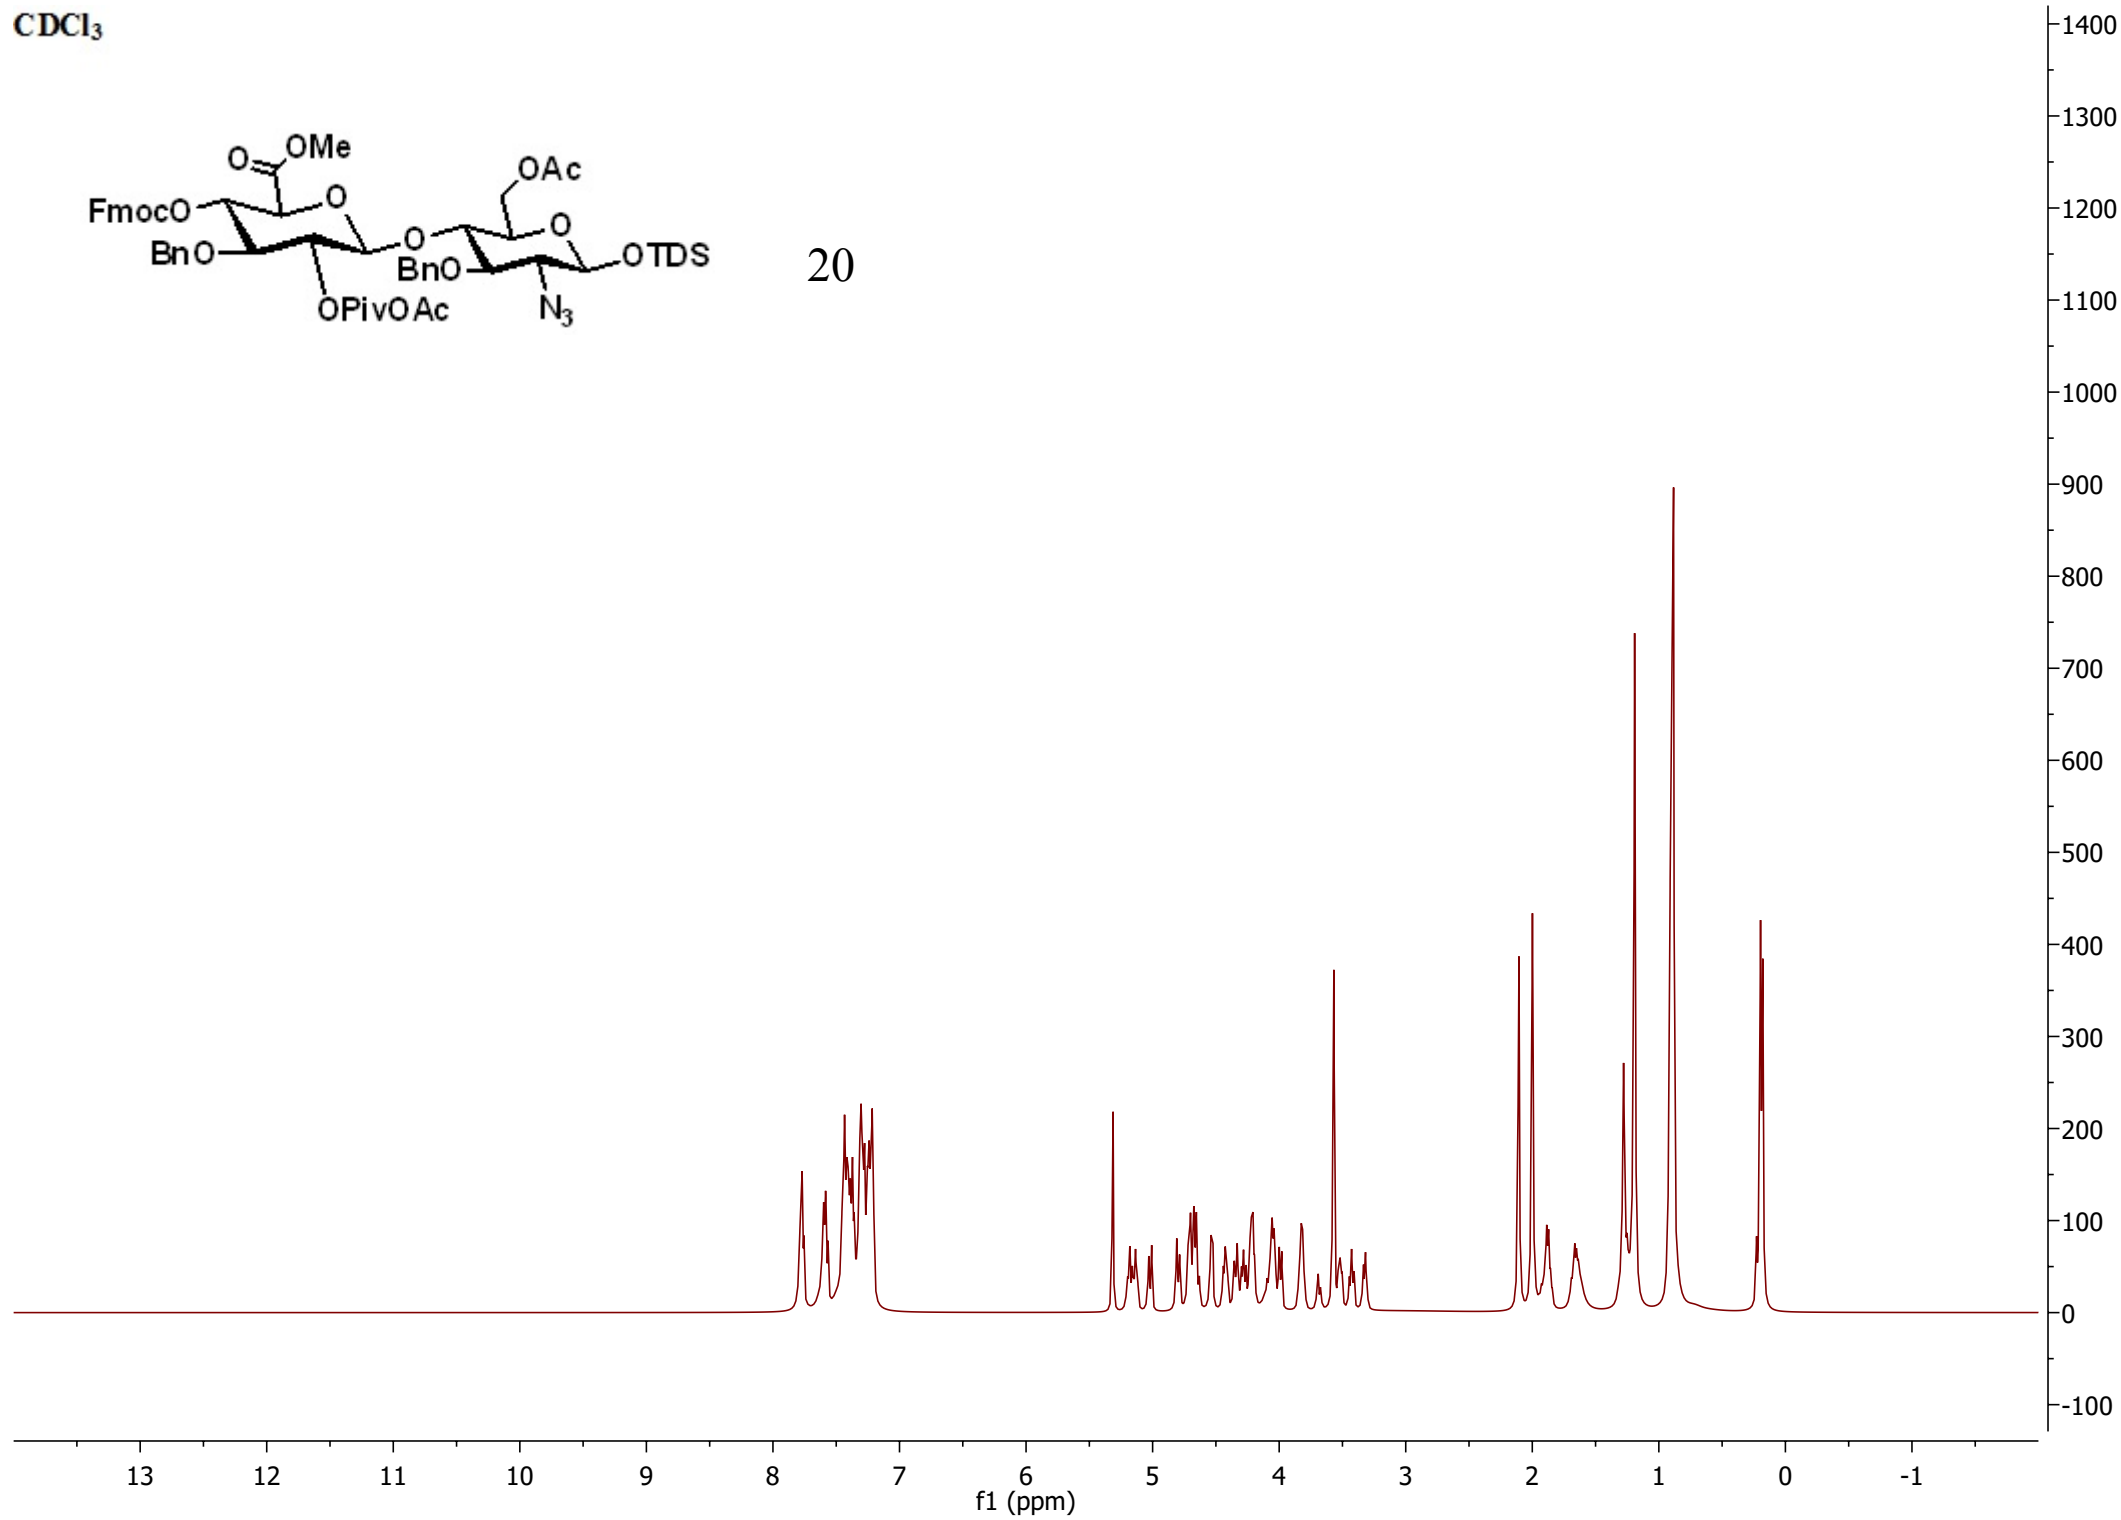

CDCl<sub>3</sub>

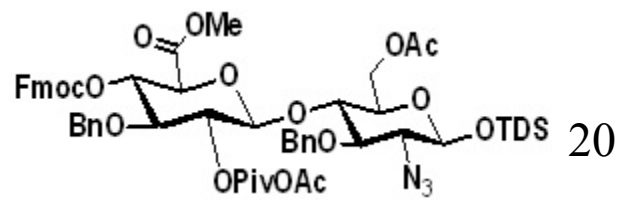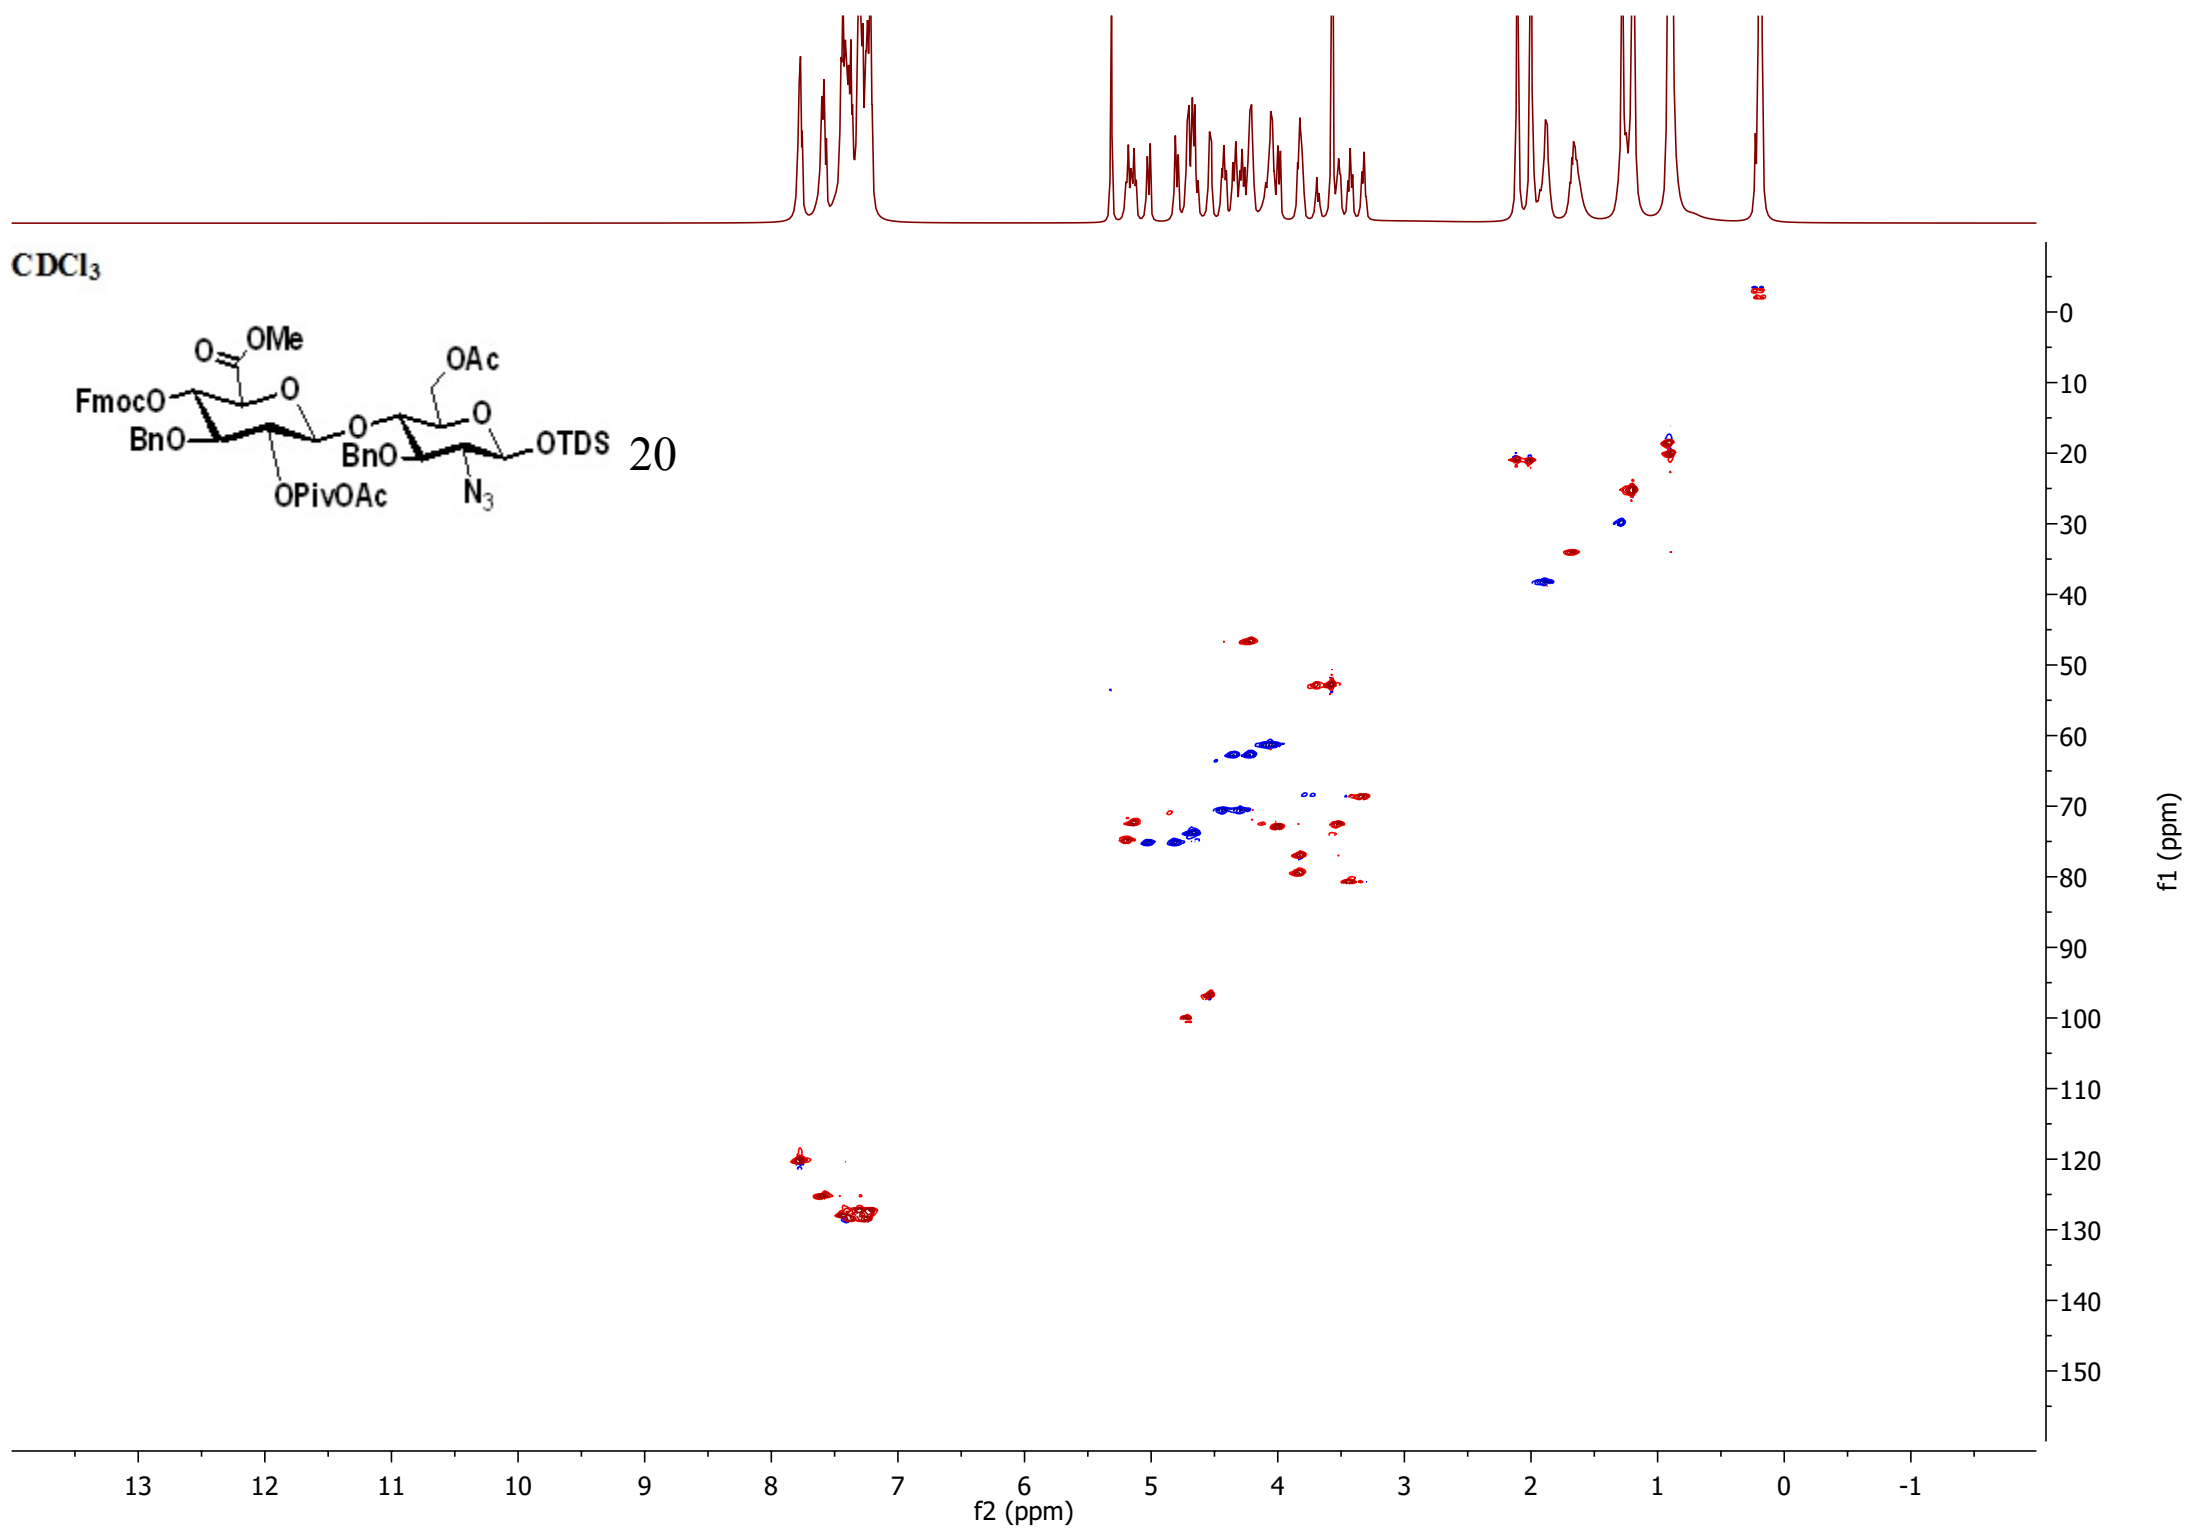

CDCl<sub>3</sub>

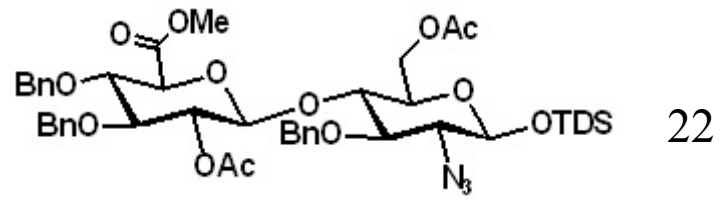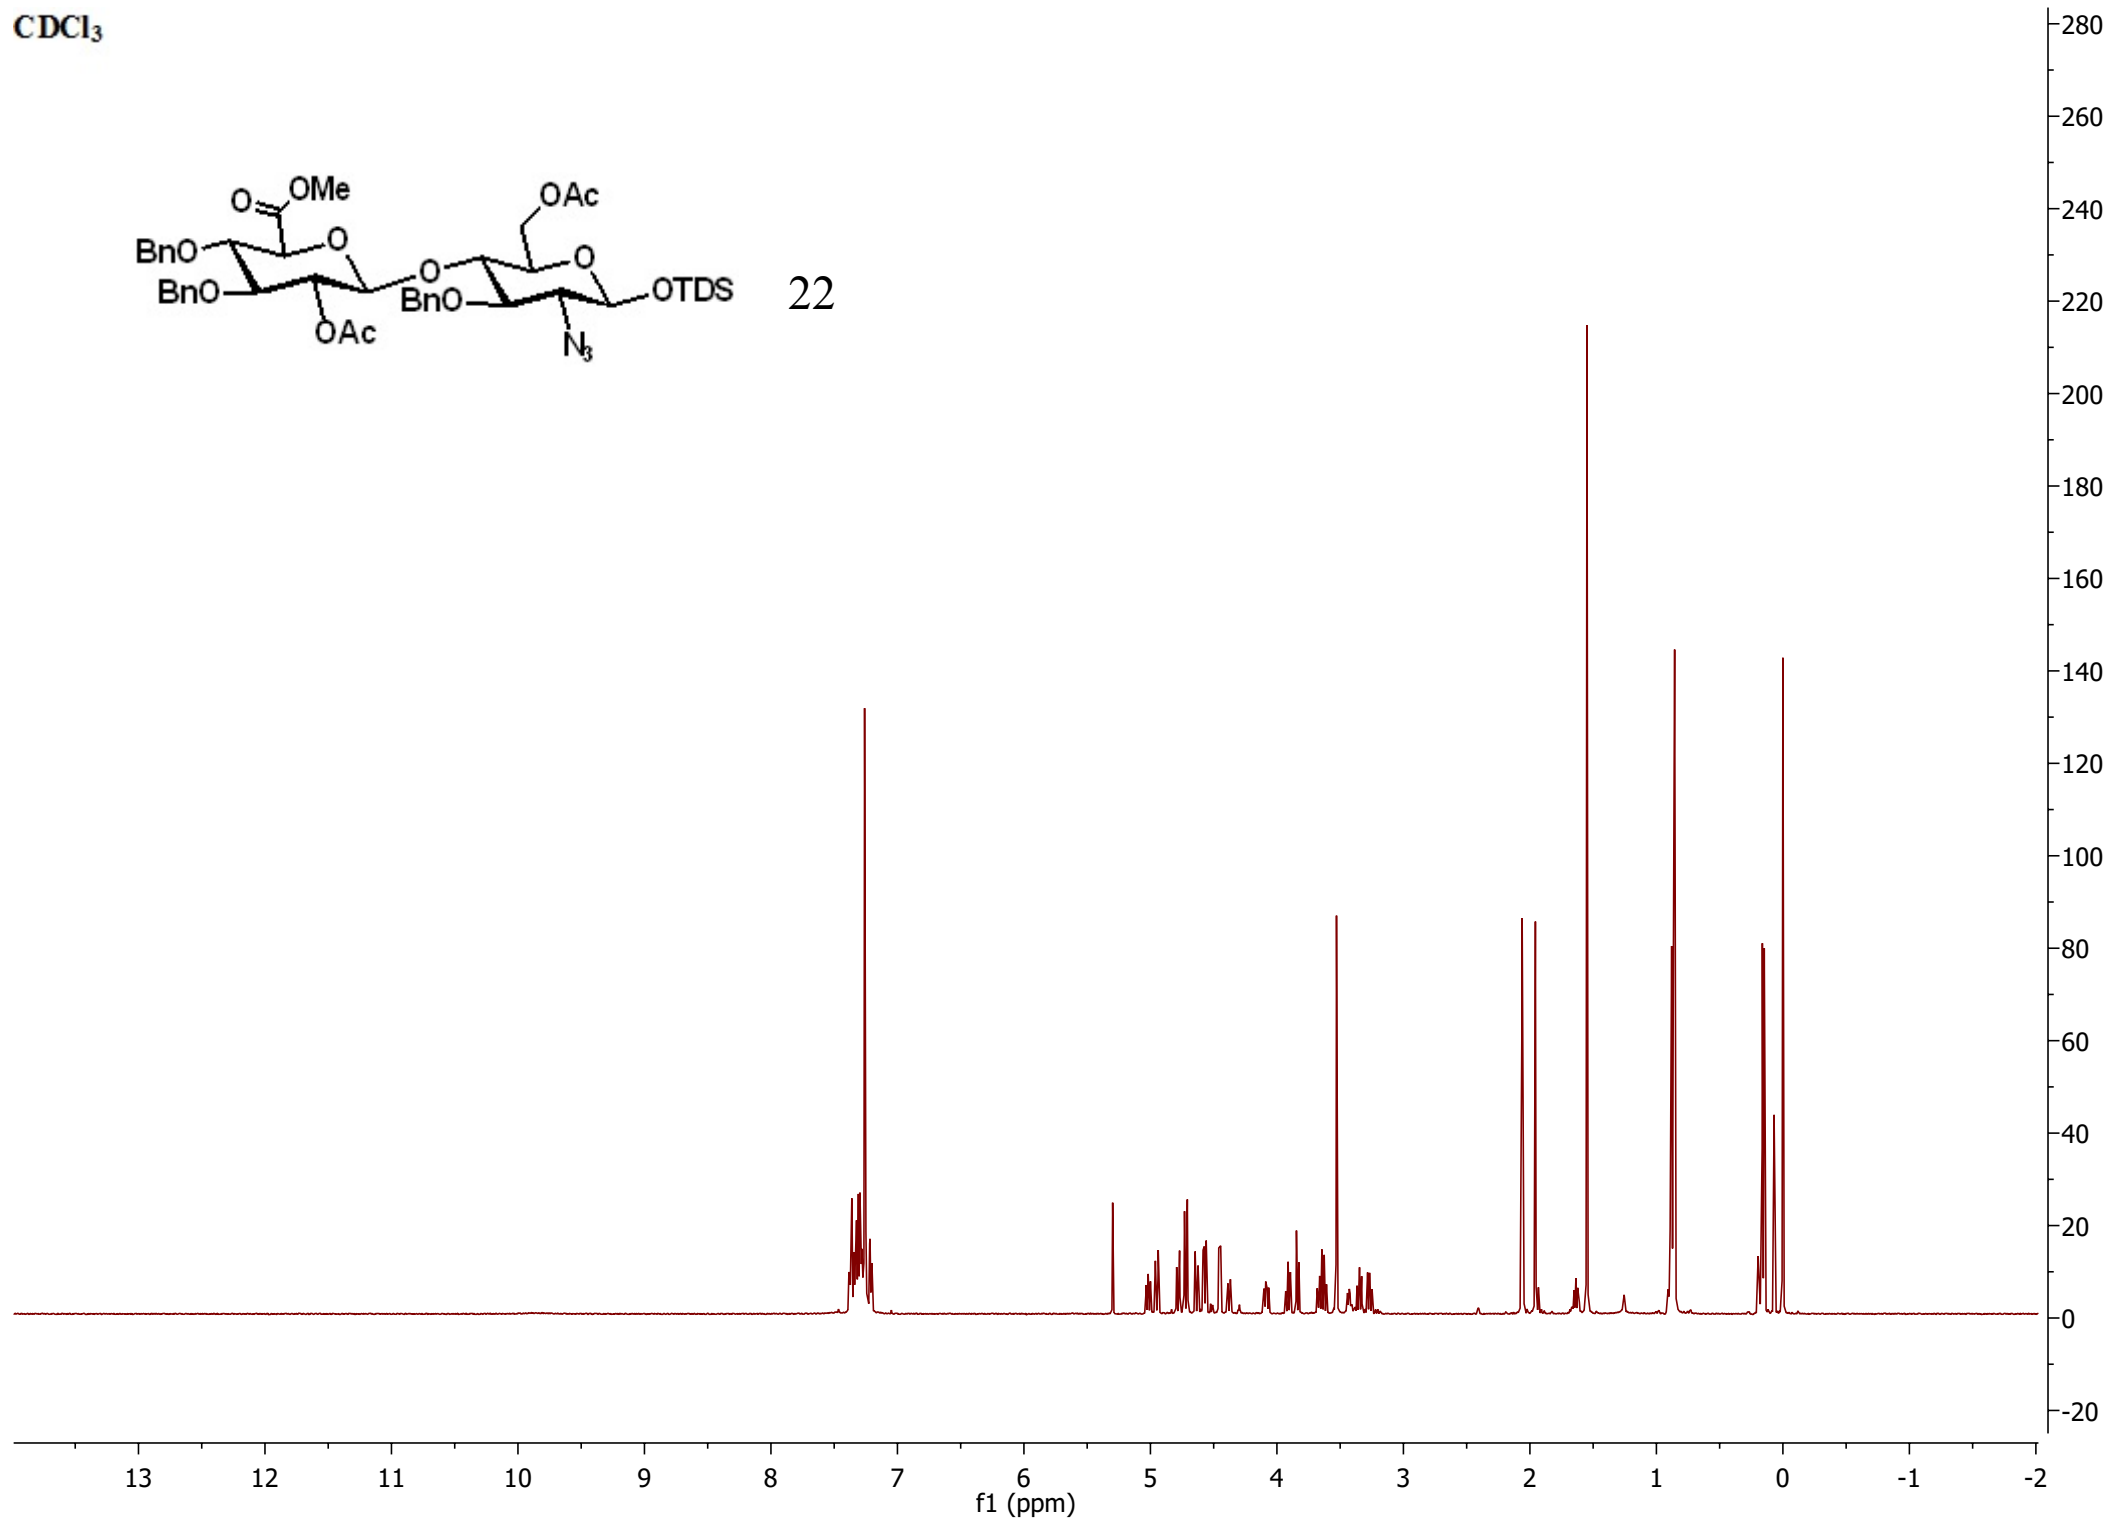

CDCl<sub>3</sub>

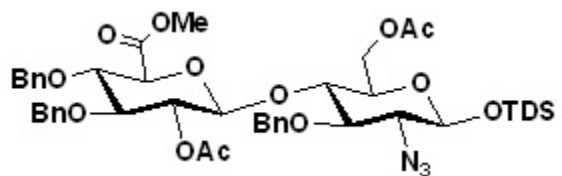

22

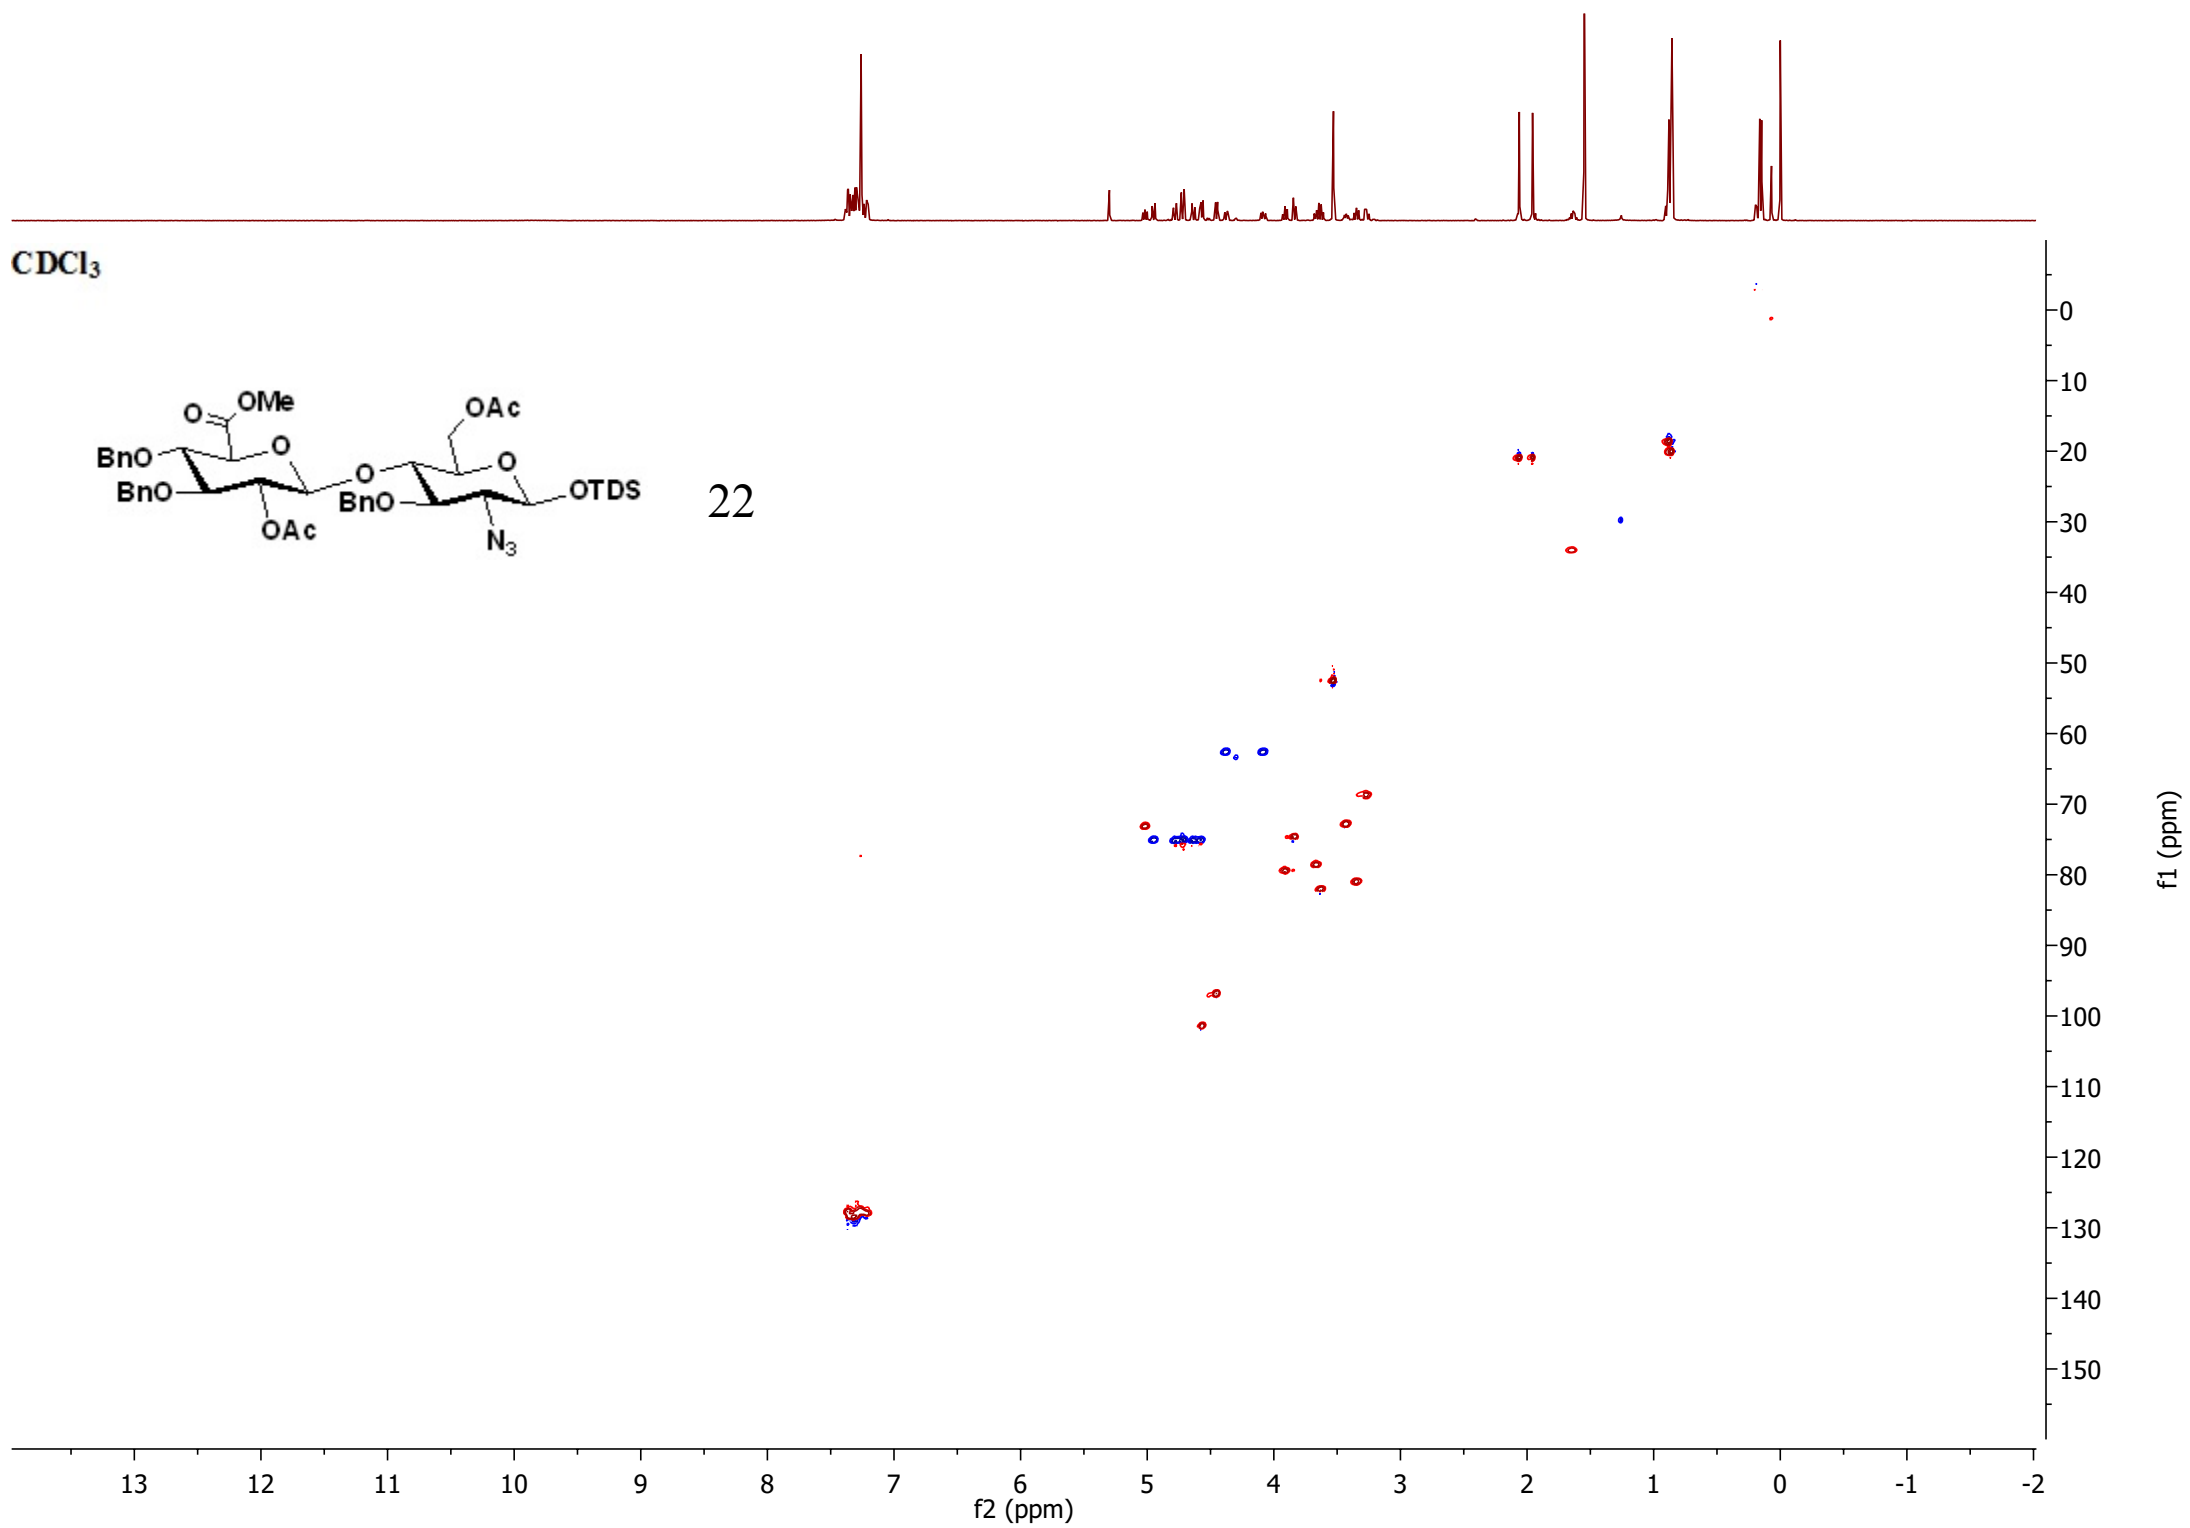

CDCl<sub>3</sub>

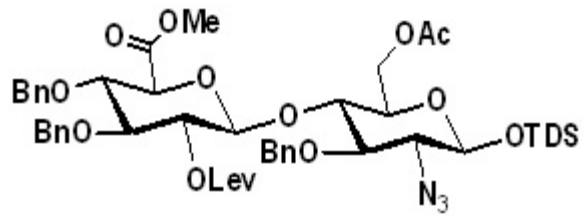

24

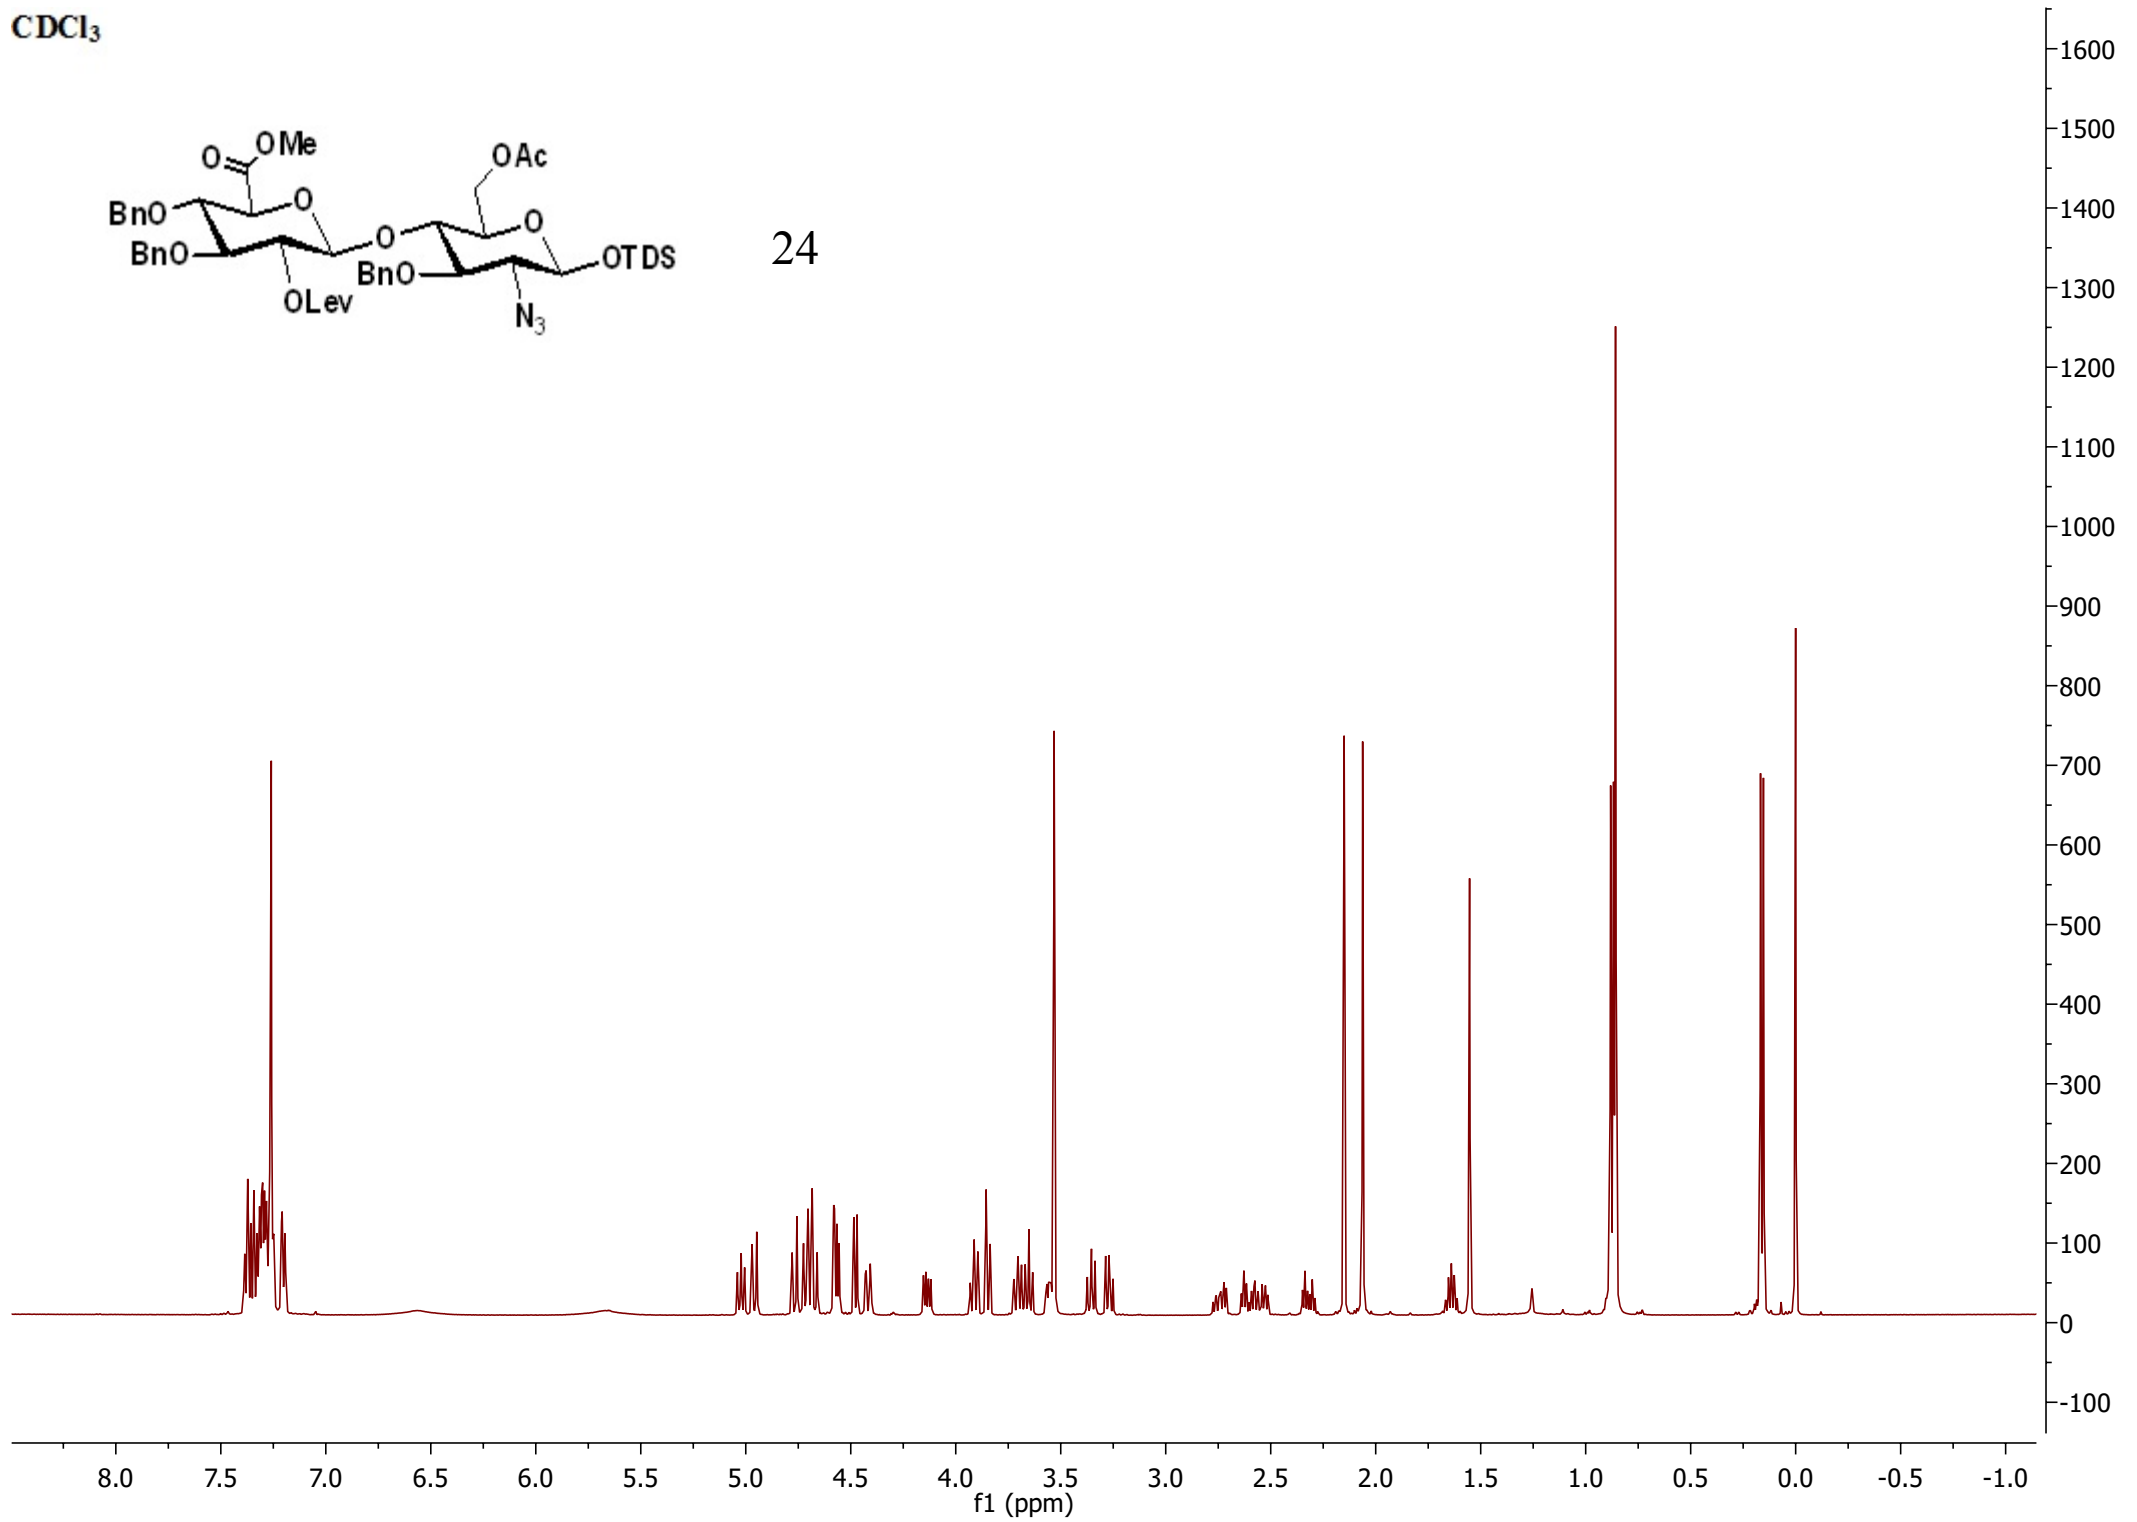

CDCl<sub>3</sub>

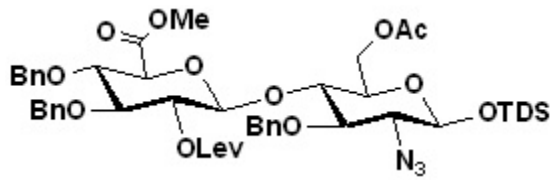

24

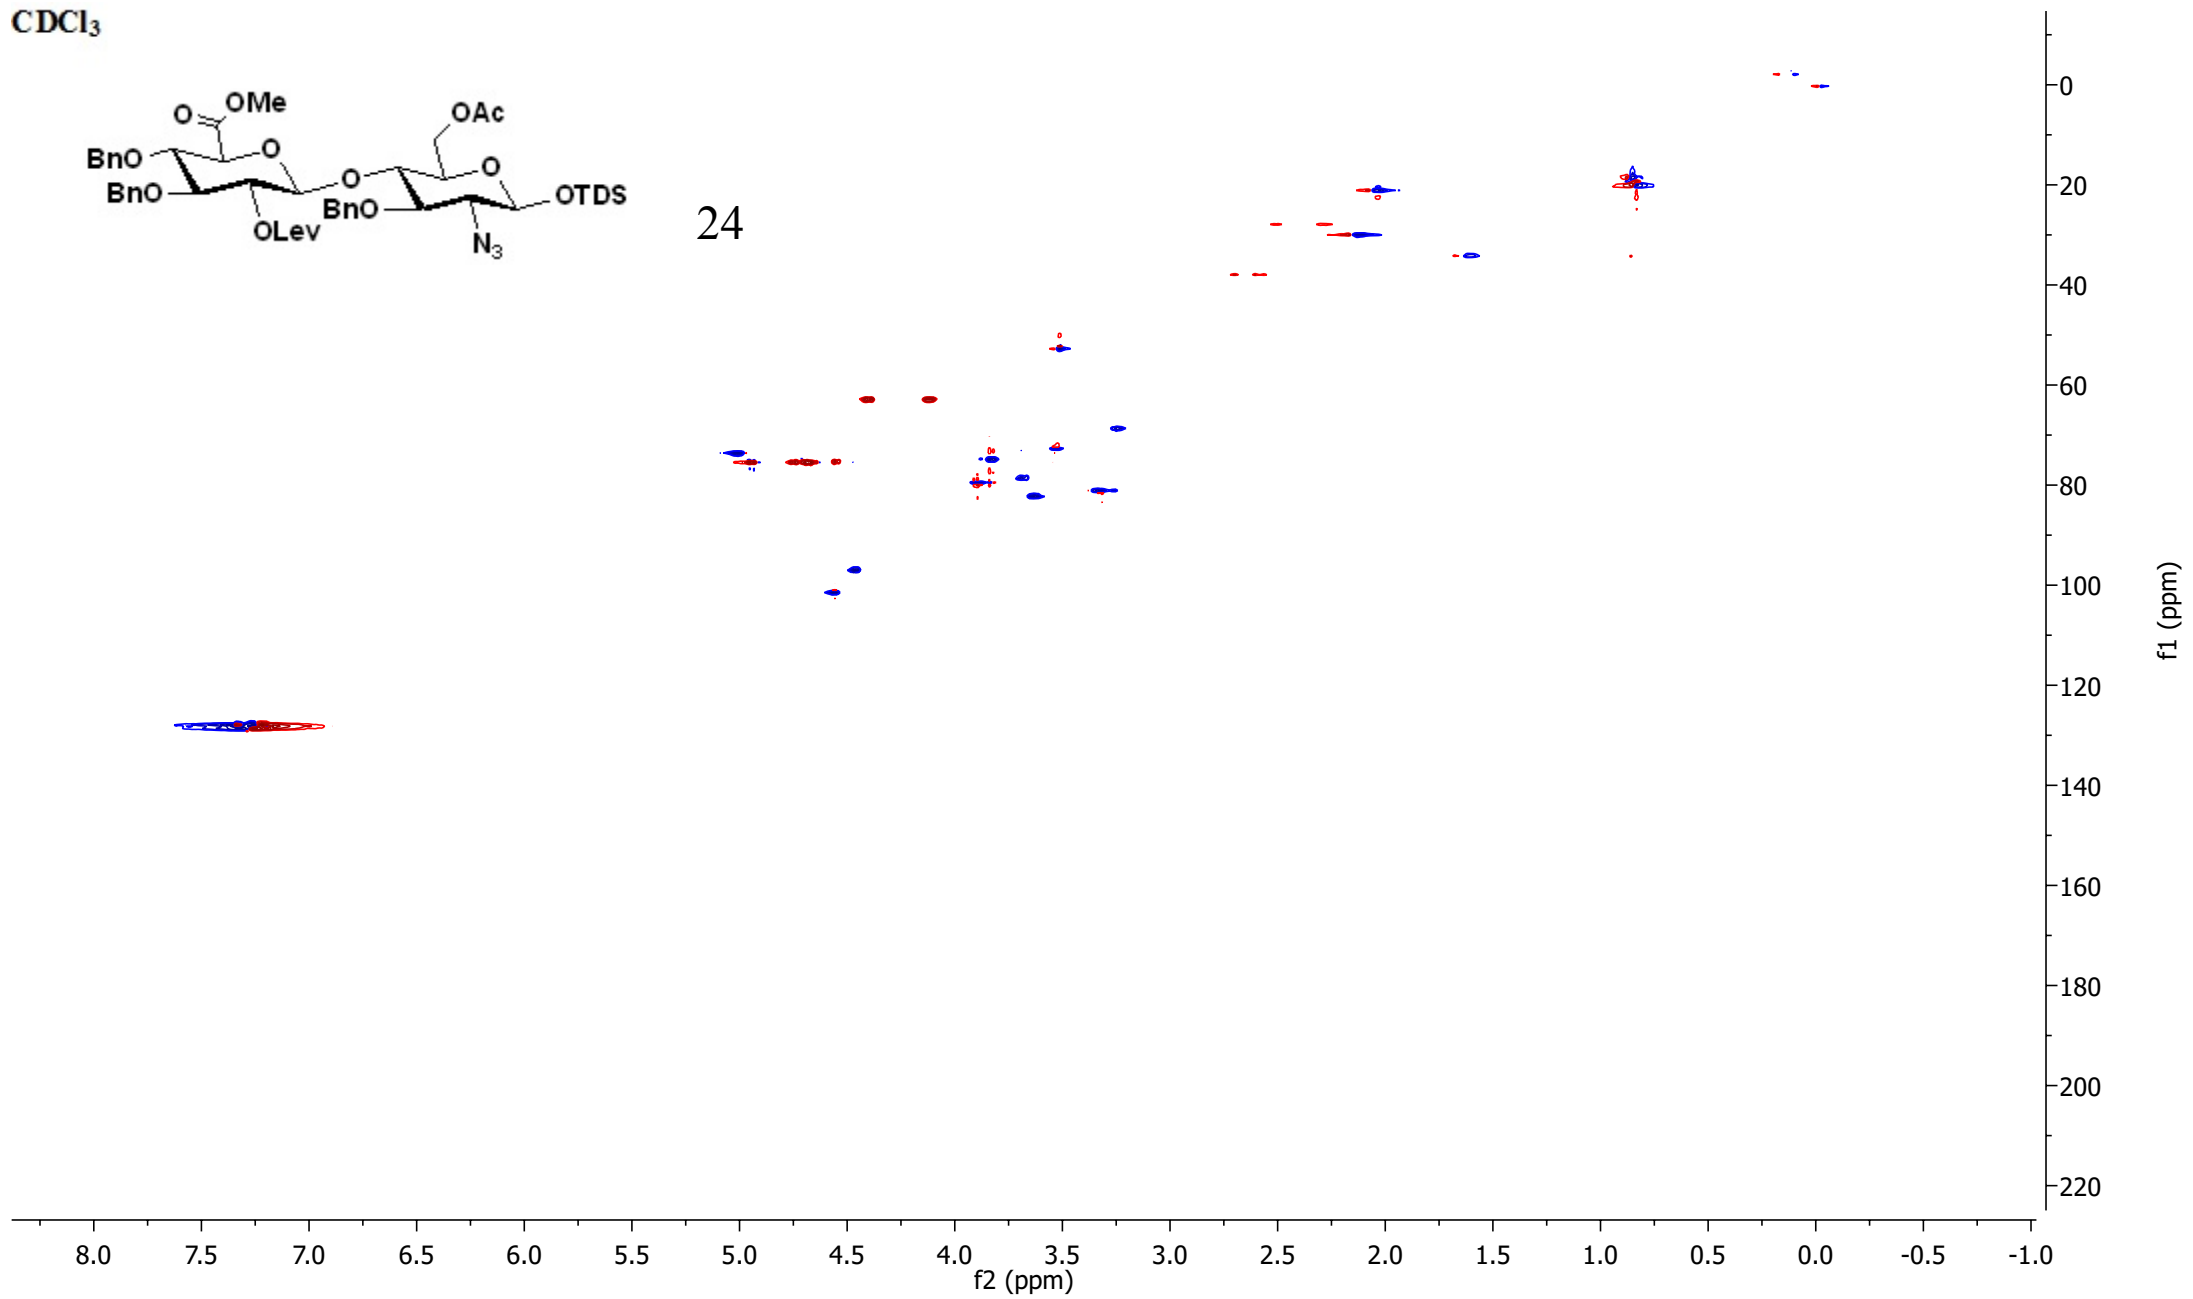

CDCl<sub>3</sub>

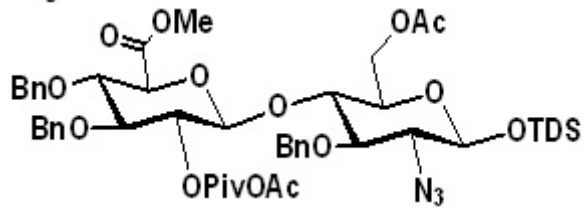

26

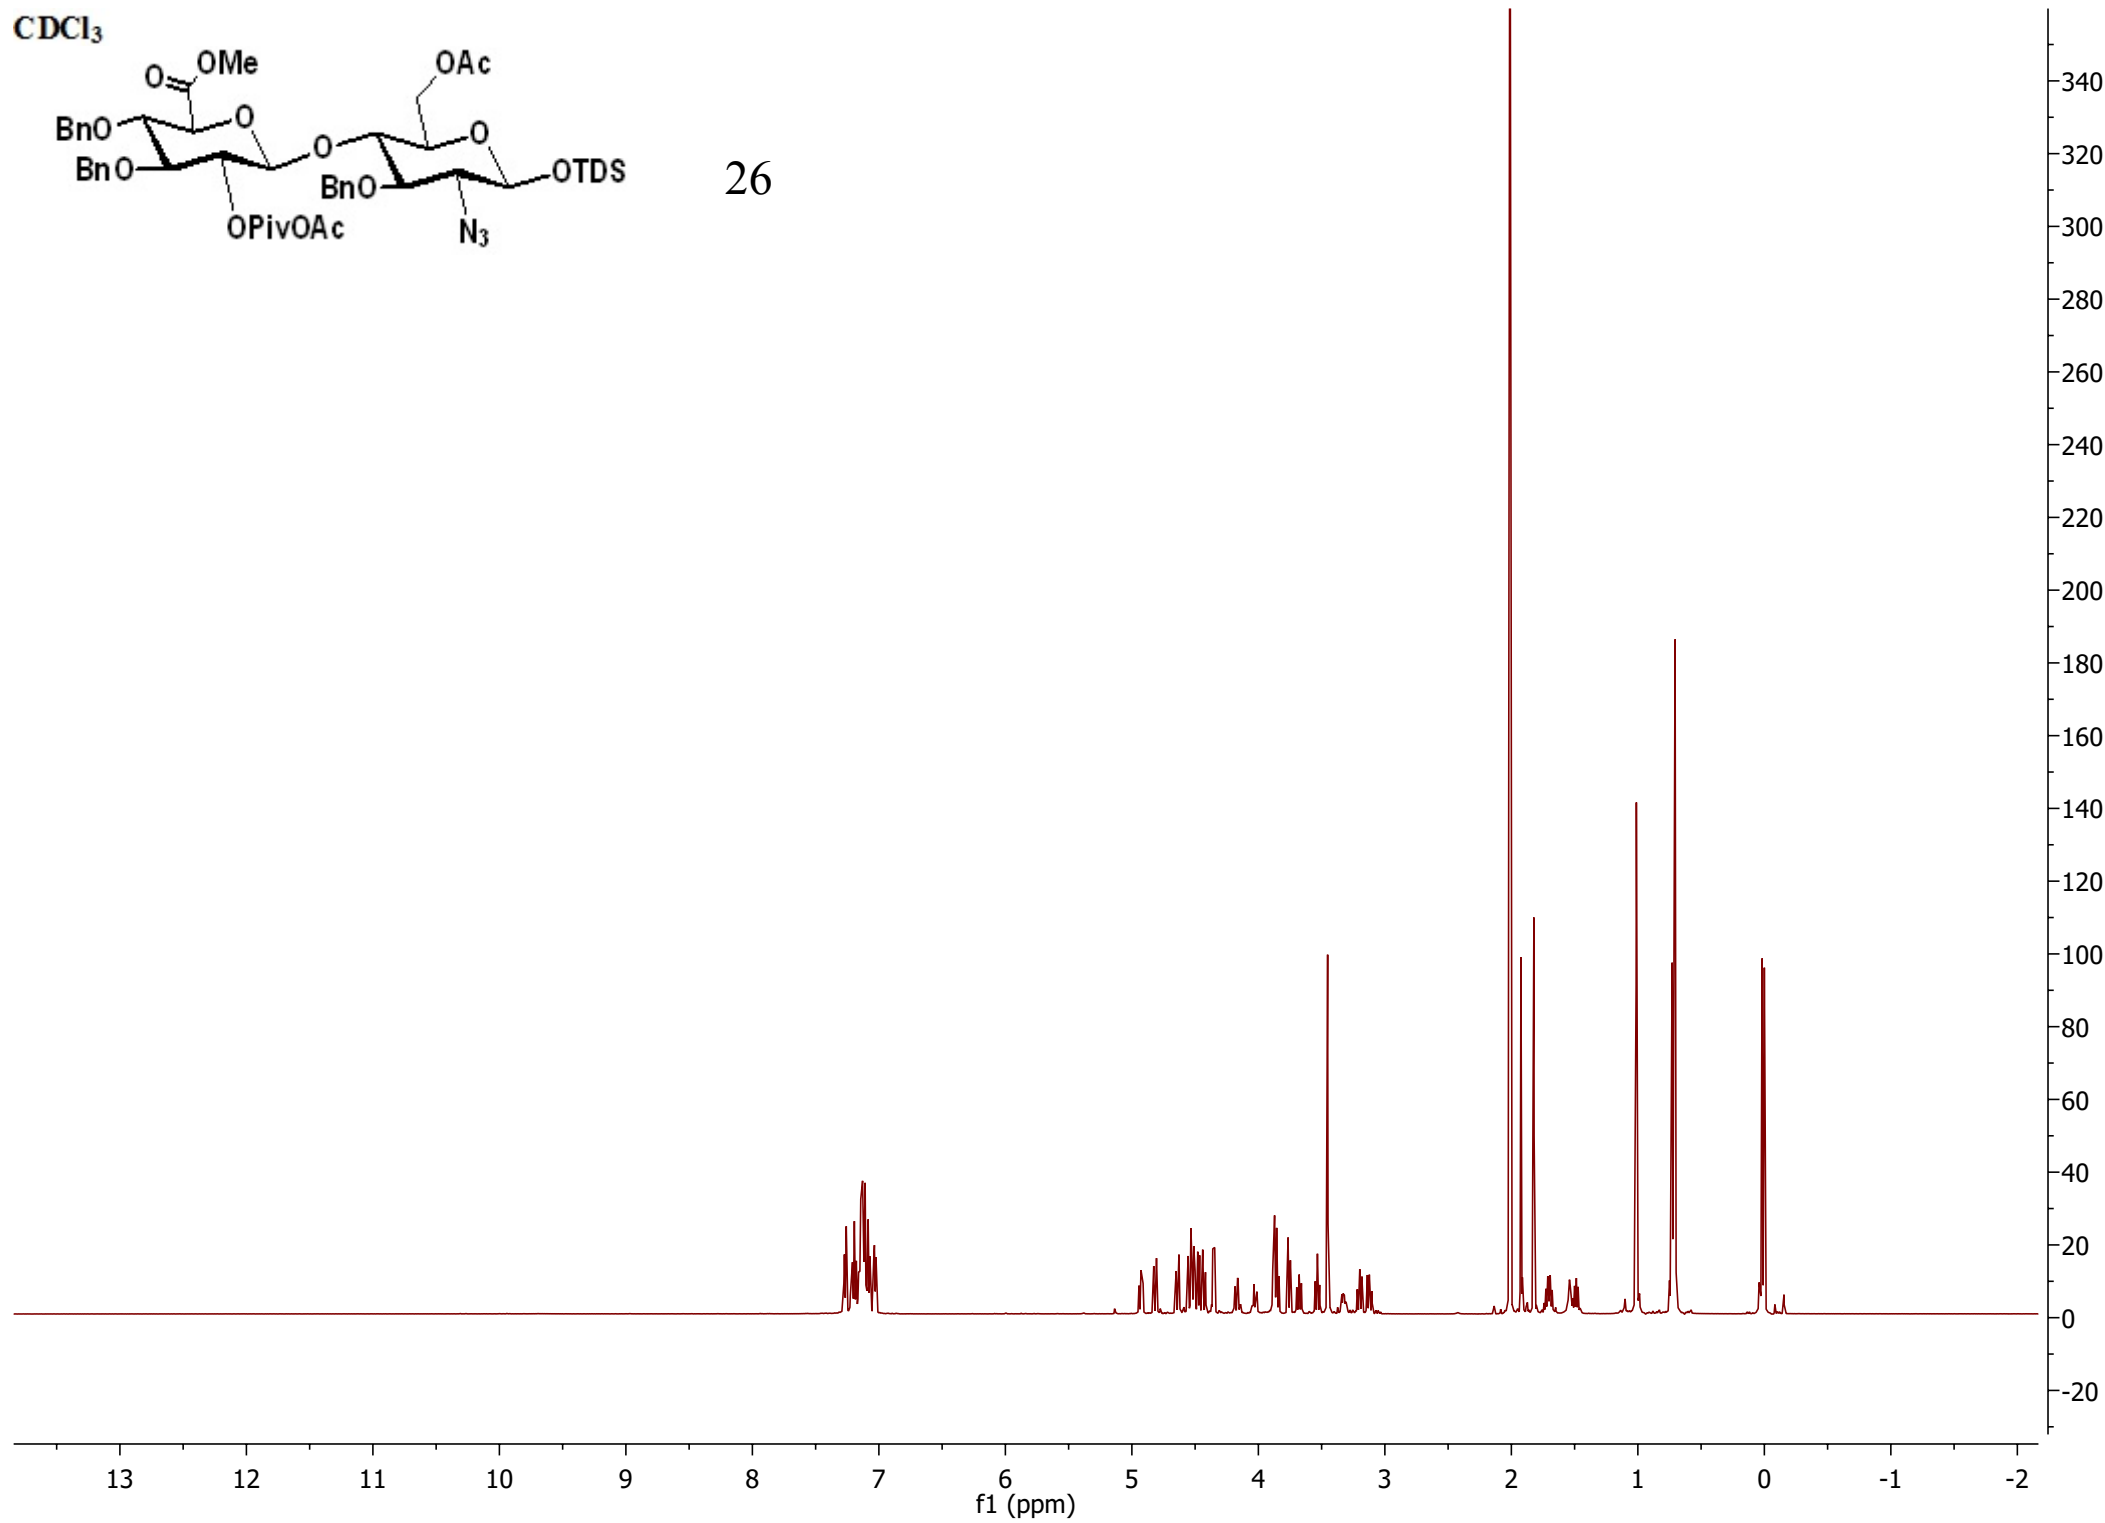

CDCl<sub>3</sub>

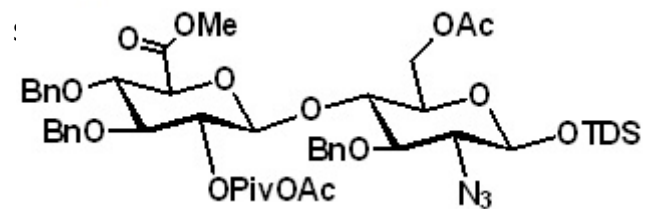

26

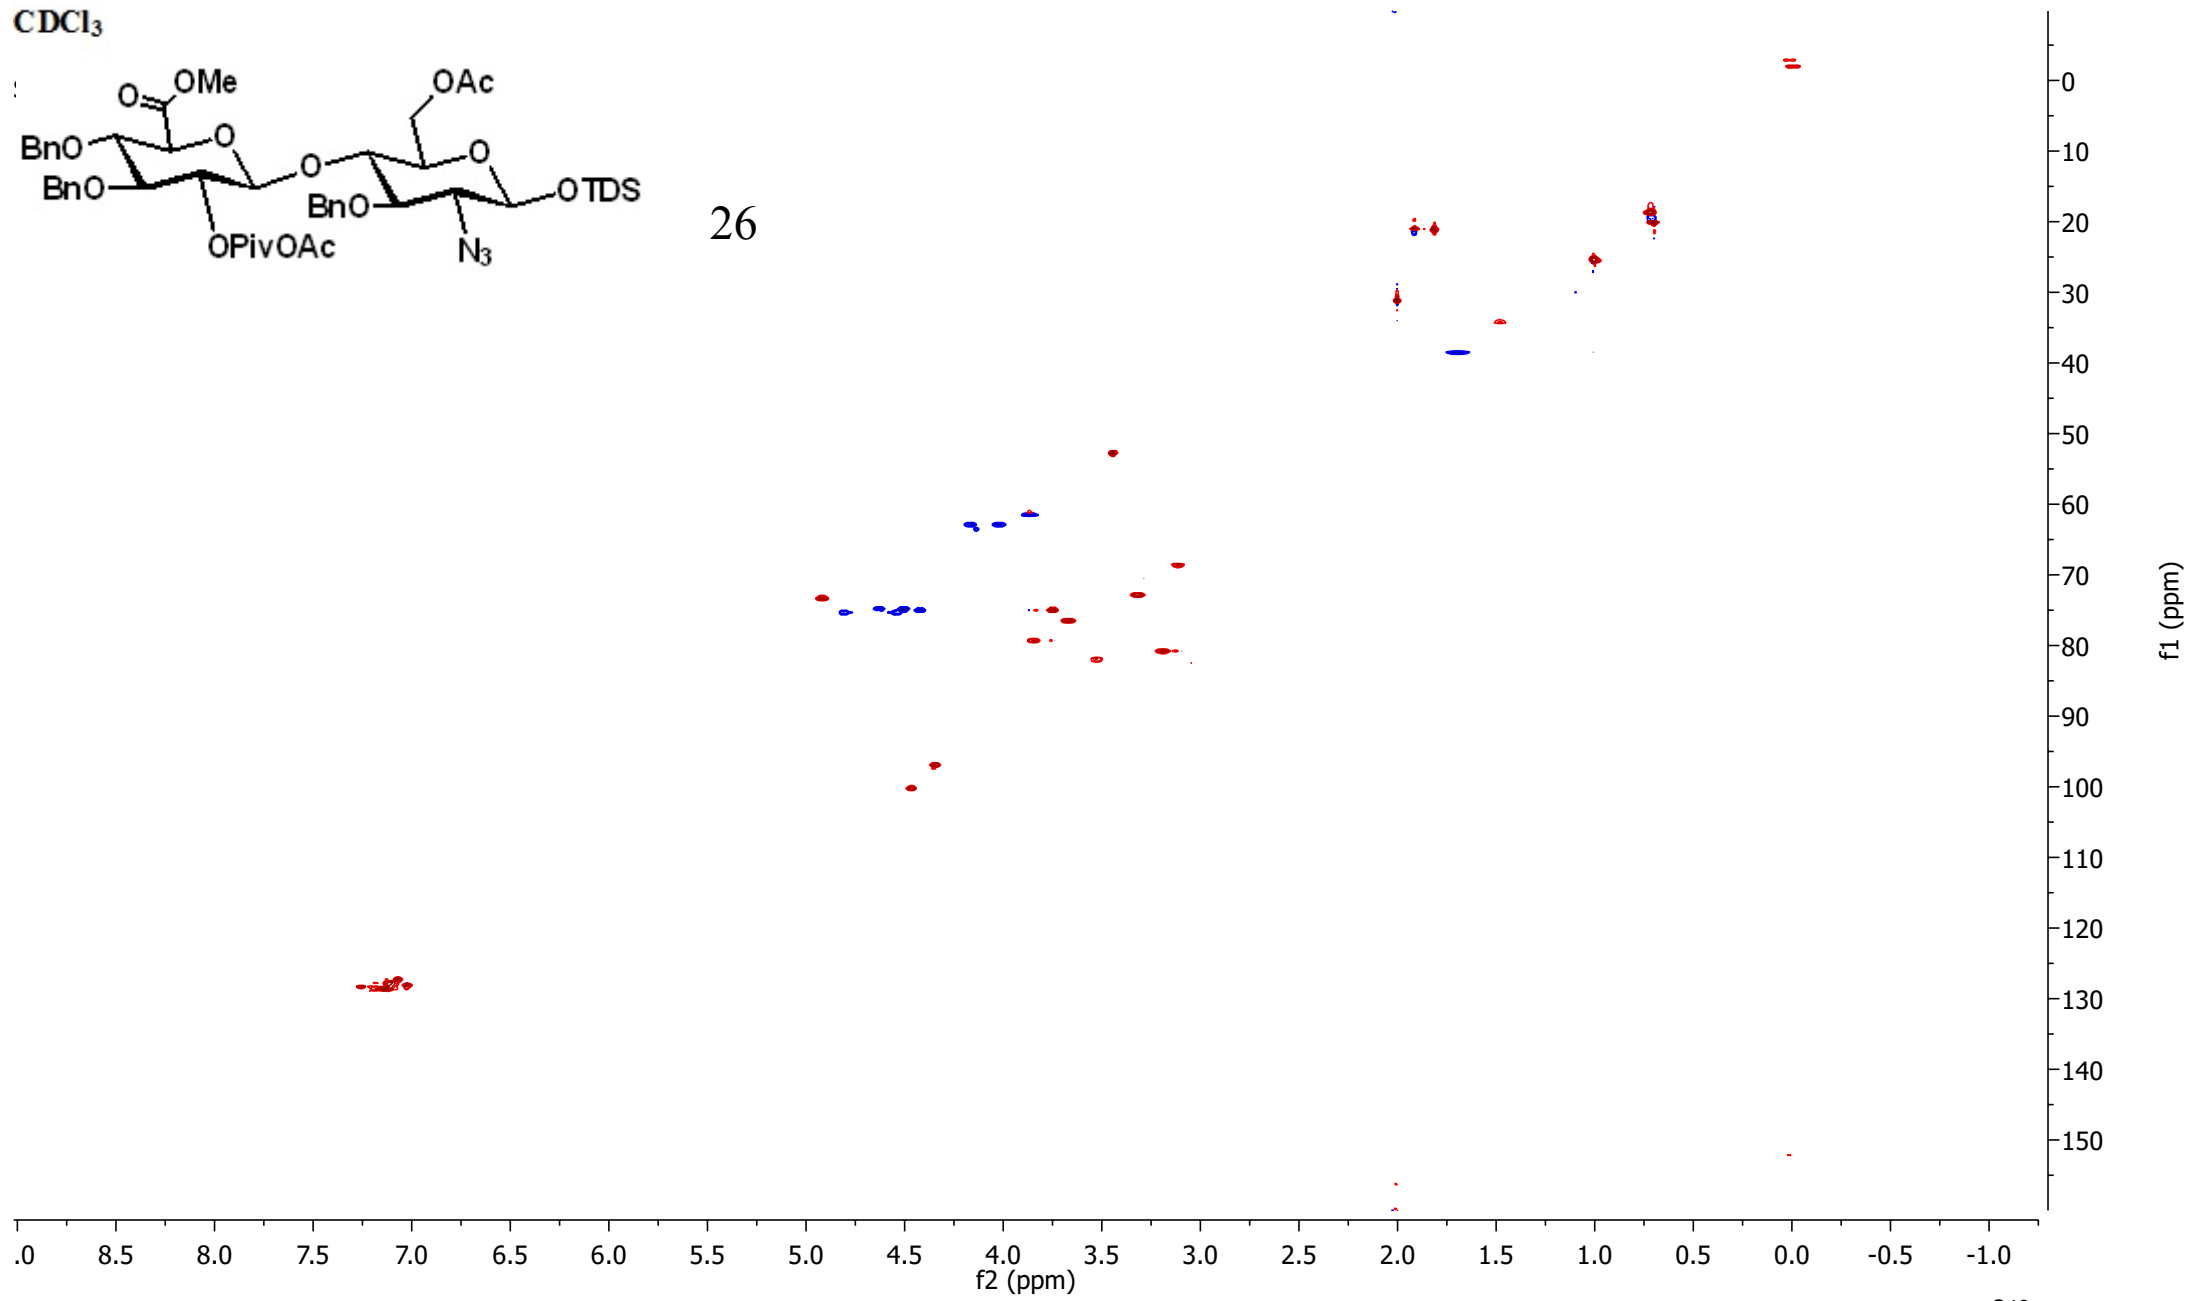



CDCl<sub>3</sub>

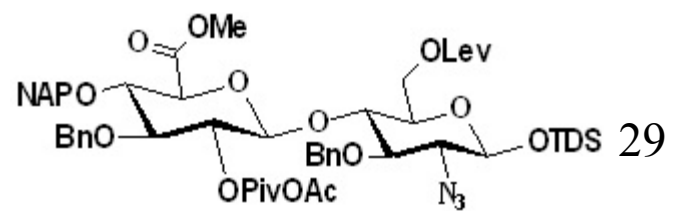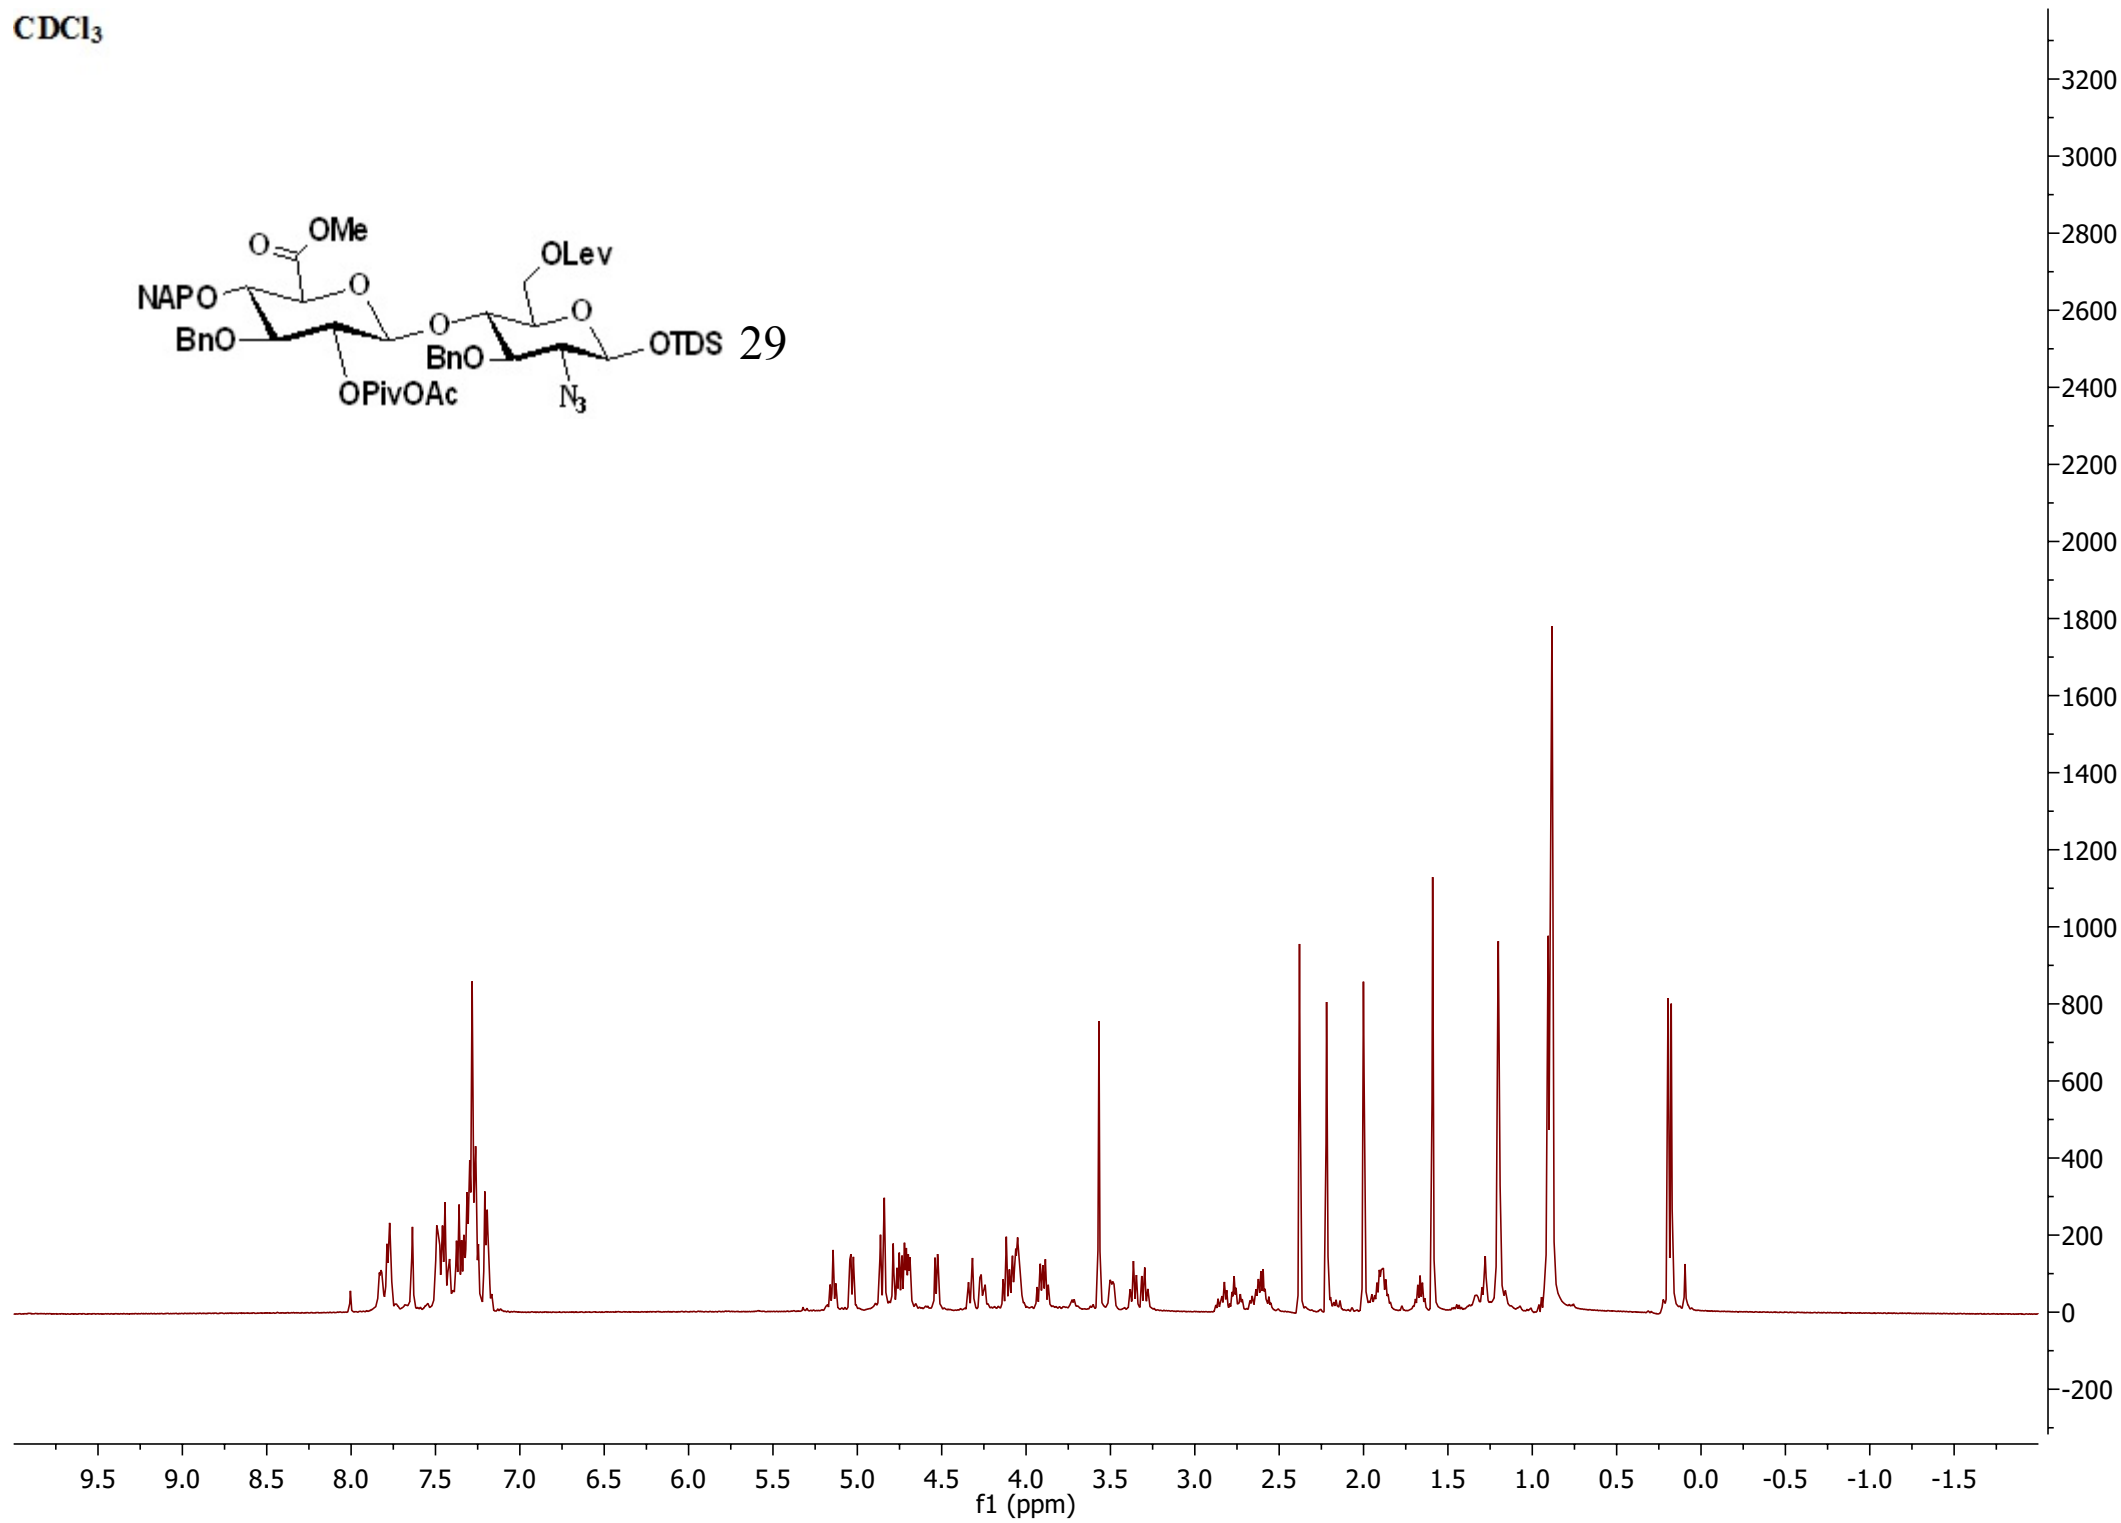

CDCl<sub>3</sub>

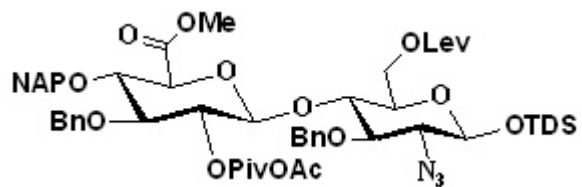

29

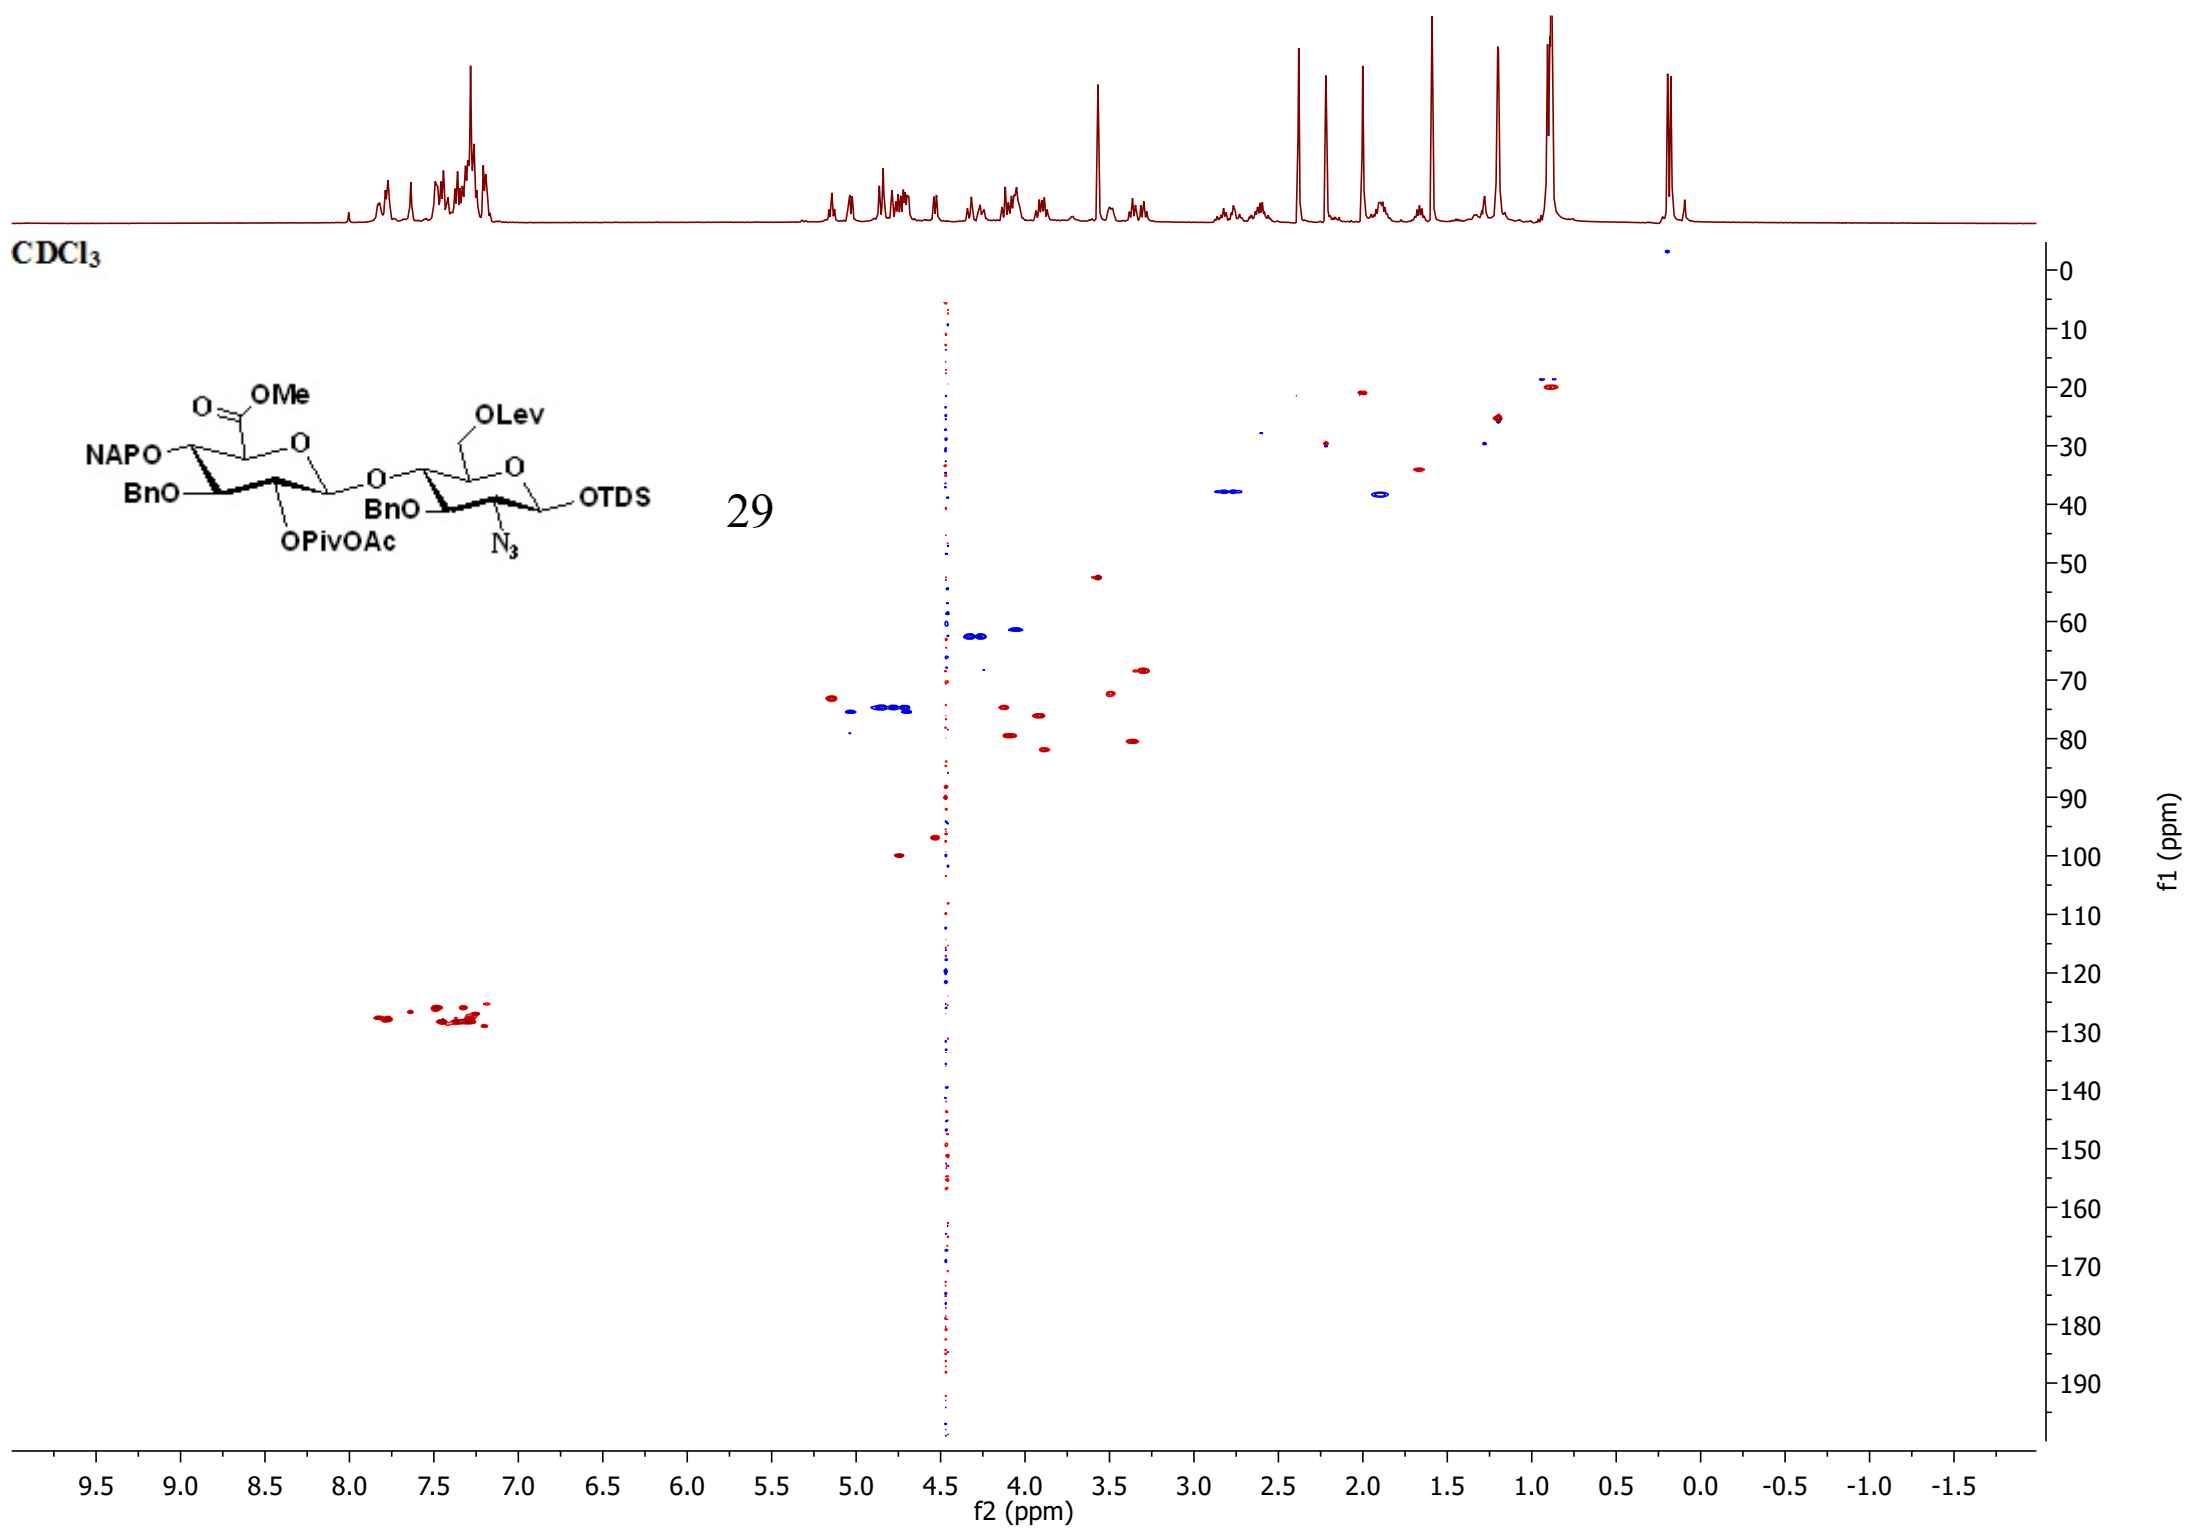

CDCl<sub>3</sub>

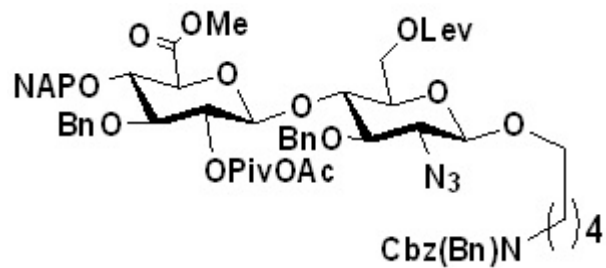

31

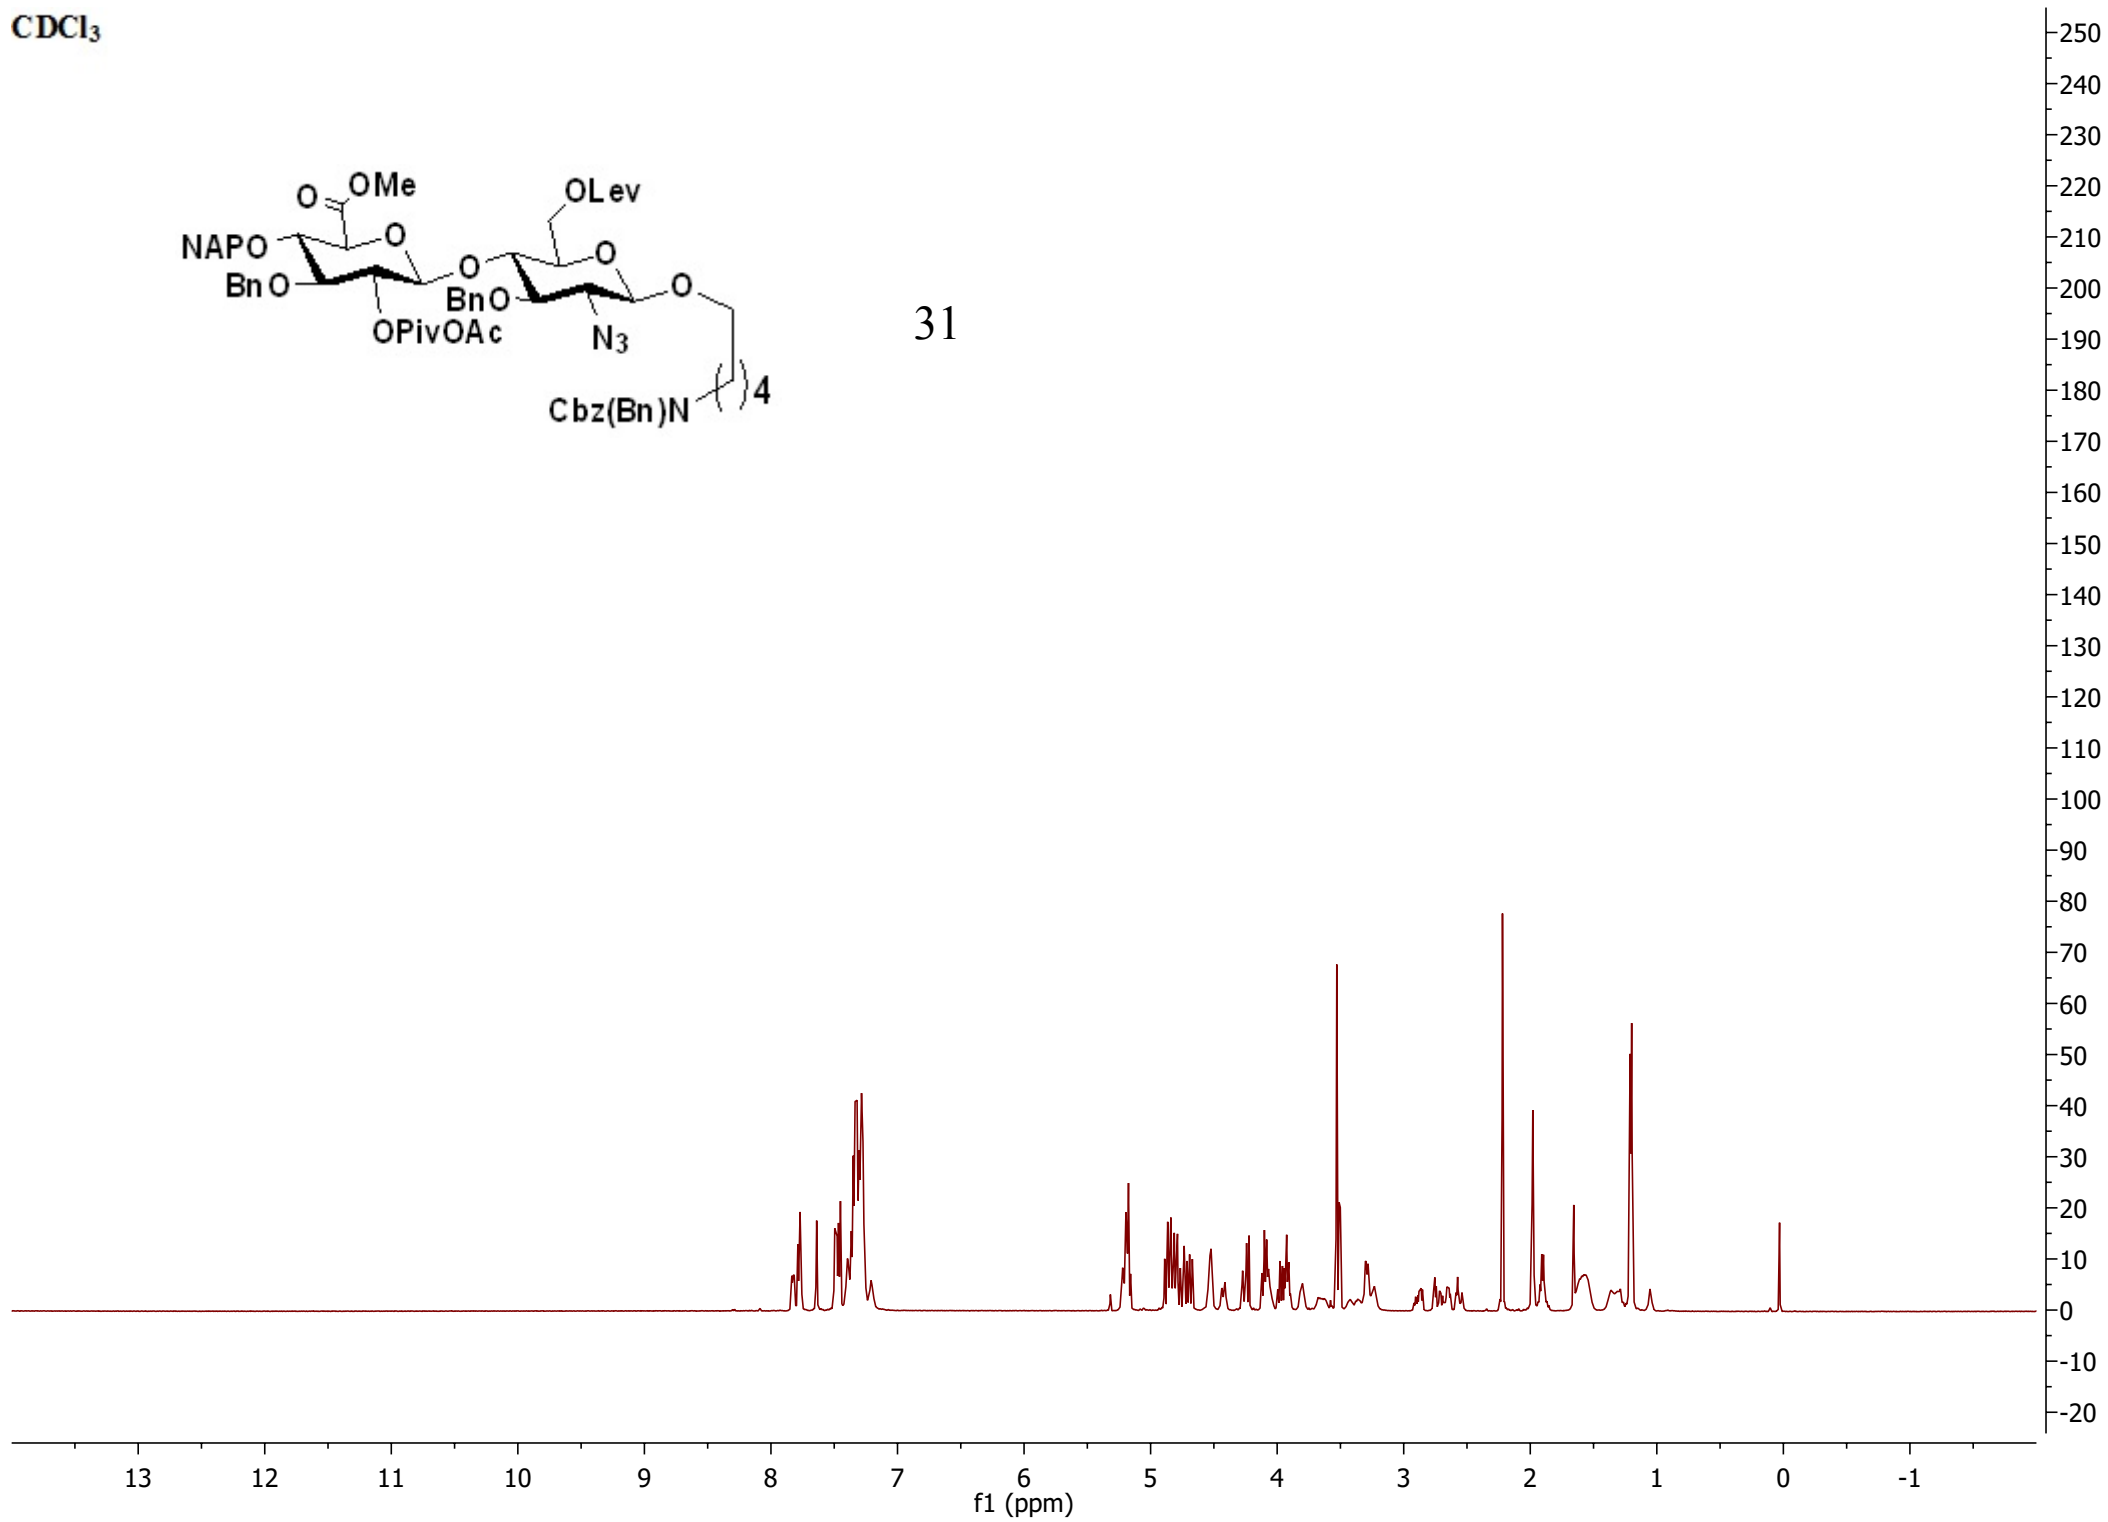

OD669\_gHSQC\_20130423\_01  
STANDARD 1H OBSERVE - profile

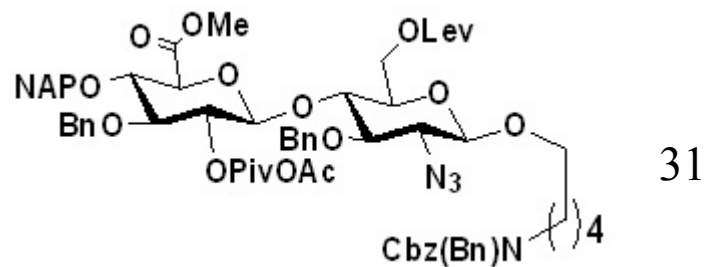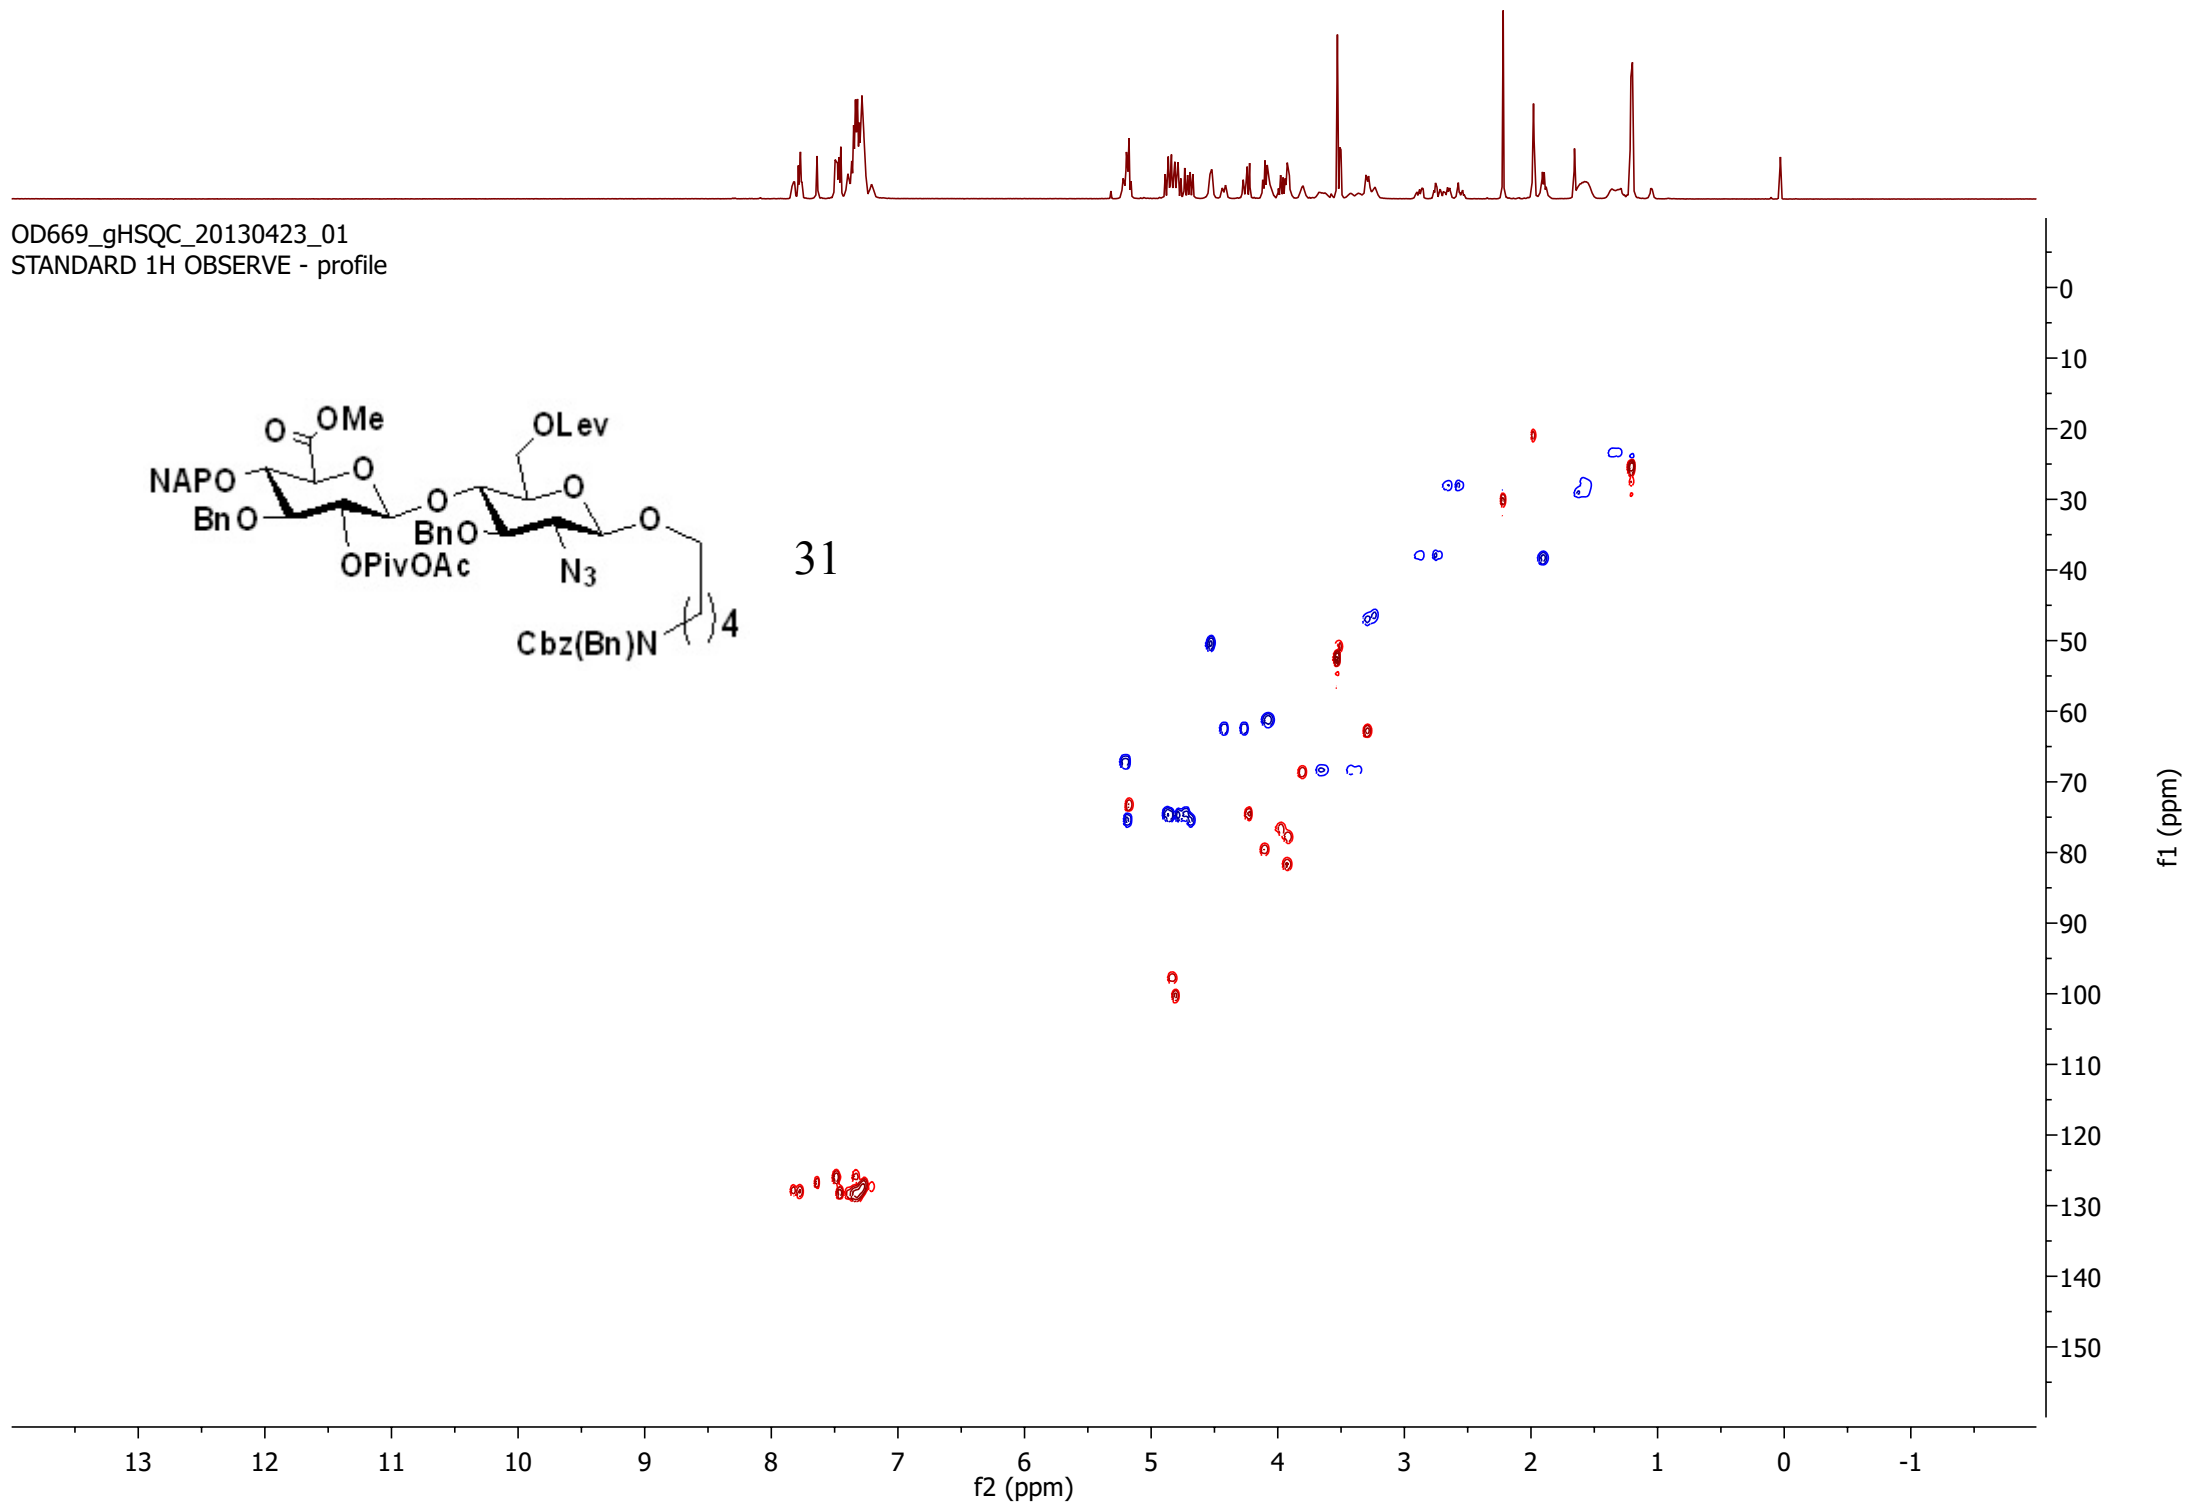

CDCl<sub>3</sub>

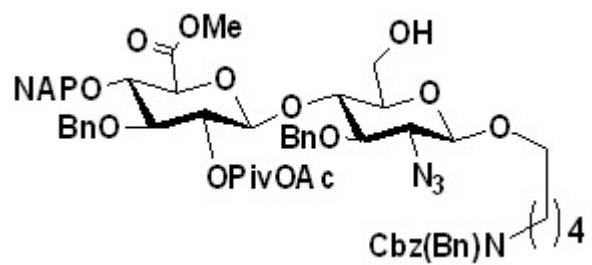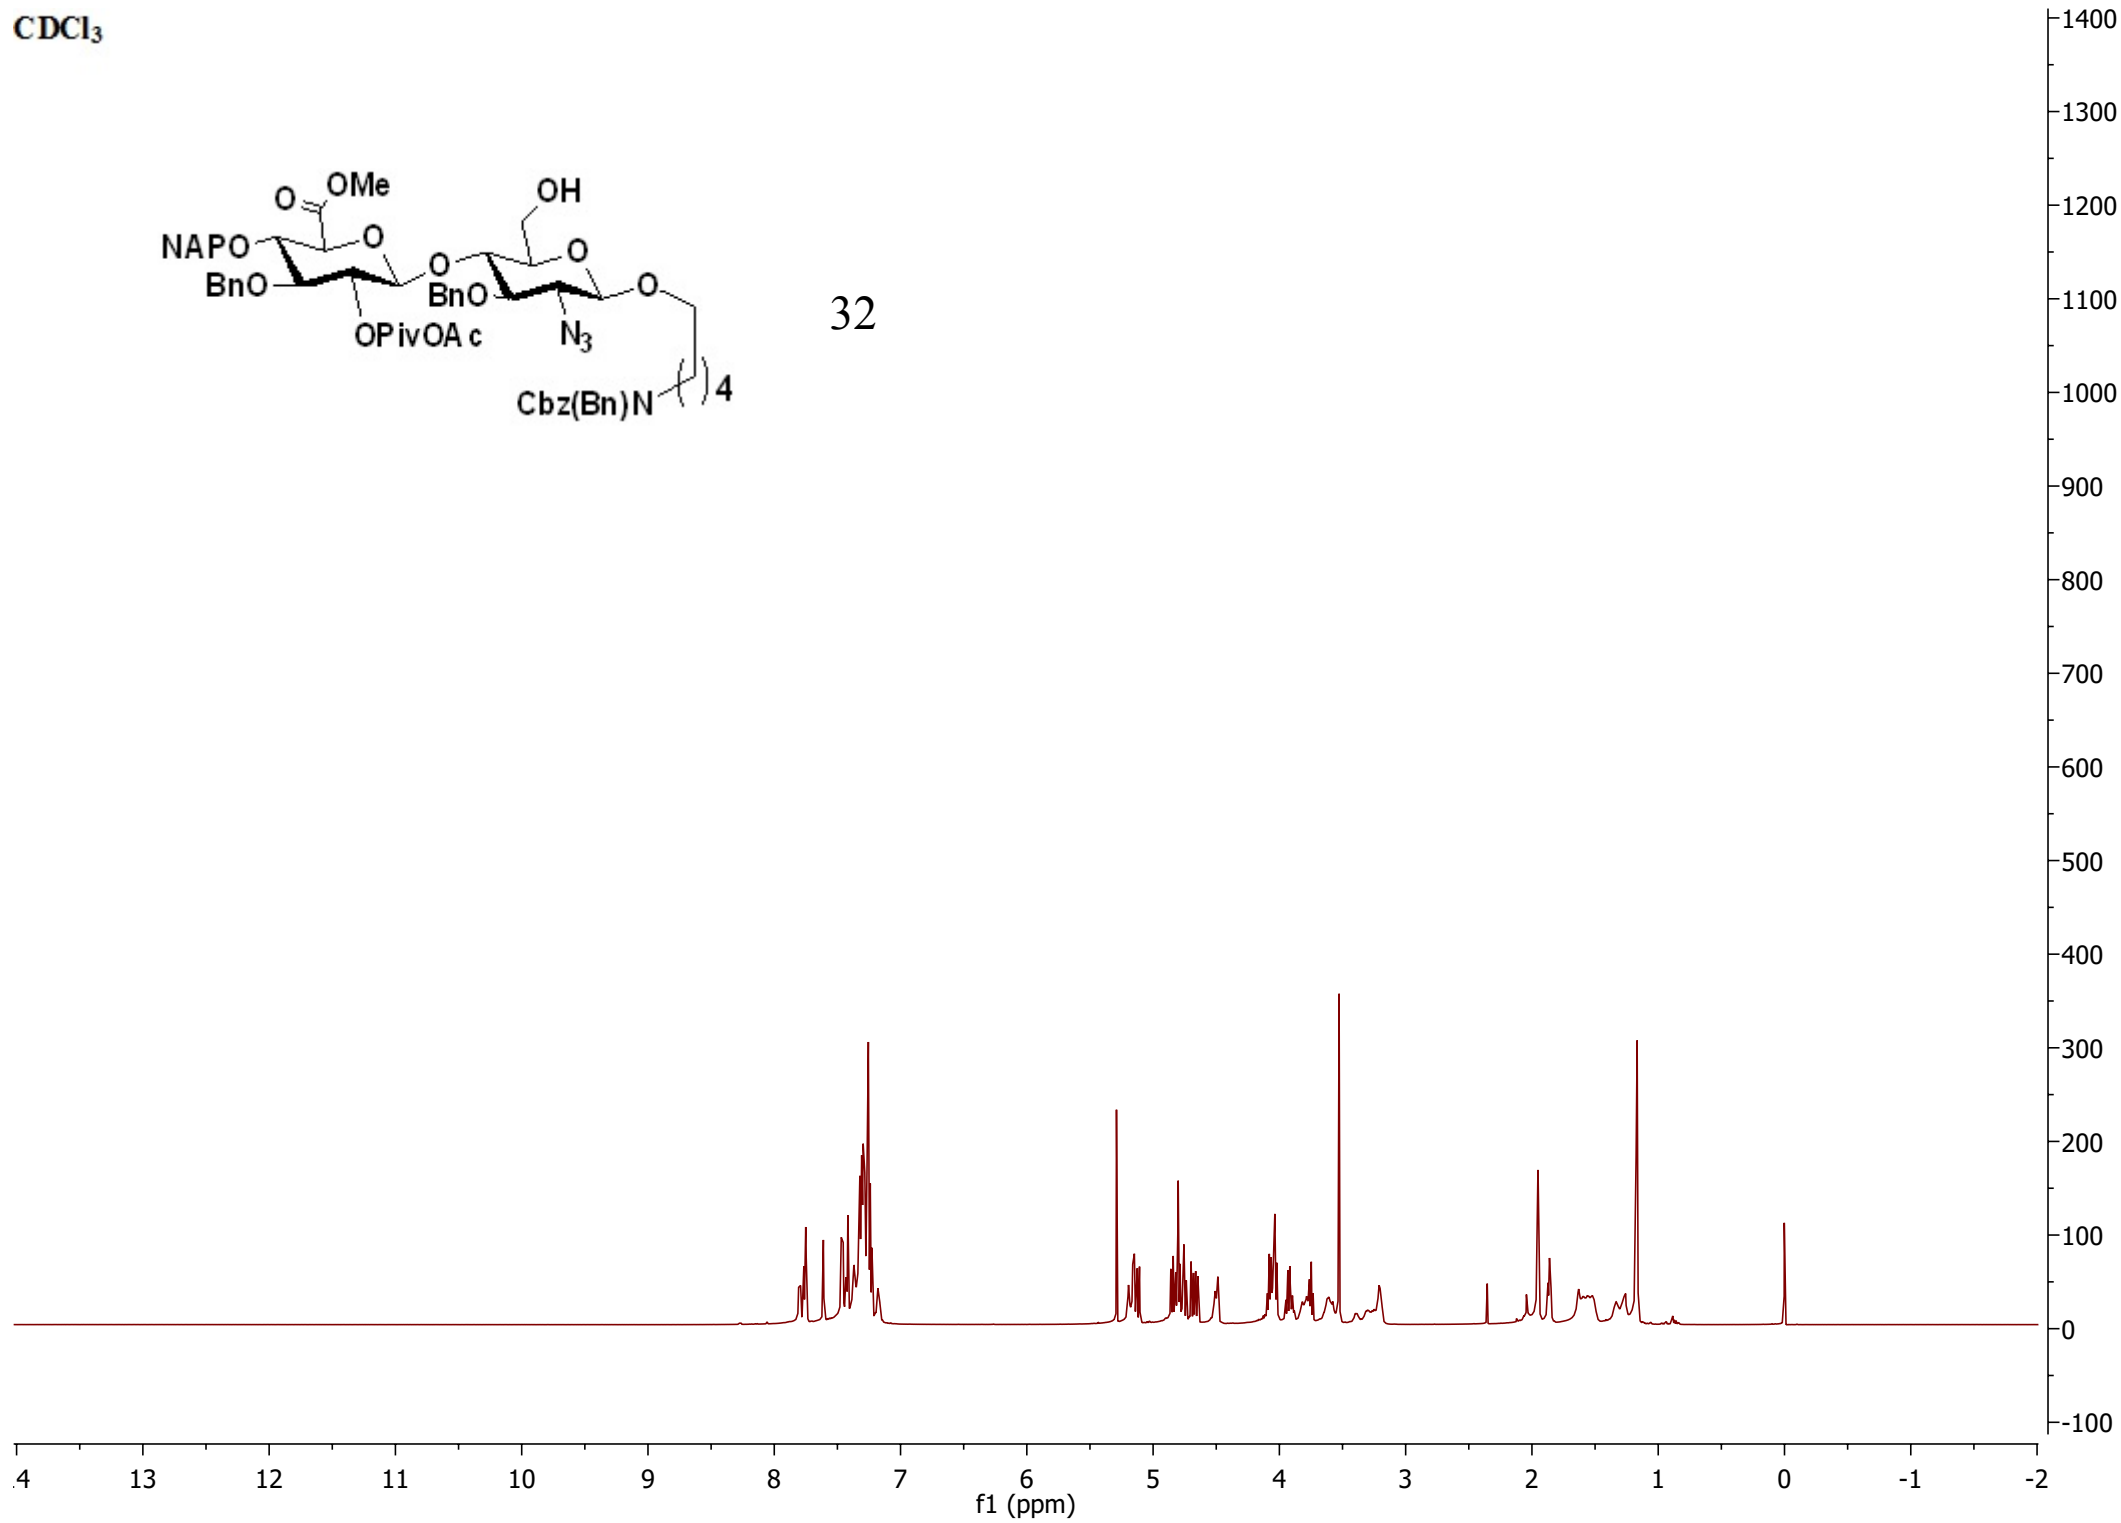

CDCl<sub>3</sub>

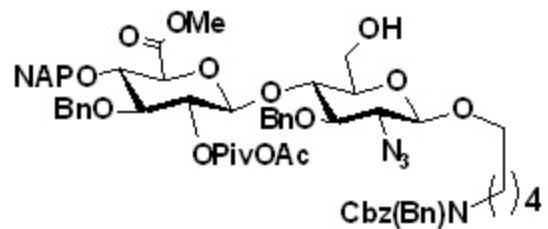

32

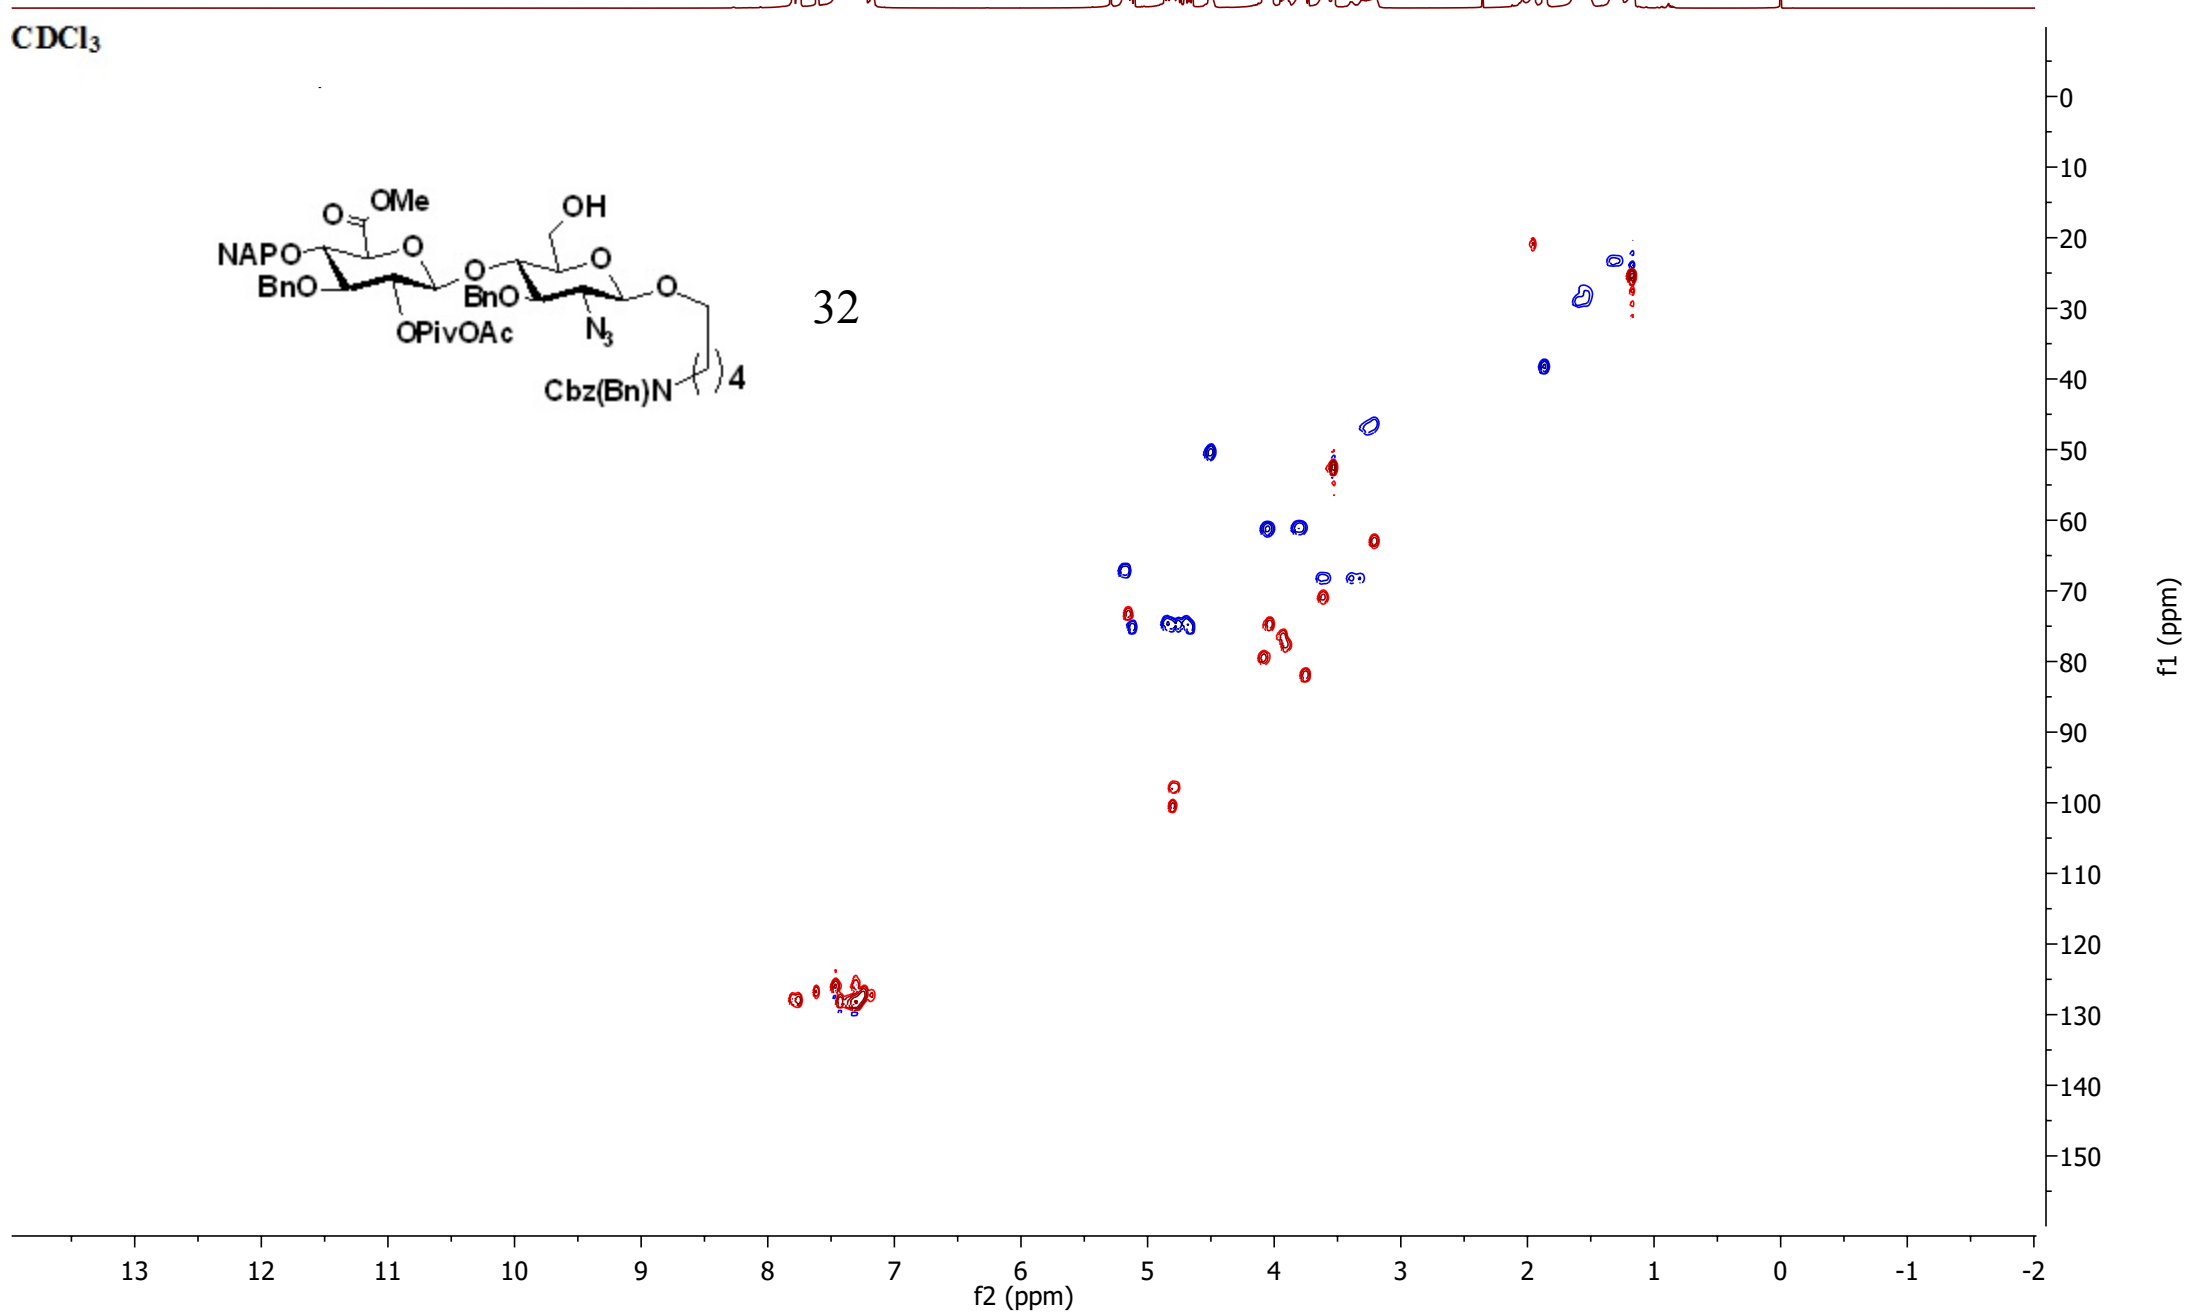

CD<sub>3</sub>OD

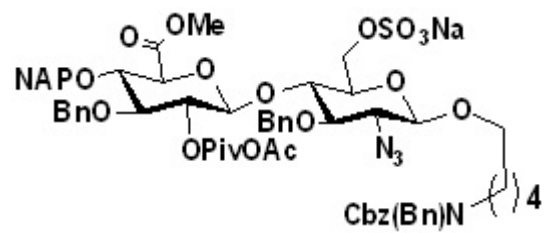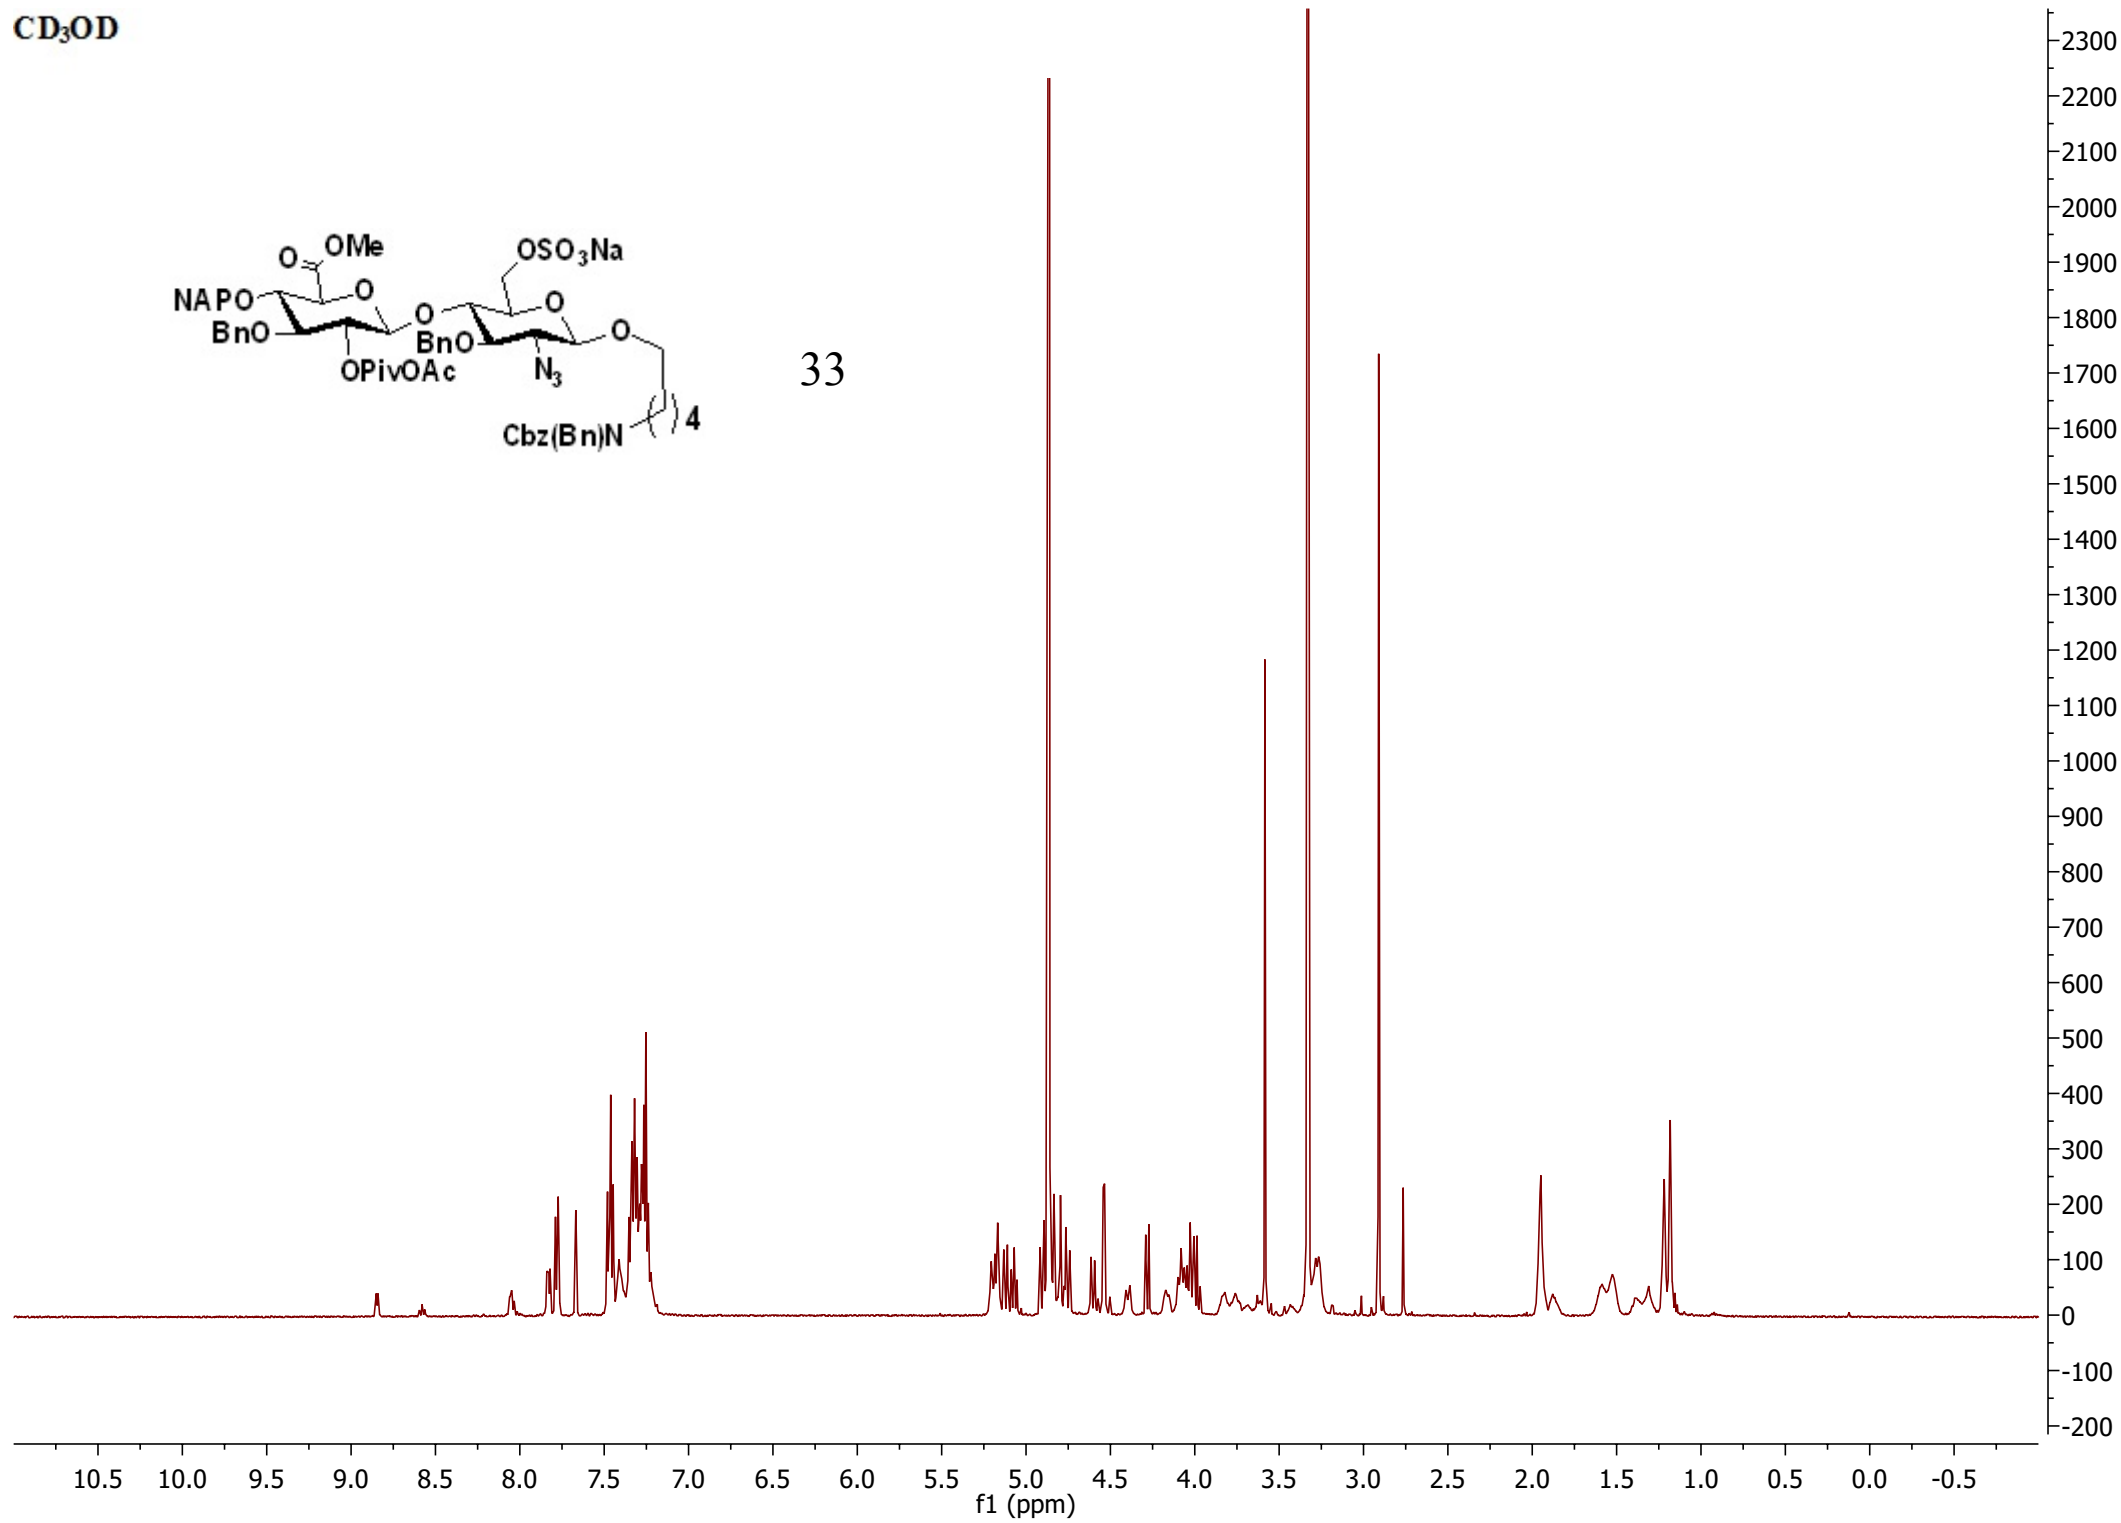

CD<sub>3</sub>OD

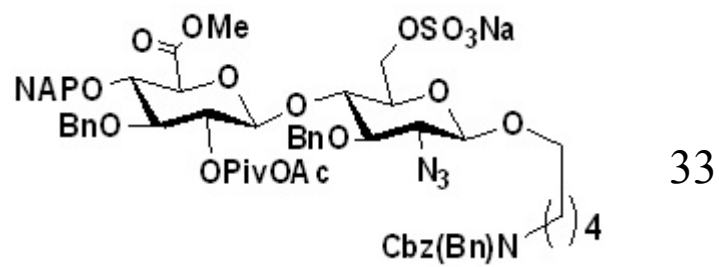

33

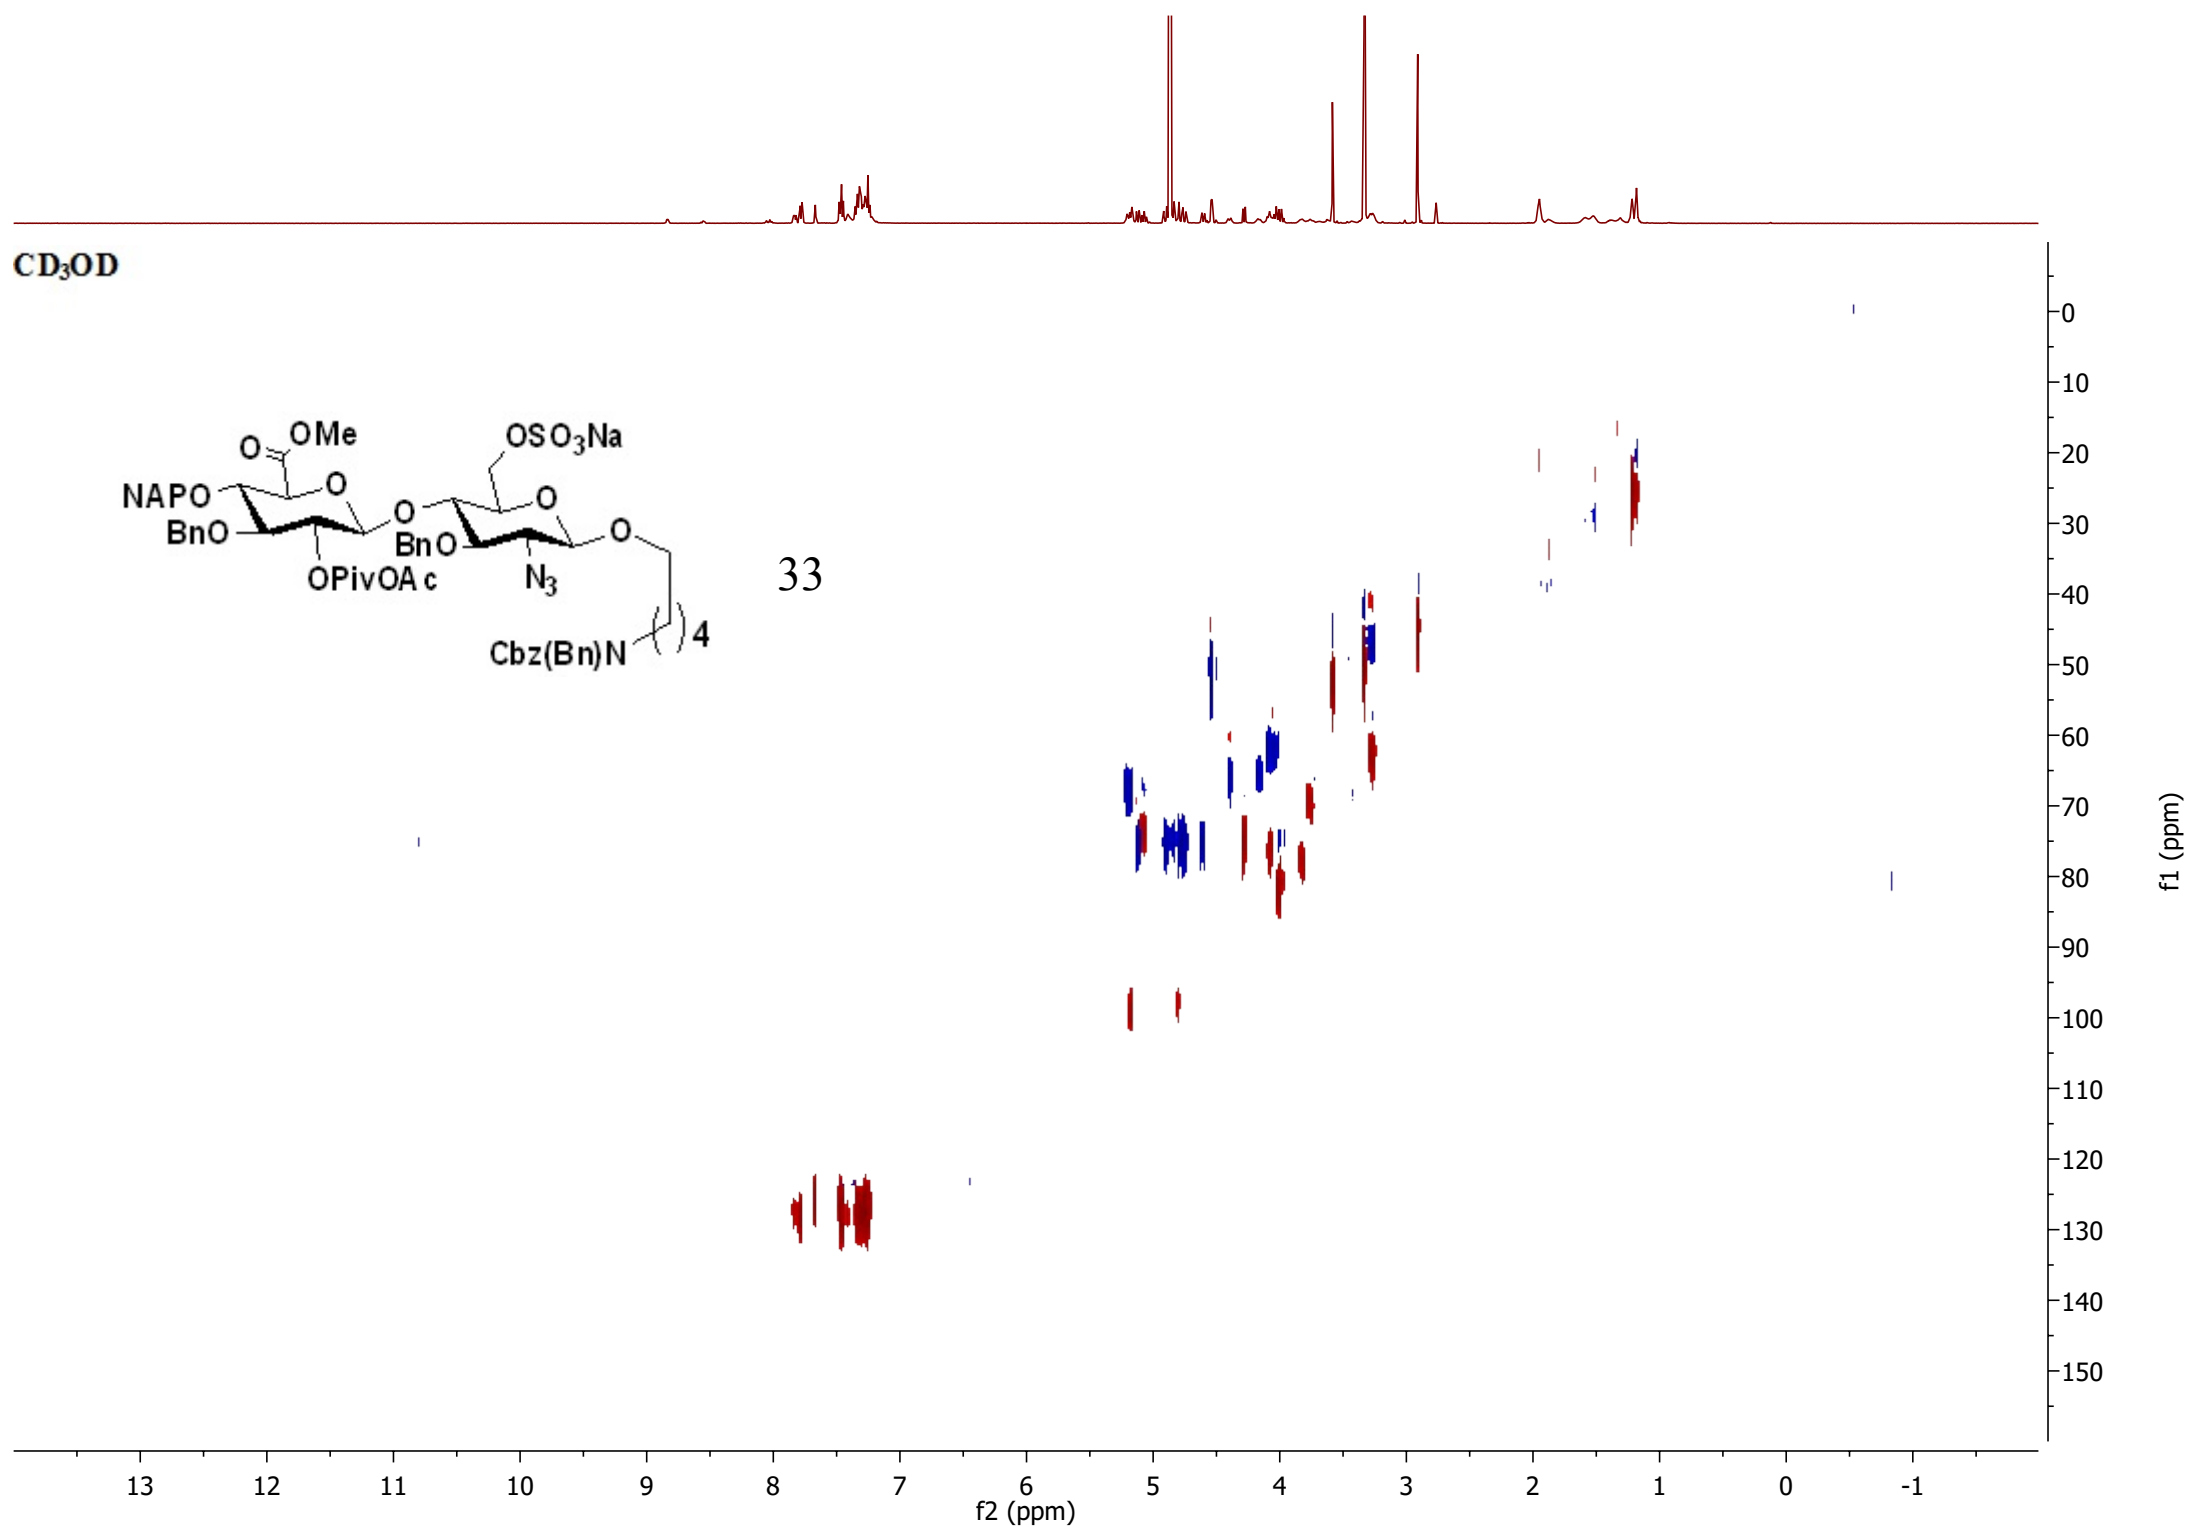



CD<sub>3</sub>OD

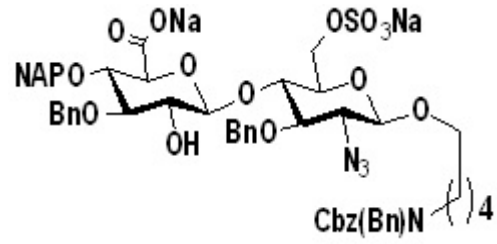

34

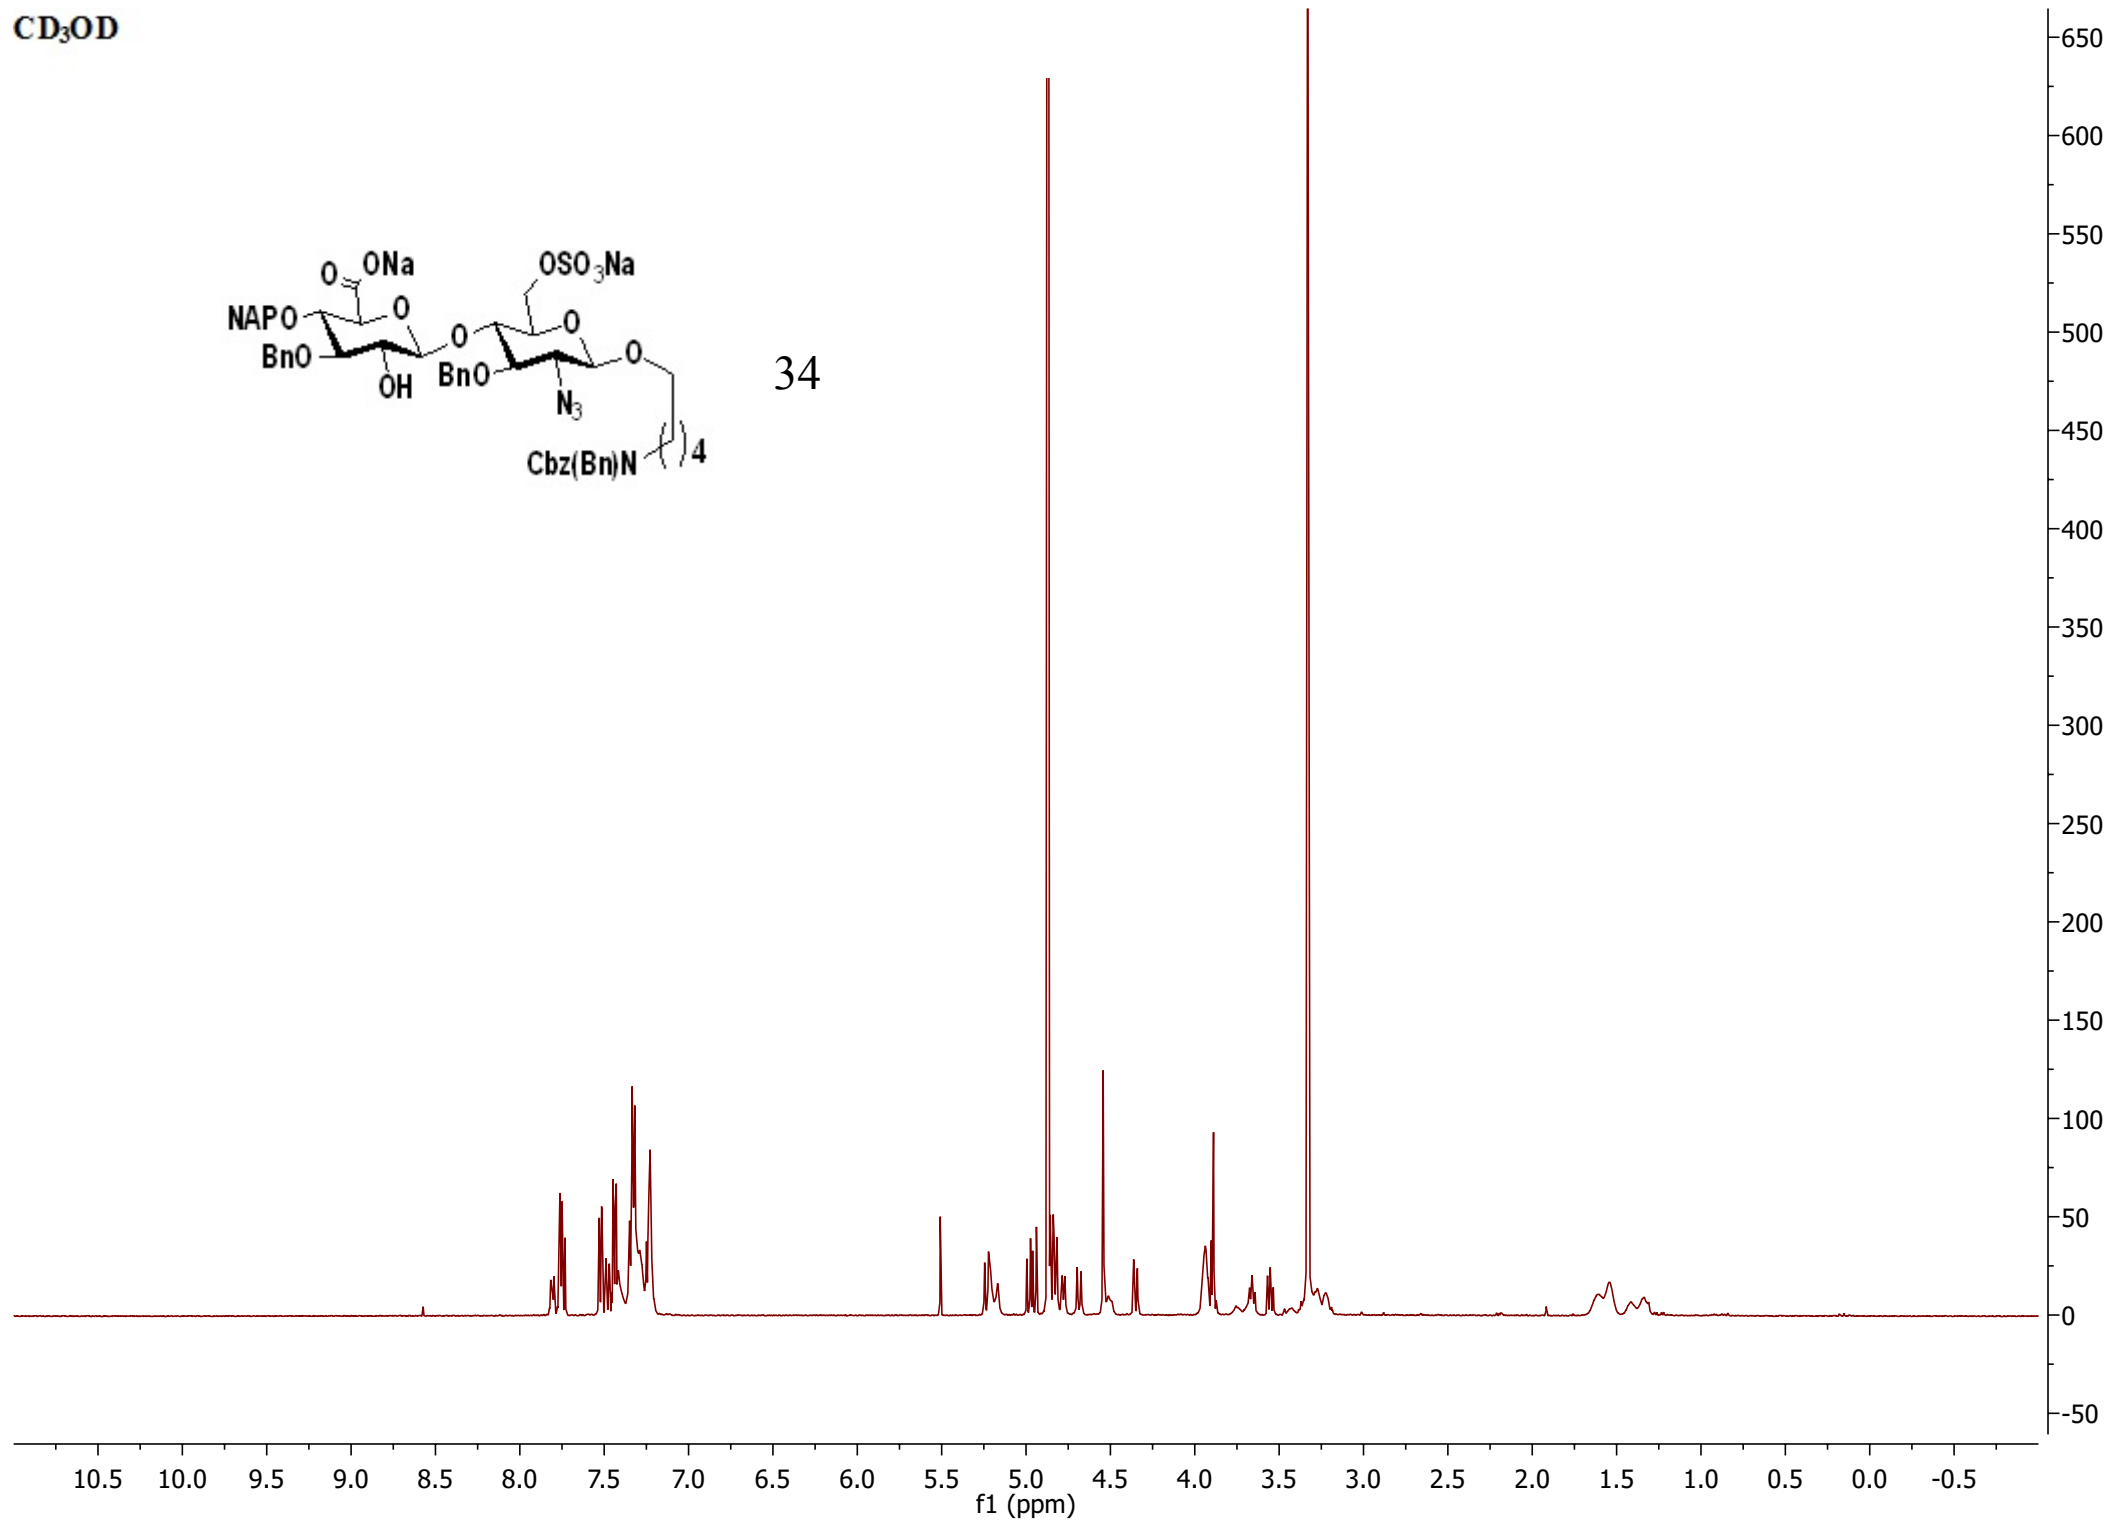

CD<sub>3</sub>OD

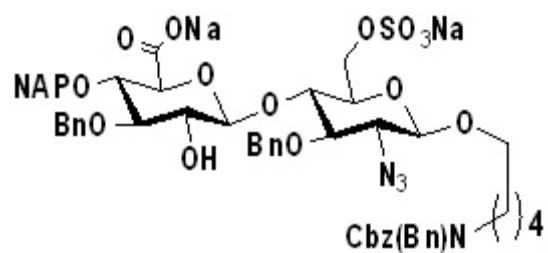

10.5 10.0 9.5 9.0 8.5 8.0 7.5 7.0 6.5 6.0 5.5 5.0 4.5 4.0 3.5 3.0 2.5 2.0 1.5 1.0 0.5 0.0 -0.5

f2 (ppm)

f1 (ppm)

CD<sub>3</sub>OD

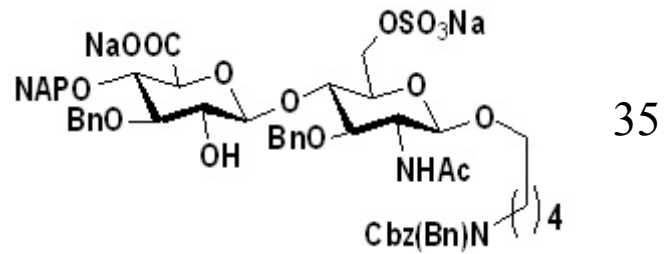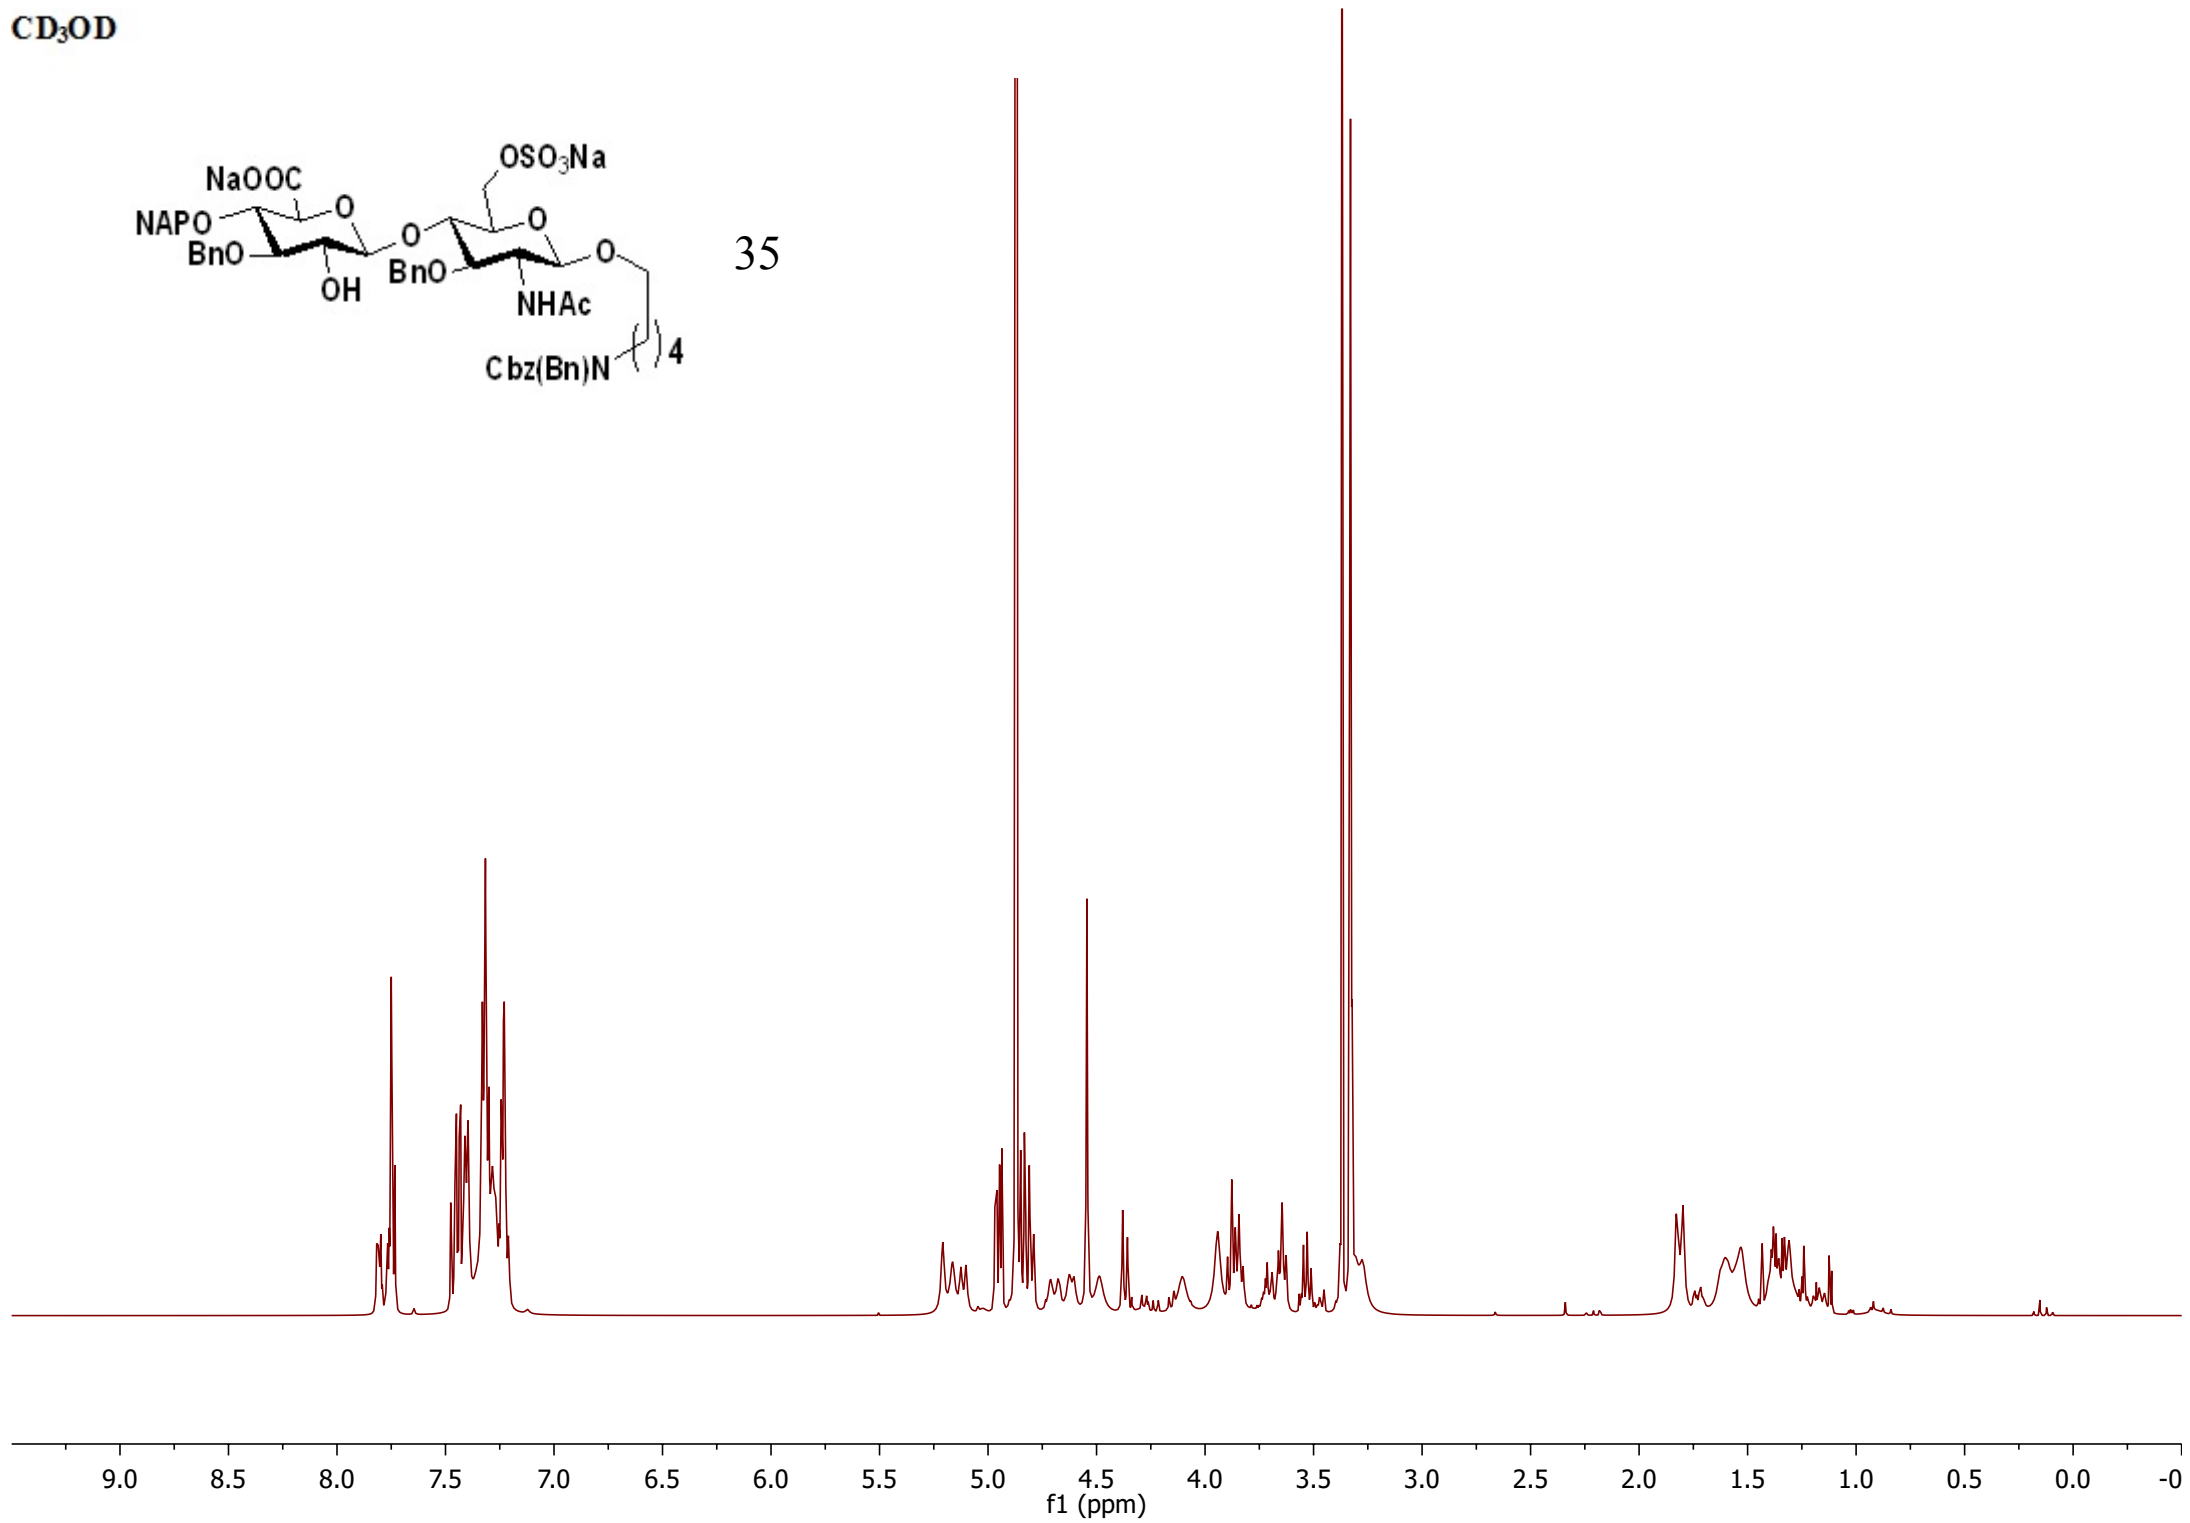

CD<sub>3</sub>OD

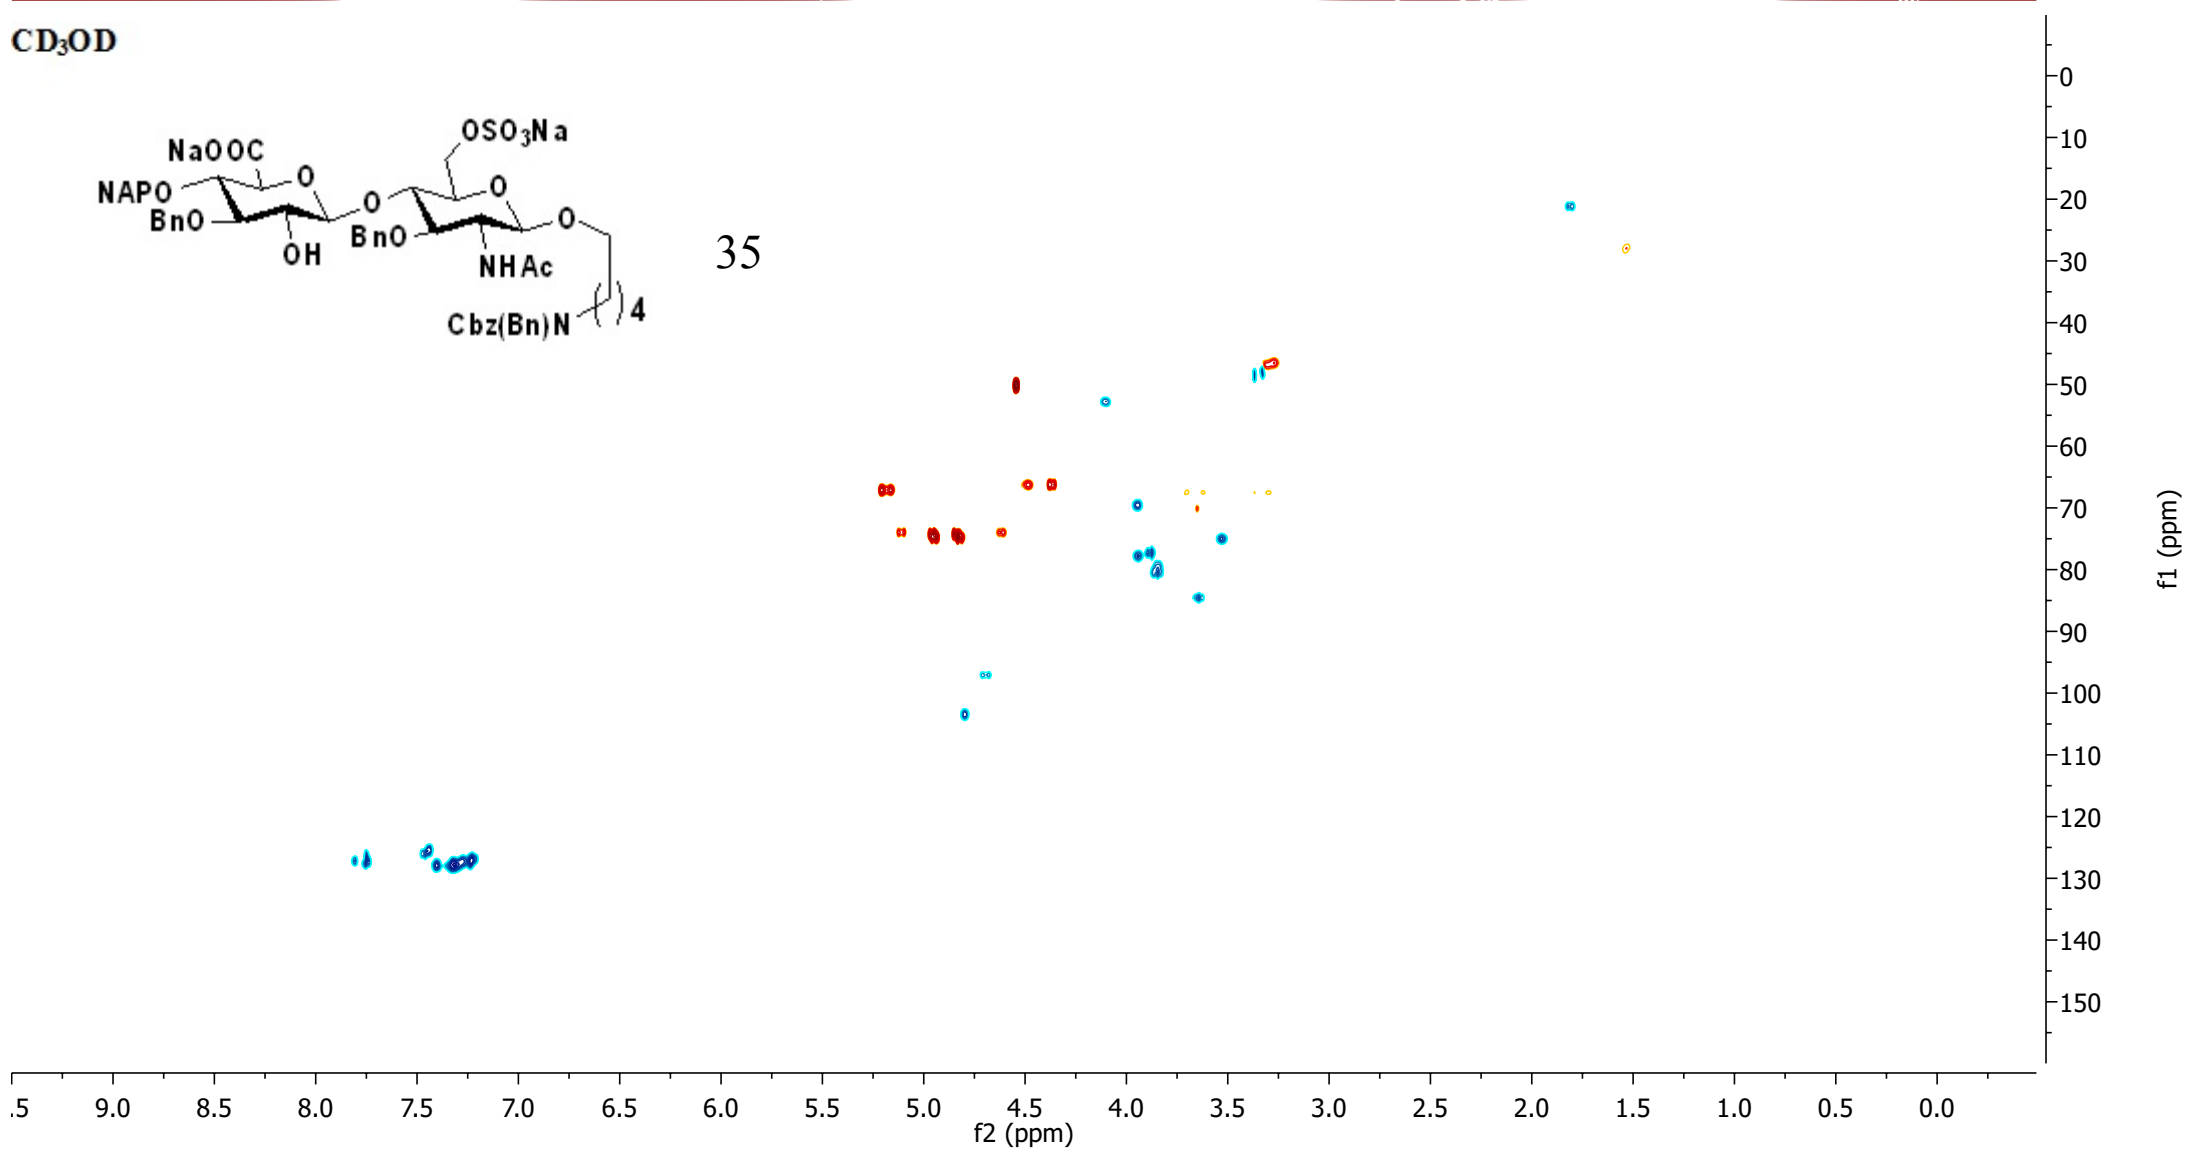

35

D<sub>2</sub>O

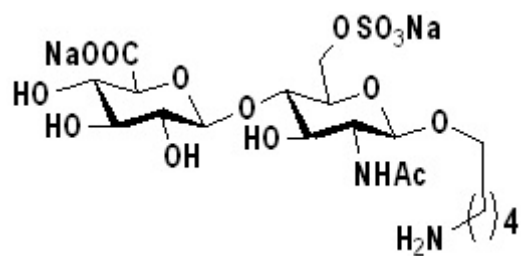

36

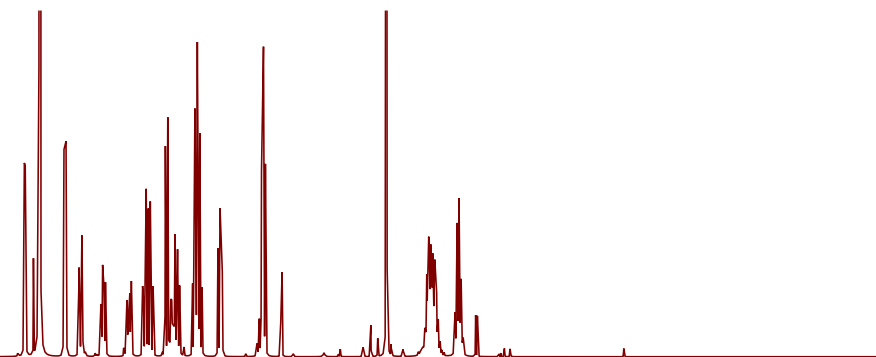

13 12 11 10 9 8 7 6 5 4 3 2 1 0 -1

f2 (ppm)

f1 (ppm)

D<sub>2</sub>O

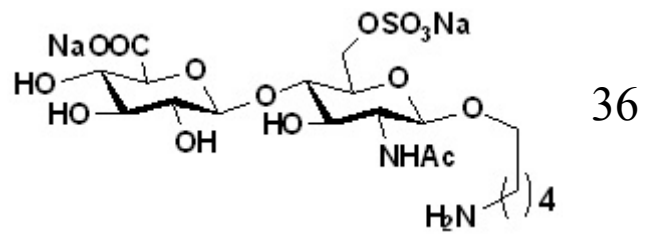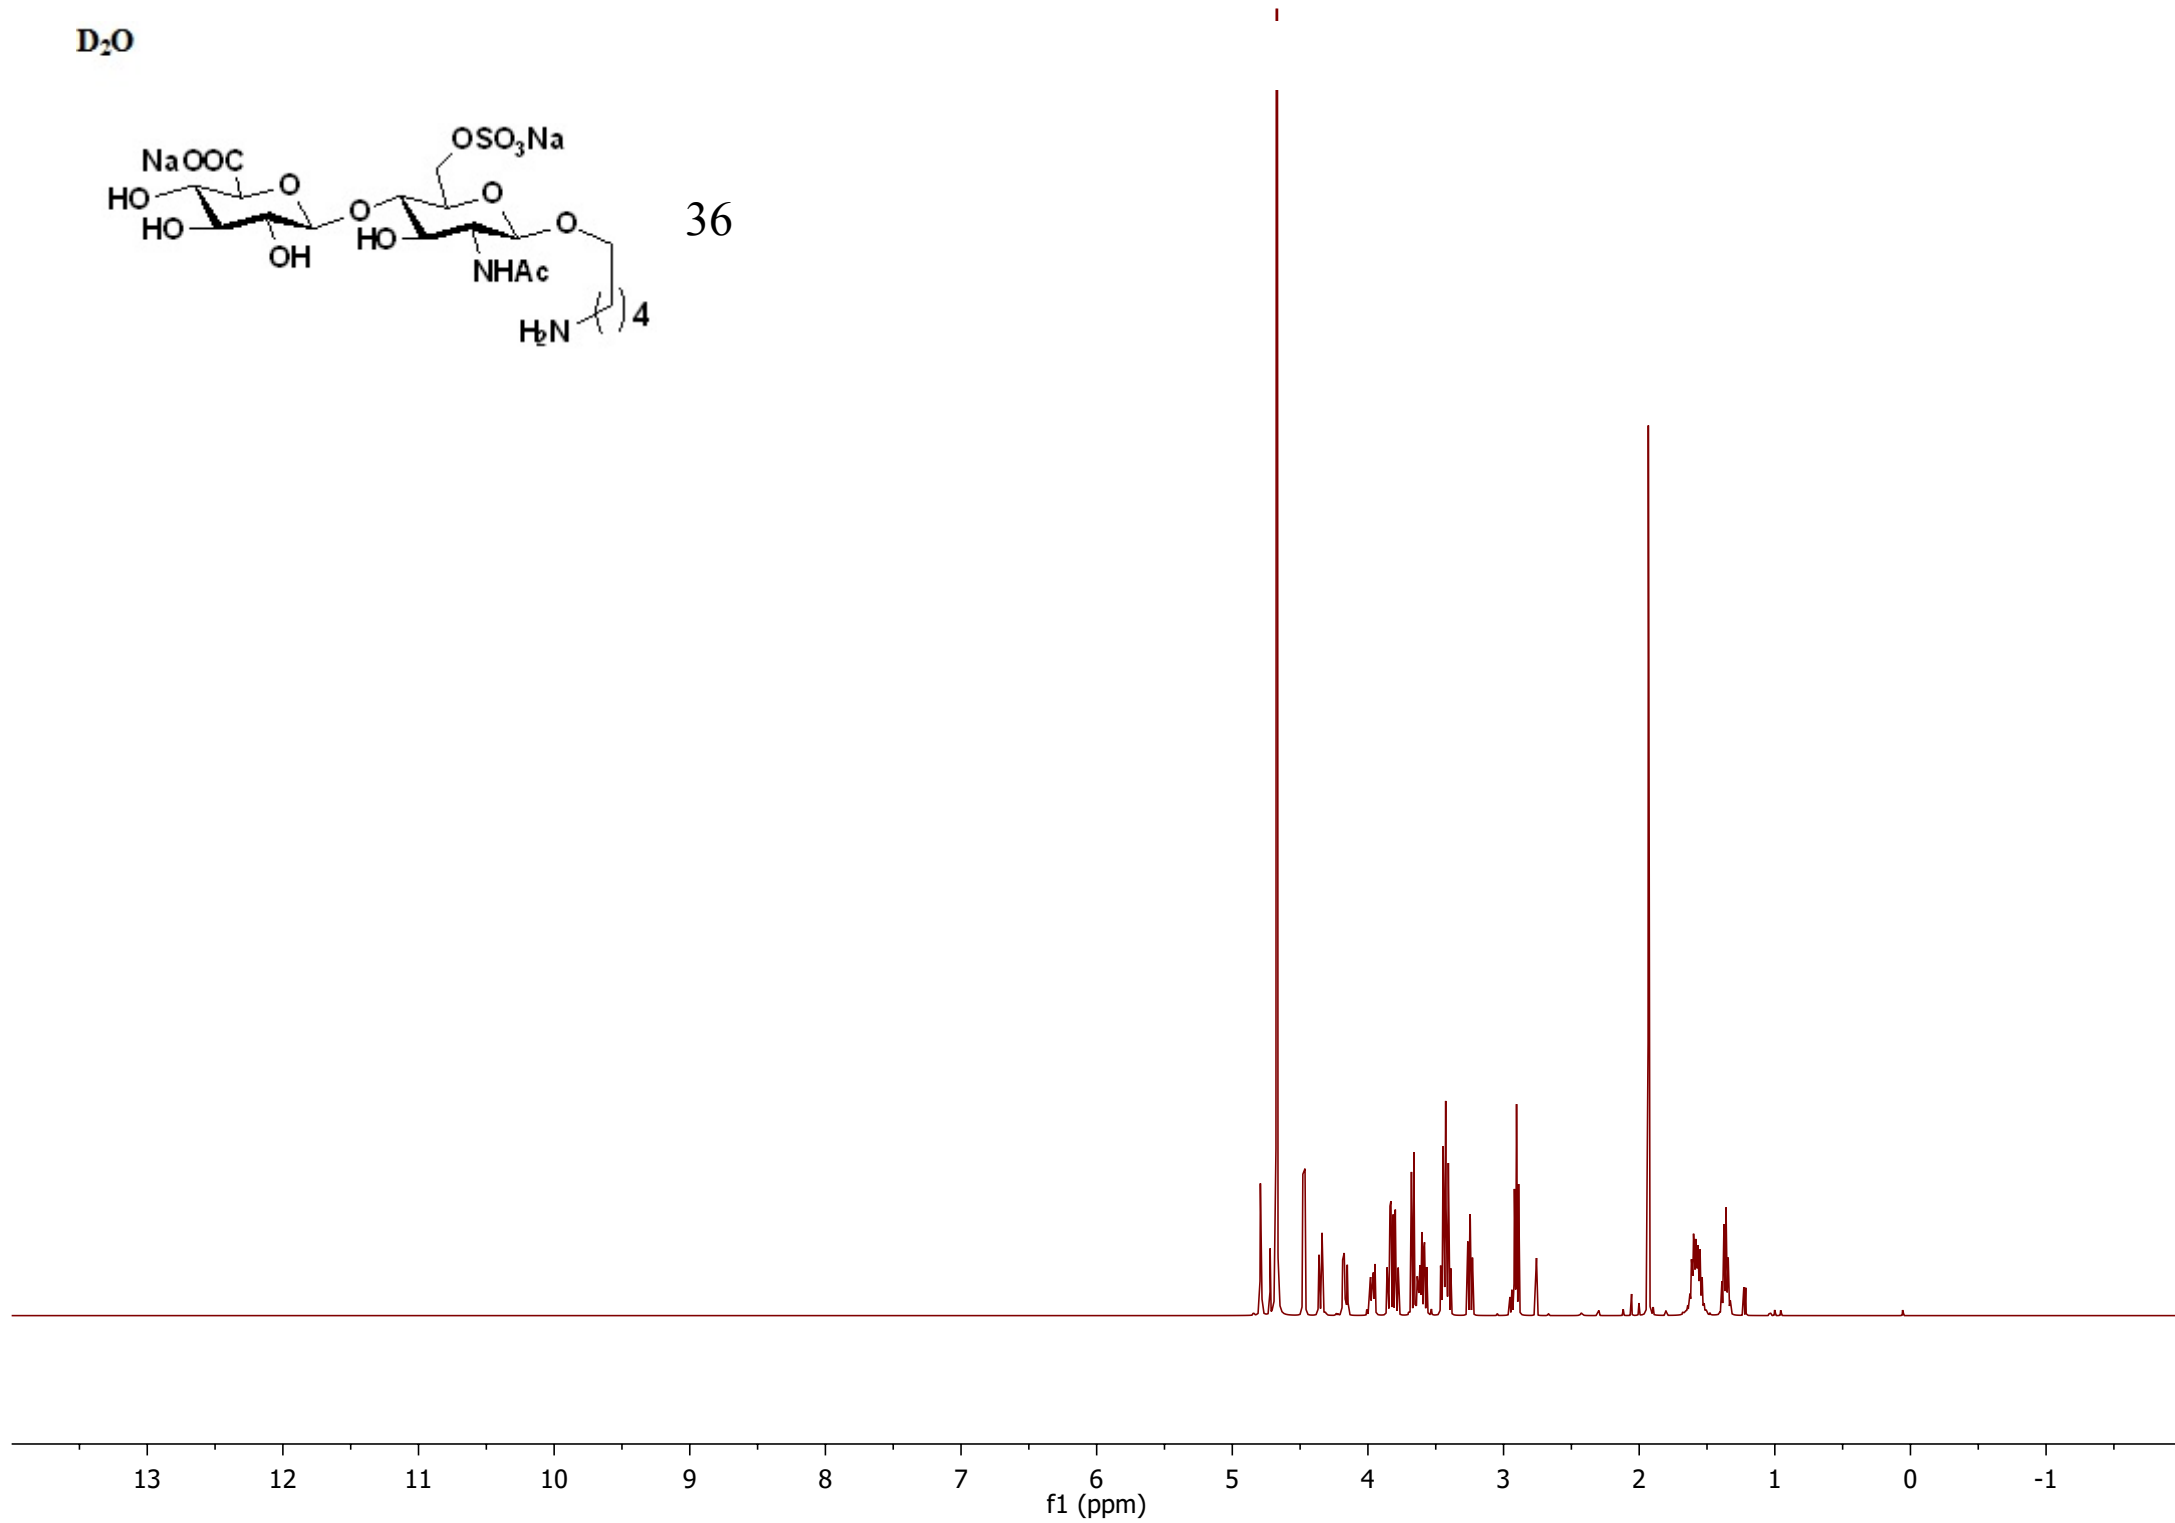

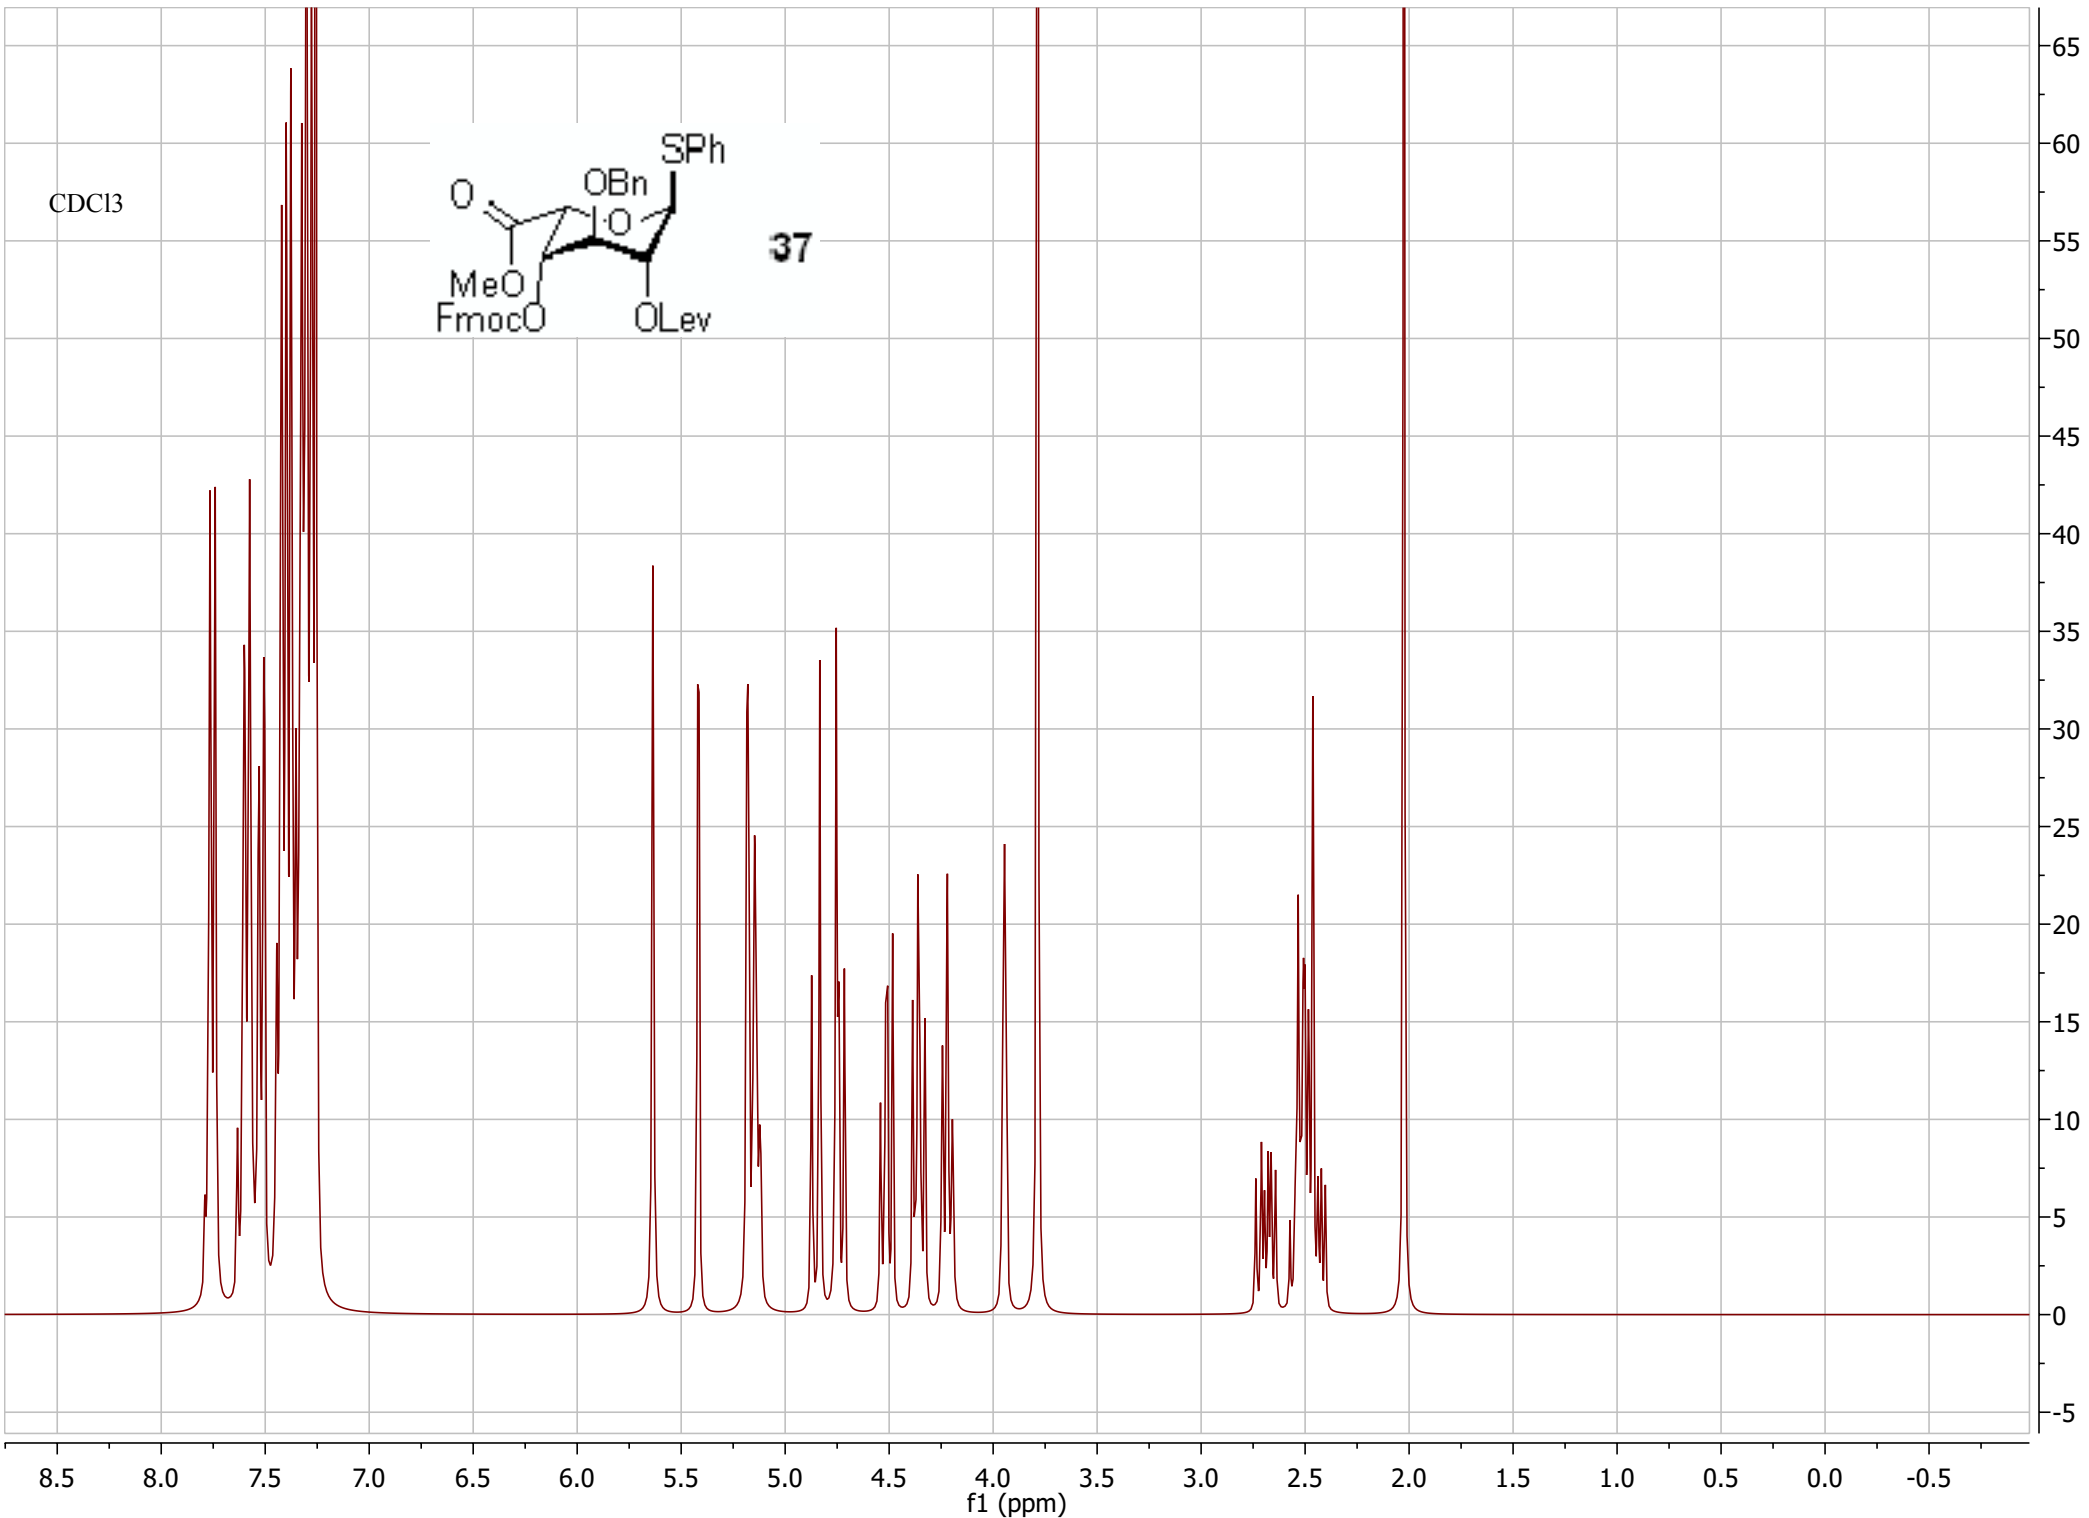

CDCl<sub>3</sub>

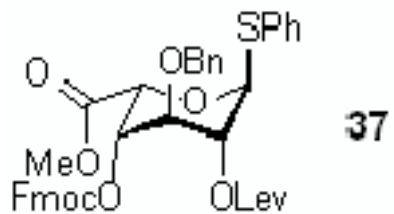

2-78\_Ghsqc\_2013Mar07\_01

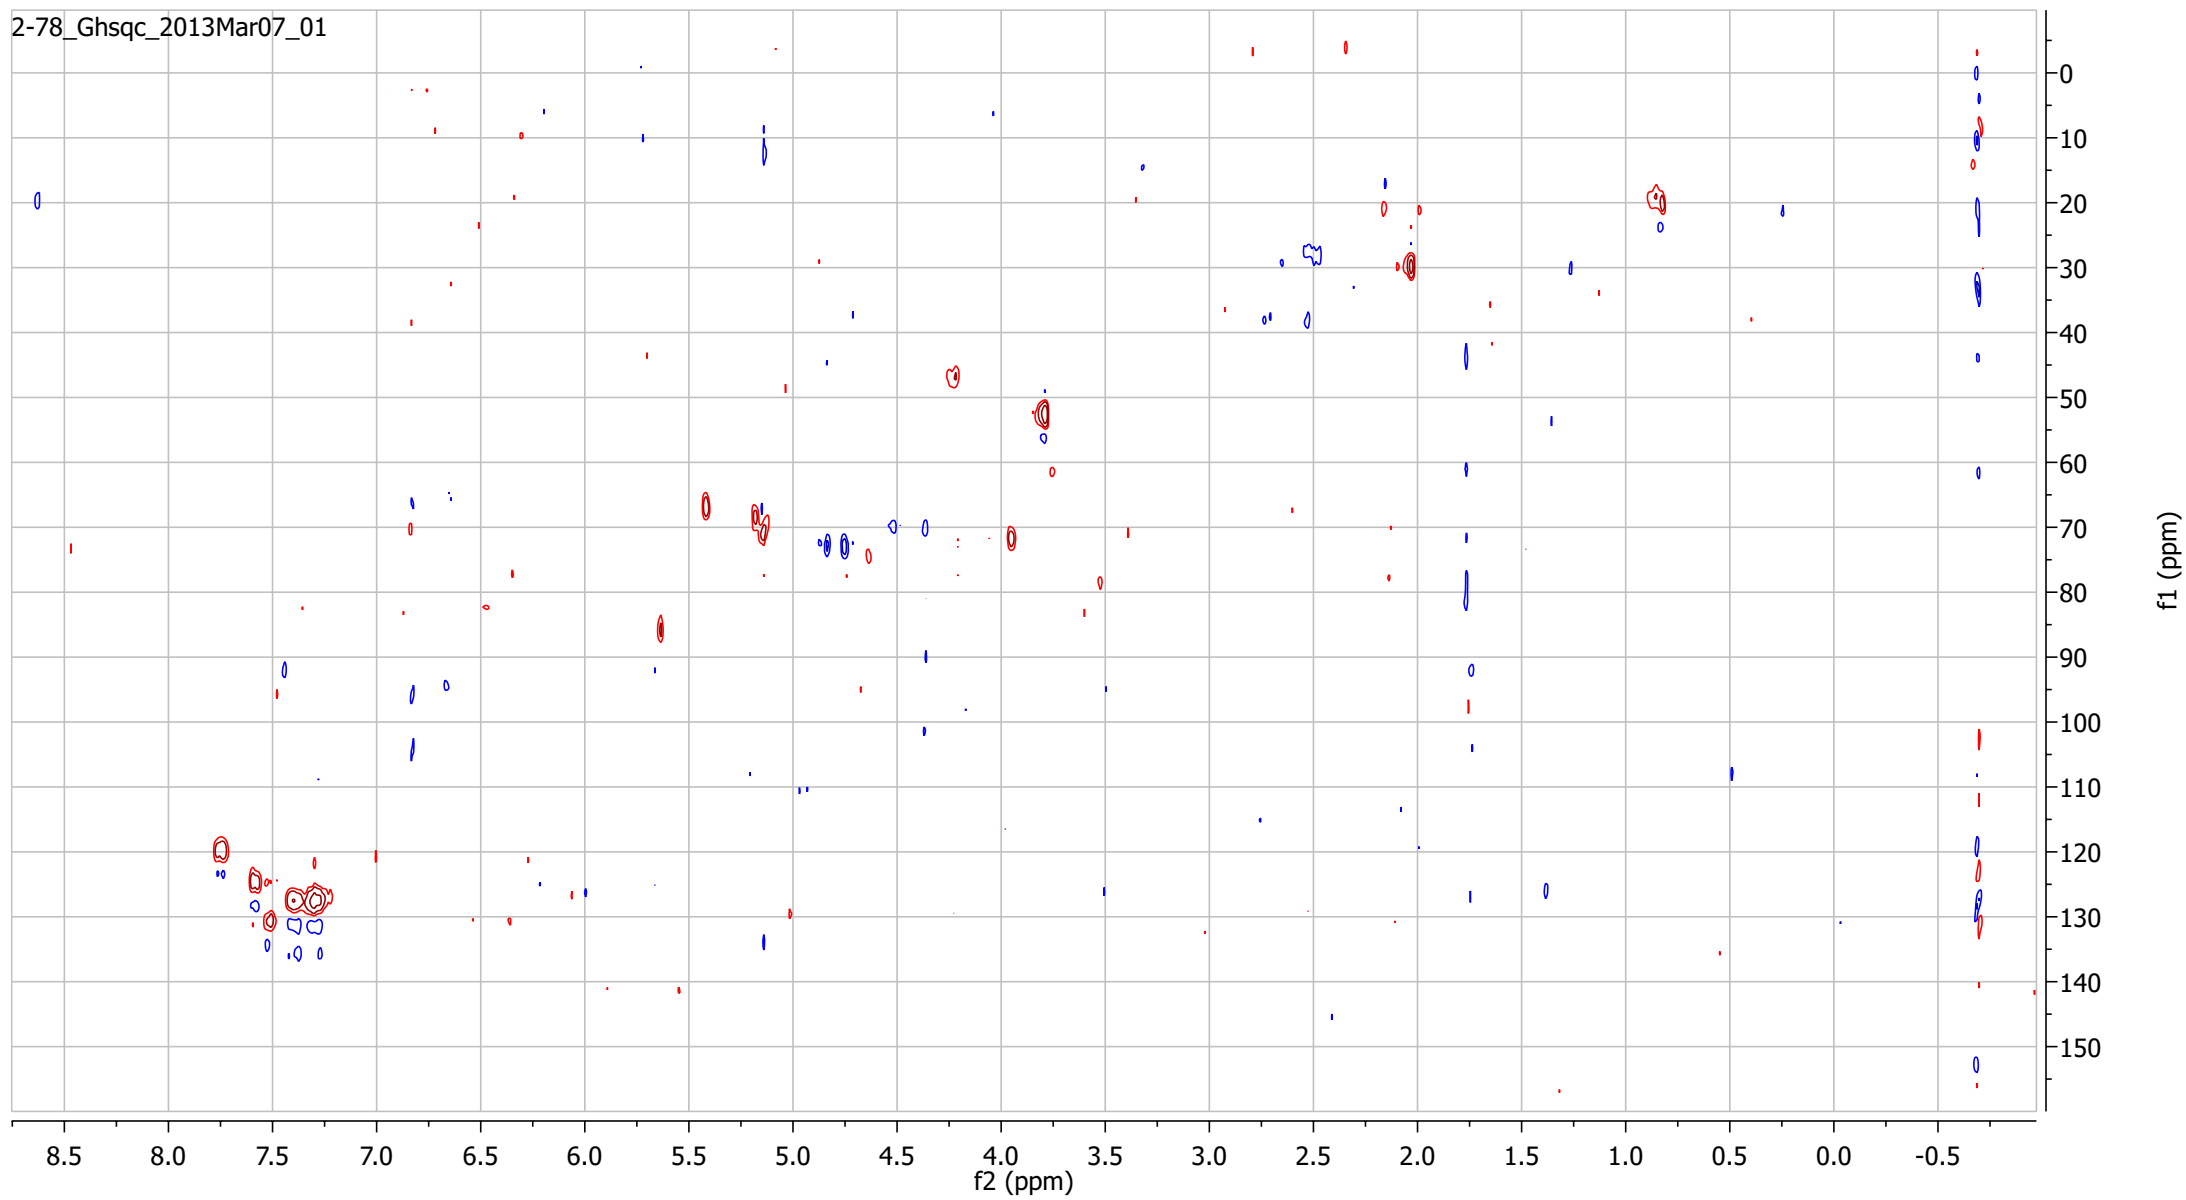



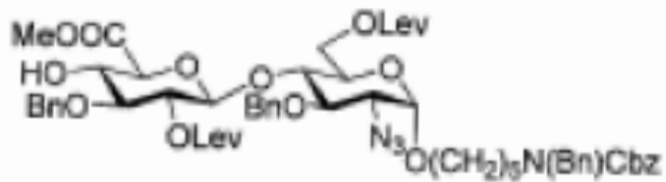

38

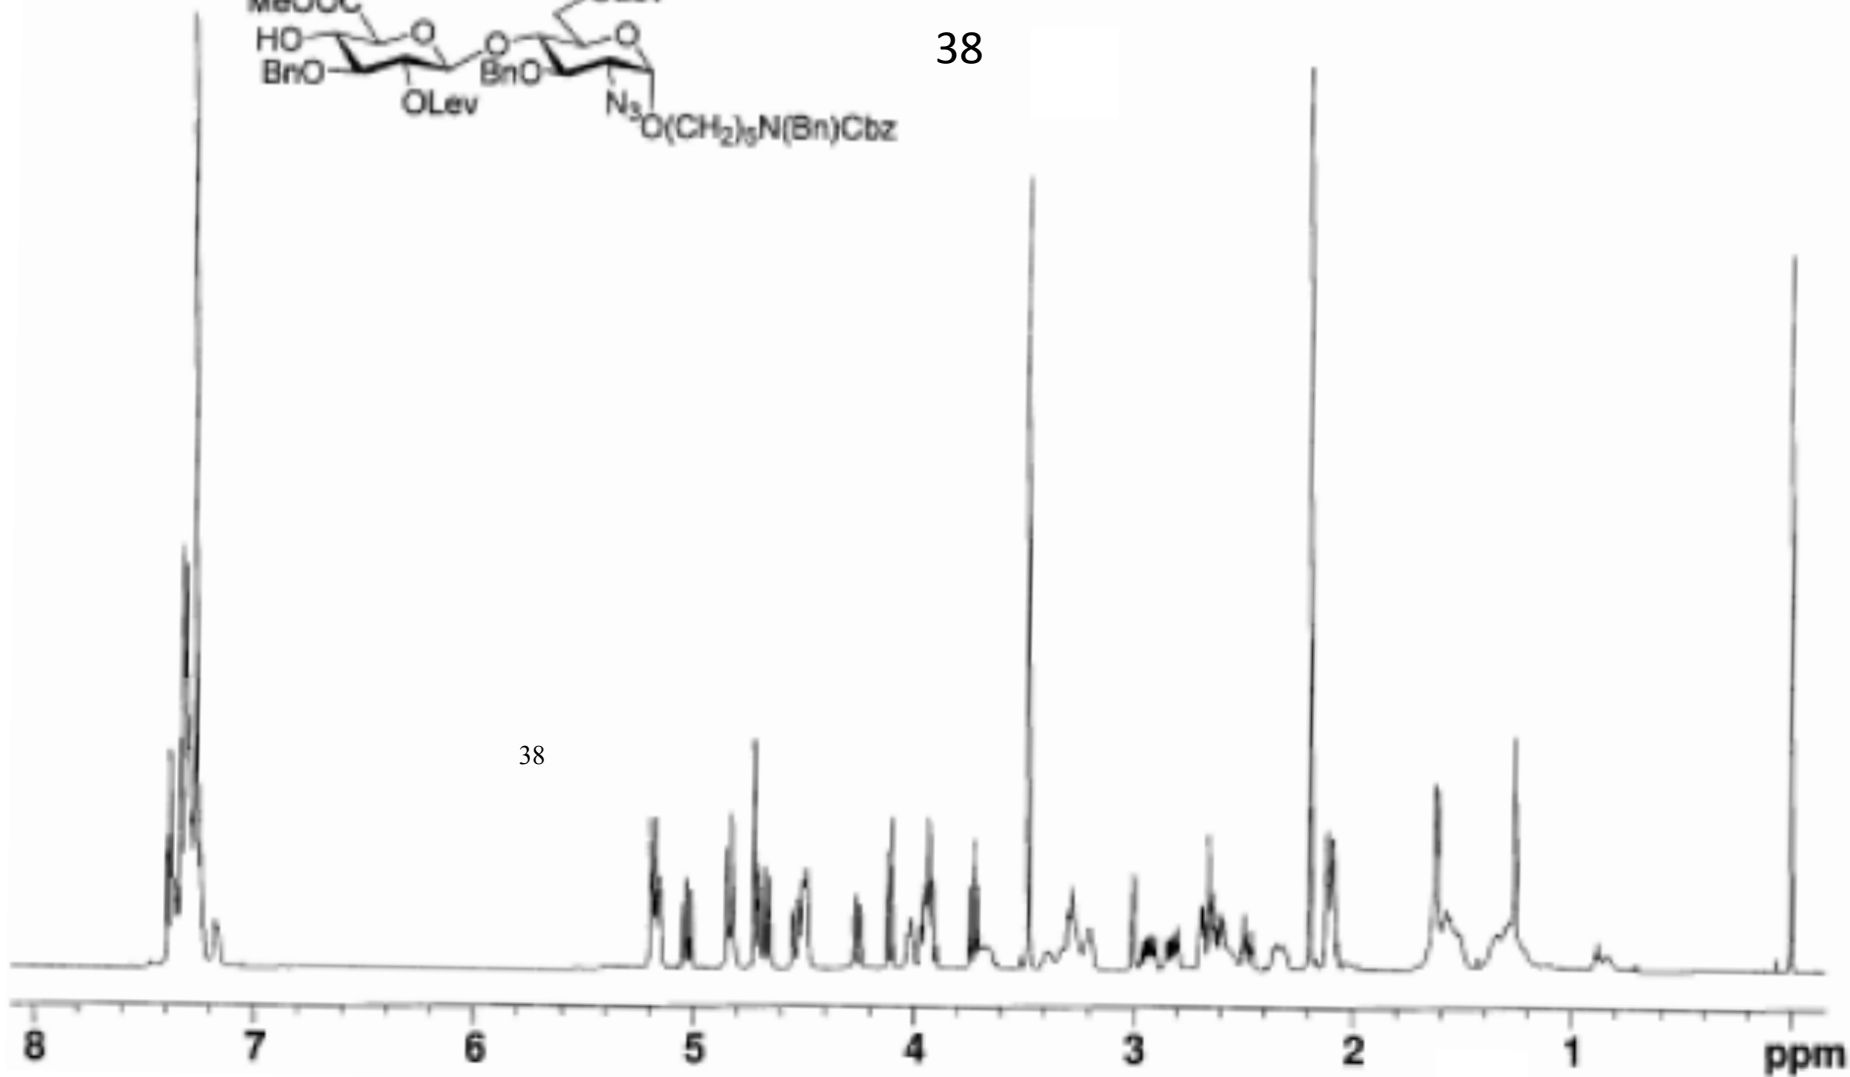

38

CDCl<sub>3</sub>

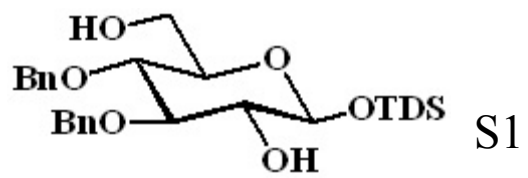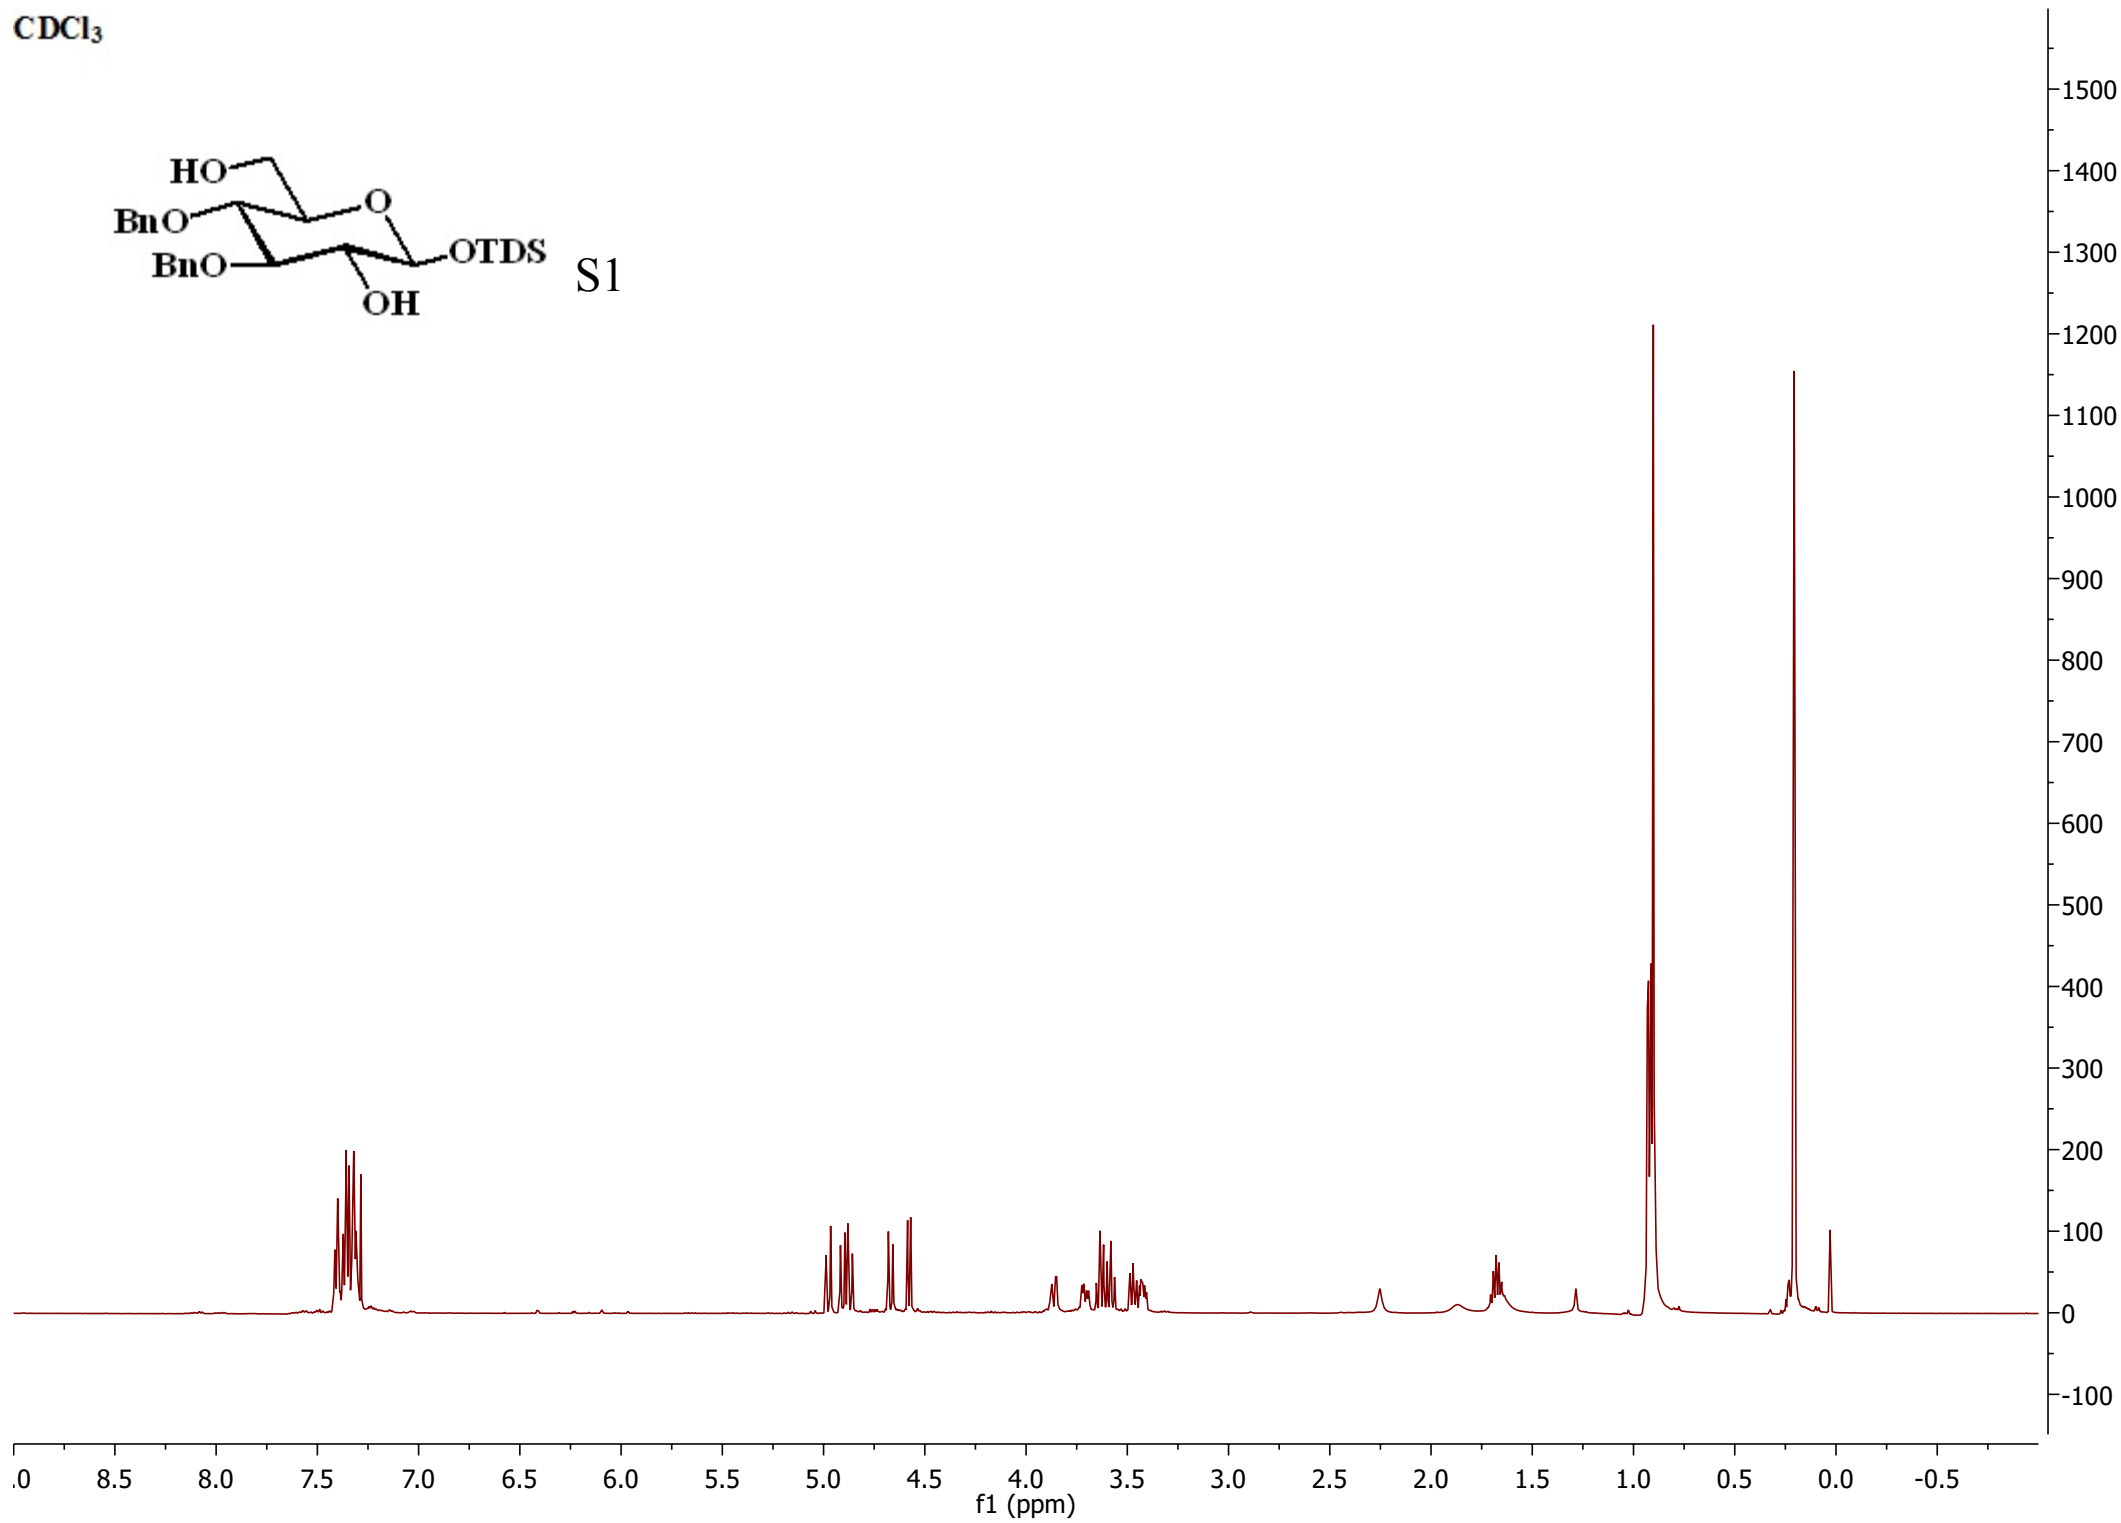

CDCl<sub>3</sub>

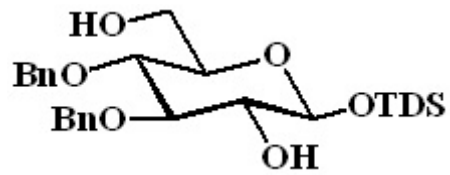

S1

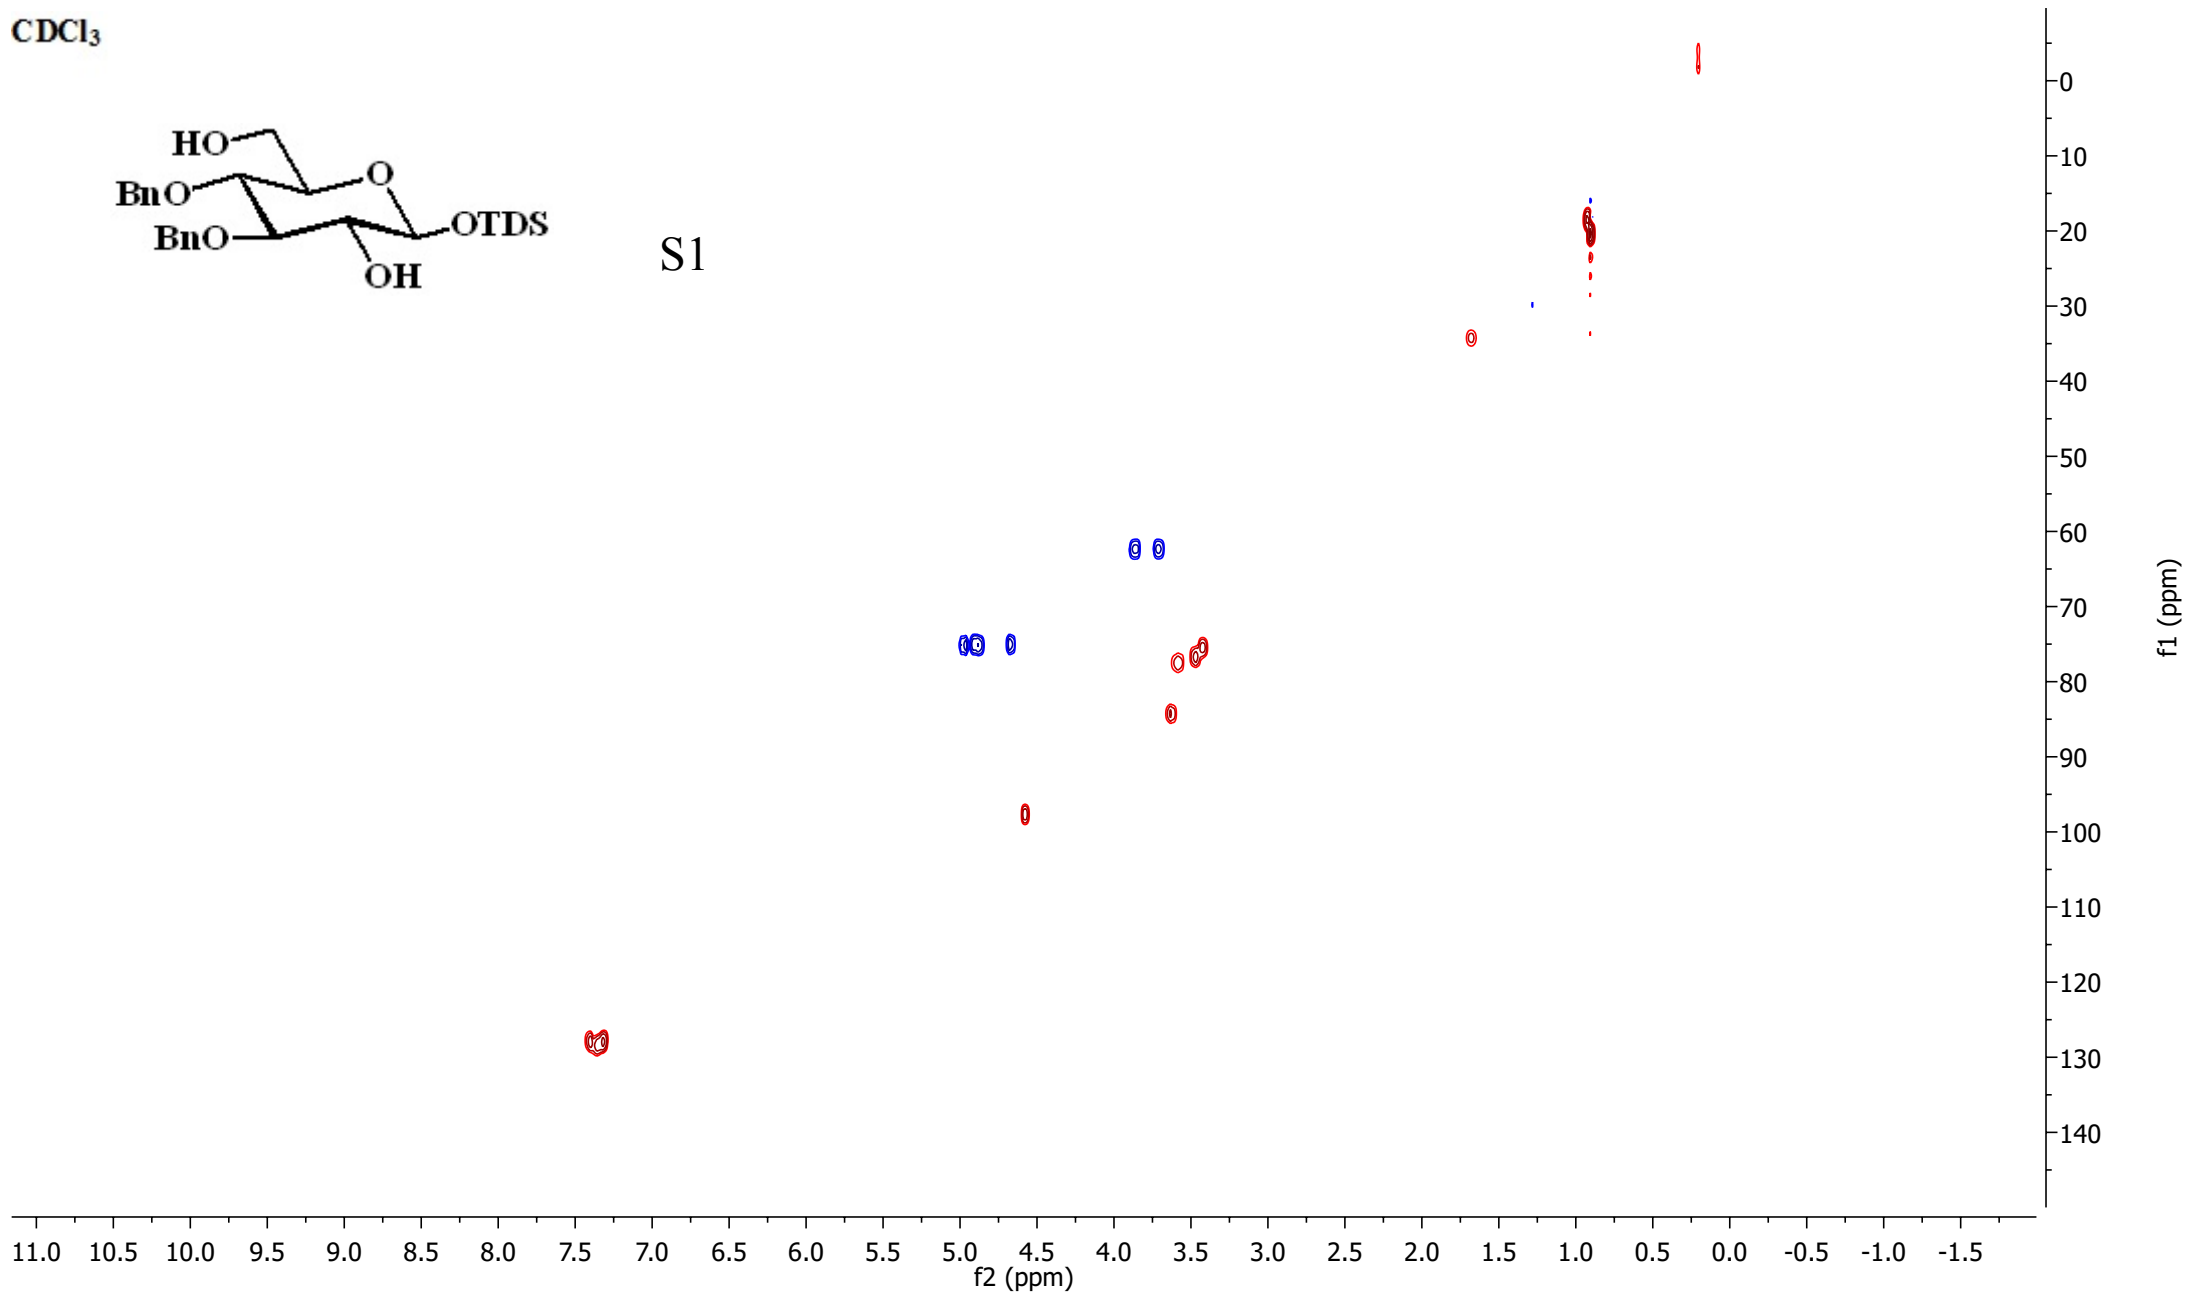

CDCl<sub>3</sub>

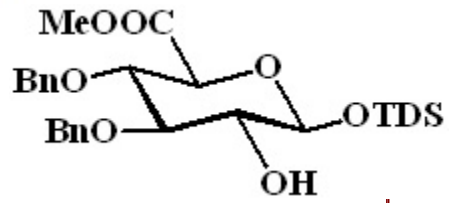

S2

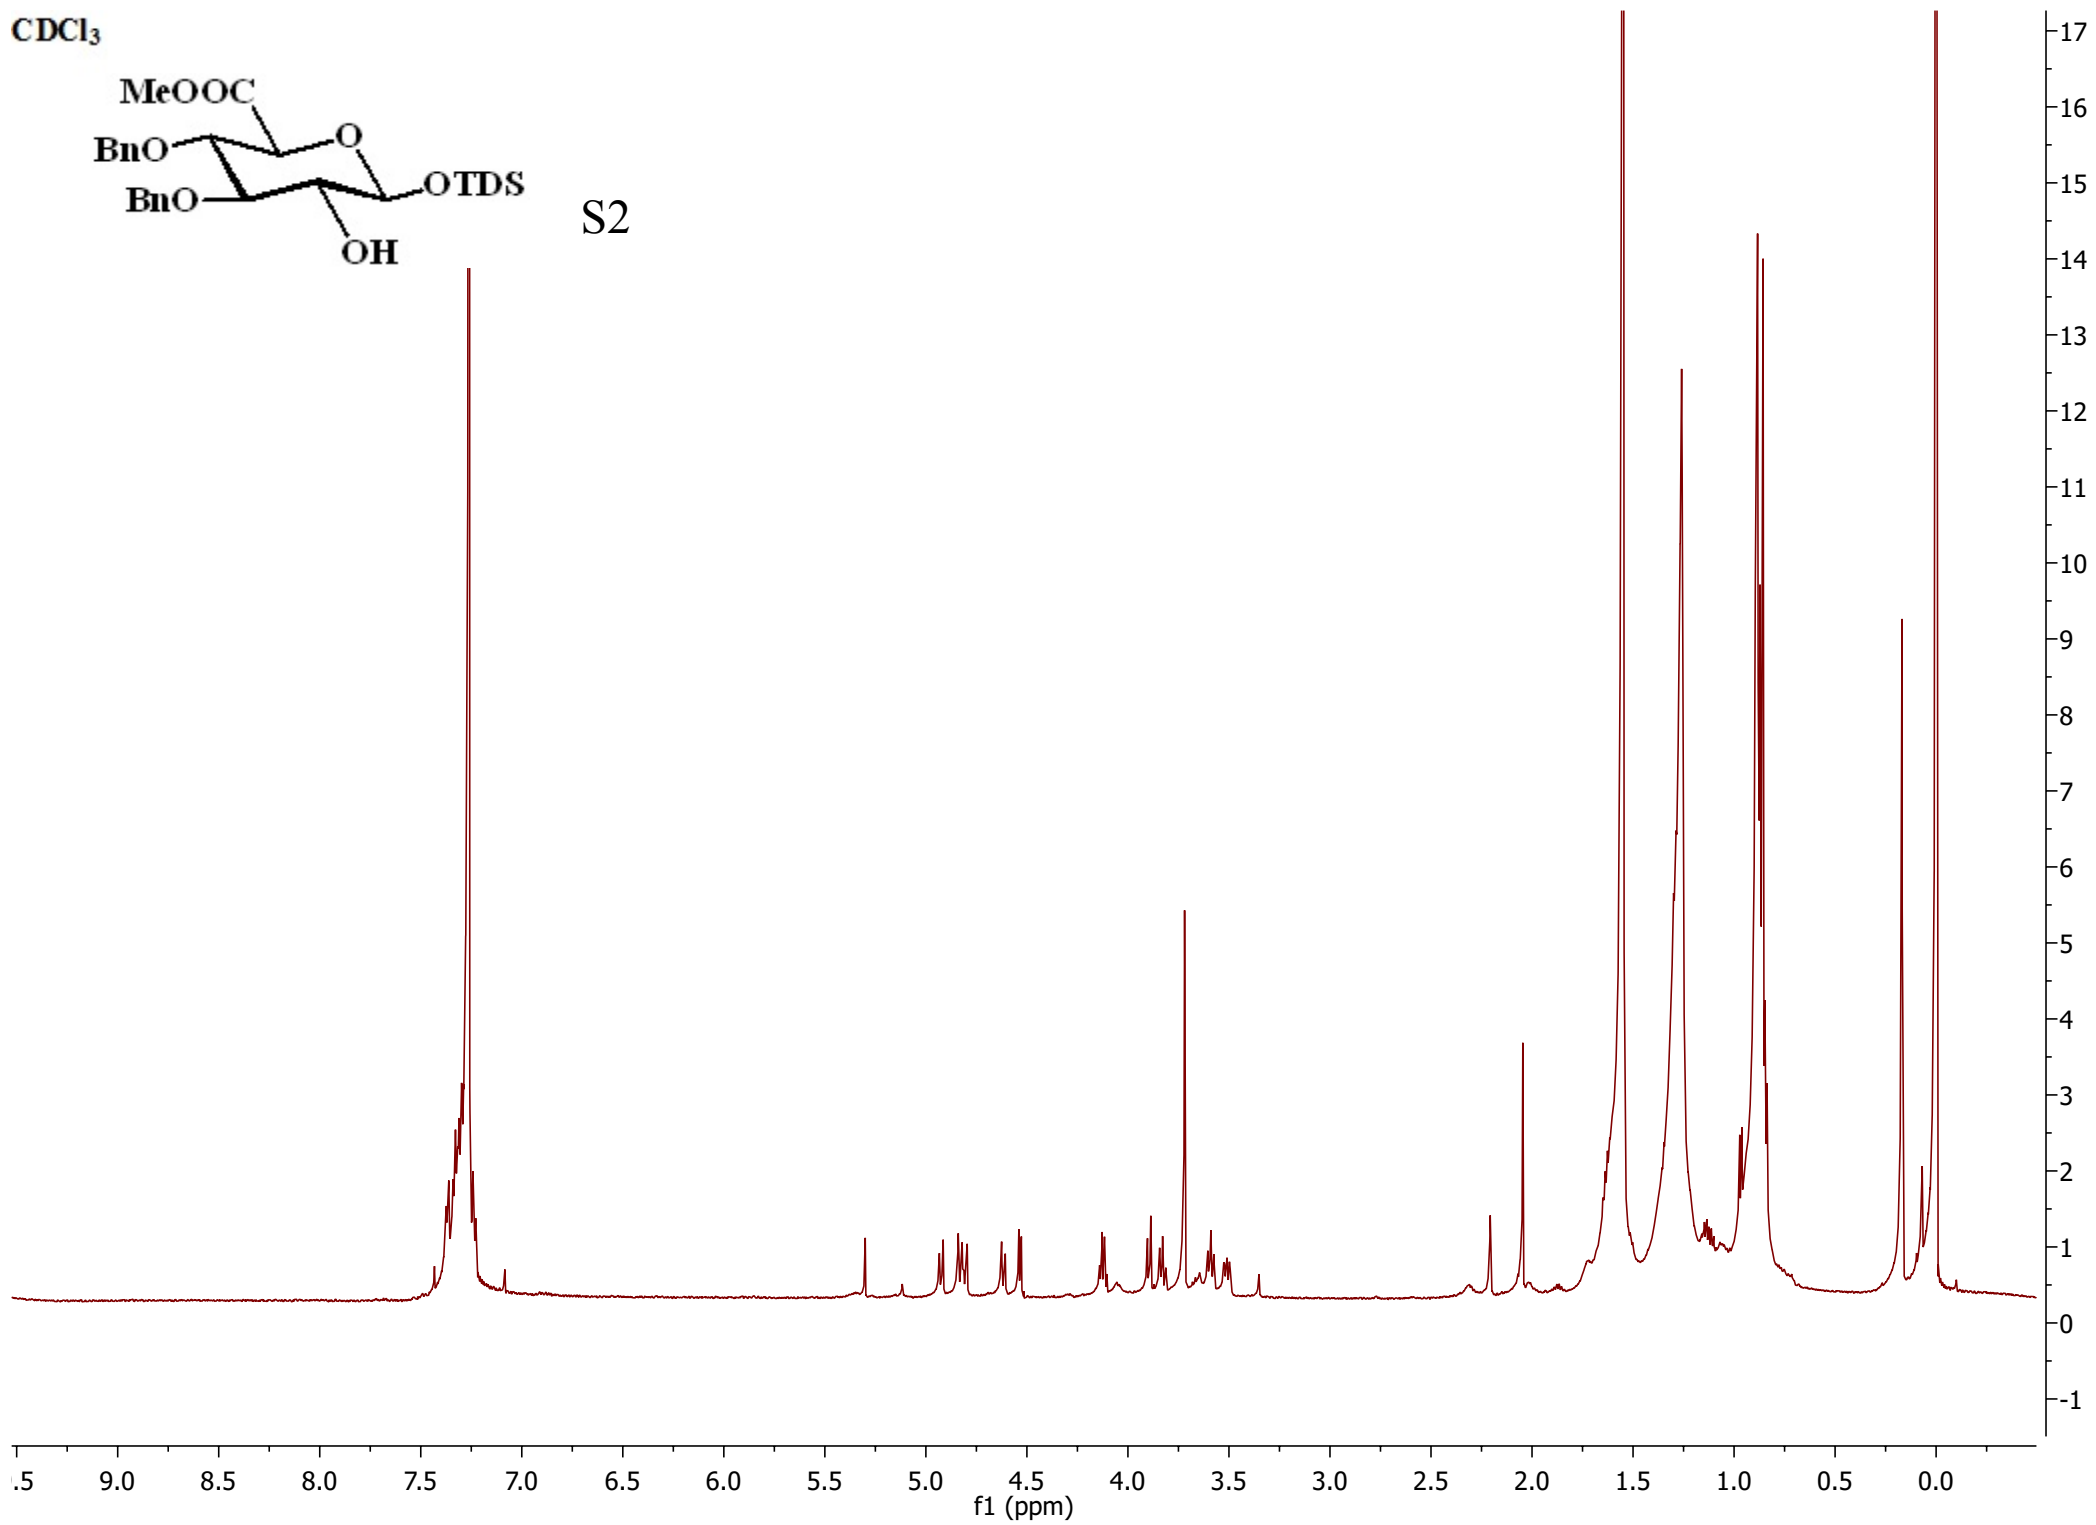

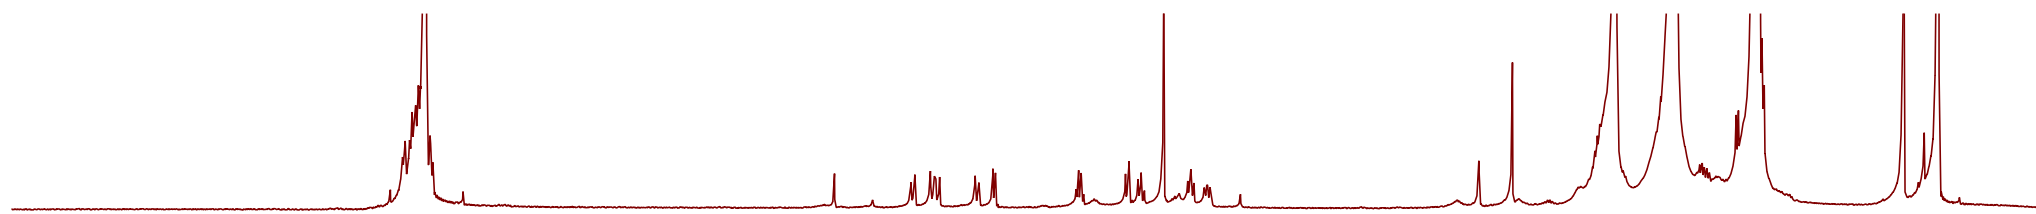

525 HSQC  
OD-OHCOOMe

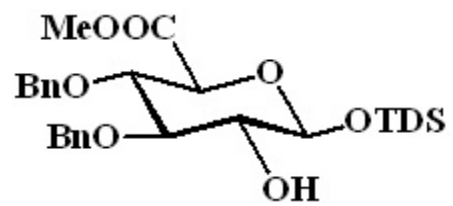

S2

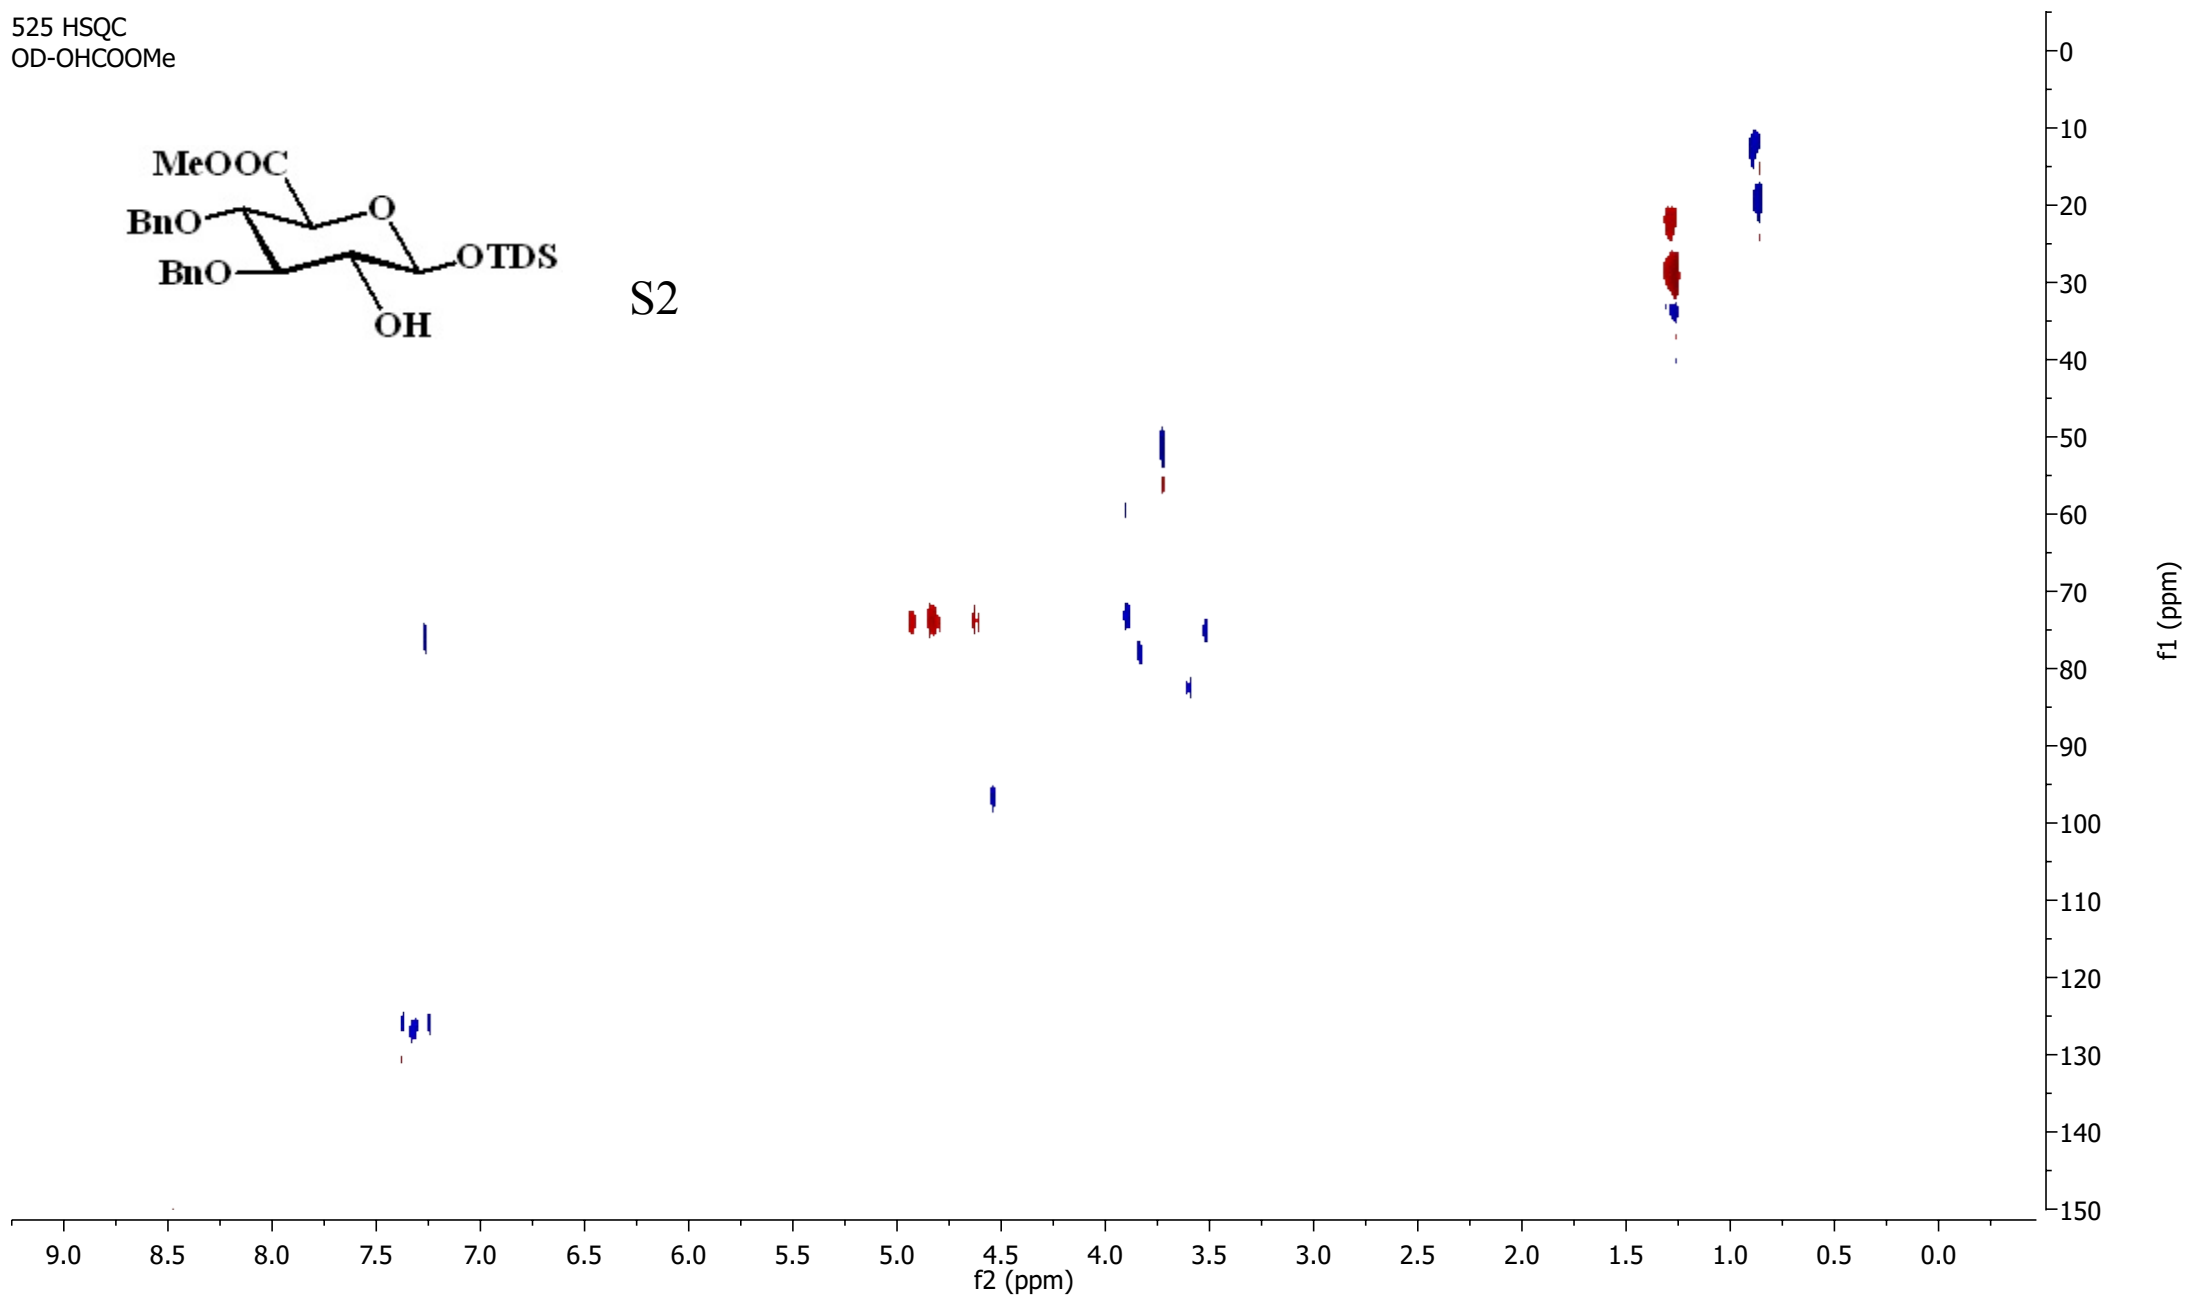

CDCl<sub>3</sub>

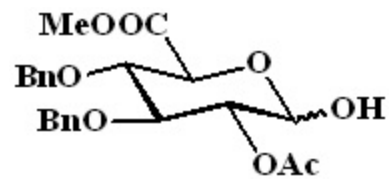

S3

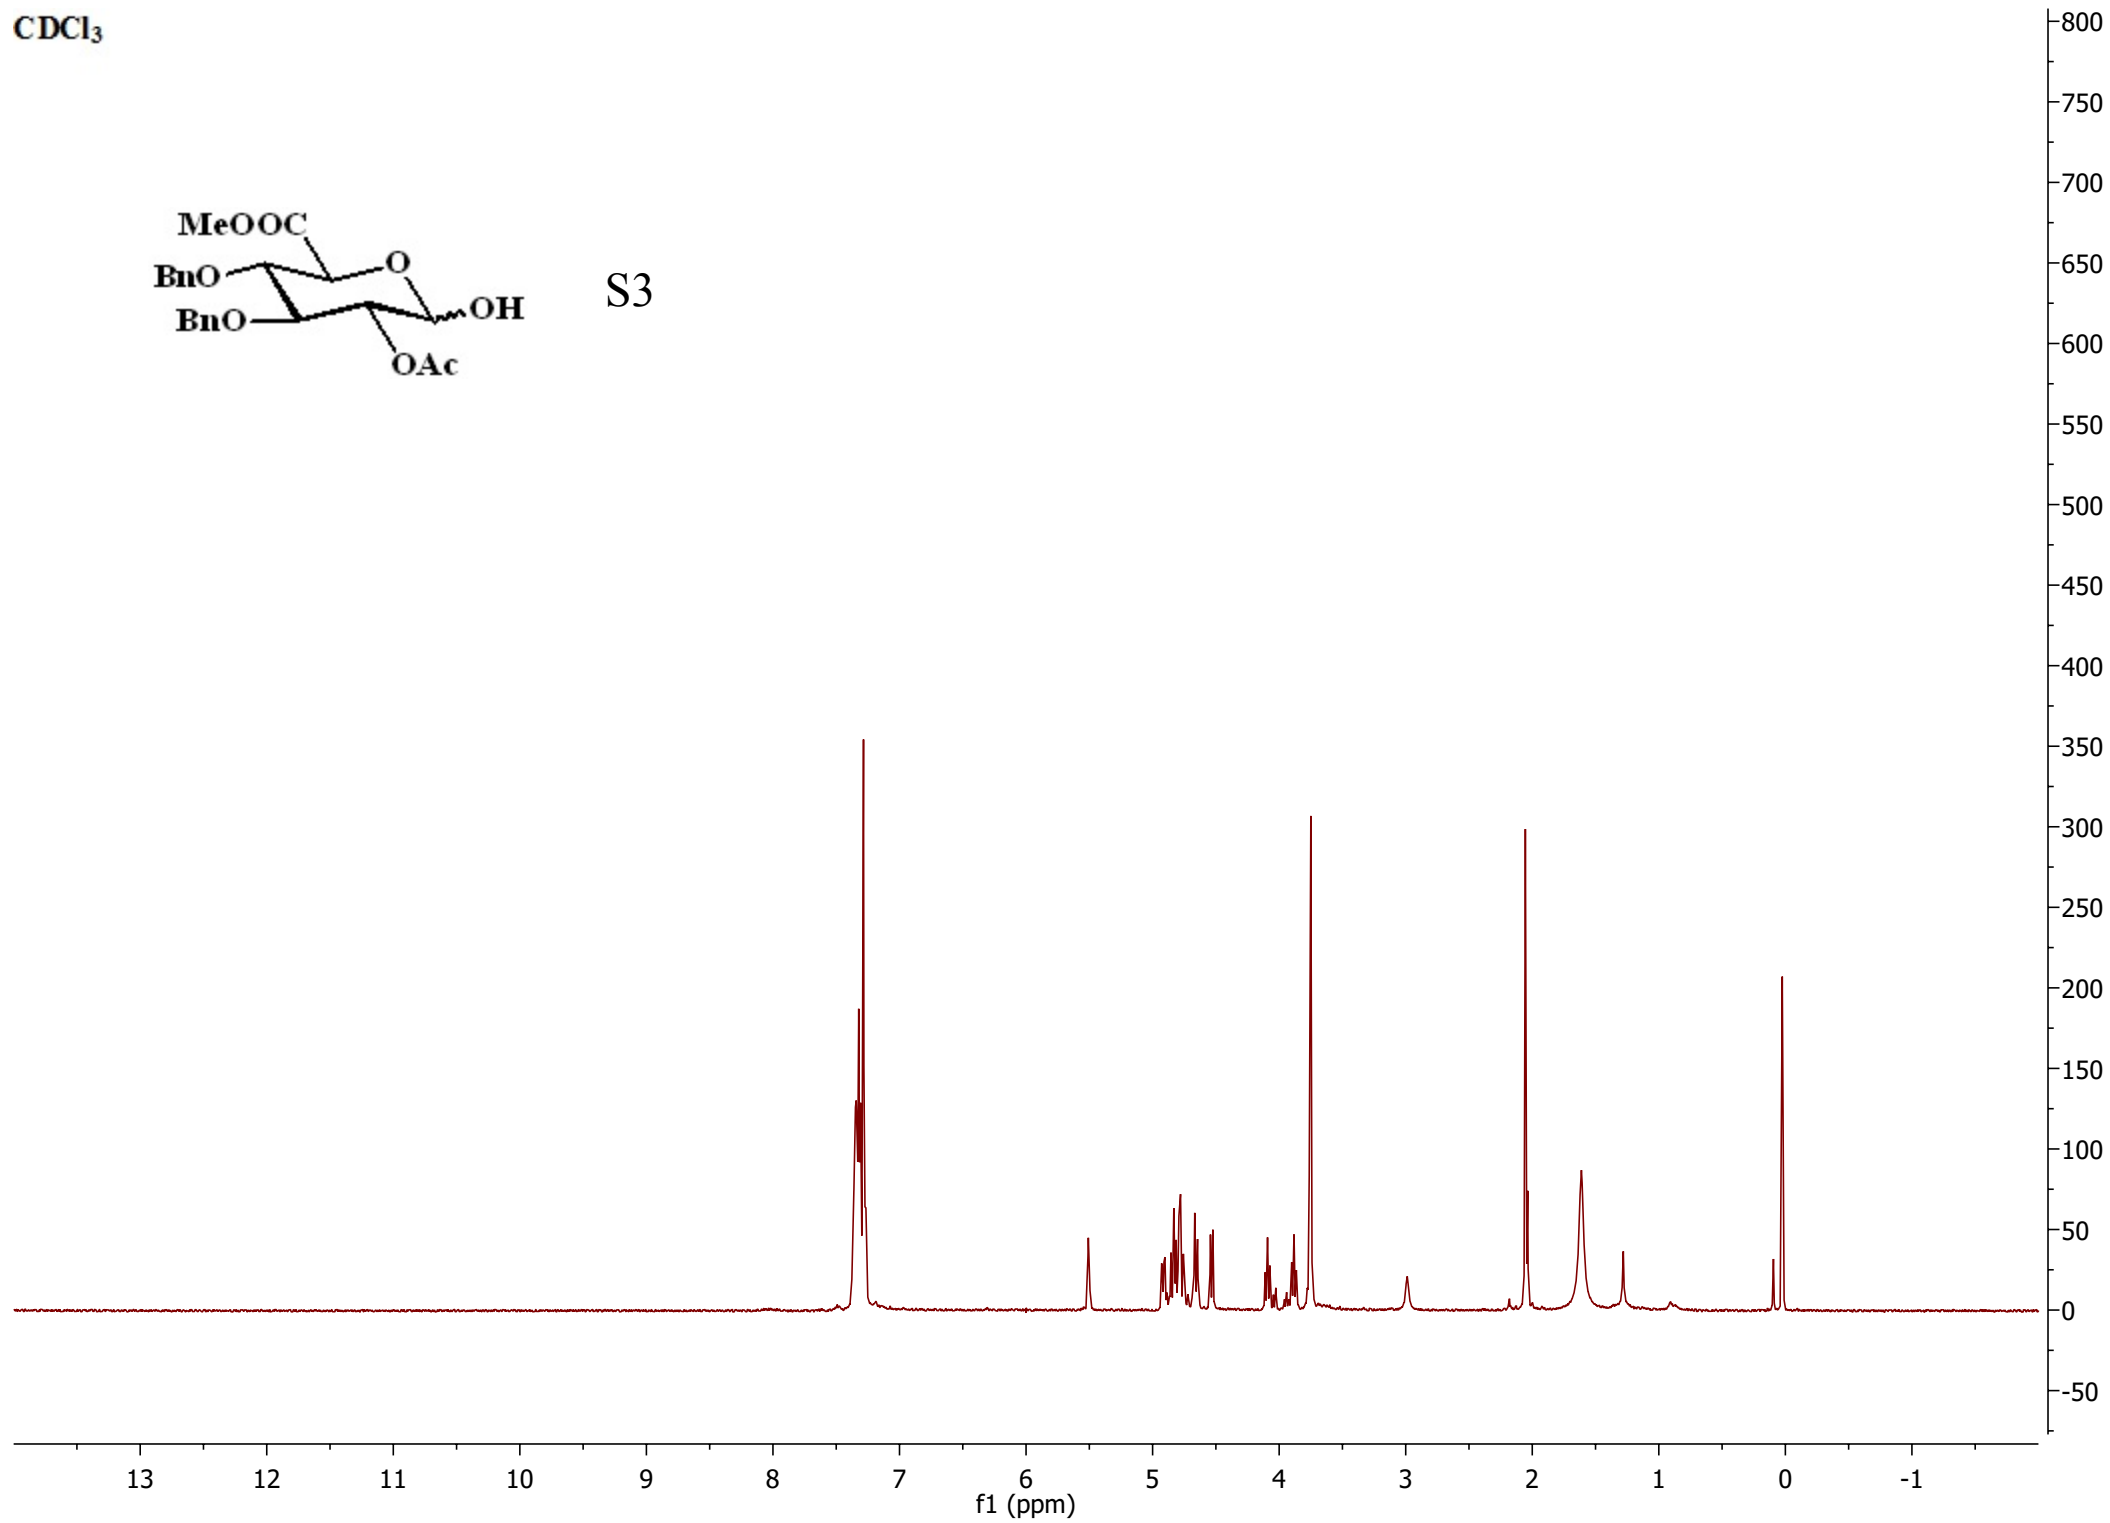

CDCl<sub>3</sub>

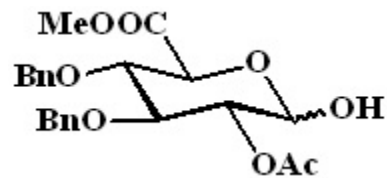

S3

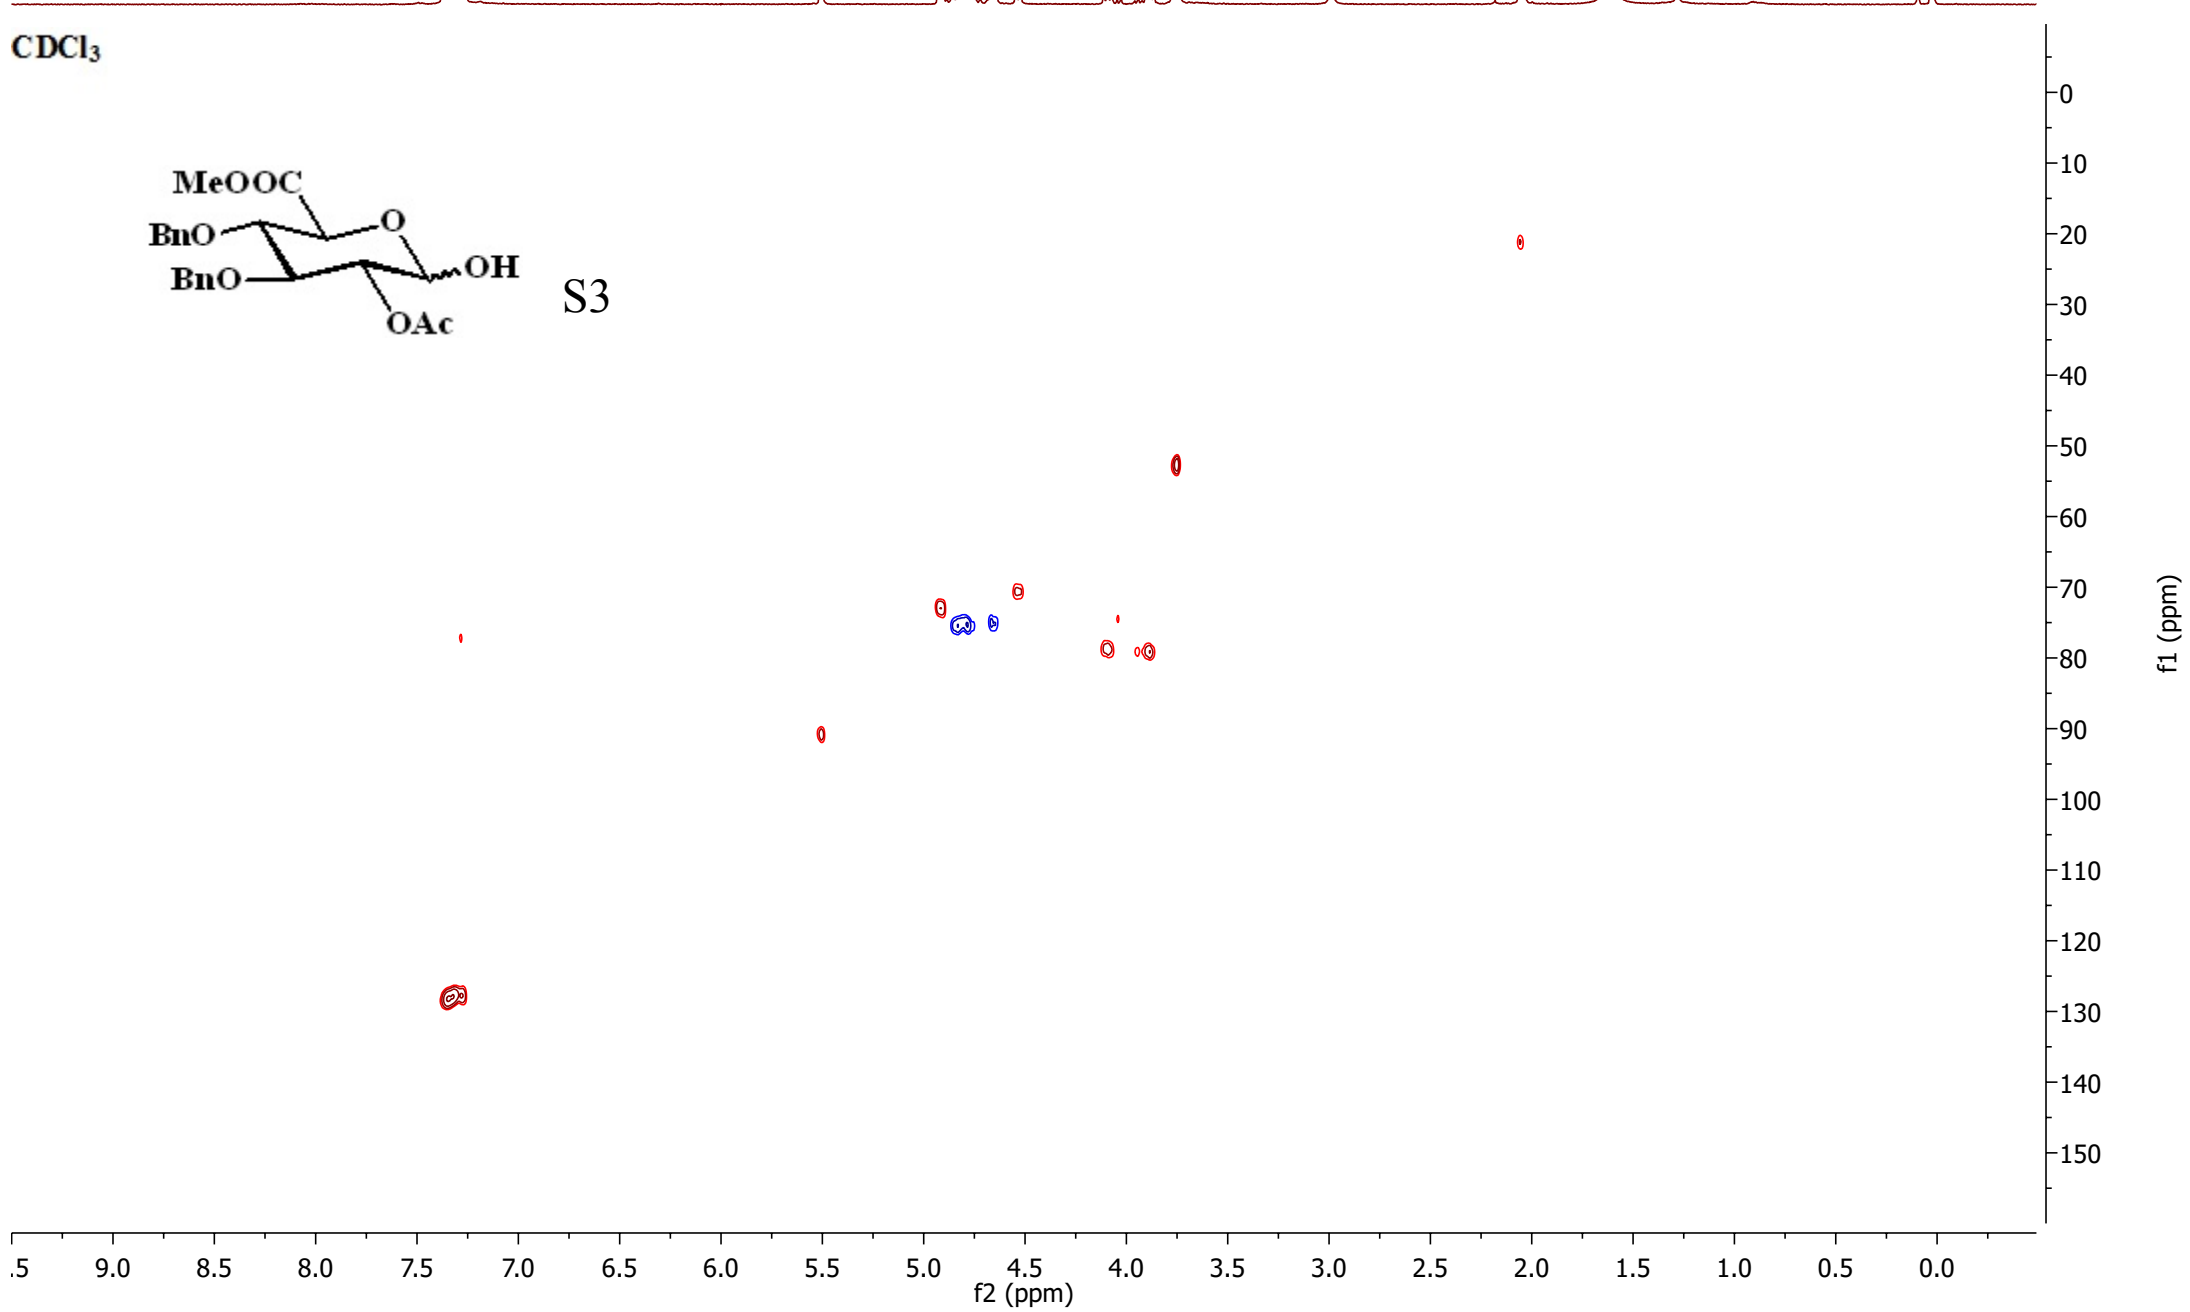

CDCl<sub>3</sub>

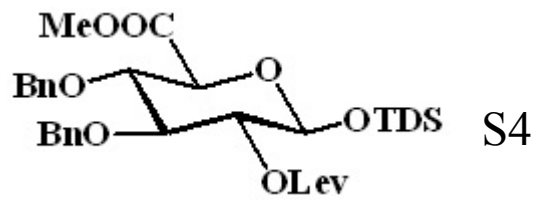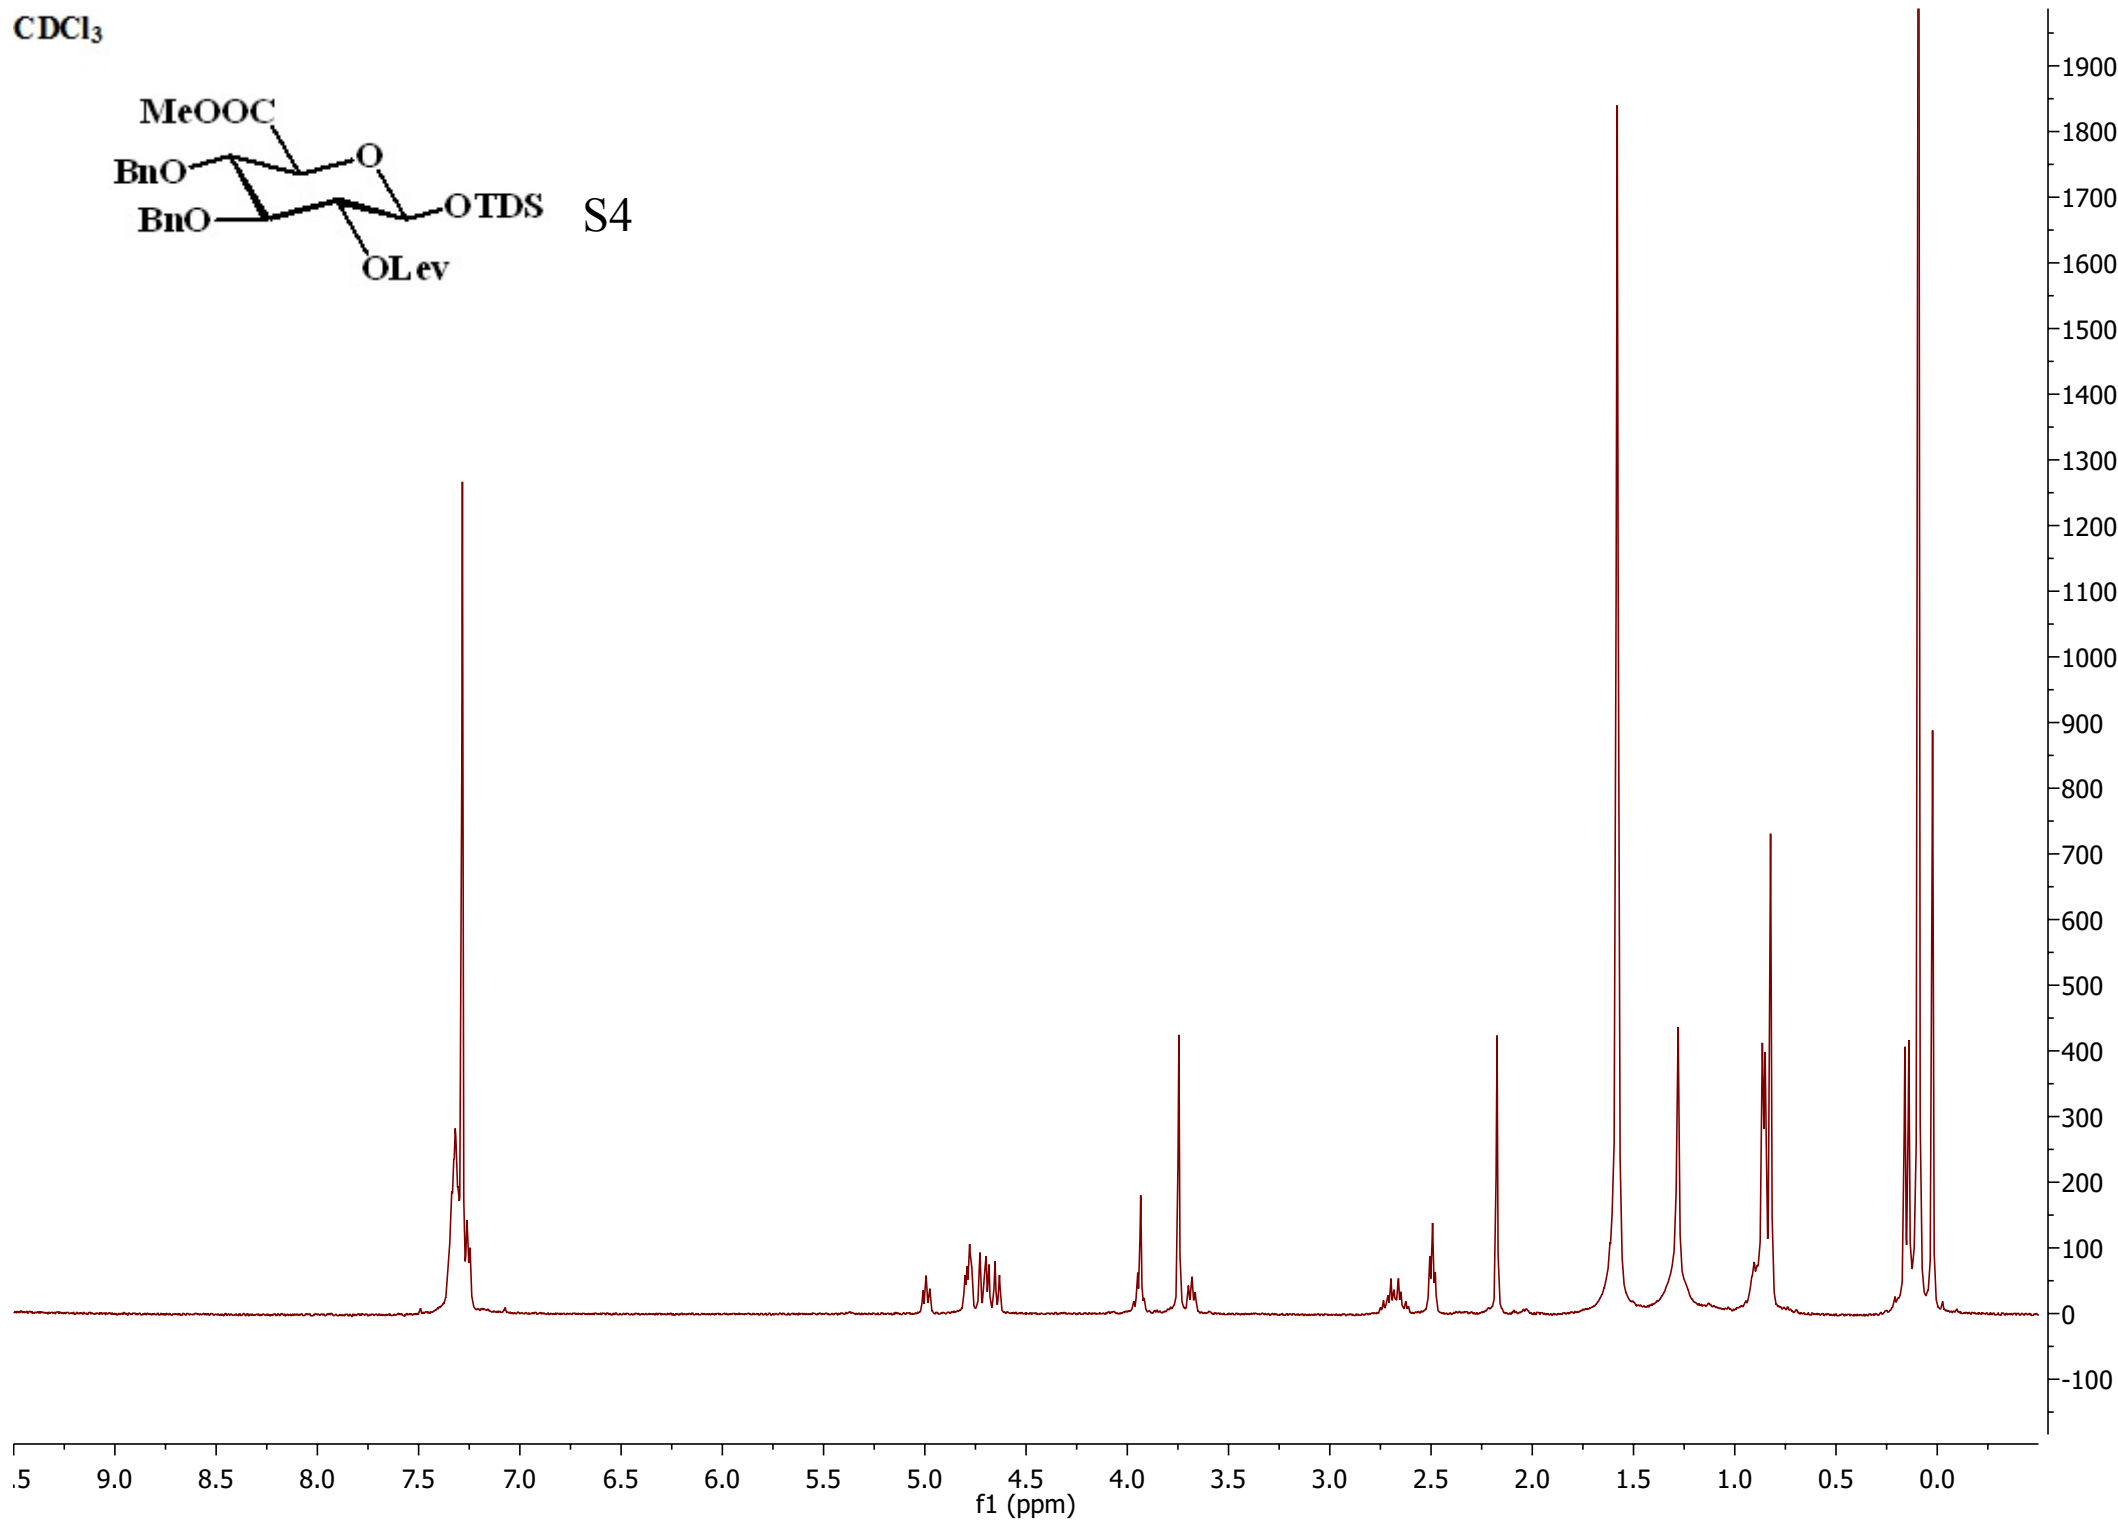



CDCl<sub>3</sub>

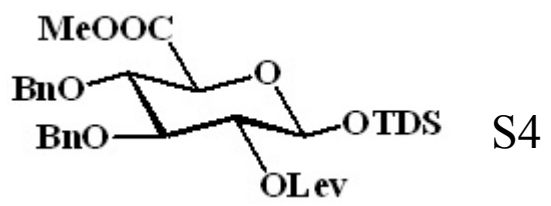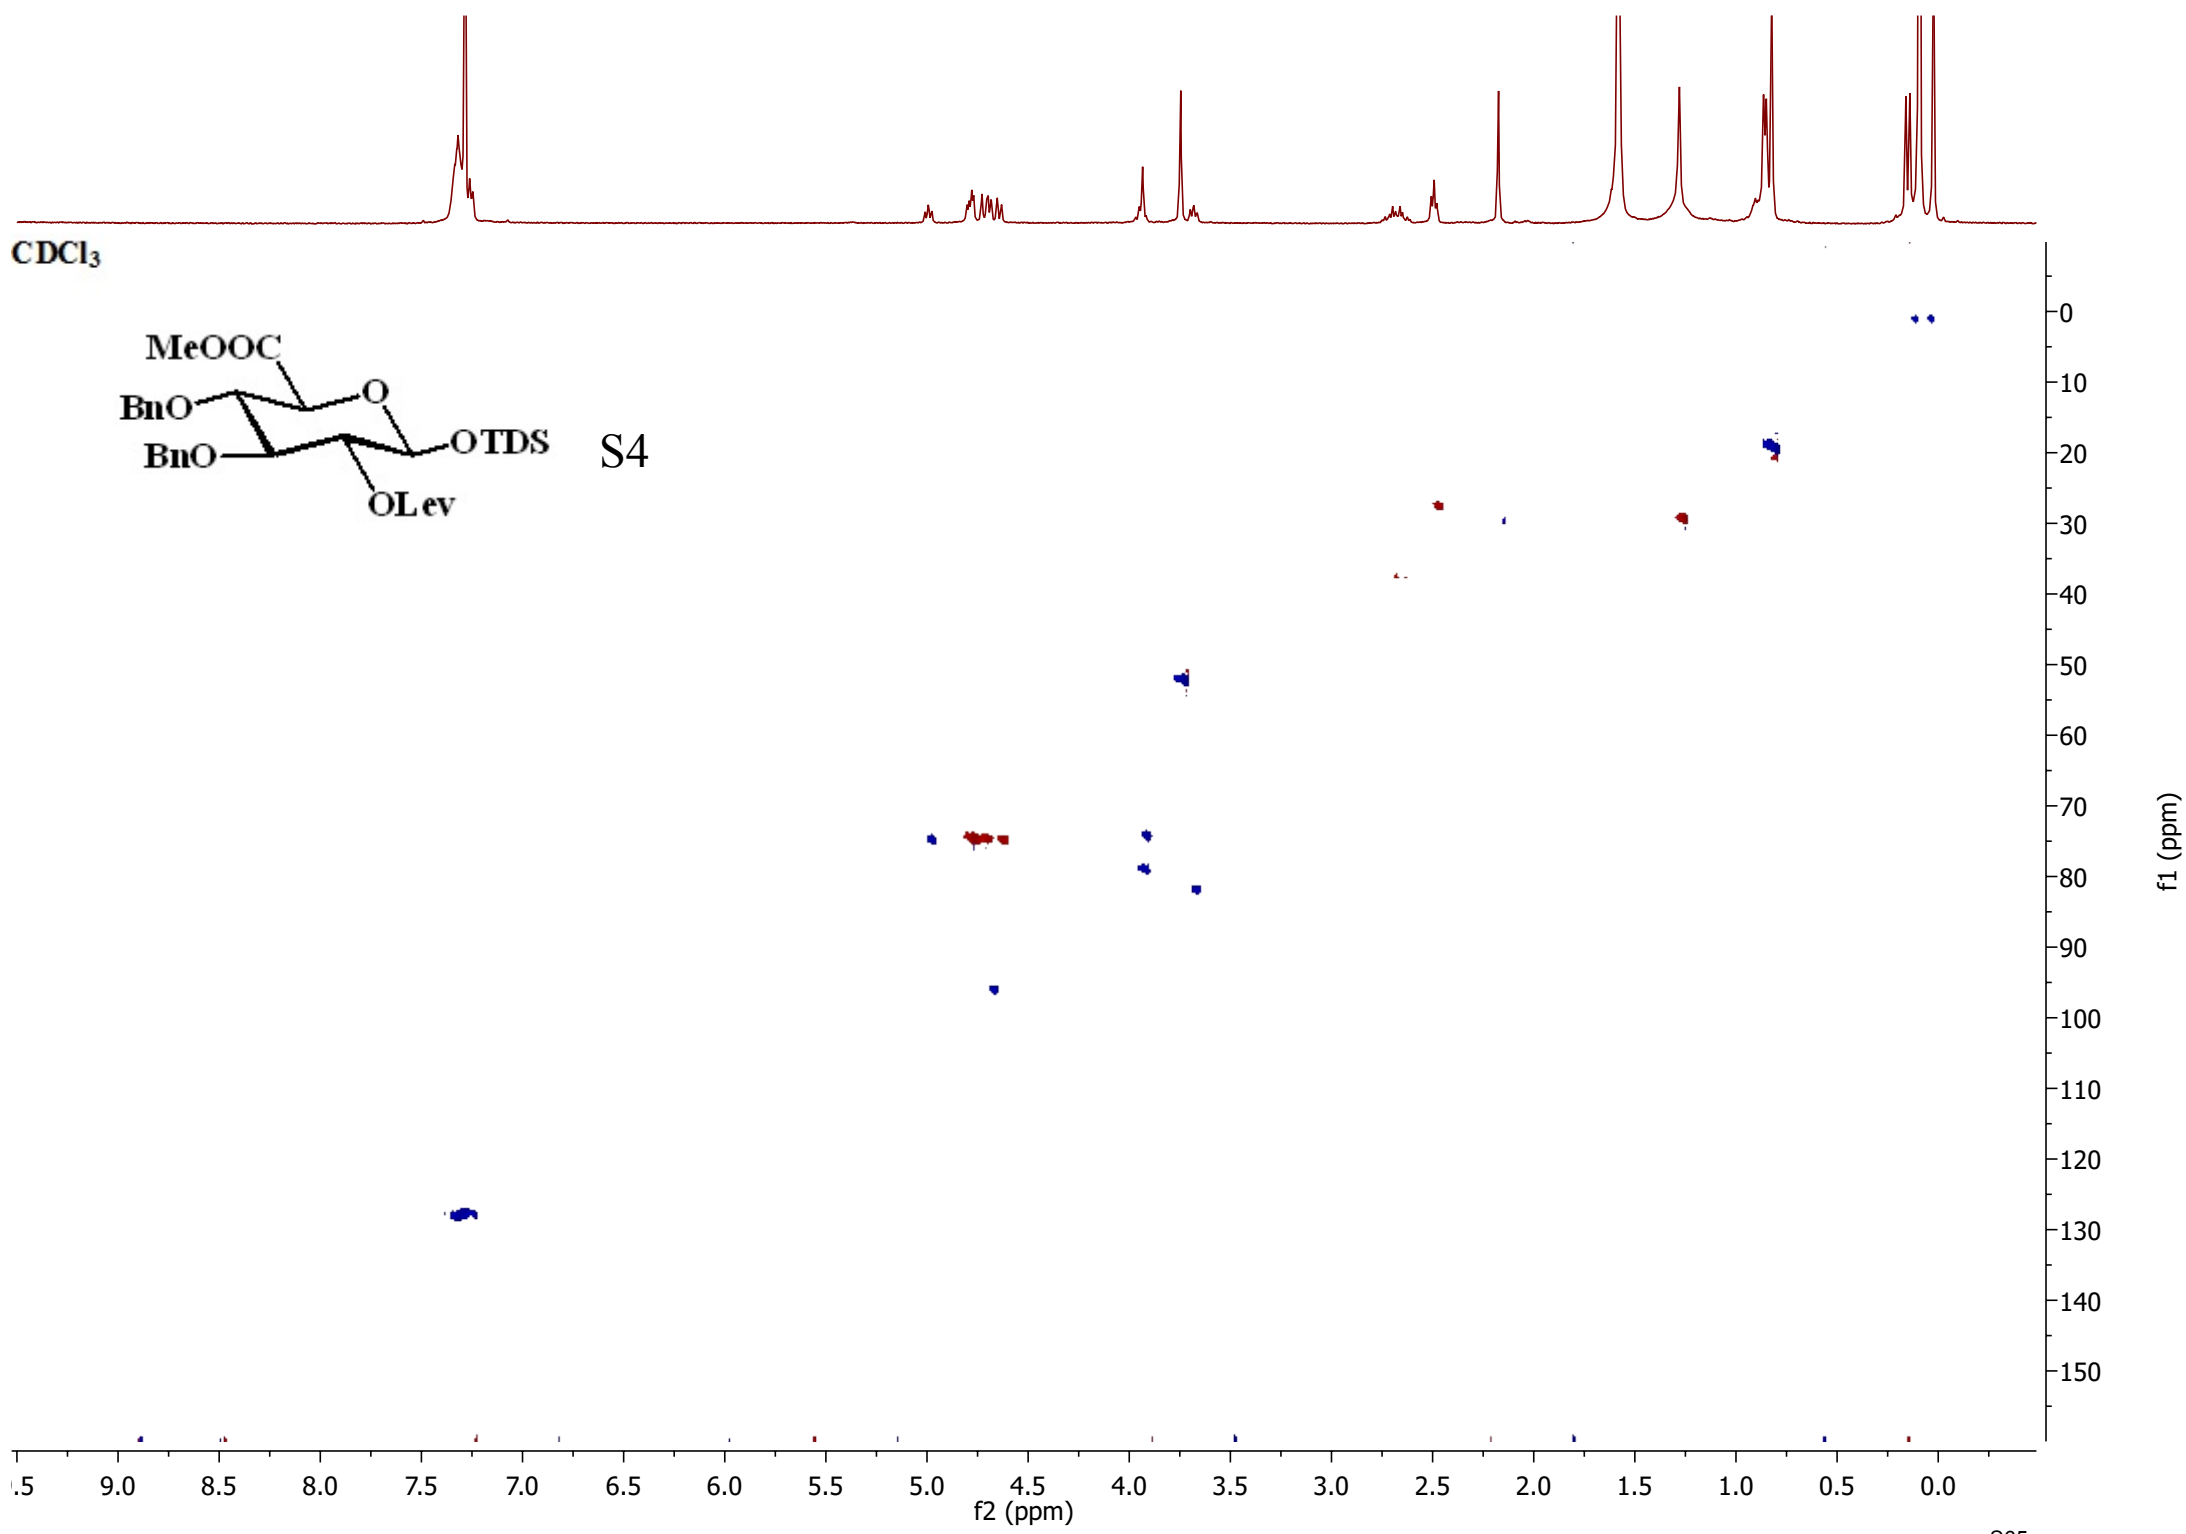

CDCl<sub>3</sub>

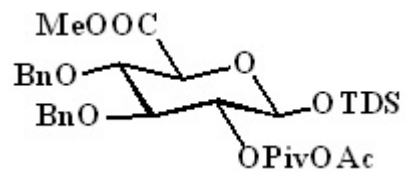

S5

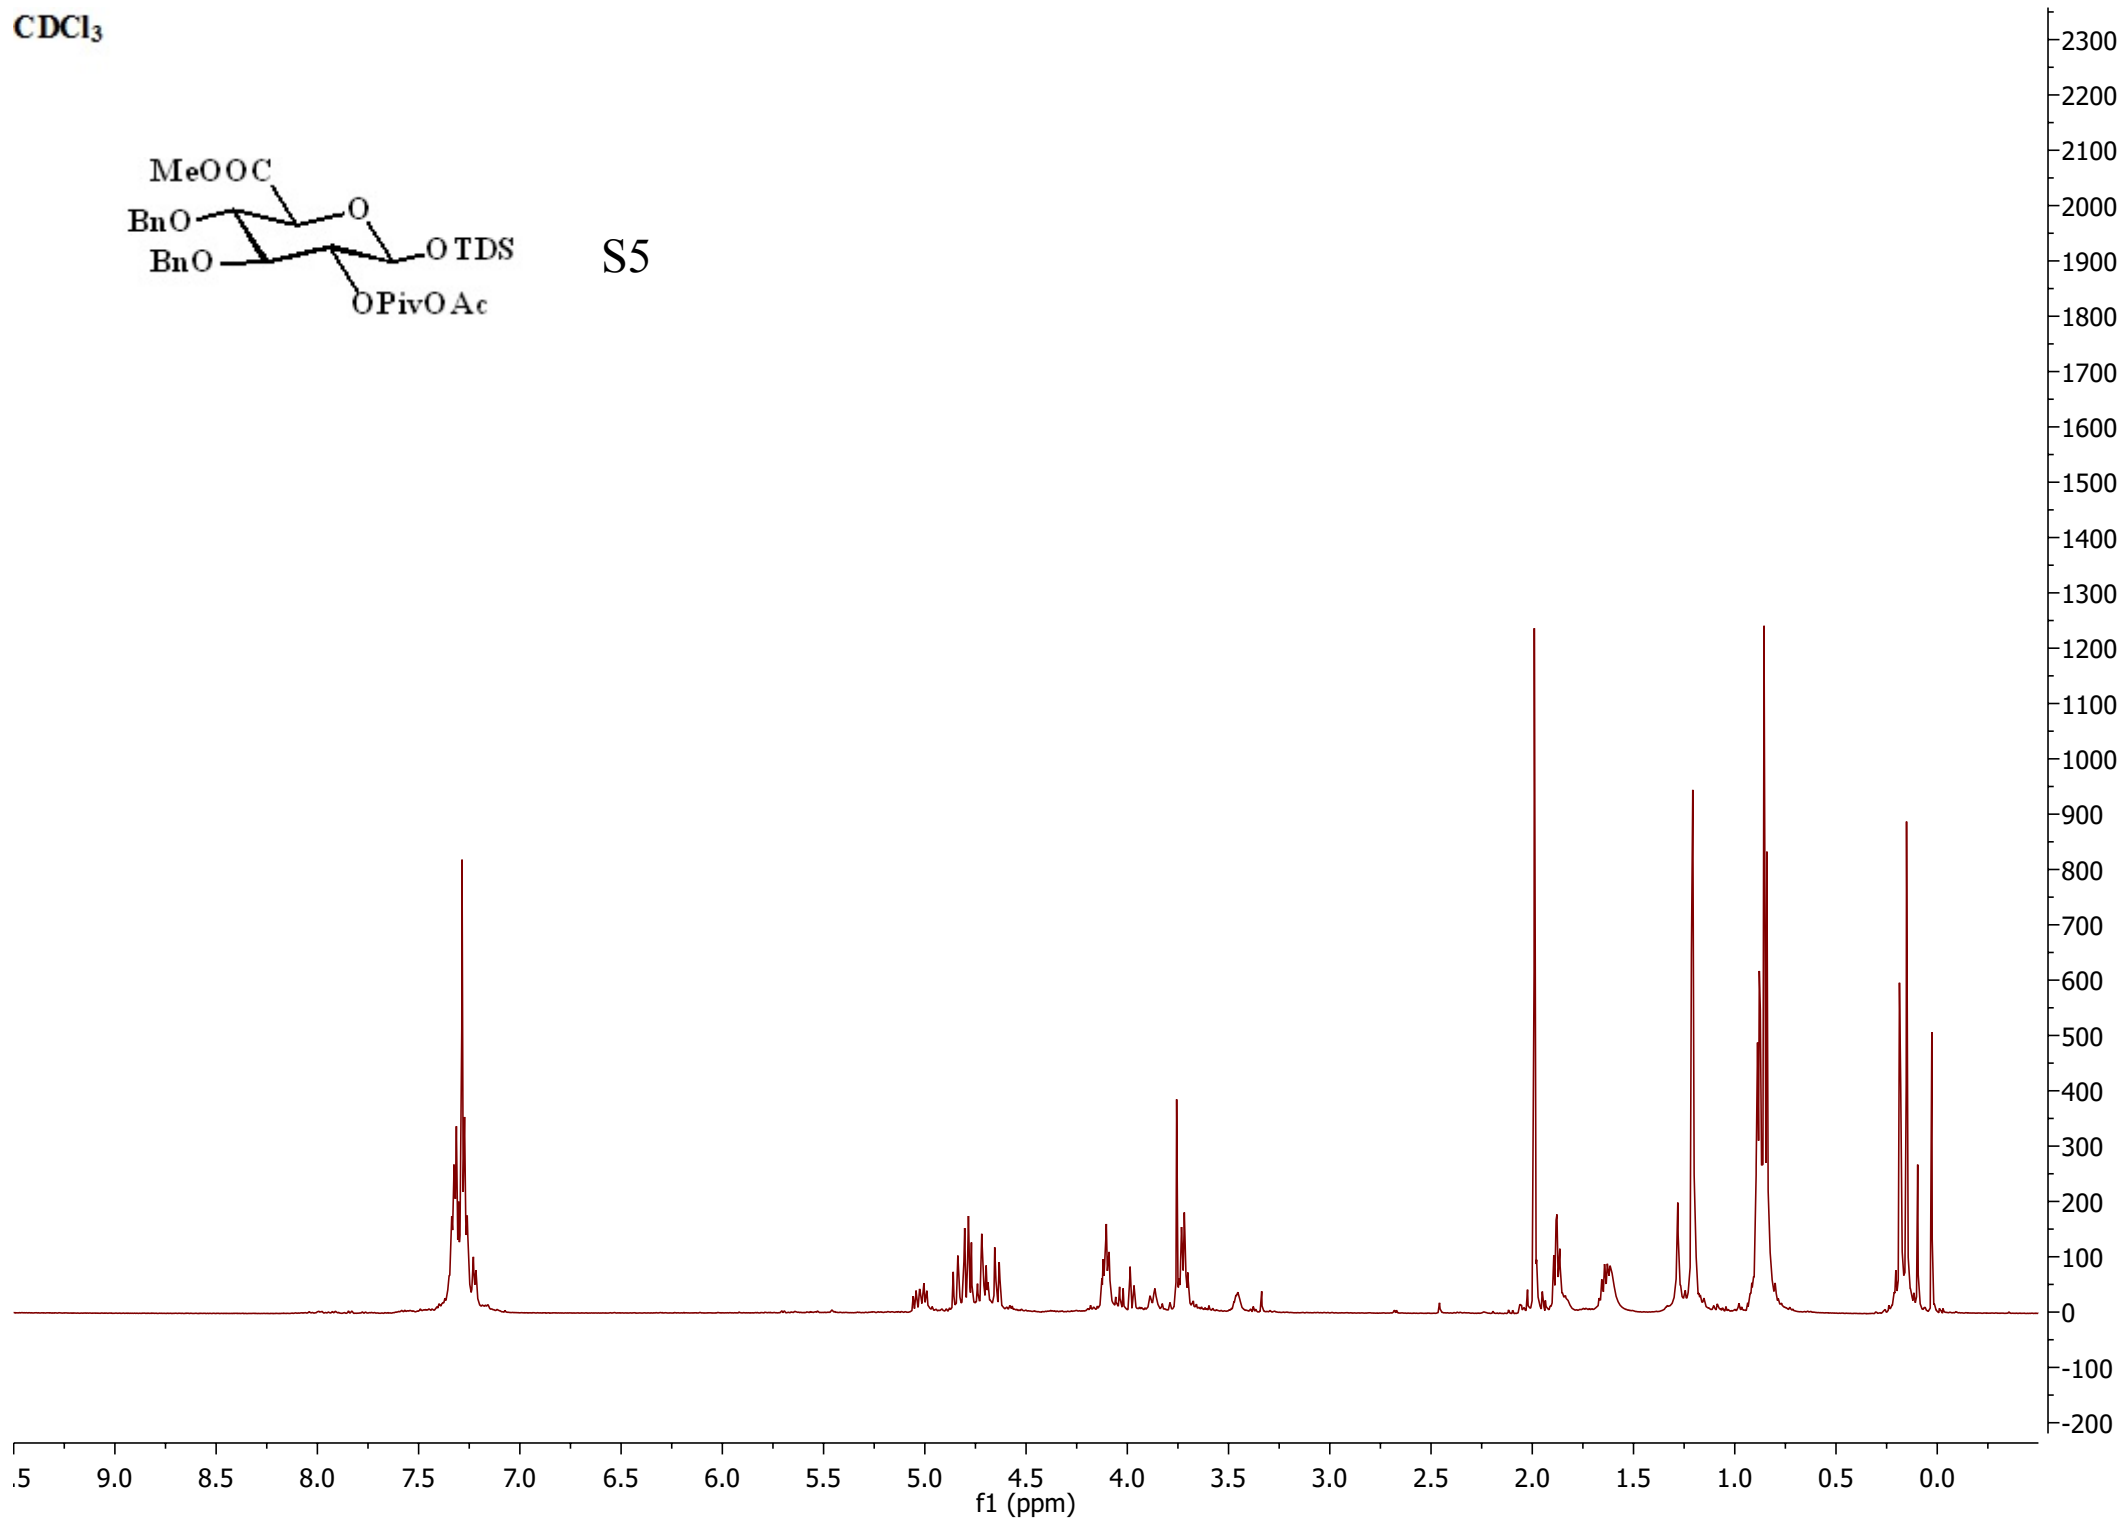

CDCl<sub>3</sub>

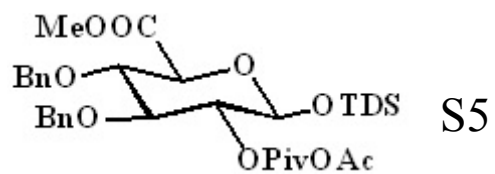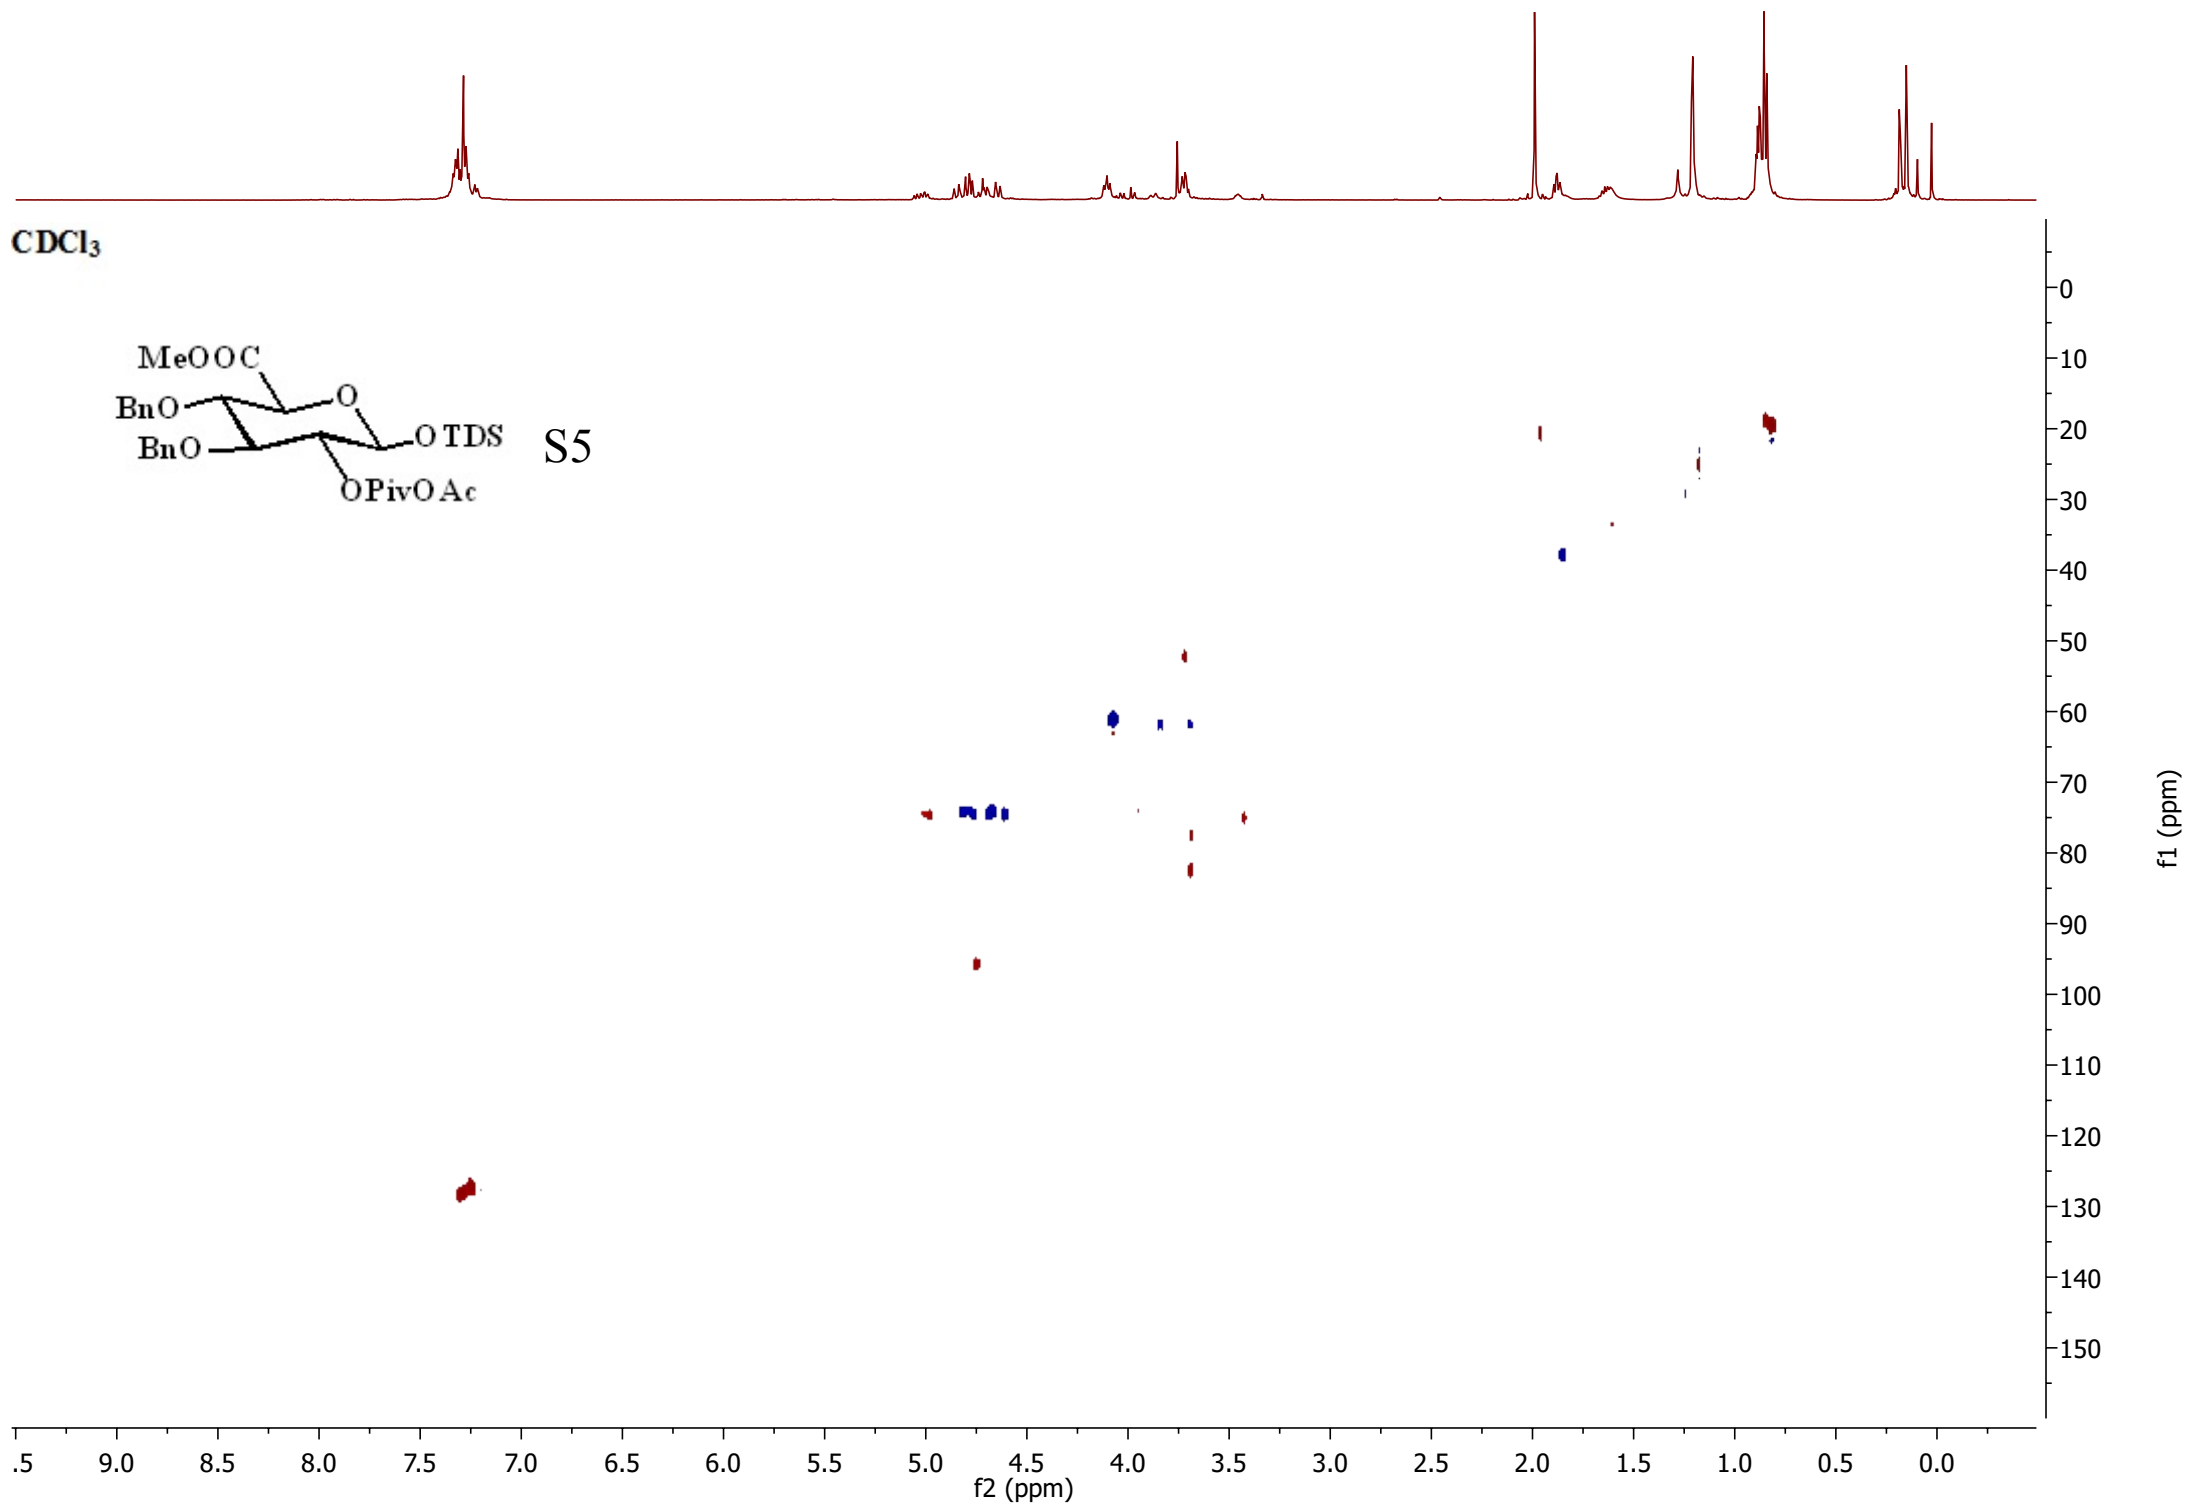

CDCl<sub>3</sub>

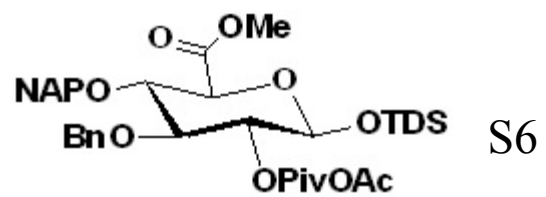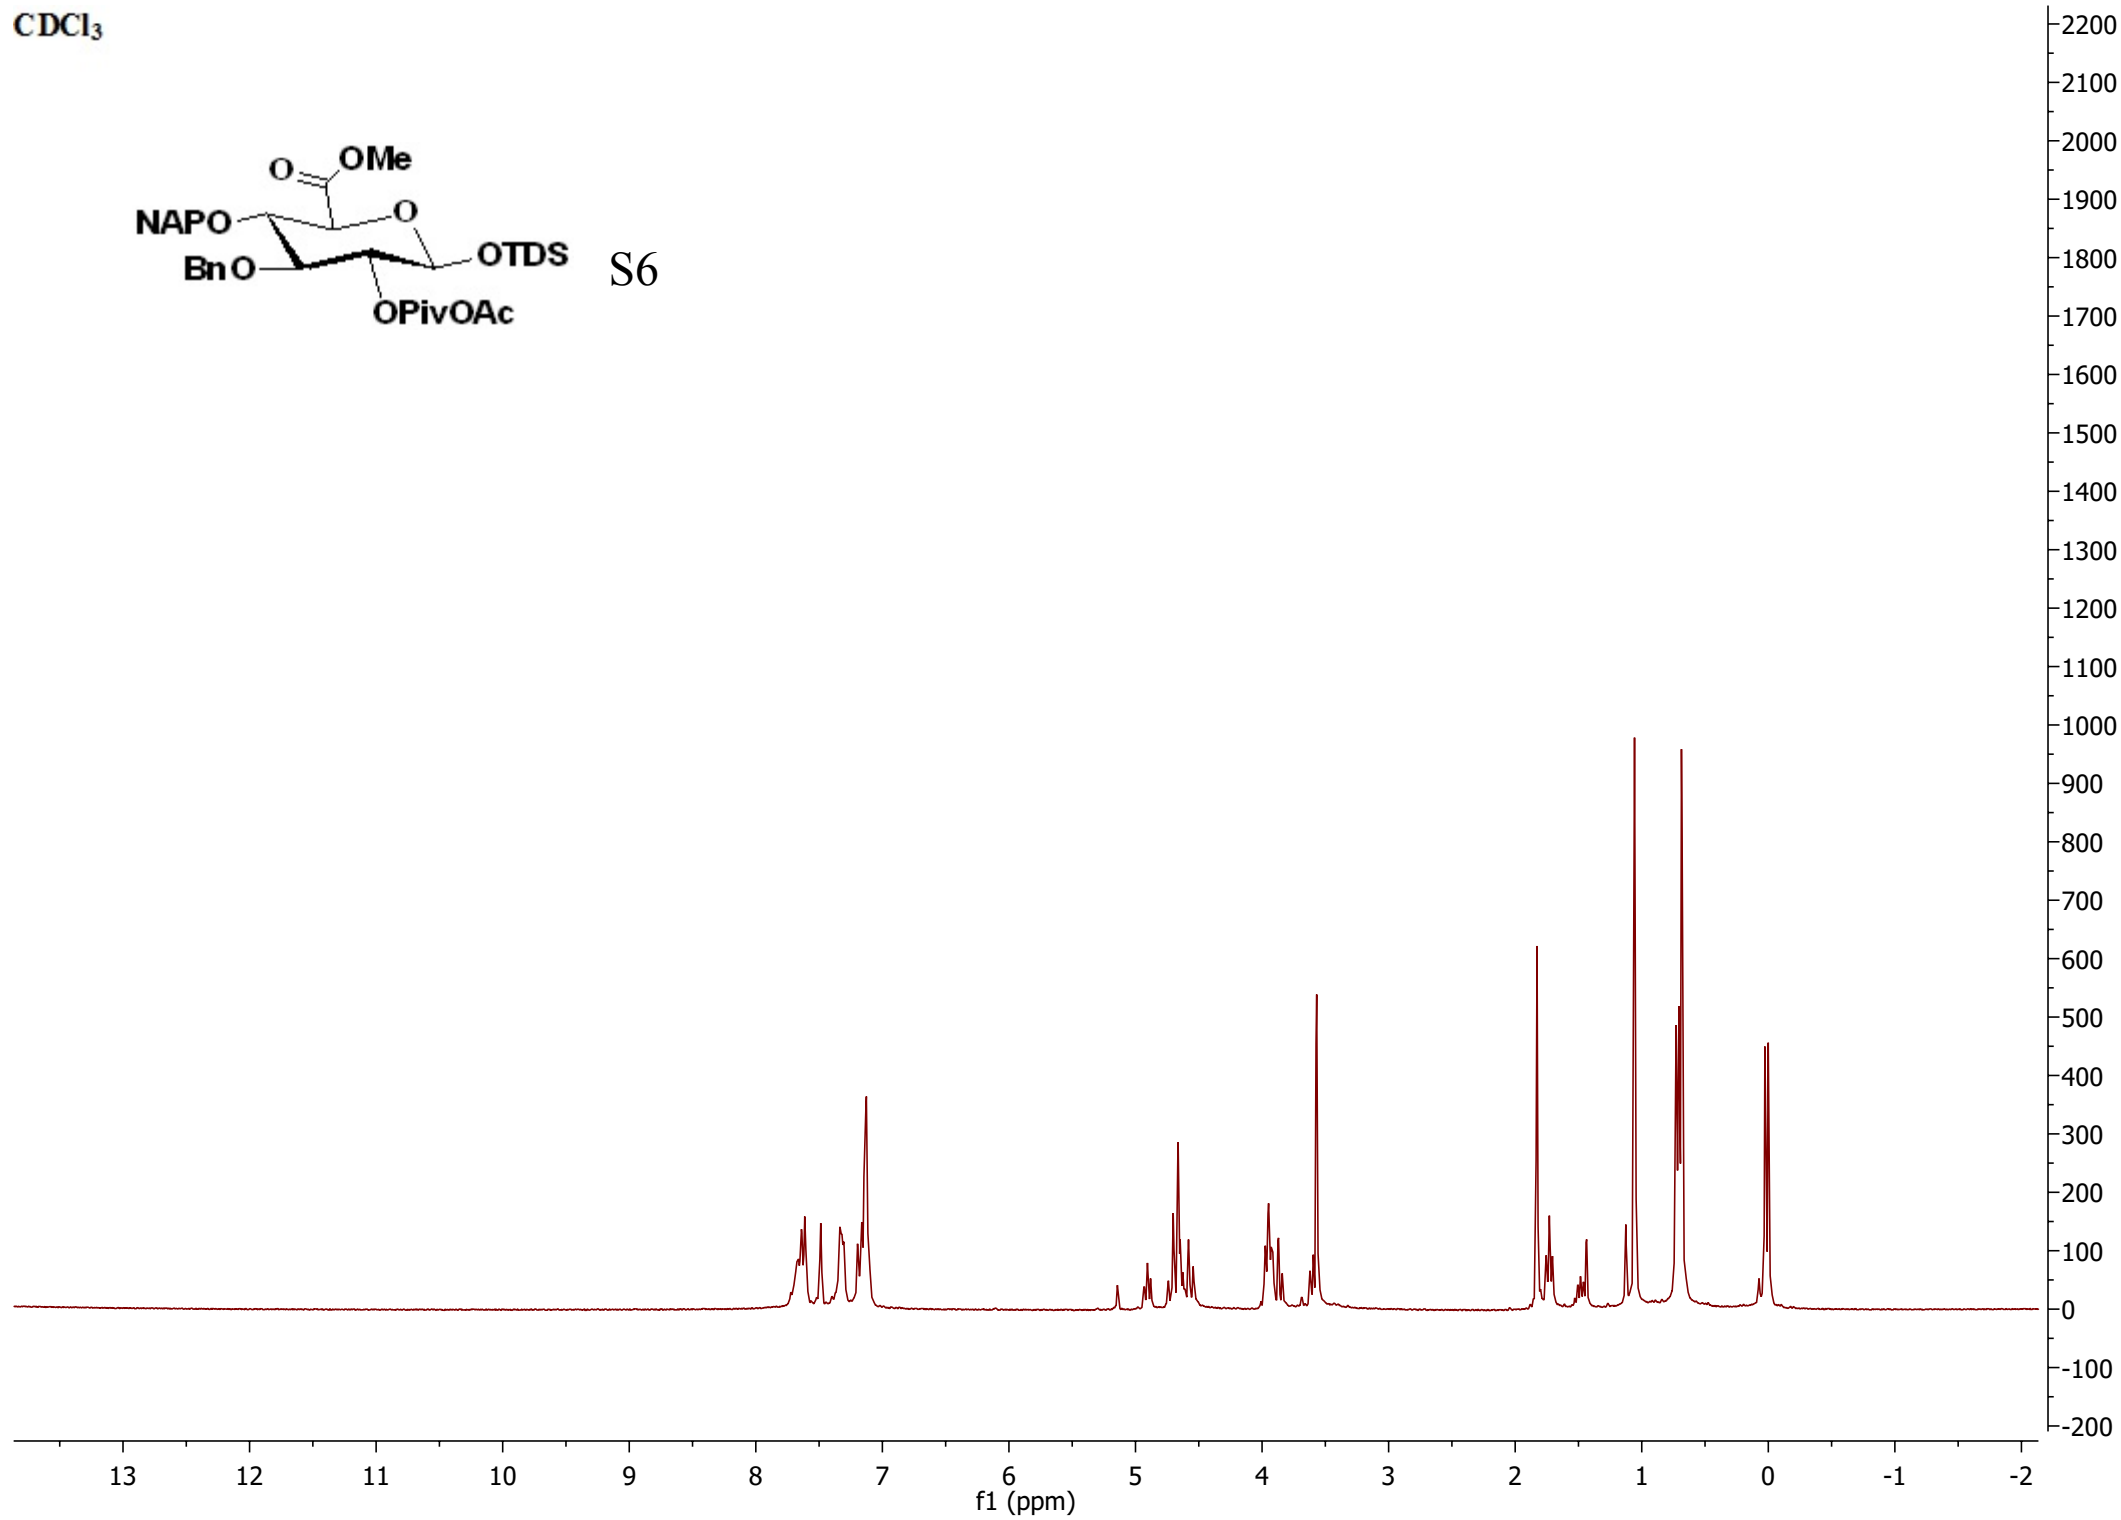

CDCl<sub>3</sub>

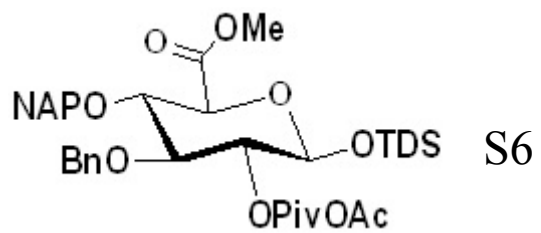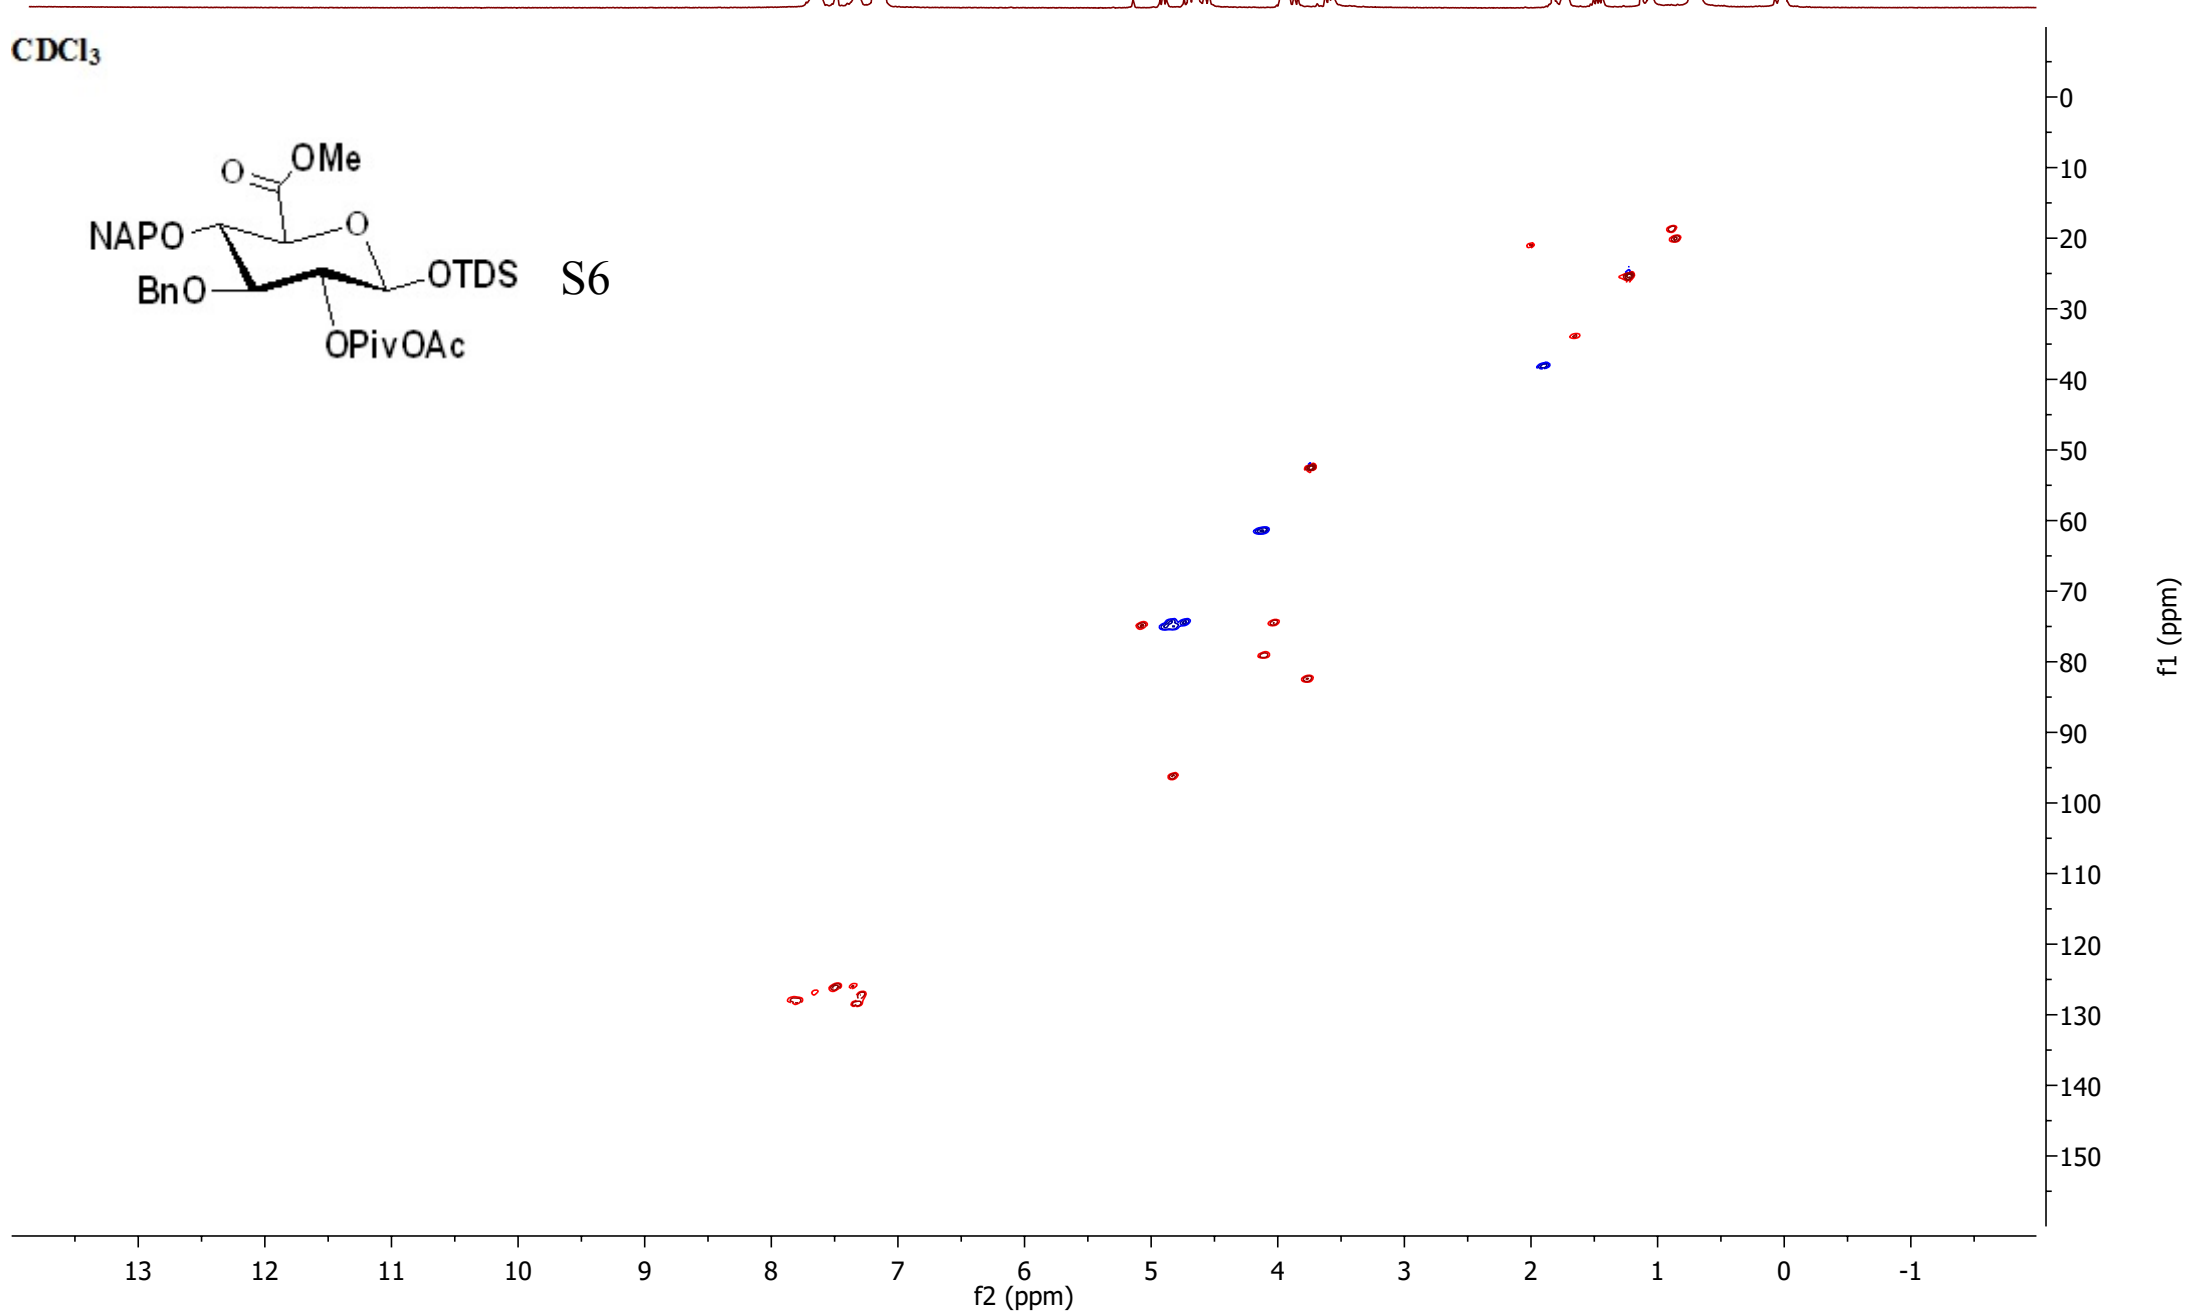

CDCl<sub>3</sub>

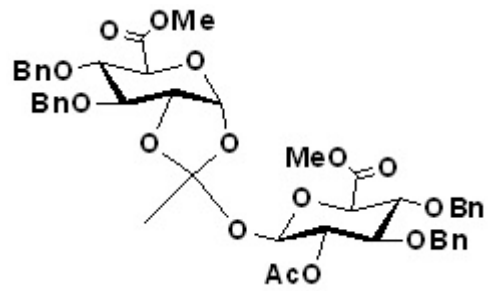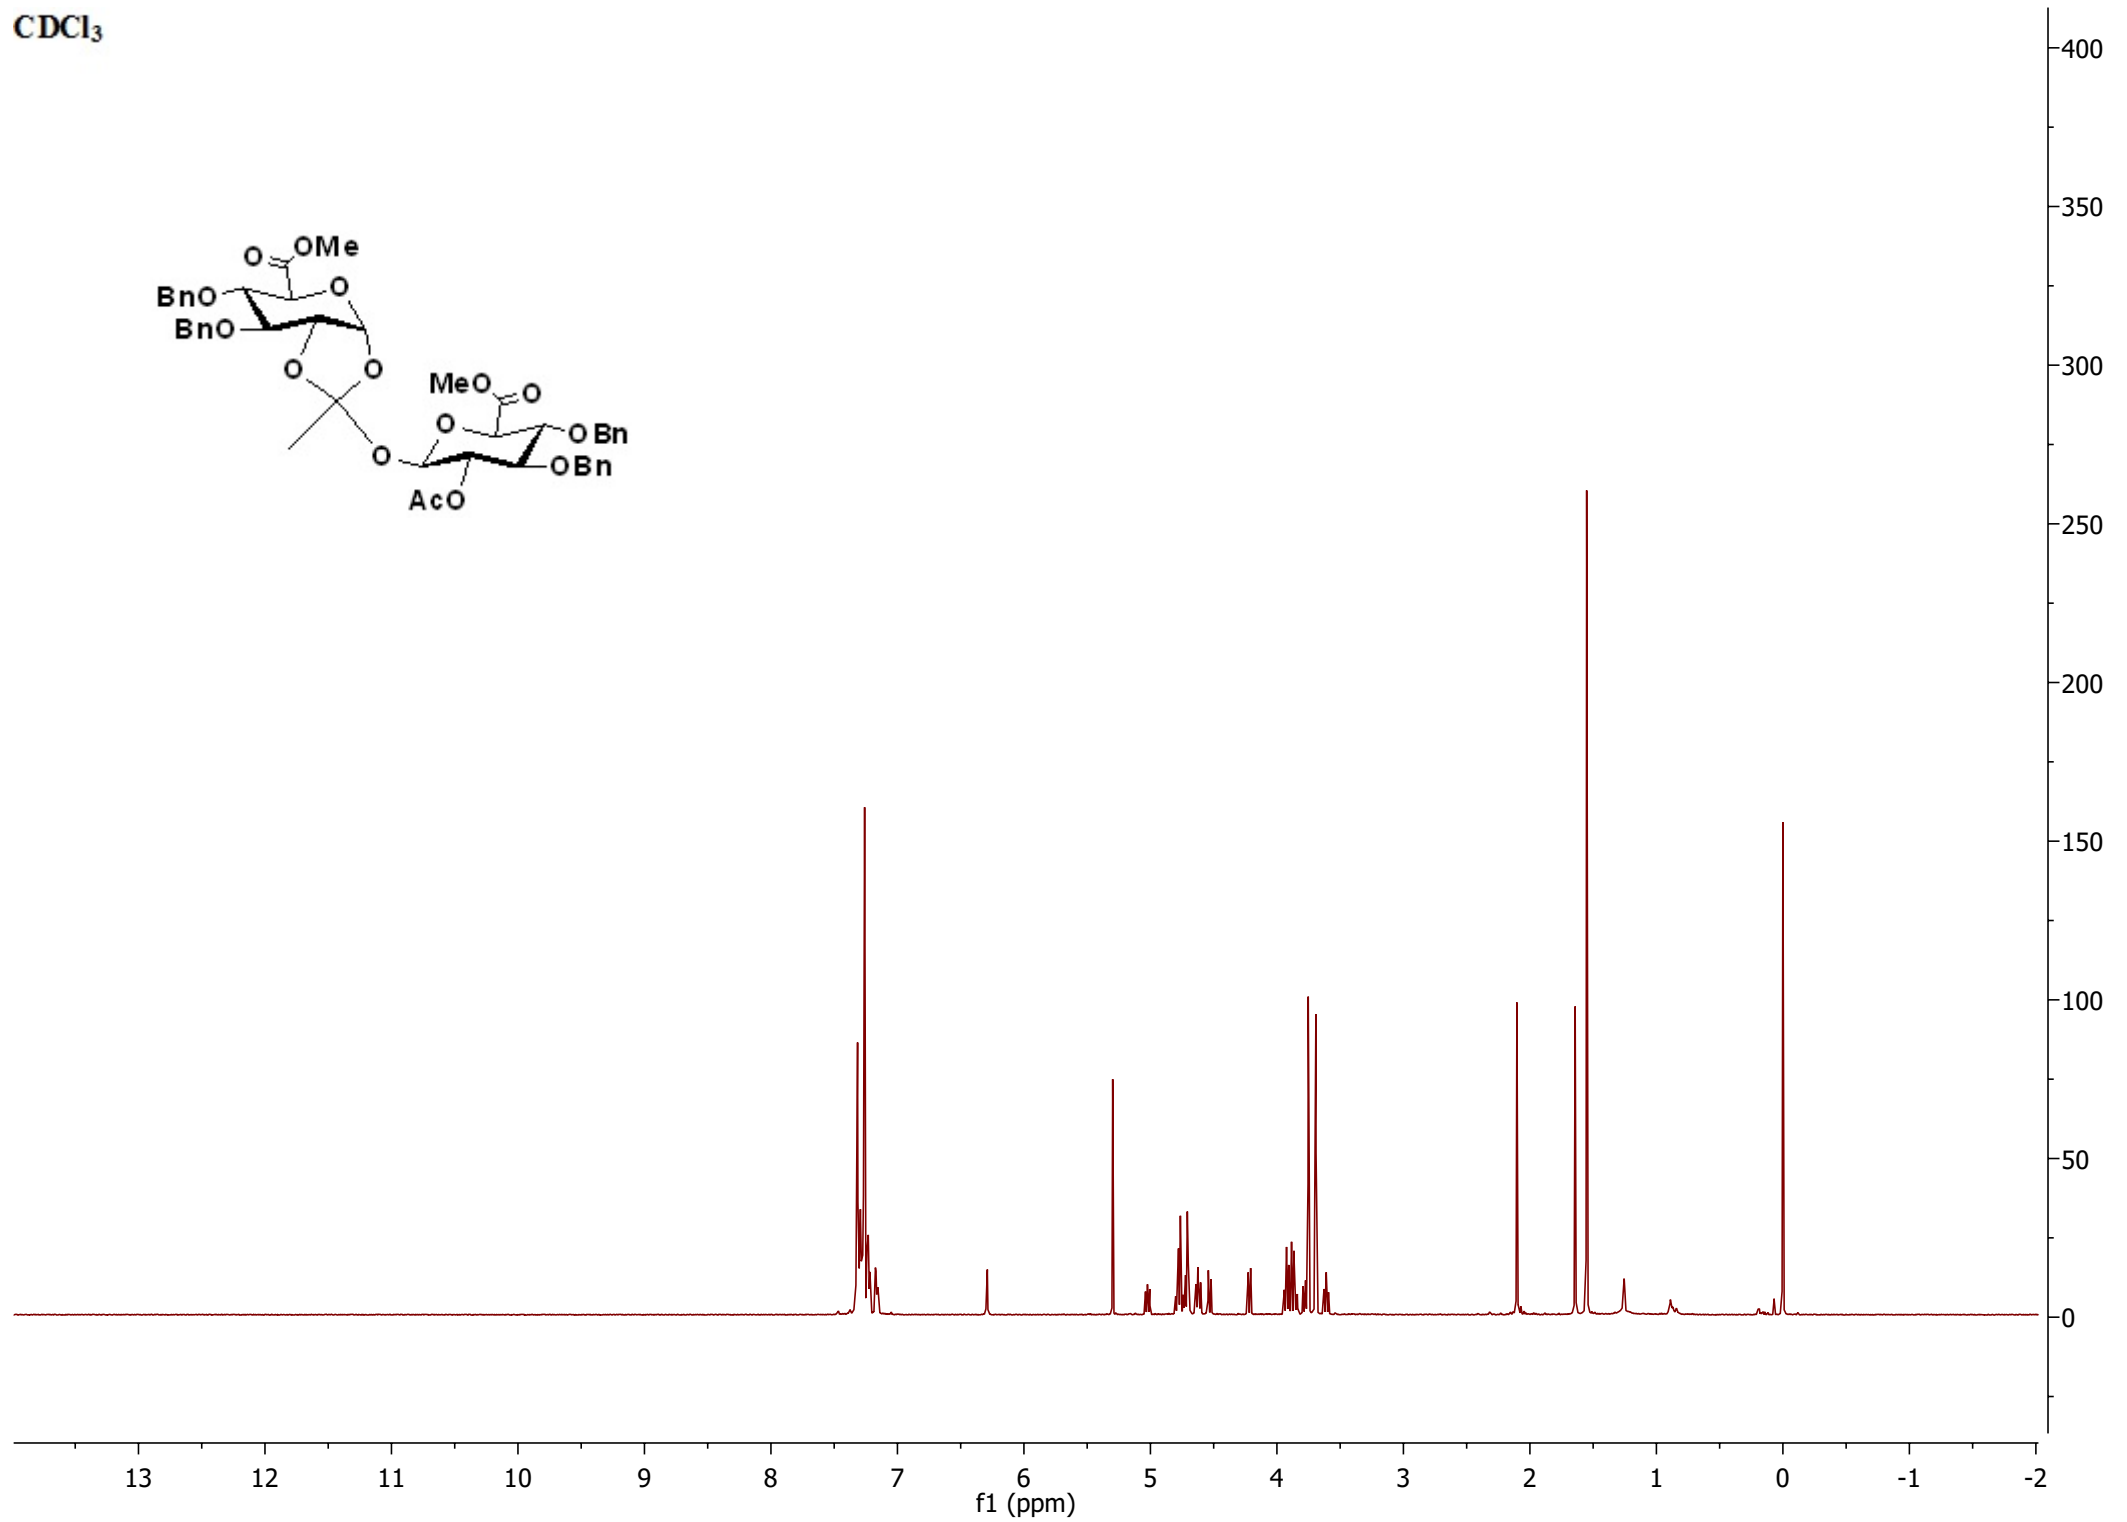

CDCl<sub>3</sub>

STANDARD 1H OBSERVE - profile

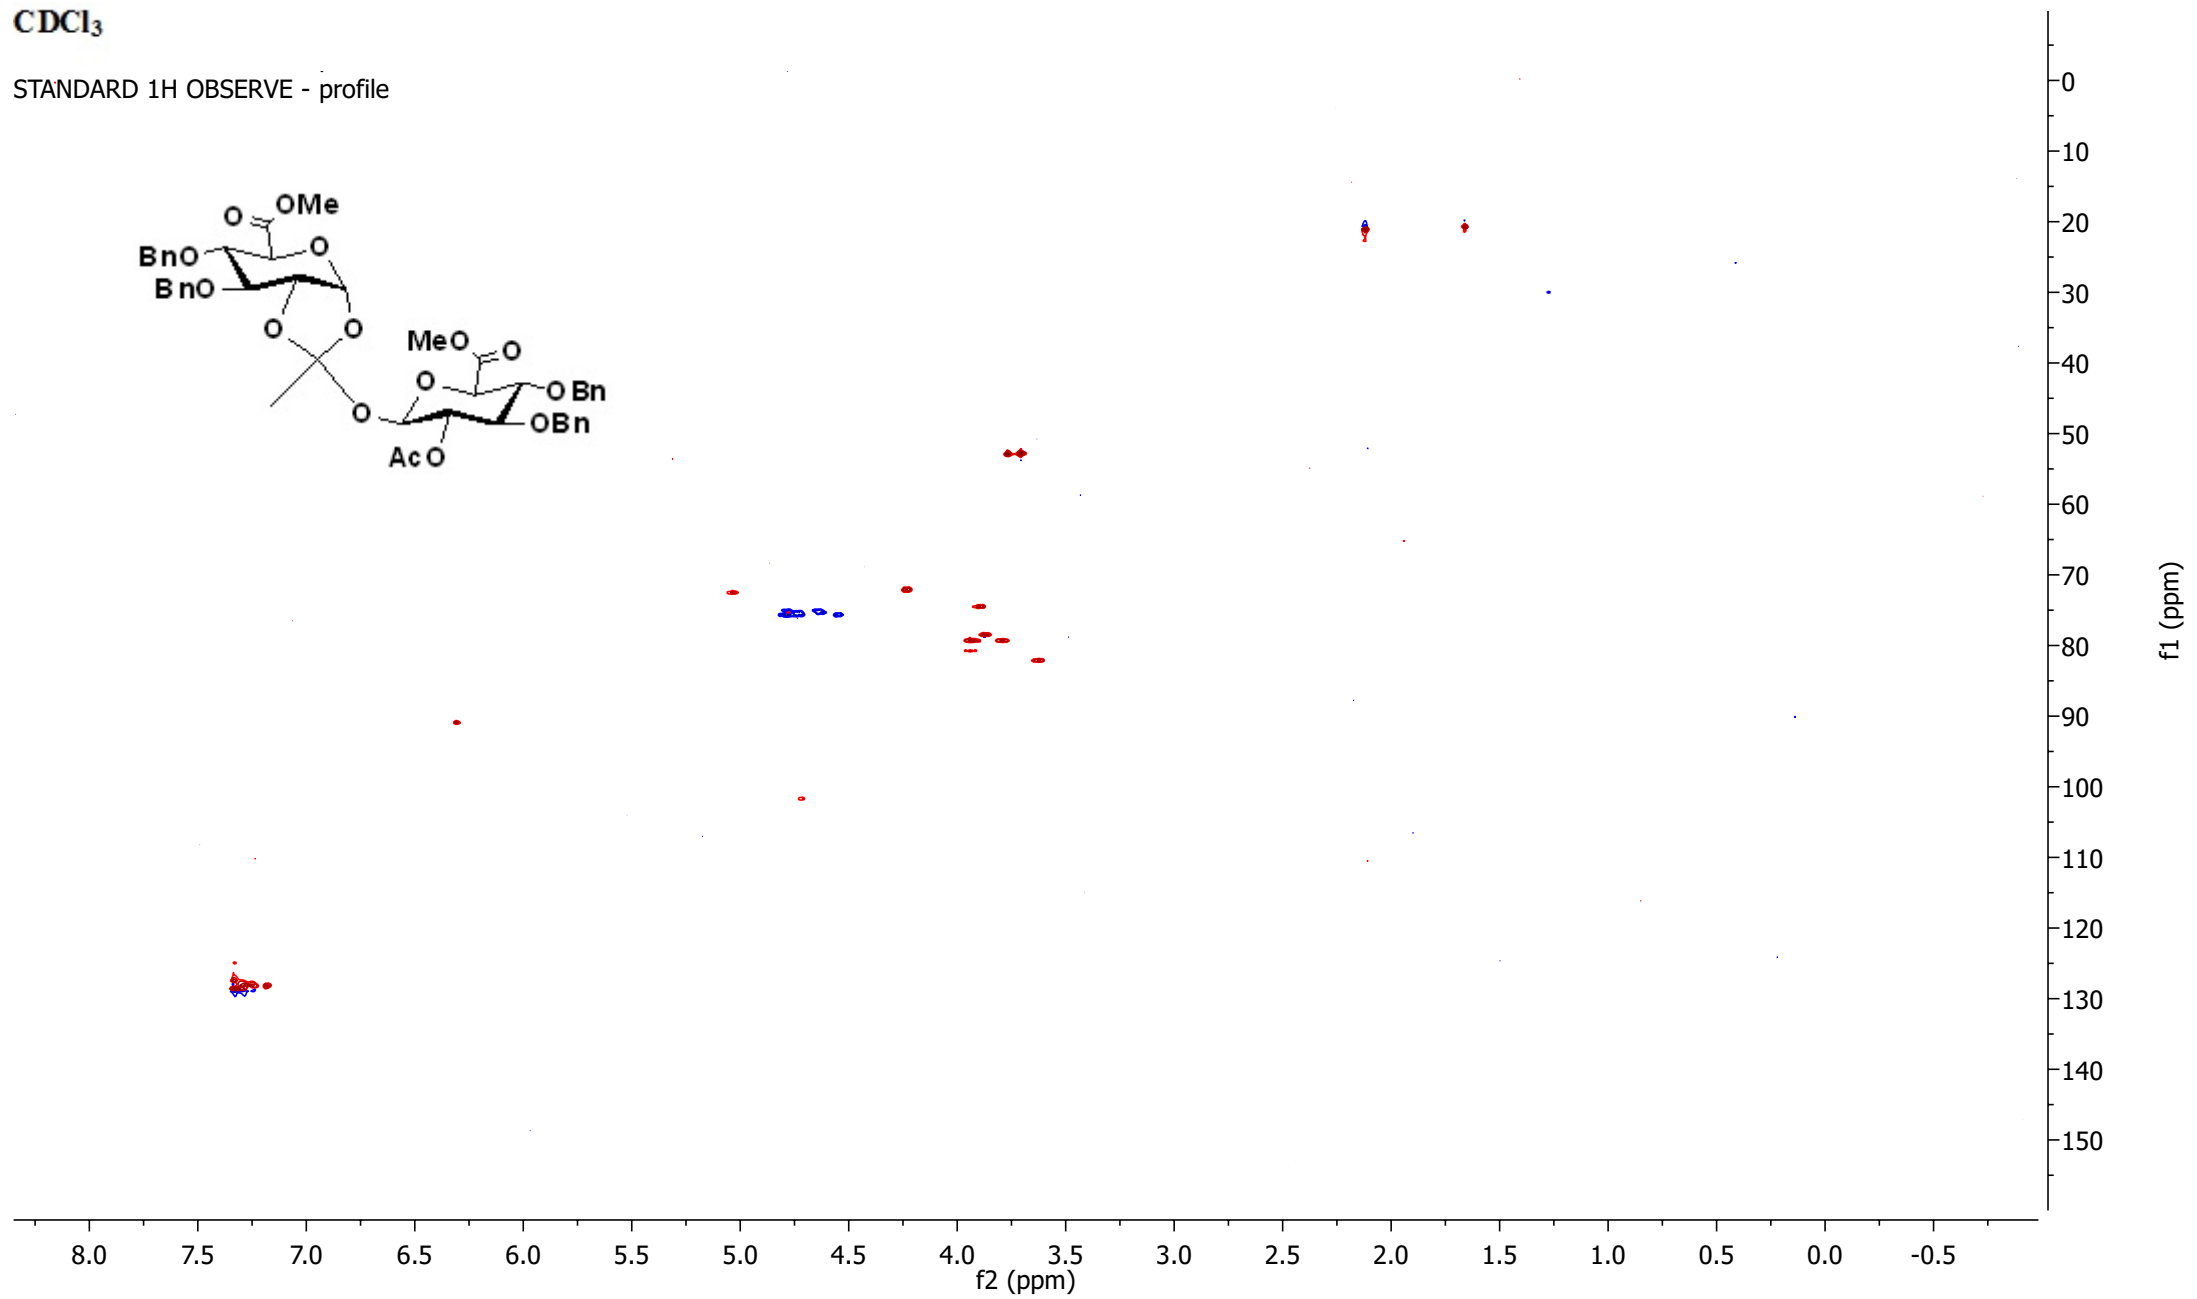

Supplement: c3ob42312c1.pdf [file c3ob42312c1.pdf]
